# Supplementary material for: Identification of Trichomonas vaginalis 5-Nitroimidazole Resistance Targets
Source: MDPI journal article supplement (doi:10.3390/pathogens12050692), 2023-05-10
Supplement: s1 [file s1]

**Table S1.** Total RNA quality of *T. vaginalis* isolates

| Isolate | Purity (A260/A280) | Concentration (ng/μl) |
|---------|--------------------|-----------------------|
| 252-1   | 2.01               | 1762.2                |
| 252-2   | 1.85               | 1059.5                |
| 252-3   | 1.92               | 1101.2                |
| 4266-1  | 1.82               | 326.3                 |
| 4266-2  | 1.42               | 1919.7                |
| 4266-3  | 2.00               | 1624.3                |
| 4448-1  | 1.98               | 1539.8                |
| 4448-2  | 2.04               | 1521.8                |
| 4448-3  | 1.91               | 1707.7                |
| 1073-1  | 1.94               | 1060.8                |
| 1073-2  | 1.85               | 1800.6                |
| 1073-3  | 1.79               | 383.2                 |
| 904-1   | 1.96               | 1241.1                |
| 904-2   | 1.98               | 1852.2                |
| 904-3   | 1.91               | 837.1                 |
| 1003-1  | 2.02               | 813.8                 |
| 1003-2  | 2.03               | 1784.1                |
| 1003-3  | 2.01               | 1275.7                |
| 1012-1  | 2.07               | 1603.8                |
| 1012-2  | 2.01               | 1514.3                |
| 1012-3  | 1.38               | 1871.9                |
| 1021-1  | 2.01               | 1274.5                |
| 1021-2  | 1.53               | 1963.3                |
| 1021-3  | 0.99               | 1708.6                |
