# Supplementary material for: Identification of Trichomonas vaginalis 5-Nitroimidazole Resistance Targets
Source: MDPI journal article supplement (doi:10.3390/pathogens12050692), 2023-05-10

**Figure S1.** Gene ontology enrichment word clouds for 134 upregulated genes. Molecular function; Biological process; Cellular component.

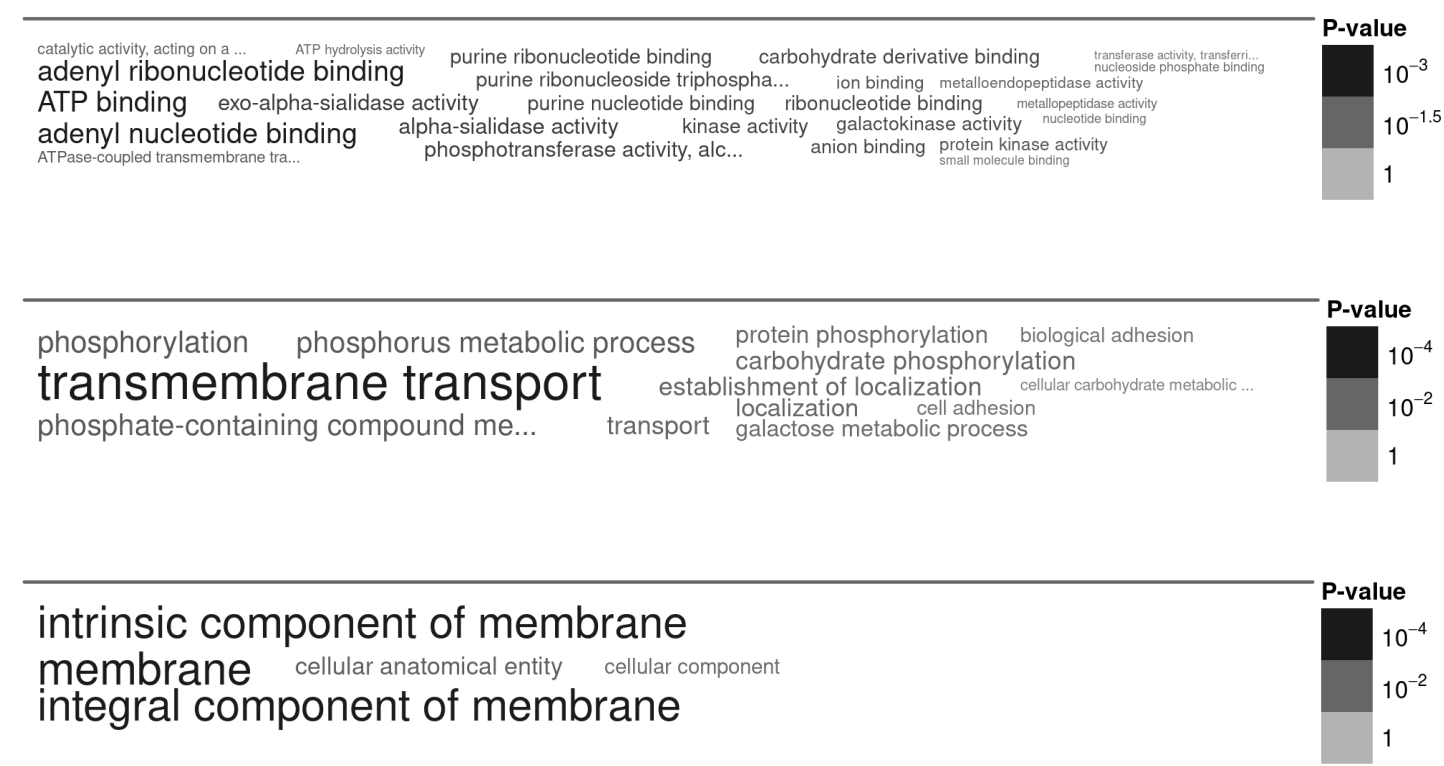

**Figure S2.** Gene ontology enrichment word clouds for 170 downregulated genes. Molecular function; Biological process; Cellular component.

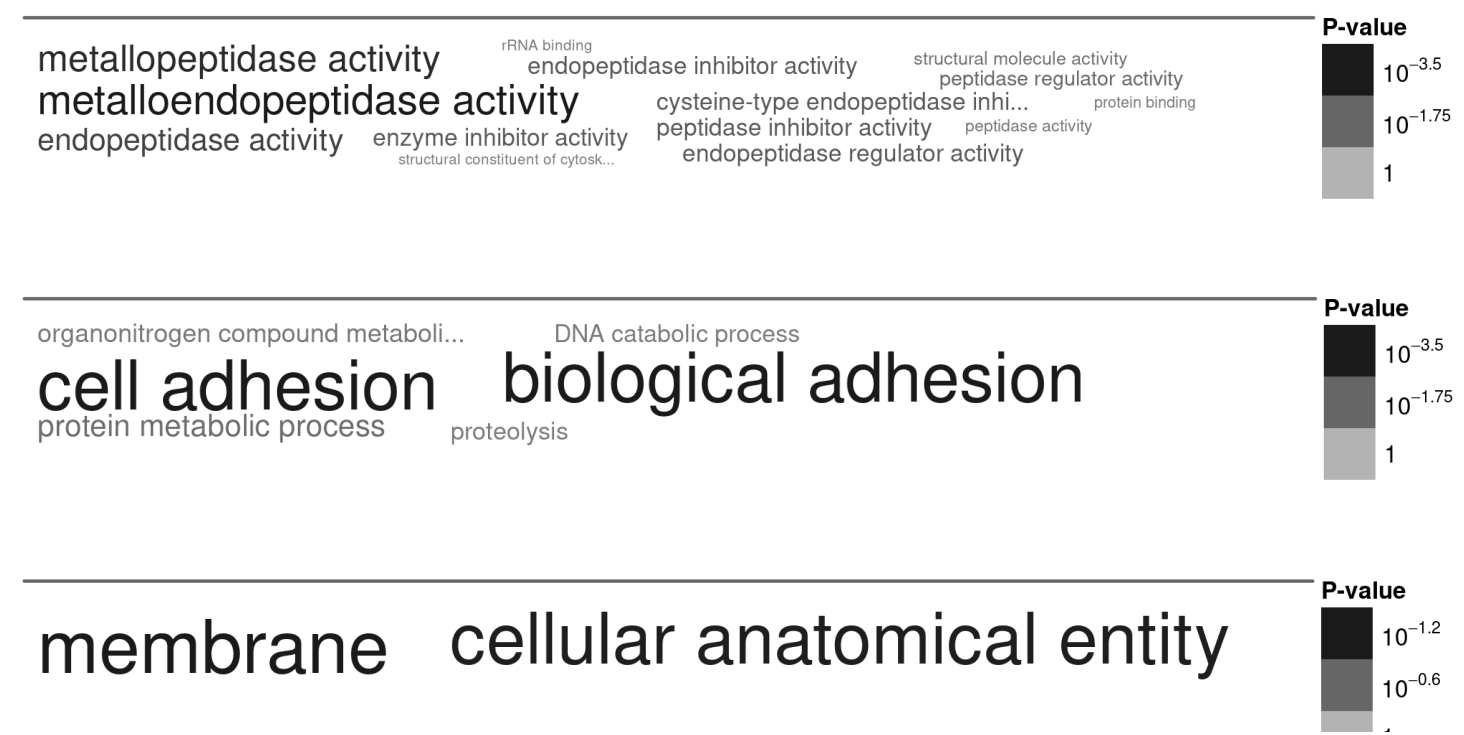

Supplement: s1 [file s1]
