# Supplementary material for: Identification of Trichomonas vaginalis 5-Nitroimidazole Resistance Targets
Source: Pathogens. 2023 May 10;12(5):692. doi: 10.3390/pathogens12050692 (PMC10223654; doi:10.3390/pathogens12050692)
Supplement: Supplementary file 1 [file pathogens-12-00692-s001.zip]

Archive with 6 entries (6 files):
- FiguresS1-S2_GO.pdf
- Tables_S4-S6_134_Upregulated_Genes.xlsx
- Tables_S7-S9_170_Downregulated_Genes.xlsx
- Table_S1_RNA.Purity_revised.pdf
- Table_S2_GeneExpression.xlsx
- Table_S3_304DysregulatedGenes.xlsx
