# Supplementary material for: Identification of Trichomonas vaginalis 5-Nitroimidazole Resistance Targets
Source: Pathogens. 2023 May 10;12(5):692. doi: 10.3390/pathogens12050692 (PMC10223654; doi:10.3390/pathogens12050692)
Supplement: Supplementary file 1 [file pathogens-12-00692-s001.zip › Table_S2_GeneExpression.xlsx]

## Sheet: Table S1
Table S2. EdgeR analysis of T. vaginalis transcriptome																				*A constant value of 1 was added to each read count in order to avoid dividing by zero when calculating fold changes of each gene transcript between MTZ-R and MTZ-S T. vaginalis isolates.
Input ID	Gene ID	FC (R/S)	LOG2FC (R/S)	LOGCPM	LR	P-value	-LOG10(P-value)	FDR	-log10(FDR)		X1003	X1012	X904	X1021	X1073	X252	X4266	X4448		X1003	X1012	X904	X1021	X1073	X252	X4266	X4448
EAY03171	TVAG_345450	0.00686221	-7.18711	5.96422	53.0246	3.29389e-13	12.4823	2.00516e-08	7.69785		2737	3145.33	42.3333	2572	13.3333	5	17.6667	18.3333		2738	3146.33	43.3333	2573	14.3333	6	18.6667	19.3333
EAY23245	TVAG_185520	27.8644	4.80035	8.85973	34.9794	3.33212e-09	8.47728	0.000101421	3.99387		412	957.333	277.333	879.667	48517.3	2158.33	5384	14442.7		413	958.333	278.333	880.667	48518.3	2159.33	5385	14443.7
EAY06981	TVAG_174500	11.1488	3.47881	4.10661	30.5456	3.26118e-08	7.48663	0.000661748	3.17931		64.6667	16	37.6667	95	1063.67	108.333	657	590		65.6667	17	38.6667	96	1064.67	109.333	658	591
EAX93632	TVAG_003210	69	6.10852	1.78816	28.1251	1.13723e-07	6.94415	0.00173072	2.76177		1.33333	0.333333	0	2	240.667	18	265.667	0.666667		2.33333	1.33333	1	3	241.667	19	266.667	1.66667
EAY05221	TVAG_474000	0.0108992	-6.51964	6.43001	26.3687	2.82071e-07	6.54964	0.00343422	2.46417		44.6667	3267.67	5592	22	22.3333	8.33333	42	20.6667		45.6667	3268.67	5593	23	23.3333	9.33333	43	21.6667
EAY17161	TVAG_303800	99.2174	6.63252	2.32006	24.7608	6.49036e-07	6.18773	0.00658501	2.18144		1.66667	0	0.666667	1.33333	725.667	19	2.66667	9.33333		2.66667	1	1.66667	2.33333	726.667	20	3.66667	10.3333
EAY02342	TVAG_054400	0.0275229	-5.18322	0.2595	22.4191	2.19183e-06	5.65919	0.0148253	1.829		90	32.3333	0	19	0	0	0	0		91	33.3333	1	20	1	1	1	1
EAY03170	TVAG_345440	0.0702929	-3.83048	4.06759	22.4213	2.18933e-06	5.65969	0.0148253	1.829		969.667	50.3333	118.667	1247.33	46.3333	13.6667	48.6667	55.3333		970.667	51.3333	119.667	1248.33	47.3333	14.6667	49.6667	56.3333
EAX84566	TVAG_604680	0.026465	-5.23977	0.54391	22.4869	2.11581e-06	5.67452	0.0148253	1.829		0.333333	52.6667	50.6667	68.6667	0	0.666667	0	0		1.33333	53.6667	51.6667	69.6667	1	1.66667	1	1
EAX92297	TVAG_108140	0.0415512	-4.58896	0.0208536	21.0737	4.41952e-06	5.35462	0.0269039	1.57019		84	9	8	15.3333	0.666667	0	0.333333	0		85	10	9	16.3333	1.66667	1	1.33333	1
EAY07932	TVAG_064800	51	5.67243	0.33822	20.5982	5.66489e-06	5.24681	0.03135	1.50376		0	0	0	0	69.6667	0	1.33333	129		1	1	1	1	70.6667	1	2.33333	130
EAY08577	TVAG_191000	26.8355	4.74607	3.99121	20.3476	6.45724e-06	5.18995	0.032757	1.4847		4.33333	0	1.66667	67	1588	183.667	157.333	133.333		5.33333	1	2.66667	68	1589	184.667	158.333	134.333
EAY23363	TVAG_070260	0.0200927	-5.63718	0.858498	20.0696	7.46752e-06	5.12682	0.0349681	1.45633		148	62.3333	0	1.33333	0	0	0	0.333333		149	63.3333	1	2.33333	1	1	1	1.33333
EAY04250	TVAG_474560	32.3239	5.01453	3.30329	19.59	9.59716e-06	5.01786	0.0417305	1.37955		22.6667	2.33333	1.33333	17	1368	25	23.6667	109.333		23.6667	3.33333	2.33333	18	1369	26	24.6667	110.333
EAY21850	TVAG_249100	14.3741	3.8454	5.78613	18.4037	1.78713e-05	4.74784	0.0518055	1.28562		87.6667	55.6667	4.33333	121	100.333	1710	1954.33	150.667		88.6667	56.6667	5.33333	122	101.333	1711	1955.33	151.667
EAX87558	TVAG_340120	0.0234009	-5.41729	1.07018	18.4125	1.77885e-05	4.74986	0.0518055	1.28562		0	86.6667	122	1	0	0	1	0		1	87.6667	123	2	1	1	2	1
EAY20140	TVAG_020850	14.6492	3.87275	2.68959	18.43	1.76257e-05	4.75385	0.0518055	1.28562		19	9.33333	14.6667	16.6667	768.333	23	97.3333	40		20	10.3333	15.6667	17.6667	769.333	24	98.3333	41
EAY15854	TVAG_160270	60.25	5.91289	0.946147	18.5284	1.67395e-05	4.77626	0.0518055	1.28562		0	0	0.666667	0.666667	64	0.333333	252.667	0.333333		1	1	1.66667	1.66667	65	1.33333	253.667	1.33333
EAY17465	TVAG_494070	0.0659041	-3.92349	3.45447	18.5557	1.65011e-05	4.78249	0.0518055	1.28562		94.3333	1030.67	25.6667	69.3333	19.3333	7	33	17.3333		95.3333	1031.67	26.6667	70.3333	20.3333	8	34	18.3333
EAY02930	TVAG_040800	0.0568807	-4.13592	2.0535	18.614	1.60042e-05	4.79577	0.0518055	1.28562		150.667	27	118	245.333	0.333333	1.66667	25	0		151.667	28	119	246.333	1.33333	2.66667	26	1
EAY19120	TVAG_190140	0.031517	-4.98773	4.95718	18.8804	1.39174e-05	4.85644	0.0518055	1.28562		70.3333	3340.33	43.6667	53	29.6667	5.33333	15	56.6667		71.3333	3341.33	44.6667	54	30.6667	6.33333	16	57.6667
EAY09792	TVAG_137840	23.3314	4.5442	3.01631	17.8379	2.40542e-05	4.61881	0.0522965	1.28153		3.33333	41	1.66667	7.33333	406.667	6	568.333	352.667		4.33333	42	2.66667	8.33333	407.667	7	569.333	353.667
EAX89383	TVAG_121270	24	4.58496	0.6295	17.8411	2.40137e-05	4.61954	0.0522965	1.28153		0	0	0.333333	1.33333	4.66667	45	82	0.333333		1	1	1.33333	2.33333	5.66667	46	83	1.33333
EAX96158	TVAG_270460	0.0382409	-4.70874	0.446709	17.9524	2.26494e-05	4.64494	0.0522965	1.28153		81.3333	0	26.3333	62.6667	0.333333	0.333333	0.333333	1.66667		82.3333	1	27.3333	63.6667	1.33333	1.33333	1.33333	2.66667
EAY04445	TVAG_396320	0.0110821	-6.49562	3.7561	17.9694	2.24479e-05	4.64882	0.0522965	1.28153		1.33333	1508.33	18	2.33333	4.66667	1	0.666667	6.66667		2.33333	1509.33	19	3.33333	5.66667	2	1.66667	7.66667
EAX94977	TVAG_205750	0.0649282	-3.94501	2.37717	18.0248	2.1804e-05	4.66146	0.0522965	1.28153		234	197.333	72	119	34.6667	0	2	0		235	198.333	73	120	35.6667	1	3	1
EAX94814	TVAG_103830	0.0415412	-4.58931	2.24854	18.1324	2.06065e-05	4.68599	0.0522965	1.28153		0	203	197.333	149.333	5.33333	0.333333	0.333333	13		1	204	198.333	150.333	6.33333	1.33333	1.33333	14
EAX98268	TVAG_090440	0.0157264	-5.99067	3.89958	18.1948	1.99428e-05	4.70021	0.0522965	1.28153		8.33333	1671.33	5.66667	6.33333	8	0.666667	4	10		9.33333	1672.33	6.66667	7.33333	9	1.66667	5	11
EAX91235	TVAG_210600	0.0233054	-5.42319	4.55904	17.6312	2.68146e-05	4.57163	0.0562875	1.24959		50	2508.33	79.6667	18.3333	48.3333	2.66667	2.33333	4.66667		51	2509.33	80.6667	19.3333	49.3333	3.66667	3.33333	5.66667
EAY18346	TVAG_254580	0.00368565	-8.08387	4.82759	17.5531	2.79399e-05	4.55377	0.0566947	1.24646		0	81.6667	2716.67	1.33333	0	2.33333	3	1		1	82.6667	2717.67	2.33333	1	3.33333	4	2
EAX97211	TVAG_218250	12.4255	3.63524	3.13597	17.4529	2.94509e-05	4.5309	0.0578331	1.23782		1.66667	41.3333	25.3333	6	484.667	138.333	232.333	114		2.66667	42.3333	26.3333	7	485.667	139.333	233.333	115
EAY15229	TVAG_202230	7.91862	2.98525	3.83113	17.16	3.43599e-05	4.46395	0.0653643	1.18466		17.3333	7	19	194.333	696.667	111.333	789	312.667		18.3333	8	20	195.333	697.667	112.333	790	313.667
EAX95115	TVAG_033350	0.108527	-3.20387	-1.20619	16.7583	4.24569e-05	4.37205	0.0783202	1.10613		13.6667	9	10	6.33333	0.666667	0	0	0		14.6667	10	11	7.33333	1.66667	1	1	1
EAY02340	TVAG_054380	0.0469314	-4.4133	-0.410361	16.5786	4.66744e-05	4.33092	0.0811801	1.09055		51	10.6667	0	26.6667	0	0	0	0.333333		52	11.6667	1	27.6667	1	1	1	1.33333
EAX85477	TVAG_242020	12.7046	3.66728	4.50018	16.6015	4.61149e-05	4.33616	0.0811801	1.09055		29.6667	60.6667	7.33333	56.3333	26	568.667	1321	87.6667		30.6667	61.6667	8.33333	57.3333	27	569.667	1322	88.6667
EAX96440	TVAG_284100	0.0743534	-3.74946	1.56408	16.5012	4.86204e-05	4.31318	0.0822158	1.08504		9.66667	200.333	77.6667	17.6667	9.66667	2.66667	4.66667	2		10.6667	201.333	78.6667	18.6667	10.6667	3.66667	5.66667	3
EAY20073	TVAG_365810	0.119587	-3.06387	5.59727	16.3967	5.13737e-05	4.28926	0.0845236	1.07302		867	563.667	2585.67	1275.67	21.6667	34.3333	503	70.3333		868	564.667	2586.67	1276.67	22.6667	35.3333	504	71.3333
EAY21242	TVAG_166170	0.0526316	-4.24793	0.682803	15.893	6.70273e-05	4.17375	0.0971496	1.01256		77.3333	18.3333	1	127.333	1.66667	0	5.66667	0.666667		78.3333	19.3333	2	128.333	2.66667	1	6.66667	1.66667
EAY18460	TVAG_083130	19.2917	4.26991	0.320748	15.9002	6.6773e-05	4.1754	0.0971496	1.01256		0.666667	0.666667	0.333333	2.33333	2.66667	18	123.667	6		1.66667	1.66667	1.33333	3.33333	3.66667	19	124.667	7
EAY19290	TVAG_452040	0.0816901	-3.61369	-0.0629912	15.9218	6.60152e-05	4.18036	0.0971496	1.01256		21.6667	16.3333	18.6667	57.6667	0	0.333333	0.666667	4.66667		22.6667	17.3333	19.6667	58.6667	1	1.33333	1.66667	5.66667
EAY02341	TVAG_054390	0.046595	-4.42368	-0.367755	15.9219	6.60119e-05	4.18038	0.0971496	1.01256		54.6667	12.6667	0	21.6667	0	0.333333	0	0		55.6667	13.6667	1	22.6667	1	1.33333	1	1
EAY16200	TVAG_340940	0.0197531	-5.66178	4.16546	15.997	6.3443e-05	4.19762	0.0971496	1.01256		2.66667	3.33333	1726	19	11.3333	3	10.6667	5.66667		3.66667	4.33333	1727	20	12.3333	4	11.6667	6.66667
EAY09301	TVAG_394730	6.15974	2.62287	2.43598	15.256	9.38802e-05	4.02743	0.109903	0.95899		23	14	27.6667	35.6667	68.3333	58	420.667	91.6667		24	15	28.6667	36.6667	69.3333	59	421.667	92.6667
EAX94805	TVAG_103740	0.133333	-2.90689	-1.60951	15.2829	9.25493e-05	4.03363	0.109903	0.95899		3	16.3333	3.66667	3	0	0	0	0		4	17.3333	4.66667	4	1	1	1	1
EAY16199	TVAG_340930	0.0208547	-5.58348	3.32143	15.2951	9.1957e-05	4.03642	0.109903	0.95899		1	3.33333	956.667	10	5.66667	2	7.66667	1		2	4.33333	957.667	11	6.66667	3	8.66667	2
EAY15853	TVAG_160260	27.7059	4.79212	0.0411247	15.3048	9.1486e-05	4.03865	0.109903	0.95899		0.333333	0	0	1.33333	36.3333	1.33333	114.667	0.666667		1.33333	1	1	2.33333	37.3333	2.33333	115.667	1.66667
EAY20791	TVAG_391750	0.171658	-2.54239	3.00167	15.3325	9.01533e-05	4.04502	0.109903	0.95899		563	48.6667	148.667	148.333	39	1.33333	46.6667	65.6667		564	49.6667	149.667	149.333	40	2.33333	47.6667	66.6667
EAX97716	TVAG_168130	0.128845	-2.95629	5.93167	15.3483	8.94018e-05	4.04865	0.109903	0.95899		228	755.333	4291	822	203	37	66	476		229	756.333	4292	823	204	38	67	477
EAX90910	TVAG_469850	0.0534351	-4.22607	2.27333	15.3957	8.71881e-05	4.05954	0.109903	0.95899		381.333	162	4	16.3333	3	5.66667	10	7.66667		382.333	163	5	17.3333	4	6.66667	11	8.66667
EAX98960	TVAG_321200	0.0353982	-4.82018	0.944088	15.4473	8.48373e-05	4.07141	0.109903	0.95899		0	30.3333	152	2	1	0	1.66667	0		1	31.3333	153	3	2	1	2.66667	1
EAY02082	TVAG_485170	13.0085	3.70139	2.22686	15.4513	8.46573e-05	4.07234	0.109903	0.95899		18.6667	1	0.666667	14.6667	356.333	79.6667	60	7.33333		19.6667	2	1.66667	15.6667	357.333	80.6667	61	8.33333
EAX66281	TVAG_522320	0.0257426	-5.2797	0.475418	15.548	8.04378e-05	4.09454	0.109903	0.95899		160.333	0	1.33333	2.66667	0.333333	0	0	0		161.333	1	2.33333	3.66667	1.33333	1	1	1
EAY16201	TVAG_340950	0.0381212	-4.71326	2.33198	15.2046	9.64687e-05	4.01561	0.110803	0.95545		1.66667	2.66667	466.333	15	4.66667	1.33333	5	3.66667		2.66667	3.66667	467.333	16	5.66667	2.33333	6	4.66667
EAY17345	TVAG_319400	0.136585	-2.87213	4.29996	15.1653	9.84982e-05	4.00657	0.111039	0.954526		76.6667	249	1392	199	80.3333	16.3333	40.3333	121.333		77.6667	250	1393	200	81.3333	17.3333	41.3333	122.333
EAX87944	TVAG_349060	0.0533808	-4.22754	-0.333305	14.9458	0.000110643	3.95608	0.122461	0.912001		13	0	35.3333	41.3333	0	0	1	0		14	1	36.3333	42.3333	1	1	2	1
EAY20622	TVAG_163180	0.257097	-1.95962	3.4295	14.8515	0.000116314	3.93437	0.12644	0.898116		229	234.667	442.667	123	69	16.6667	93	83		230	235.667	443.667	124	70	17.6667	94	84
EAX94976	TVAG_205740	0.0869658	-3.52341	3.86662	14.6499	0.000129439	3.88794	0.12709	0.895889		245.333	551.667	617	149.667	118.333	0.333333	12	1.66667		246.333	552.667	618	150.667	119.333	1.33333	13	2.66667
EAX93785	TVAG_339080	23.0986	4.52973	3.24131	14.6737	0.000127815	3.89342	0.12709	0.895889		11	9.66667	4.66667	41.6667	6.66667	3.33333	1297.33	328.667		12	10.6667	5.66667	42.6667	7.66667	4.33333	1298.33	329.667
EAY08241	TVAG_404090	0.172932	-2.53172	2.79904	14.7006	0.000126005	3.89961	0.12709	0.895889		92.3333	145	399	24.6667	42	5.33333	32.3333	31.3333		93.3333	146	400	25.6667	43	6.33333	33.3333	32.3333
EAY22465	TVAG_034880	0.0614806	-4.02373	1.2579	14.7179	0.000124857	3.90359	0.12709	0.895889		34	206.333	5	16.3333	1	1	10	0.333333		35	207.333	6	17.3333	2	2	11	1.33333
EAY23759	TVAG_120970	0.118879	-3.07243	4.55516	14.7324	0.000123896	3.90694	0.12709	0.895889		128	134	1839.67	202	69	5.66667	168.667	27		129	135	1840.67	203	70	6.66667	169.667	28
EAY22683	TVAG_476120	0.204411	-2.29046	3.46571	14.755	0.000122419	3.91215	0.12709	0.895889		306.667	612.333	72	184	42	15.3333	98	81.6667		307.667	613.333	73	185	43	16.3333	99	82.6667
EAX91545	TVAG_422400	64.2667	6.006	0.915367	14.5553	0.000136103	3.86613	0.131512	0.881035		0	0	0.333333	0.666667	1.33333	0	315.667	0.333333		1	1	1.33333	1.66667	2.33333	1	316.667	1.33333
EAY16797	TVAG_447560	7.5	2.90689	2.77622	14.4936	0.000140634	3.85191	0.133767	0.87365		64.6667	11	12.6667	41	277.667	14.3333	469	235		65.6667	12	13.6667	42	278.667	15.3333	470	236
EAX98504	TVAG_354420	67.8	6.08321	0.984377	14.4185	0.000146355	3.83459	0.13499	0.869698		0	1	0	0	0.666667	1.66667	0	332.667		1	2	1	1	1.66667	2.66667	1	333.667
EAY08083	TVAG_497060	8.99476	3.16909	2.79398	14.4442	0.000144375	3.84051	0.13499	0.869698		41	2	10.6667	6	146.667	178.667	17	226.333		42	3	11.6667	7	147.667	179.667	18	227.333
EAX92046	TVAG_441090	0.0130674	-6.25789	5.432	14.252	0.000159888	3.79618	0.135183	0.869078		30.6667	13	21.6667	8119	46	21	20.6667	15.3333		31.6667	14	22.6667	8120	47	22	21.6667	16.3333
EAX94102	TVAG_336650	26.0217	4.70165	1.25096	14.2598	0.000159227	3.79798	0.135183	0.869078		2	2	0.333333	7	0.333333	1.66667	202	191		3	3	1.33333	8	1.33333	2.66667	203	192
EAX90370	TVAG_036820	9.01633	3.17254	2.30145	14.2659	0.000158718	3.79937	0.135183	0.869078		14	0	8.33333	55.3333	86.3333	18.3333	317	310.667		15	1	9.33333	56.3333	87.3333	19.3333	318	311.667
EAX89861	TVAG_302980	15.5964	3.96314	3.82142	14.2737	0.000158059	3.80118	0.135183	0.869078		11.3333	19	1.33333	38.6667	4.33333	397	744.333	9.66667		12.3333	20	2.33333	39.6667	5.33333	398	745.333	10.6667
EAY19297	TVAG_452110	0.0918367	-3.44478	0.397677	14.3063	0.000155344	3.80871	0.135183	0.869078		27	10.6667	81.6667	7.33333	0.333333	0.333333	4	3.33333		28	11.6667	82.6667	8.33333	1.33333	1.33333	5	4.33333
EAY21188	TVAG_283570	7.92079	2.98564	1.86573	14.3703	0.000150152	3.82347	0.135183	0.869078		1.66667	8.66667	13.6667	5.66667	85.6667	105	12.6667	59.3333		2.66667	9.66667	14.6667	6.66667	86.6667	106	13.6667	60.3333
EAX90028	TVAG_411680	26.8947	4.74925	0.477992	14.2239	0.000162298	3.78969	0.135341	0.86857		0	0	0	2.33333	0	23.3333	2.66667	140.333		1	1	1	3.33333	1	24.3333	3.66667	141.333
EAY02538	TVAG_494870	0.0159341	-5.97174	2.27184	14.037	0.00017925	3.74654	0.139895	0.854196		598.667	1.33333	1.66667	1	0.666667	1.66667	3	0.333333		599.667	2.33333	2.66667	2	1.66667	2.66667	4	1.33333
EAY10485	TVAG_483960	0.170846	-2.54923	0.964869	14.0513	0.00017789	3.74985	0.139895	0.854196		52.3333	21	71	64.3333	9	1	17	5.33333		53.3333	22	72	65.3333	10	2	18	6.33333
EAY14615	TVAG_393430	22.7895	4.5103	1.13352	14.062	0.000176879	3.75232	0.139895	0.854196		0	2.33333	0	0	1.33333	79.6667	59.3333	0		1	3.33333	1	1	2.33333	80.6667	60.3333	1
EAX95112	TVAG_033320	17.5	4.12928	0.285426	14.0788	0.000175312	3.75619	0.139895	0.854196		0	0.333333	1.33333	3.66667	135.667	7	12	4.66667		1	1.33333	2.33333	4.66667	136.667	8	13	5.66667
EAX87365	TVAG_015280	0.0573477	-4.12412	-0.313125	14.1003	0.000173312	3.76117	0.139895	0.854196		0	26.6667	24.6667	37.6667	1	0.333333	0	0		1	27.6667	25.6667	38.6667	2	1.33333	1	1
EAY03817	TVAG_454560	0.18746	-2.41535	2.41115	14.0003	0.000182779	3.73807	0.140844	0.851262		116.667	146.667	208.667	39.6667	42.6667	11	21.6667	17.3333		117.667	147.667	209.667	40.6667	43.6667	12	22.6667	18.3333
EAY01540	TVAG_217780	0.0744412	-3.74775	3.40625	13.9736	0.000185394	3.73191	0.141073	0.850556		296.667	17.6667	21.3333	1375.33	43.3333	4	62	14.3333	13.8356	297.667	18.6667	22.3333	1376.33	44.3333	5	63	15.3333
EAY01077	TVAG_484510	0.00951684	-6.7153	3.21744	13.9175	0.000191015	3.71893	0.143556	0.842978		0	0.333333	905.667	0.666667	0	0.333333	4	0.333333		1	1.33333	906.667	1.66667	1	1.33333	5	1.33333
EAY06210	TVAG_470530	0.169944	-2.55687	4.5718	13.852	0.000197782	3.70381	0.146829	0.833188		288	402.667	1395.33	181.333	58.3333	44.3333	179	100.333		289	403.667	1396.33	182.333	59.3333	45.3333	180	101.333
EAY00432	TVAG_084690	59.4211	5.8929	1.13919	13.6821	0.000216505	3.66453	0.158792	0.799172		0.666667	0.666667	1	0	0.333333	0.333333	370	1.66667		1.66667	1.66667	2	1	1.33333	1.33333	371	2.66667
EAX99489	TVAG_413070	0.273139	-1.87229	5.07819	13.6422	0.000221154	3.6553	0.160271	0.795145		609	789	1348.67	562.667	172	37.3333	177.333	514.333		610	790	1349.67	563.667	173	38.3333	178.333	515.333
EAY04693	TVAG_474910	0.0713542	-3.80886	2.71753	13.5216	0.000235835	3.62739	0.166936	0.777451		13.3333	3.66667	586.667	32.3333	16	0.333333	19.6667	5.66667		14.3333	4.66667	587.667	33.3333	17	1.33333	20.6667	6.66667
EAY13201	TVAG_097710	0.0601052	-4.05637	2.02729	13.5397	0.000233567	3.63159	0.166936	0.777451		7.33333	417	10	5.33333	12	1.33333	4.33333	5		8.33333	418	11	6.33333	13	2.33333	5.33333	6
EAY15960	TVAG_262100	0.0992908	-3.3322	-1.2466	13.4872	0.000240192	3.61944	0.168065	0.774522		16.6667	0.666667	5.66667	20	0	0	0.666667	0		17.6667	1.66667	6.66667	21	1	1	1.66667	1
EAX97600	TVAG_162060	57.7692	5.85223	0.701672	13.4419	0.000246069	3.60894	0.170221	0.768986		0.333333	0	0	0	246	0.333333	0	0		1.33333	1	1	1	247	1.33333	1	1
EAY04146	TVAG_125860	0.0209677	-5.57568	1.10162	13.391	0.000252828	3.59717	0.172931	0.762126		0	0	202.667	0	0	0	0.333333	0		1	1	203.667	1	1	1	1.33333	1
EAX83738	TVAG_041480	51.7407	5.69323	1.41127	13.3463	0.00025893	3.58682	0.175137	0.756622		0.333333	0	2	2.66667	1.33333	0.333333	2.33333	457.667		1.33333	1	3	3.66667	2.33333	1.33333	3.33333	458.667
EAY04511	TVAG_453290	8.47706	3.08356	3.32704	13.2586	0.000271333	3.5665	0.177607	0.750541		23.3333	14	53	51	219	112.333	875.667	21		24.3333	15	54	52	220	113.333	876.667	22
EAX91183	TVAG_287070	15.9167	3.99247	-0.532335	13.2652	0.000270381	3.56802	0.177607	0.750541		0	0	0	0	42	17.3333	0.333333	0		1	1	1	1	43	18.3333	1.33333	1
EAY03760	TVAG_072530	20.9744	4.39055	3.14147	13.2808	0.000268144	3.57163	0.177607	0.750541		1.33333	16.3333	38.3333	5	1079.67	11	87	181.667		2.33333	17.3333	39.3333	6	1080.67	12	88	182.667
EAY17309	TVAG_266720	12.6905	3.66567	0.309304	13.219	0.000277127	3.55732	0.179469	0.74601		0.666667	0	0	9.33333	20.3333	6.33333	33	114		1.66667	1	1	10.3333	21.3333	7.33333	34	115
EAX98371	TVAG_357400	6.59722	2.72186	0.526942	13.1566	0.000286514	3.54285	0.17981	0.745186		3.33333	1	0.666667	15	41.6667	21.6667	39.6667	51.3333		4.33333	2	1.66667	16	42.6667	22.6667	40.6667	52.3333
EAY13915	TVAG_028680	0.0464481	-4.42824	0.269403	13.1585	0.000286223	3.54329	0.17981	0.745186		0	70.3333	46.3333	1.33333	0	0.333333	1.33333	0		1	71.3333	47.3333	2.33333	1	1.33333	2.33333	1
EAY02346	TVAG_054440	0.0211268	-5.56478	0.785791	13.1885	0.000281673	3.55025	0.17981	0.745186		0	185.333	0	0	0	0	0	0		1	186.333	1	1	1	1	1	1
EAY19031	TVAG_247100	0.106106	-3.23643	6.2088	13.0659	0.000300729	3.52183	0.186805	0.728612		196.333	190.667	6364	326	161	28	98	460.333		197.333	191.667	6365	327	162	29	99	461.333
TVAG_167840	TVAG_167840	5.01257	2.32555	3.14345	12.8761	0.000332807	3.47781	0.196696	0.706206		57	20.3333	17	140.333	375.333	31	519.333	266.667		58	21.3333	18	141.333	376.333	32	520.333	267.667
EAY03148	TVAG_345220	0.0273973	-5.18982	0.683955	12.8805	0.000332017	3.47884	0.196696	0.706206		186.667	4	0	0	0.666667	0	0	0.666667		187.667	5	1	1	1.66667	1	1	1.66667
EAX92544	TVAG_074270	0.0446927	-4.48382	1.68286	12.8872	0.000330837	3.48039	0.196696	0.706206		5	335	0	14	3.33333	0.333333	7.33333	1		6	336	1	15	4.33333	1.33333	8.33333	2
EAY08439	TVAG_354980	12.2429	3.61387	0.985516	12.8913	0.000330113	3.48134	0.196696	0.706206		2.66667	4.33333	1.66667	10.6667	225	3.33333	41.6667	11.6667		3.66667	5.33333	2.66667	11.6667	226	4.33333	42.6667	12.6667
EAY03126	TVAG_328990	104.417	6.70621	6.50941	12.9358	0.000322354	3.49167	0.196696	0.706206		24.6667	0	1.66667	5.66667	0	3747.67	0.666667	6.66667		25.6667	1	2.66667	6.66667	1	3748.67	1.66667	7.66667
EAX79595	TVAG_473690	0.10233	-3.28869	3.30902	12.8208	0.000342786	3.46498	0.200645	0.697571		4	73.6667	779	126.333	14	4	66	13		5	74.6667	780	127.333	15	5	67	14
EAX93943	TVAG_307220	9.6502	3.27056	4.61152	12.7765	0.000350998	3.4547	0.203495	0.691446		148	20	17	60.6667	42	512	1769.33	82		149	21	18	61.6667	43	513	1770.33	83
EAX72342	TVAG_244160	0.027146	-5.20312	1.36669	12.7229	0.000361211	3.44224	0.207441	0.683106		2.33333	6.66667	0.666667	440.667	1.66667	1.66667	2.33333	2.66667		3.33333	7.66667	1.66667	441.667	2.66667	2.66667	3.33333	3.66667
EAY20164	TVAG_021090	6.06183	2.59975	2.55703	12.6755	0.000370483	3.43123	0.210777	0.676176		33.3333	12.6667	11.6667	62.3333	551	34	63	99.6667		34.3333	13.6667	12.6667	63.3333	552	35	64	100.667
EAX85574	TVAG_564270	4.16	2.05658	3.85899	12.6303	0.000379537	3.42075	0.213929	0.66973		103	35	94.6667	138.333	553.667	161.333	207	634		104	36	95.6667	139.333	554.667	162.333	208	635
EAY19878	TVAG_129860	0.172833	-2.53255	2.79168	12.519	0.000402825	3.39488	0.224972	0.647871		51	320.667	282	27	13.3333	1	76.3333	23.6667		52	321.667	283	28	14.3333	2	77.3333	24.6667
EAY13379	TVAG_424100	5.55039	2.47259	2.09907	12.4458	0.000418926	3.37786	0.229749	0.638747		3.66667	7.66667	12	58.6667	79.6667	60.3333	39.3333	294		4.66667	8.66667	13	59.6667	80.6667	61.3333	40.3333	295
EAY07640	TVAG_430040	5.65766	2.5002	3.68277	12.4557	0.000416721	3.38015	0.229749	0.638747		24.6667	8.33333	65.3333	119.667	64	239.667	709.333	239		25.6667	9.33333	66.3333	120.667	65	240.667	710.333	240
EAX90574	TVAG_376300	0.0591806	-4.07873	1.21269	12.4033	0.000428583	3.36797	0.232946	0.632745		3.66667	6.66667	204.667	0.666667	2.66667	0.666667	4.66667	1		4.66667	7.66667	205.667	1.66667	3.66667	1.66667	5.66667	2
EAY05716	TVAG_100390	0.058309	-4.10014	0.26876	12.3781	0.000434388	3.36212	0.234012	0.630761		0.666667	12	96	1.66667	0.333333	0.333333	2	0		1.66667	13	97	2.66667	1.33333	1.33333	3	1
EAY05326	TVAG_153600	0.0875912	-3.51307	-1.14576	12.3357	0.000444388	3.35224	0.235236	0.628497		22.6667	18.3333	0	0.666667	0	0	0	0		23.6667	19.3333	1	1.66667	1	1	1	1
EAX73365	TVAG_550840	0.0875399	-3.51391	2.38588	12.3515	0.000440631	3.35592	0.235236	0.628497		10.3333	5	423.333	79	16	4.33333	18	3.33333		11.3333	6	424.333	80	17	5.33333	19	4.33333
EAY18888	TVAG_295410	0.0586767	-4.09107	2.4622	12.2715	0.00045992	3.33732	0.241359	0.617337		3	0.333333	503.667	23	10.6667	1	6.66667	9		4	1.33333	504.667	24	11.6667	2	7.66667	10
EAY06209	TVAG_470520	0.0784103	-3.67281	1.62087	12.2369	0.000468547	3.32925	0.243785	0.612994		0.333333	46.3333	225.667	34	0.333333	0	4	16		1.33333	47.3333	226.667	35	1.33333	1	5	17
EAY05325	TVAG_153590	0.0985915	-3.34239	-1.09286	12.2012	0.000477587	3.32095	0.246382	0.60839		23.3333	17.6667	1	1.33333	0	0	0.333333	0.333333		24.3333	18.6667	2	2.33333	1	1	1.33333	1.33333
EAY02008	TVAG_217450	48.75	5.60733	0.252902	12.1342	0.000495067	3.30534	0.251143	0.600079		0	0	0	0	0	0	191	0		1	1	1	1	1	1	192	1
EAY16233	TVAG_341270	0.0940584	-3.4103	4.06521	12.1359	0.000494608	3.30574	0.251143	0.600079		61	23.3333	1431	68.3333	22.3333	18.3333	48	56.6667		62	24.3333	1432	69.3333	23.3333	19.3333	49	57.6667
EAY08094	TVAG_497170	0.106122	-3.2362	2.57357	12.1136	0.00050056	3.30054	0.251831	0.598891		22	531.667	25.3333	70.3333	50.6667	2.66667	7	5		23	532.667	26.3333	71.3333	51.6667	3.66667	8	6
EAY12791	TVAG_401170	0.0610329	-4.03427	-0.540589	12.0348	0.000522157	3.2822	0.258425	0.587665		0.333333	63.6667	0.666667	2.33333	0	0	0.333333	0		1.33333	64.6667	1.66667	3.33333	1	1	1.33333	1
EAX93652	TVAG_091870	5.85276	2.54912	1.5203	12.0393	0.00052091	3.28324	0.258425	0.587665		12	5	12.3333	21	190	33.6667	17	73.3333		13	6	13.3333	22	191	34.6667	18	74.3333
EAX92135	TVAG_419400	15.3807	3.94305	4.85279	11.9943	0.000533639	3.27275	0.261978	0.581735		16	132.333	7.66667	58	2842.67	402.667	88	15.6667		17	133.333	8.66667	59	2843.67	403.667	89	16.6667
EAX91670	TVAG_277400	6.60518	2.7236	3.40316	11.945	0.000547947	3.26126	0.264732	0.577193		34.3333	25	41.6667	113.667	1086.67	33	99	221.667		35.3333	26	42.6667	114.667	1087.67	34	100	222.667
EAY14661	TVAG_460780	5.01196	2.32537	4.44331	11.9549	0.000545037	3.26357	0.264732	0.577193		89	31.3333	61.6667	399.333	1285	85	558.667	1001		90	32.3333	62.6667	400.333	1286	86	559.667	1002
EAY11633	TVAG_158580	0.072361	-3.78864	3.18548	11.8401	0.000579688	3.23681	0.277862	0.55617		896.333	36.3333	2	236	1.33333	5	45.3333	29.3333		897.333	37.3333	3	237	2.33333	6	46.3333	30.3333
EAY02929	TVAG_040790	0.224138	-2.15754	-2.08949	11.7672	0.000602828	3.21981	0.286697	0.542577		5	1	4.33333	5	0	0.333333	0	0		6	2	5.33333	6	1	1.33333	1	1
EAX89537	TVAG_061430	32.8824	5.03924	0.188279	11.7006	0.000624808	3.20425	0.294846	0.530404		0.333333	0	0.333333	1	0	0	6.66667	175.667		1.33333	1	1.33333	2	1	1	7.66667	176.667
EAX98610	TVAG_339270	0.250056	-1.99967	3.96416	11.6719	0.000634507	3.19756	0.29712	0.527068		173	221	911	168	59.6667	9.66667	94	202		174	222	912	169	60.6667	10.6667	95	203
EAX92989	TVAG_261680	22.2	4.47249	0.0402118	11.6171	0.000653496	3.18476	0.303676	0.51759		0.666667	1.33333	0.333333	0.333333	128.667	0.666667	14.3333	0.333333		1.66667	2.33333	1.33333	1.33333	129.667	1.66667	15.3333	1.33333
EAY19069	TVAG_247480	6.04645	2.59609	6.41915	11.6002	0.000659449	3.18082	0.304121	0.516954		290	242.333	19.3333	1353.33	3307.33	563.667	1301.67	6366		291	243.333	20.3333	1354.33	3308.33	564.667	1302.67	6367
EAX85789	TVAG_408550	0.0233645	-5.41954	0.963116	11.5664	0.000671528	3.17294	0.307363	0.512349		0	210	0	0	0	0.333333	0.333333	0.333333		1	211	1	1	1	1.33333	1.33333	1.33333
EAX88508	TVAG_587490	8.03084	3.00555	2.13214	11.519	0.000688875	3.16186	0.308348	0.510959		16	39.6667	6	10	180.333	17	361.333	45		17	40.6667	7	11	181.333	18	362.333	46
EAY18987	TVAG_246650	0.183391	-2.44701	1.50284	11.5255	0.000686482	3.16337	0.308348	0.510959		14.6667	121.667	98.6667	50	30	0.666667	13.6667	4.66667		15.6667	122.667	99.6667	51	31	1.66667	14.6667	5.66667
EAY05670	TVAG_216460	0.15	-2.73697	0.860268	11.5422	0.000680356	3.16726	0.308348	0.510959		47	85.3333	21	42.6667	2.66667	1	1	21.3333		48	86.3333	22	43.6667	3.66667	2	2	22.3333
EAX85832	TVAG_181740	4.90041	2.2929	5.00791	11.4285	0.000723274	3.1407	0.314495	0.502386		254.667	115.333	27.6667	164	84.3333	699.333	1275.33	709		255.667	116.333	28.6667	165	85.3333	700.333	1276.33	710
EAY06520	TVAG_358100	5.43301	2.44175	2.52462	11.4293	0.000722953	3.14089	0.314495	0.502386		29	16	12.3333	78	487.333	22.6667	56.3333	186.667		30	17	13.3333	79	488.333	23.6667	57.3333	187.667
EAY10662	TVAG_157390	0.117994	-3.08321	-0.00308163	11.451	0.000714543	3.14597	0.314495	0.502386		25.3333	45.6667	7.33333	30.6667	0.333333	0	0.666667	8.33333		26.3333	46.6667	8.33333	31.6667	1.33333	1	1.66667	9.33333
EAY01557	TVAG_217950	0.0930576	-3.42573	1.22855	11.4635	0.000709782	3.14888	0.314495	0.502386		4	3	193.333	21.3333	2.33333	1.66667	6.66667	6.33333		5	4	194.333	22.3333	3.33333	2.66667	7.66667	7.33333
EAX86689	TVAG_300370	12.2	3.60881	-0.87273	11.3761	0.000743969	3.12845	0.321199	0.493225		0	1	0	0	15.3333	7.66667	0	34		1	2	1	1	16.3333	8.66667	1	35
EAY18069	TVAG_305890	3.7843	1.92003	4.08592	11.3513	0.000753942	3.12266	0.323213	0.490511		118.667	69.3333	47.3333	283	997	121.667	462.667	391.333		119.667	70.3333	48.3333	284	998	122.667	463.667	392.333
EAX92823	TVAG_448200	0.0233577	-5.41996	0.424818	11.318	0.000767609	3.11486	0.326771	0.485757		5.33333	0	0	219	0	0.666667	0.333333	0.333333		6.33333	1	1	220	1	1.66667	1.33333	1.33333
EAX91955	TVAG_375820	33.5385	5.06774	0.877572	11.2518	0.000795471	3.09938	0.329417	0.482254		4.33333	0	0.333333	0	173	0	113.333	0.333333		5.33333	1	1.33333	1	174	1	114.333	1.33333
EAX85619	TVAG_036500	0.0555925	-4.16896	3.066	11.2607	0.000791672	3.10145	0.329417	0.482254		757.333	230.667	0	9.33333	4.33333	5	36	6.33333		758.333	231.667	1	10.3333	5.33333	6	37	7.33333
EAY16717	TVAG_067220	0.08	-3.64386	-0.888111	11.2717	0.000786966	3.10404	0.329417	0.482254		15.6667	0	7.33333	39.6667	0	0.333333	0.333333	0.666667		16.6667	1	8.33333	40.6667	1	1.33333	1.33333	1.66667
EAX88159	TVAG_095820	15.8421	3.98569	-0.200531	11.2809	0.00078308	3.10619	0.329417	0.482254		0	0	0	2.33333	0.333333	14.6667	80	1.33333		1	1	1	3.33333	1.33333	15.6667	81	2.33333
EAY01267	TVAG_027350	44.2857	5.46877	0.447052	11.1703	0.000831155	3.08032	0.335077	0.474856		0.333333	0.333333	0	0	202.667	0	0	0		1.33333	1.33333	1	1	203.667	1	1	1
EAY13414	TVAG_424460	13.4146	3.74574	0.303276	11.1715	0.00083065	3.08058	0.335077	0.474856		4	1.66667	0.333333	3.66667	3.66667	3.66667	22	150		5	2.66667	1.33333	4.66667	4.66667	4.66667	23	151
EAX95289	TVAG_270800	0.283824	-1.81693	6.12159	11.185	0.000824609	3.08375	0.335077	0.474856		492.667	2172.67	2864	1040	644.667	117.333	656.667	443		493.667	2173.67	2865	1041	645.667	118.333	657.667	444
EAY08656	TVAG_240170	0.057716	-4.11488	3.13168	11.1948	0.000820274	3.08604	0.335077	0.474856		1019	29	0	28	8.33333	4.66667	22.6667	22.6667		1020	30	1	29	9.33333	5.66667	23.6667	23.6667
EAY21935	TVAG_249950	27.0857	4.75946	1.05091	11.0851	0.00087022	3.06037	0.343991	0.463452		3	0.666667	2	2	307.333	0.333333	1	3.33333		4	1.66667	3	3	308.333	1.33333	2	4.33333
EAX98691	TVAG_333550	0.0980861	-3.34981	2.12578	11.0854	0.000870089	3.06044	0.343991	0.463452		11.3333	8.66667	366.333	27.6667	0.333333	3	19	14.6667		12.3333	9.66667	367.333	28.6667	1.33333	4	20	15.6667
EAX96331	TVAG_148330	7.66429	2.93815	2.22949	11.0972	0.000864572	3.0632	0.343991	0.463452		9	14.6667	0.666667	65	98	6.66667	392	214.667		10	15.6667	1.66667	66	99	7.66667	393	215.667
EAY07043	TVAG_311680	0.266755	-1.90641	2.36951	11.0549	0.000884519	3.05329	0.347388	0.459186		172.667	78.3333	192	55.3333	30.3333	5.33333	78.6667	15.6667		173.667	79.3333	193	56.3333	31.3333	6.33333	79.6667	16.6667
EAX97280	TVAG_025160	6.06349	2.60015	1.52556	10.9348	0.000943729	3.02515	0.361318	0.442111		13.6667	16.6667	11	17.6667	189	8	138.333	42.6667		14.6667	17.6667	12	18.6667	190	9	139.333	43.6667
EAY04530	TVAG_244310	10.2857	3.36257	-1.18649	10.9363	0.00094299	3.02549	0.361318	0.442111		0	0.333333	0	0.333333	34.6667	4.33333	0	5		1	1.33333	1	1.33333	35.6667	5.33333	1	6
EAY02126	TVAG_372710	7.00602	2.8086	1.58103	10.942	0.000940061	3.02684	0.361318	0.442111		21	0.333333	0.666667	29.3333	36.6667	26	178.667	142.333		22	1.33333	1.66667	30.3333	37.6667	27	179.667	143.333
EAY13050	TVAG_212320	3.67548	1.87793	3.34808	10.9443	0.000938901	3.02738	0.361318	0.442111		63.3333	75.6667	52	132.667	416	55	509.667	219.667		64.3333	76.6667	53	133.667	417	56	510.667	220.667
EAX98919	TVAG_242840	0.154454	-2.69475	2.61788	10.9077	0.000957658	3.01879	0.362096	0.441176		41	499.333	68.3333	19.6667	62	2	19	10.6667		42	500.333	69.3333	20.6667	63	3	20	11.6667
EAY15441	TVAG_252540	0.166667	-2.58496	0.836822	10.9108	0.000956054	3.01952	0.362096	0.441176		112	9	34	39	13.3333	0.666667	10.6667	4.33333		113	10	35	40	14.3333	1.66667	11.6667	5.33333
EAY19453	TVAG_101710	9.72727	3.28204	1.10106	10.8507	0.000987565	3.00543	0.366573	0.435839		11.3333	0.333333	0.666667	9.33333	3	32.6667	185.667	24.3333		12.3333	1.33333	1.66667	10.3333	4	33.6667	186.667	25.3333
EAY01085	TVAG_484590	0.138243	-2.85472	1.2674	10.8527	0.000986512	3.0059	0.366573	0.435839		14.6667	189.667	8	41.6667	7.66667	3.33333	10	10.6667		15.6667	190.667	9	42.6667	8.66667	4.33333	11	11.6667
EAY01335	TVAG_407640	14.1765	3.82543	1.07757	10.8582	0.000983583	3.00719	0.366573	0.435839		1.33333	3.66667	0.666667	13	188.333	2	1	126		2.33333	4.66667	1.66667	14	189.333	3	2	127
EAY18408	TVAG_046110	0.0402685	-4.63421	-0.0895927	10.8065	0.00101145	2.99505	0.373165	0.428099		0	95.3333	0	0	0	0	0	0		1	96.3333	1	1	1	1	1	1
EAX89382	TVAG_121260	7	2.80735	-1.52945	10.7758	0.00102834	2.98786	0.37711	0.423531		0	0	0	0	0.666667	9.66667	13.6667	0		1	1	1	1	1.66667	10.6667	14.6667	1
EAX90885	TVAG_TEG_DS114076_2_2	16.2667	4.02385	-0.785351	10.7181	0.00106094	2.97431	0.377689	0.422866		1	0	0	0	0	1	34.6667	41.6667		2	1	1	1	1	2	35.6667	42.6667
EAX86725	TVAG_223060	0.320929	-1.63967	3.91124	10.723	0.0010581	2.97548	0.377689	0.422866		339.333	532.333	152.667	593	87.6667	15.3333	257.333	156		340.333	533.333	153.667	594	88.6667	16.3333	258.333	157
EAY16802	TVAG_447610	0.0370899	-4.75283	1.29223	10.7391	0.00104897	2.97924	0.377689	0.422866		0	0.333333	229.333	0	1	0.333333	1.66667	1.66667		1	1.33333	230.333	1	2	1.33333	2.66667	2.66667
EAX97608	TVAG_162140	6.36538	2.67025	1.22915	10.7505	0.00104251	2.98192	0.377689	0.422866		11	2	1	16.6667	2.33333	51.6667	73	89.6667		12	3	2	17.6667	3.33333	52.6667	74	90.6667
EAY18575	TVAG_462610	0.149897	-2.73795	0.535734	10.7552	0.00103985	2.98303	0.377689	0.422866		71.3333	23.6667	24.6667	38.6667	11.3333	0.333333	0	8.66667		72.3333	24.6667	25.6667	39.6667	12.3333	1.33333	1	9.66667
EAY15830	TVAG_160030	11.7756	3.55773	2.00041	10.6784	0.00108394	2.96499	0.381417	0.4186		11.6667	1	3.33333	32	429	1.66667	166.667	11		12.6667	2	4.33333	33	430	2.66667	167.667	12
EAX89647	TVAG_195010	0.207533	-2.26859	4.04393	10.6799	0.00108308	2.96534	0.381417	0.4186		441.667	1129	71.3333	71	63.3333	8.66667	166	114.333		442.667	1130	72.3333	72	64.3333	9.66667	167	115.333
EAX83508	TVAG_231910	0.0518205	-4.27033	4.26549	10.6224	0.00111723	2.95186	0.390871	0.407966		2213.33	0.333333	43	183.667	1.33333	2.66667	96	22.6667		2214.33	1.33333	44	184.667	2.33333	3.66667	97	23.6667
EAY16196	TVAG_340900	0.0808271	-3.62902	0.904834	10.5611	0.0011549	2.93746	0.397201	0.400989		0	24	144.667	4.66667	1	1.33333	4	4		1	25	145.667	5.66667	2	2.33333	5	5
EAY11118	TVAG_358970	45.0455	5.49331	1.92448	10.5692	0.00114989	2.93934	0.397201	0.400989		1	2.33333	0	7.33333	0	1	655.333	0.333333		2	3.33333	1	8.33333	1	2	656.333	1.33333
EAY19975	TVAG_402300	5.40382	2.43398	3.18035	10.5739	0.00114698	2.94045	0.397201	0.400989		11.6667	45.3333	45	121	685	22.6667	225.333	289.667		12.6667	46.3333	46	122	686	23.6667	226.333	290.667
EAX87203	TVAG_057580	3.58423	1.84167	2.81697	10.5381	0.00116938	2.93204	0.399921	0.398026		32.6667	17	7.66667	154.333	192.667	78	243.667	254.667		33.6667	18	8.66667	155.333	193.667	79	244.667	255.667
EAY08130	TVAG_302170	0.164083	-2.60751	4.70943	10.5142	0.00118459	2.92643	0.402859	0.394847		85	2081	237.667	430.333	22.6667	13	57.6667	368.333		86	2082	238.667	431.333	23.6667	14	58.6667	369.333
EAY20699	TVAG_163950	0.0223917	-5.48089	5.85136	10.4979	0.00119513	2.92258	0.404187	0.393418		12	19.3333	17.3333	10784.7	140.333	37.3333	25.3333	35.6667		13	20.3333	18.3333	10785.7	141.333	38.3333	26.3333	36.6667
EAY12805	TVAG_221580	5.43444	2.44213	4.18186	10.4568	0.00122201	2.91292	0.410995	0.386163		56.6667	56.6667	31.3333	21.6667	85	629.667	199.667	7.33333		57.6667	57.6667	32.3333	22.6667	86	630.667	200.667	8.33333
EAY07379	TVAG_204860	0.045283	-4.46489	-0.245052	10.4448	0.00122996	2.91011	0.411394	0.385742		0	84.3333	0	0	0	0	0	0		1	85.3333	1	1	1	1	1	1
EAY22497	TVAG_035200	0.0669856	-3.9	0.555601	10.4105	0.00125299	2.90205	0.416809	0.380063		0.666667	0.666667	128.667	5.33333	0	0.333333	3	2		1.66667	1.66667	129.667	6.33333	1	1.33333	4	3
EAX96083	TVAG_063860	0.097561	-3.35755	-1.11943	10.3918	0.00126573	2.89766	0.418758	0.378037		0	8	29	0	0	0	0	0		1	9	30	1	1	1	1	1
EAY14215	TVAG_373480	0.153489	-2.70379	5.72636	10.3267	0.00131122	2.88233	0.42233	0.374348		37.6667	1333	3457.67	197.333	433.333	31.3333	206	97.3333		38.6667	1334	3458.67	198.333	434.333	32.3333	207	98.3333
EAY15914	TVAG_165420	3.74242	1.90397	3.20678	10.3286	0.00130988	2.88277	0.42233	0.374348		122.667	28.3333	35.3333	95.6667	426.667	59.6667	349.333	230.667		123.667	29.3333	36.3333	96.6667	427.667	60.6667	350.333	231.667
EAY08326	TVAG_352480	12.1538	3.60334	0.100064	10.3373	0.00130369	2.88483	0.42233	0.374348		0	0	0.333333	0	0	48.6667	0	0		1	1	1.33333	1	1	49.6667	1	1
EAY19256	TVAG_214810	0.0585366	-4.09452	0.531346	10.353	0.00129264	2.88852	0.42233	0.374348		0	0.333333	129.667	2.66667	1	0	2.33333	0.666667		1	1.33333	130.667	3.66667	2	1	3.33333	1.66667
EAY09700	TVAG_098350	0.316396	-1.6602	3.29151	10.3624	0.00128606	2.89074	0.42233	0.374348		91	133.667	401.333	354	58.3333	14	89.6667	145.333		92	134.667	402.333	355	59.3333	15	90.6667	146.333
EAY11264	TVAG_061680	4.82353	2.27009	3.2872	10.3077	0.00132475	2.87787	0.424443	0.372181		38.3333	27.3333	48.6667	159.333	427.667	19.3333	640	248.333		39.3333	28.3333	49.6667	160.333	428.667	20.3333	641	249.333
EAY18587	TVAG_462730	28.7037	4.84316	0.780931	10.2859	0.00134049	2.87273	0.427239	0.369329		0	0	2.66667	2.33333	251	1	0.666667	1.66667		1	1	3.66667	3.33333	252	2	1.66667	2.66667
EAY13526	TVAG_343550	0.264502	-1.91865	3.70959	10.2288	0.00138261	2.8593	0.42942	0.367118		424.333	379.333	245.667	291.333	242.667	21.6667	27.6667	59.6667		425.333	380.333	246.667	292.333	243.667	22.6667	28.6667	60.6667
EAX94694	TVAG_321310	0.266667	-1.90689	-2.35586	10.2379	0.00137581	2.86144	0.42942	0.367118		1.33333	5.66667	0	4	0	0	0	0		2.33333	6.66667	1	5	1	1	1	1
EAX91295	TVAG_397960	0.0821444	-3.60569	2.85018	10.2412	0.00137335	2.86222	0.42942	0.367118		13.6667	650.333	95.6667	7.33333	26.6667	0	32.6667	0		14.6667	651.333	96.6667	8.33333	27.6667	1	33.6667	1
EAX81508	TVAG_091710	0.0703518	-3.82927	0.296585	10.2466	0.00136938	2.86347	0.42942	0.367118		16.3333	104	0	8.33333	0.666667	0.666667	4	0		17.3333	105	1	9.33333	1.66667	1.66667	5	1
EAX91906	TVAG_326500	0.0447284	-4.48266	-0.155222	10.263	0.00135723	2.86735	0.42942	0.367118		99.3333	0	0	1	0	0	0.666667	0		100.333	1	1	2	1	1	1.66667	1
EAX87204	TVAG_057590	3.26521	1.70717	4.05538	10.2066	0.00139941	2.85405	0.432432	0.364082		67	61.3333	33.6667	382	412.333	180.667	616	576.333		68	62.3333	34.6667	383	413.333	181.667	617	577.333
EAY08200	TVAG_308060	3.10012	1.63232	3.99728	10.1543	0.00143966	2.84174	0.442623	0.353966		100.667	72	107.667	265	492	141	498.667	567.333		101.667	73	108.667	266	493	142	499.667	568.333
EAX85729	TVAG_576580	0.112474	-3.15233	0.807918	10.1362	0.00145386	2.83748	0.444743	0.351891		4.66667	5	145.667	3.66667	5.33333	0	6	3		5.66667	6	146.667	4.66667	6.33333	1	7	4
EAY05701	TVAG_005450	0.233352	-2.09942	4.64488	10.1223	0.00146489	2.83419	0.445876	0.350786		92	220.667	1655	391	106	29.3333	128.667	283.333		93	221.667	1656	392	107	30.3333	129.667	284.333
EAY15829	TVAG_160020	10.963	3.45458	3.4483	10.1037	0.00147974	2.82981	0.448156	0.348571		40.6667	3.33333	27	78.3333	1161.33	3.66667	478	34		41.6667	4.33333	28	79.3333	1162.33	4.66667	479	35
EAX87387	TVAG_086980	17.4359	4.12399	3.92115	10.094	0.00148751	2.82754	0.448277	0.348454		63.6667	6	1.33333	55	2188	41.6667	20.6667	12.3333		64.6667	7	2.33333	56	2189	42.6667	21.6667	13.3333
EAY04694	TVAG_474920	0.0643777	-3.9573	-0.795706	10.0651	0.00151102	2.82073	0.4509	0.34592		0	14.3333	0.666667	58.6667	0	0	0	1		1	15.3333	1.66667	59.6667	1	1	1	2
EAX85975	TVAG_334740	3.56918	1.83559	3.65535	10.0694	0.00150749	2.82175	0.4509	0.34592		60	60	45	255	271.333	79	803.333	355.667		61	61	46	256	272.333	80	804.333	356.667
EAX82766	TVAG_001030	16	4	-1.09575	10.0204	0.00154814	2.81019	0.459721	0.337506		0	0	0	0	0.333333	0	59	0.666667		1	1	1	1	1.33333	1	60	1.66667
EAY15879	TVAG_165070	0.311992	-1.68042	4.16646	9.98959	0.00157428	2.80292	0.465215	0.332346		234.333	544.333	710.333	147	176.667	29.3333	194	107.667		235.333	545.333	711.333	148	177.667	30.3333	195	108.667
EAY02131	TVAG_007660	0.112245	-3.15528	2.15322	9.96026	0.00159955	2.796	0.465899	0.331709		8	349	18.3333	110.667	12	11.3333	10.3333	17.3333		9	350	19.3333	111.667	13	12.3333	11.3333	18.3333
EAX79352	TVAG_542940	0.0705882	-3.82443	-0.823189	9.96029	0.00159953	2.79601	0.465899	0.331709		0	52	0	0.666667	0	0	0	0		1	53	1	1.66667	1	1	1	1
EAY05894	TVAG_353340	0.218033	-2.19738	1.9079	9.97681	0.00158524	2.79991	0.465899	0.331709		11.6667	113	100.333	177.667	21	9.33333	27.3333	27		12.6667	114	101.333	178.667	22	10.3333	28.3333	28
EAY05487	TVAG_080790	8.46377	3.0813	1.39161	9.94107	0.00161632	2.79147	0.46854	0.329254		7	2.33333	1	31.6667	237.333	1	50.3333	96.6667		8	3.33333	2	32.6667	238.333	2	51.3333	97.6667
EAY23244	TVAG_185510	4.6259	2.20973	1.98881	9.92677	0.00162892	2.7881	0.469955	0.327944		20	1.66667	6	14.6667	3.66667	139.333	19.3333	48		21	2.66667	7	15.6667	4.66667	140.333	20.3333	49
EAY23532	TVAG_070125	15.3684	3.9419	-0.482415	9.90538	0.00164796	2.78305	0.470985	0.326993		0.666667	0.333333	0	1.33333	88.3333	0.333333	2.66667	2		1.66667	1.33333	1	2.33333	89.3333	1.33333	3.66667	3
EAY21159	TVAG_283290	3.84816	1.94417	2.74515	9.91237	0.00164172	2.7847	0.470985	0.326993		32	51.6667	38.6667	91	266.667	21.6667	277.667	266.333		33	52.6667	39.6667	92	267.667	22.6667	278.667	267.333
EAY22441	TVAG_379200	0.0897149	-3.47851	5.26447	9.89674	0.00165571	2.78101	0.470989	0.326989		85.6667	100	3272.33	116	94.3333	71	118.667	33		86.6667	101	3273.33	117	95.3333	72	119.667	34
EAY10981	TVAG_446830	0.171053	-2.54749	-1.74161	9.8337	0.00171343	2.76613	0.48067	0.318153		0.333333	15	5.33333	0.666667	0	0	0.333333	0		1.33333	16	6.33333	1.66667	1	1	1.33333	1
EAX83432	TVAG_466540	0.0578947	-4.11042	0.43704	9.8343	0.00171287	2.76627	0.48067	0.318153		0.666667	0.333333	121	0.666667	2	0.333333	1	0		1.66667	1.33333	122	1.66667	3	1.33333	2	1
EAX84644	TVAG_420740	0.0286299	-5.12634	0.890509	9.83706	0.0017103	2.76693	0.48067	0.318153		3.66667	0	0	318.333	0	0	3.66667	1.66667		4.66667	1	1	319.333	1	1	4.66667	2.66667
EAX94735	TVAG_480160	0.234858	-2.09014	6.69944	9.78886	0.00175572	2.75555	0.485815	0.313529		378	1380	6683	1131	577.333	169	366.667	1132		379	1381	6684	1132	578.333	170	367.667	1133
EAX94286	TVAG_057870	6.59091	2.72048	-1.27976	9.79557	0.00174933	2.75713	0.485815	0.313529		0.666667	0	0	2.66667	11	1	21.3333	11		1.66667	1	1	3.66667	12	2	22.3333	12
EAX95798	TVAG_354100	0.245719	-2.02492	6.32656	9.80109	0.00174409	2.75843	0.485815	0.313529		2798.33	3929.67	448	956.667	659.667	213	735.667	387		2799.33	3930.67	449	957.667	660.667	214	736.667	388
EAY03559	TVAG_042110	0.0380952	-4.71425	0.520386	9.76001	0.00178349	2.74873	0.491267	0.308683		0.666667	0.666667	0.333333	239.333	2.33333	0	0.666667	2.33333		1.66667	1.66667	1.33333	240.333	3.33333	1	1.66667	3.33333
EAY17737	TVAG_170510	3.07829	1.62213	3.25525	9.74209	0.00180096	2.7445	0.493844	0.30641		28	69.6667	61.3333	118	344.333	140	230	146.667		29	70.6667	62.3333	119	345.333	141	231	147.667
EAX89370	TVAG_439900	3.6015	1.8486	3.21662	9.70592	0.00183675	2.73595	0.496943	0.303693		48.3333	22.6667	33.6667	203.333	350.667	54	508	207		49.3333	23.6667	34.6667	204.333	351.667	55	509	208
EAY05619	TVAG_263890	7.81007	2.96534	4.64906	9.70824	0.00183444	2.7365	0.496943	0.303693		23.3333	183.333	5.66667	273.333	870.667	38	2118	793.667		24.3333	184.333	6.66667	274.333	871.667	39	2119	794.667
EAY08587	TVAG_191100	0.084144	-3.571	2.49514	9.71592	0.00182679	2.73831	0.496943	0.303693		640.333	4	2.66667	34.3333	2	3	26.6667	22		641.333	5	3.66667	35.3333	3	4	27.6667	23
EAX90822	TVAG_455500	5.86667	2.55254	-1.77797	9.68272	0.00186009	2.73047	0.501031	0.300136		1	0	0	0	0.666667	2	12.3333	10.3333		2	1	1	1	1.66667	3	13.3333	11.3333
EAY18887	TVAG_295400	0.0662722	-3.91545	1.54406	9.65566	0.00188769	2.72407	0.504006	0.297564		0.666667	0	255.667	21.3333	5	2	6.33333	1.33333		1.66667	1	256.667	22.3333	6	3	7.33333	2.33333
EAY07017	TVAG_174870	8.95209	3.16222	5.10268	9.65827	0.00188501	2.72469	0.504006	0.297564		63.6667	45.6667	39.6667	396.667	22.6667	234.667	4465	194.333		64.6667	46.6667	40.6667	397.667	23.6667	235.667	4466	195.333
EAX99918	TVAG_159380	3.39845	1.76488	3.56431	9.64477	0.00189891	2.7215	0.504787	0.296892		77.3333	30.3333	14.6667	46	35.6667	399.333	81.6667	65		78.3333	31.3333	15.6667	47	36.6667	400.333	82.6667	66
EAY15598	TVAG_208770	0.277665	-1.84858	3.6616	9.61594	0.00192896	2.71468	0.510546	0.291965		89.6667	194.667	716.333	143	75	24.6667	70.6667	144.333		90.6667	195.667	717.333	144	76	25.6667	71.6667	145.333
EAX85347	TVAG_385460	0.096	-3.38082	-1.5799	9.59279	0.00195343	2.7092	0.514783	0.288376		1	0	0.333333	36.3333	0	0	0	0		2	1	1.33333	37.3333	1	1	1	1
EAY20625	TVAG_163210	0.398578	-1.32707	3.07496	9.58178	0.00196518	2.7066	0.515647	0.287647		267.333	212.667	174.333	138.667	112.333	9.66667	100.667	91		268.333	213.667	175.333	139.667	113.333	10.6667	101.667	92
EAY02578	TVAG_254790	0.178082	-2.48938	-1.90719	9.54233	0.00200786	2.69727	0.522345	0.282043		0	11.3333	0.666667	8.33333	0.333333	0	0	0		1	12.3333	1.66667	9.33333	1.33333	1	1	1
EAX99699	TVAG_468690	7.4	2.88753	0.83193	9.54837	0.00200127	2.69869	0.522345	0.282043		6.66667	2.33333	0.666667	4.66667	0.333333	53.3333	74	4		7.66667	3.33333	1.66667	5.66667	1.33333	54.3333	75	5
EAX91894	TVAG_058090	19.5833	4.29155	-0.882689	9.5336	0.00201744	2.6952	0.522603	0.281828		0	0	0	0	0.333333	0	0	74		1	1	1	1	1.33333	1	1	75
EAY09820	TVAG_259010	9.37778	3.22925	0.0966652	9.47922	0.00207812	2.68233	0.536041	0.270802		1.66667	1.66667	4	3.66667	103	3	23.6667	7		2.66667	2.66667	5	4.66667	104	4	24.6667	8
EAX91907	TVAG_326510	0.0479339	-4.38281	0.749313	9.39874	0.00217135	2.66327	0.546203	0.262646		195.667	0	0	2	0.666667	0.333333	2.66667	2		196.667	1	1	3	1.66667	1.33333	3.66667	3
EAY19454	TVAG_101720	4.82353	2.27009	-1.8573	9.40112	0.00216853	2.66383	0.546203	0.262646		0.333333	0	0.333333	1	7.66667	0.666667	11	4		1.33333	1	1.33333	2	8.66667	1.66667	12	5
EAY12120	TVAG_301370	15.34	3.93923	1.73787	9.4024	0.00216702	2.66414	0.546203	0.262646		1.33333	0	1	27	458	2	2.33333	45		2.33333	1	2	28	459	3	3.33333	46
EAY14969	TVAG_396990	0.102749	-3.28281	2.2479	9.41714	0.00214967	2.66763	0.546203	0.262646		63.3333	428	0.333333	13.6667	26.6667	4.33333	7.33333	10		64.3333	429	1.33333	14.6667	27.6667	5.33333	8.33333	11
EAY02681	TVAG_406580	0.0376648	-4.73064	0.559455	9.42734	0.00213774	2.67005	0.546203	0.262646		172.667	0	0	0.333333	1.66667	0	1	0		173.667	1	1	1.33333	2.66667	1	2	1
EAY20326	TVAG_193020	0.0732601	-3.77083	-0.246989	9.43177	0.00213259	2.67109	0.546203	0.262646		1.33333	73.3333	0	12.3333	2.33333	0	0.333333	0		2.33333	74.3333	1	13.3333	3.33333	1	1.33333	1
EAX90940	TVAG_274310	0.130435	-2.9386	-1.52926	9.35075	0.00222894	2.6519	0.54934	0.260159		0	20.3333	6.33333	0	0	0	0	0		1	21.3333	7.33333	1	1	1	1	1
EAY05122	TVAG_108560	13.5111	3.75607	2.30214	9.35238	0.00222696	2.65229	0.54934	0.260159		32.3333	2.66667	0.333333	5.66667	1	69.3333	518	15.6667		33.3333	3.66667	1.33333	6.66667	2	70.3333	519	16.6667
EAY00918	TVAG_168490	5.03642	2.3324	2.90491	9.3552	0.00222353	2.65296	0.54934	0.260159		3.33333	0	5.33333	88	142.667	225	9	126.333		4.33333	1	6.33333	89	143.667	226	10	127.333
EAX87274	TVAG_058920	0.115385	-3.11548	-1.54578	9.36996	0.0022057	2.65645	0.54934	0.260159		25.3333	0	0	5.33333	0	0	0	0		26.3333	1	1	6.33333	1	1	1	1
EAX98370	TVAG_357390	2.83402	1.50285	3.56121	9.37541	0.00219915	2.65775	0.54934	0.260159		58.6667	46.3333	78.3333	216.333	229	146	339.333	425.667		59.6667	47.3333	79.3333	217.333	230	147	340.333	426.667
EAY21182	TVAG_283510	8.33962	3.05998	0.987178	9.29807	0.00229395	2.63942	0.556351	0.254651		6	5	4.33333	16	75.6667	0	177.667	37.3333		7	6	5.33333	17	76.6667	1	178.667	38.3333
EAY12590	TVAG_154410	0.302469	-1.72514	5.94557	9.3053	0.00228491	2.64113	0.556351	0.254651		434.333	1113.67	3497	581.333	437.667	43.6667	328.667	889		435.333	1114.67	3498	582.333	438.667	44.6667	329.667	890
EAY22482	TVAG_035050	17.3636	4.118	-0.141317	9.3054	0.0022848	2.64115	0.556351	0.254651		0	0	1	2.33333	0.333333	5	117.333	0.666667		1	1	2	3.33333	1.33333	6	118.333	1.66667
EAX88041	TVAG_207260	18.5882	4.21632	-0.513229	9.30635	0.00228361	2.64138	0.556351	0.254651		0	0	0	1.66667	0	0	19.6667	81.6667		1	1	1	2.66667	1	1	20.6667	82.6667
EAY01755	TVAG_111120	5.66667	2.5025	-1.70923	9.28176	0.00231447	2.63555	0.5591	0.252511		0	0	0	0	0	9.33333	0	9.33333		1	1	1	1	1	10.3333	1	10.3333
EAY11281	TVAG_061850	0.219966	-2.18465	1.03153	9.27149	0.00232749	2.63311	0.560023	0.251794		19	98.6667	60.3333	15	16.3333	1	18	4		20	99.6667	61.3333	16	17.3333	2	19	5
EAX97888	TVAG_489945	0.157303	-2.66838	-1.5326	9.23125	0.00237919	2.62357	0.570209	0.243966		0.333333	12.3333	12.3333	0.666667	0.666667	0	0	0		1.33333	13.3333	13.3333	1.66667	1.66667	1	1	1
EAY00916	TVAG_168470	4.95903	2.31006	3.44555	9.1945	0.00242744	2.61485	0.572753	0.242033		87	0.666667	21.3333	147.333	638.333	101	191.667	356		88	1.66667	22.3333	148.333	639.333	102	192.667	357
EAY00238	TVAG_449740	0.146585	-2.77019	5.73279	9.19775	0.00242313	2.61562	0.572753	0.242033		14.3333	778	4092.33	80	335.333	15.6667	211.667	161.667		15.3333	779	4093.33	81	336.333	16.6667	212.667	162.667
EAX97828	TVAG_411900	4.40323	2.13856	1.28104	9.19939	0.00242096	2.61601	0.572753	0.242033		16.3333	7	9	25.6667	53	24	165.667	26.3333		17.3333	8	10	26.6667	54	25	166.667	27.3333
EAY13775	TVAG_467900	0.119449	-3.06554	0.926619	9.20373	0.00241522	2.61704	0.572753	0.242033		66	77.3333	7	63.3333	15.3333	4.33333	0.666667	1.66667		67	78.3333	8	64.3333	16.3333	5.33333	1.66667	2.66667
EAY15846	TVAG_160190	0.291185	-1.77999	3.72402	9.1634	0.00246904	2.60747	0.578087	0.238007		194.333	122	699	190.667	52	32.6667	102.667	161		195.333	123	700	191.667	53	33.6667	103.667	162
EAY14430	TVAG_426230	26.619	4.73439	0.227102	9.16993	0.00246024	2.60902	0.578087	0.238007		0	3	0	0	2.66667	0	176.333	3.33333		1	4	1	1	3.66667	1	177.333	4.33333
EAY20297	TVAG_192730	3.75	1.90689	-2.22414	9.13484	0.00250788	2.60069	0.580483	0.23621		0	0	0	0	0	4.66667	0.333333	6		1	1	1	1	1	5.66667	1.33333	7
EAY14056	TVAG_478810	0.313131	-1.67516	2.73904	9.14092	0.00249956	2.60214	0.580483	0.23621		54.3333	185.667	264	119	56	10.3333	20.3333	105.667		55.3333	186.667	265	120	57	11.3333	21.3333	106.667
EAY11117	TVAG_358960	35.6	5.15381	0.825564	9.14231	0.00249766	2.60247	0.580483	0.23621		0	0	0	4.33333	0	0.333333	292	0.333333		1	1	1	5.33333	1	1.33333	293	1.33333
EAX77693	TVAG_386960	0.235294	-2.08746	-2.20641	9.12761	0.00251781	2.59898	0.580574	0.236143		0.333333	10.3333	0	2.33333	0	0	0	0		1.33333	11.3333	1	3.33333	1	1	1	1
EAY10389	TVAG_109730	0.344797	-1.53618	6.15401	9.04931	0.00262794	2.58038	0.596925	0.22408		1585.67	1727.67	2319	818.667	472.667	218	596.667	934.333		1586.67	1728.67	2320	819.667	473.667	219	597.667	935.333
EAX94477	TVAG_458080	0.27215	-1.87753	4.47287	9.05261	0.00262319	2.58117	0.596925	0.22408		170.667	311.667	1394.33	166	111.667	5.33333	99	337		171.667	312.667	1395.33	167	112.667	6.33333	100	338
EAY08240	TVAG_404080	4.64297	2.21505	2.91255	9.06264	0.00260885	2.58355	0.596925	0.22408		65.6667	37	53	56	187.667	15.3333	428	366.333		66.6667	38	54	57	188.667	16.3333	429	367.333
EAX89518	TVAG_372300	15.4545	3.94996	0.522657	9.06777	0.00260154	2.58477	0.596925	0.22408		1	0	0.333333	9.33333	17	0.333333	202.667	2.66667		2	1	1.33333	10.3333	18	1.33333	203.667	3.66667
EAY14672	TVAG_460890	0.200526	-2.31814	6.78605	8.96152	0.00275726	2.55952	0.608145	0.215993		1069	880.333	7025.33	1036.67	535.667	367	670	431.667		1070	881.333	7026.33	1037.67	536.667	368	671	432.667
EAY22953	TVAG_077000	0.0650069	-3.94326	2.73892	8.96715	0.00274877	2.56086	0.608145	0.215993		10	688.333	0.333333	20.3333	4.33333	9	8.33333	21.3333		11	689.333	1.33333	21.3333	5.33333	10	9.33333	22.3333
EAY19837	TVAG_129450	0.345663	-1.53256	2.53186	8.97414	0.00273828	2.56252	0.608145	0.215993		100.667	177.667	167.333	73	37.3333	17.3333	52.3333	69.6667		101.667	178.667	168.333	74	38.3333	18.3333	53.3333	70.6667
EAX99132	TVAG_115360	0.12465	-3.00405	1.15773	8.97919	0.00273072	2.56372	0.608145	0.215993		24	197	1.66667	11.3333	4.66667	0	1.33333	19.6667		25	198	2.66667	12.3333	5.66667	1	2.33333	20.6667
EAX83003	TVAG_572990	22.8462	4.51388	-0.489317	8.98397	0.00272358	2.56486	0.608145	0.215993		0	0.333333	0	0	95	0	0	0		1	1.33333	1	1	96	1	1	1
EAY02595	TVAG_254960	14.5	3.85798	-1.12527	8.98447	0.00272284	2.56498	0.608145	0.215993		0	0	0	0	53.6667	0	0.333333	0		1	1	1	1	54.6667	1	1.33333	1
EAY21189	TVAG_283580	4.63704	2.2132	1.69368	8.98714	0.00271886	2.56561	0.608145	0.215993		0.666667	15.6667	16.6667	8	52.6667	96	14.3333	41.6667		1.66667	16.6667	17.6667	9	53.6667	97	15.3333	42.6667
EAX95129	TVAG_385170	10.4167	3.38082	-1.56716	9.00288	0.00269555	2.56935	0.608145	0.215993		0	0	0	0	0	0	1.66667	36		1	1	1	1	1	1	2.66667	37
EAX92474	TVAG_331500	3.00552	1.58761	3.67735	8.93757	0.00279364	2.55383	0.611738	0.213435		141.333	71.6667	58	148	178	146.667	635.667	307		142.333	72.6667	59	149	179	147.667	636.667	308
EAY17277	TVAG_266400	0.18734	-2.41627	2.6411	8.94247	0.00278616	2.55499	0.611738	0.213435		259	295.667	77.6667	16.6667	14.3333	2	99.6667	2.33333		260	296.667	78.6667	17.6667	15.3333	3	100.667	3.33333
EAX90634	TVAG_437780	0.297043	-1.75126	1.32817	8.86435	0.00290794	2.53641	0.614655	0.211368		76.6667	60.3333	57.3333	49.6667	14.6667	3.33333	9	42.6667		77.6667	61.3333	58.3333	50.6667	15.6667	4.33333	10	43.6667
EAY03147	TVAG_345210	0.08	-3.64386	-1.07758	8.86667	0.00290424	2.53697	0.614655	0.211368		45.6667	0.333333	0	0	0	0	0	0		46.6667	1.33333	1	1	1	1	1	1
EAX90356	TVAG_435090	7.30769	2.86942	-1.81184	8.86815	0.0029019	2.53732	0.614655	0.211368		0	0	0	0.333333	0	0.333333	3	24.3333		1	1	1	1.33333	1	1.33333	4	25.3333
EAY04203	TVAG_298210	11.1006	3.47257	2.13805	8.8793	0.00288422	2.53997	0.614655	0.211368		26.3333	1.66667	0	21	0	45.3333	305.333	233.667		27.3333	2.66667	1	22	1	46.3333	306.333	234.667
EAY22831	TVAG_075780	0.0769896	-3.69919	2.81467	8.88261	0.002879	2.54076	0.614655	0.211368		0	10.6667	495.667	260.333	16.3333	9.66667	27	2.33333		1	11.6667	496.667	261.333	17.3333	10.6667	28	3.33333
EAY13097	TVAG_212790	3.41901	1.77358	2.74908	8.8953	0.00285906	2.54378	0.614655	0.211368		7.66667	8.33333	26.6667	48	20	235.667	51	13		8.66667	9.33333	27.6667	49	21	236.667	52	14
EAY06936	TVAG_099760	0.108824	-3.19994	-0.135278	8.89749	0.00285563	2.5443	0.614655	0.211368		9.66667	40.3333	0.333333	59	2.33333	0	0.333333	5.66667		10.6667	41.3333	1.33333	60	3.33333	1	1.33333	6.66667
EAY00917	TVAG_168480	4.56633	2.19104	4.0271	8.90321	0.0028467	2.54566	0.614655	0.211368		21.3333	0	10	198.333	226.667	491	33.3333	312		22.3333	1	11	199.333	227.667	492	34.3333	313
EAX98052	TVAG_483090	0.372931	-1.42302	9.85181	8.90793	0.00283934	2.54678	0.614655	0.211368		20571.3	32184.3	18157	15057.3	12939.3	2470.33	8631.33	8017.33		20572.3	32185.3	18158	15058.3	12940.3	2471.33	8632.33	8018.33
EAY13173	TVAG_444570	0.318274	-1.65166	2.38905	8.91114	0.00283436	2.54754	0.614655	0.211368		127	127.333	117	119	31	22.3333	54	46		128	128.333	118	120	32	23.3333	55	47
EAY05298	TVAG_336900	0.0689655	-3.85798	-0.248143	8.83071	0.00296203	2.52841	0.623922	0.204869		0	82	0.333333	0.666667	0.333333	0	0.333333	1.33333		1	83	1.33333	1.66667	1.33333	1	1.33333	2.33333
EAX95926	TVAG_360870	0.339808	-1.55721	9.08177	8.805	0.00300406	2.52229	0.628426	0.201746		17656.3	20815.7	4773.33	9811	6993.33	1402.33	4229.33	5401.33		17657.3	20816.7	4774.33	9812	6994.33	1403.33	4230.33	5402.33
EAX72515	TVAG_589710	28.2667	4.82103	-0.0373663	8.80768	0.00299965	2.52293	0.628426	0.201746		0	0.666667	0.333333	0	137.333	0	0	0		1	1.66667	1.33333	1	138.333	1	1	1
EAY08196	TVAG_308020	0.265102	-1.91538	5.00641	8.78295	0.00304059	2.51704	0.631727	0.199471		346	487.333	1536	694.667	71	88	503	147.333		347	488.333	1537	695.667	72	89	504	148.333
EAY01186	TVAG_412150	3.6278	1.85909	3.21781	8.78875	0.00303094	2.51842	0.631727	0.199471		21.3333	71.3333	13.6667	172.667	96.3333	100.667	302	523.667		22.3333	72.3333	14.6667	173.667	97.3333	101.667	303	524.667
EAY05544	TVAG_318990	3.5	1.80735	2.44329	8.76743	0.00306657	2.51335	0.634957	0.197255		30.6667	14.6667	34.6667	101.333	240	26.3333	141.333	237		31.6667	15.6667	35.6667	102.333	241	27.3333	142.333	238
EAY10879	TVAG_012450	0.28763	-1.79772	3.84809	8.75141	0.00309362	2.50953	0.638387	0.194916		127	174.667	856	156	66	16	44.6667	248.333		128	175.667	857	157	67	17	45.6667	249.333
EAX84166	TVAG_599430	15.0435	3.91107	-0.28046	8.71871	0.00314961	2.50174	0.641245	0.192976		0	0	2.33333	1.33333	47.6667	1.33333	62.3333	0		1	1	3.33333	2.33333	48.6667	2.33333	63.3333	1
EAX85346	TVAG_385450	0.0786517	-3.66838	-1.1979	8.72262	0.00314286	2.50267	0.641245	0.192976		1	0.333333	0.333333	53.6667	0.333333	0	0.333333	0		2	1.33333	1.33333	54.6667	1.33333	1	1.33333	1
EAY21660	TVAG_014270	0.156812	-2.67289	3.59442	8.72451	0.0031396	2.50313	0.641245	0.192976		158.333	62.6667	51.6667	1521.67	92	17	141.667	27.3333		159.333	63.6667	52.6667	1522.67	93	18	142.667	28.3333
EAX98975	TVAG_431840	7.56522	2.91938	-0.94702	8.72718	0.003135	2.50376	0.641245	0.192976		0	0	0.333333	3.33333	39	4.33333	8.66667	2		1	1	1.33333	4.33333	40	5.33333	9.66667	3
EAY17616	TVAG_234970	0.298489	-1.74425	1.47004	8.70172	0.0031791	2.4977	0.645092	0.190378		26.3333	59.3333	113.333	61.6667	21	3.33333	11	39.6667		27.3333	60.3333	114.333	62.6667	22	4.33333	12	40.6667
EAX90584	TVAG_221270	0.0686567	-3.86446	-0.035537	8.69515	0.00319058	2.49613	0.645271	0.190258		105	1	0	1.66667	0.333333	0.333333	2	1		106	2	1	2.66667	1.33333	1.33333	3	2
EAY16989	TVAG_281060	2.73915	1.45373	6.01821	8.68188	0.00321388	2.49297	0.647832	0.188538		228.667	329	478.667	926.333	803.333	1128	1819.33	1632.33		229.667	330	479.667	927.333	804.333	1129	1820.33	1633.33
EAY23731	TVAG_120690	11.2329	3.48966	0.867037	8.6493	0.00327188	2.4852	0.650901	0.186485		1.33333	0.333333	1.66667	17	162	1	1.66667	104.667		2.33333	1.33333	2.66667	18	163	2	2.66667	105.667
EAY04191	TVAG_298080	0.351556	-1.50817	10.9316	8.64965	0.00327125	2.48529	0.650901	0.186485		53984	39031.7	63888	21060	25426.7	5032.67	20876.7	11225.7		53985	39032.7	63889	21061	25427.7	5033.67	20877.7	11226.7
EAY10788	TVAG_121920	3.14662	1.6538	6.02334	8.65503	0.00326159	2.48657	0.650901	0.186485		731.333	161.667	352	951.667	2618.67	577	2525.33	1199.67		732.333	162.667	353	952.667	2619.67	578	2526.33	1200.67
EAX94359	TVAG_449740	0.214286	-2.22239	-1.15448	8.66102	0.00325089	2.488	0.650901	0.186485		4.33333	8.33333	14.3333	11	2.66667	0	1.33333	1		5.33333	9.33333	15.3333	12	3.66667	1	2.33333	2
EAX95539	TVAG_126690	11.1009	3.4726	2.50354	8.63585	0.00329611	2.482	0.653585	0.184698		2	22.6667	10.6667	36.6667	789	2.66667	32.3333	15.6667		3	23.6667	11.6667	37.6667	790	3.66667	33.3333	16.6667
EAY02594	TVAG_254950	12.4167	3.63421	-1.29788	8.61944	0.00332594	2.47809	0.657359	0.182197		0	0	0	0	45.3333	0	0	0.333333		1	1	1	1	46.3333	1	1	1.33333
EAY11216	TVAG_127230	0.121391	-3.04227	2.42417	8.60247	0.00335707	2.47404	0.661364	0.17956		6	531.667	3.66667	20.3333	12.6667	5	12.3333	34.6667		7	532.667	4.66667	21.3333	13.6667	6	13.3333	35.6667
EAX65921	TVAG_592790	6.16	2.62293	-0.0349034	8.57183	0.00341404	2.46673	0.668263	0.175052		0	0.333333	0.333333	3.66667	1	41.6667	0	4.66667		1	1.33333	1.33333	4.66667	2	42.6667	1	5.66667
EAX86373	TVAG_130430	9.59211	3.26185	0.781826	8.57449	0.00340906	2.46737	0.668263	0.175052		1.66667	7.66667	2	10	188	1.66667	4.33333	45		2.66667	8.66667	3	11	189	2.66667	5.33333	46
EAY21675	TVAG_237010	17.0378	4.09067	2.66419	8.55306	0.00344941	2.46226	0.670872	0.173361		9.66667	37	2	9	8.33333	3.33333	1019.33	15.6667		10.6667	38	3	10	9.33333	4.33333	1020.33	16.6667
EAX90131	TVAG_088240	3.56643	1.83448	3.37718	8.55766	0.00344072	2.46335	0.670872	0.173361		45.3333	51	42.3333	228.667	327.333	32	539.667	421.333		46.3333	52	43.3333	229.667	328.333	33	540.667	422.333
EAX91954	TVAG_375810	12.4091	3.63333	-0.553407	8.5098	0.00353239	2.45193	0.678341	0.168552		3	0	0	0.333333	22	2.33333	62.3333	0.333333		4	1	1	1.33333	23	3.33333	63.3333	1.33333
EAX90479	TVAG_424800	6.09556	2.60776	2.71232	8.51469	0.0035229	2.4531	0.678341	0.168552		35	26.3333	1.66667	83	633.333	12.3333	50.6667	214		36	27.3333	2.66667	84	634.333	13.3333	51.6667	215
EAY06968	TVAG_100080	0.352941	-1.5025	-2.53072	8.52119	0.00351035	2.45465	0.678341	0.168552		0	3.66667	2.33333	1.33333	0	0	0	0		1	4.66667	3.33333	2.33333	1	1	1	1
EAX68929	TVAG_583010	9.5625	3.25739	-1.22719	8.52236	0.00350809	2.45493	0.678341	0.168552		0.333333	0.333333	0	0.666667	39.3333	0.666667	7	0		1.33333	1.33333	1	1.66667	40.3333	1.66667	8	1
EAY20172	TVAG_021170	0.326917	-1.613	5.42861	8.50395	0.00354376	2.45054	0.678384	0.168524		303.333	939	2052.67	735.667	252	41.6667	167.333	854		304.333	940	2053.67	736.667	253	42.6667	168.333	855
EAX86201	TVAG_364750	0.0444444	-4.49185	0.229668	8.4977	0.00355596	2.44904	0.678586	0.168395		0	0.666667	0.666667	189.667	3	0	0.666667	1		1	1.66667	1.66667	190.667	4	1	1.66667	2
EAY10602	TVAG_282020	0.130939	-2.93304	1.46009	8.48564	0.0035796	2.44617	0.680964	0.166876		59.3333	201	4	19.3333	1.66667	6.33333	6.66667	19		60.3333	202	5	20.3333	2.66667	7.33333	7.66667	20
EAY07315	TVAG_223780	17.2703	4.11022	0.418626	8.47075	0.00360902	2.44261	0.68442	0.164677		4	2.33333	0.666667	1.33333	0.333333	0	26.3333	182.333		5	3.33333	1.66667	2.33333	1.33333	1	27.3333	183.333
EAY21878	TVAG_249380	0.249192	-2.00467	5.85291	8.46328	0.00362387	2.44083	0.685103	0.164244		164	687.333	3687	819	276	90	148	818		165	688.333	3688	820	277	91	149	819
EAY15961	TVAG_262110	0.209877	-2.25239	-1.77902	8.45588	0.00363865	2.43906	0.685768	0.163823		4.33333	6.33333	0.666667	11.6667	0.666667	0.666667	0	0.333333		5.33333	7.33333	1.66667	12.6667	1.66667	1.66667	1	1.33333
EAX93478	TVAG_427060	5.21212	2.38187	0.572935	8.44303	0.00366446	2.43599	0.6885	0.162096		2.66667	4	8.66667	13.6667	37.3333	13.3333	99	18.3333		3.66667	5	9.66667	14.6667	38.3333	14.3333	100	19.3333
EAX96471	TVAG_024820	0.096463	-3.37388	0.155208	8.43324	0.00368423	2.43365	0.690085	0.161097		4	5	83	7.66667	0	2	0.333333	3.66667		5	6	84	8.66667	1	3	1.33333	4.66667
EAX84149	TVAG_072960	0.0691824	-3.85345	0.999088	8.42709	0.00369672	2.43218	0.690301	0.160962		0.333333	196.333	11	0.333333	9.66667	0	0.333333	0.666667		1.33333	197.333	12	1.33333	10.6667	1	1.33333	1.66667
EAY13307	TVAG_164160	0.39675	-1.3337	8.84291	8.40995	0.00373173	2.42809	0.692588	0.159525		10003.3	10543.7	14350.3	6141.33	5445.33	1257	5017	4560.33		10004.3	10544.7	14351.3	6142.33	5446.33	1258	5018	4561.33
EAY06519	TVAG_358090	5.63419	2.49421	4.13205	8.4125	0.00372649	2.4287	0.692588	0.159525		99.6667	0.666667	5.66667	280	976	151.333	676	390		100.667	1.66667	6.66667	281	977	152.333	677	391
EAY12581	TVAG_154320	10.1227	3.33953	2.2022	8.39658	0.00375929	2.42489	0.695582	0.157652		11	8	4.66667	45.6667	7.33333	1	656.667	73.3333		12	9	5.66667	46.6667	8.33333	2	657.667	74.3333
EAX88787	TVAG_200190	0.322075	-1.63453	9.92587	8.37668	0.00380066	2.42014	0.696882	0.15684		47784.7	29786.7	5124.33	16223.3	11225	1848.33	12445.7	6337.67		47785.7	29787.7	5125.33	16224.3	11226	1849.33	12446.7	6338.67
EAX94101	TVAG_336640	10.1702	3.34628	0.09637	8.38008	0.00379356	2.42095	0.696882	0.15684		0	0.333333	0.333333	11	18	0.333333	90.3333	46.6667		1	1.33333	1.33333	12	19	1.33333	91.3333	47.6667
EAY02125	TVAG_372700	6.96309	2.79973	2.39437	8.38283	0.00378782	2.42161	0.696882	0.15684		47.3333	0	0.333333	47.6667	52	43.6667	376	216		48.3333	1	1.33333	48.6667	53	44.6667	377	217
EAX84033	TVAG_073430	3.34959	1.74398	3.45101	8.36808	0.00381869	2.41809	0.698086	0.156091		52.6667	106	99.3333	100.333	356.667	69	417.333	366.667		53.6667	107	100.333	101.333	357.667	70	418.333	367.667
EAY12449	TVAG_128630	4.54144	2.18315	2.11206	8.35261	0.00385135	2.41439	0.701948	0.153695		0.666667	23.6667	11.6667	80.6667	178.667	23.3333	195.667	146.333		1.66667	24.6667	12.6667	81.6667	179.667	24.3333	196.667	147.333
EAY19840	TVAG_129480	0.0580737	-4.10597	0.98952	8.34086	0.00387632	2.41158	0.702294	0.153481		227.667	0	1.33333	2.33333	0.333333	1.66667	4	3.66667		228.667	1	2.33333	3.33333	1.33333	2.66667	5	4.66667
EAX94640	TVAG_381450	4.6758	2.22521	1.39962	8.34385	0.00386995	2.41229	0.702294	0.153481		9	7	9.66667	43.3333	184.333	7	99	47		10	8	10.6667	44.3333	185.333	8	100	48
EAY23124	TVAG_183610	0.324911	-1.62188	3.88556	8.33391	0.00389119	2.40992	0.702896	0.153109		79.3333	812.667	272.333	243.333	141	25.6667	118.667	169.333		80.3333	813.667	273.333	244.333	142	26.6667	119.667	170.333
EAY21878	TVAG_249380	0.257746	-1.95598	3.97561	8.30974	0.00394331	2.40414	0.703956	0.152454		34.6667	178.667	997.667	269.667	99.6667	13.3333	37	228.667		35.6667	179.667	998.667	270.667	100.667	14.3333	38	229.667
EAY21490	TVAG_199290	0.327845	-1.60891	4.13333	8.31381	0.00393448	2.40511	0.703956	0.152454		135.667	355	886.333	218.333	118	20.3333	66	316		136.667	356	887.333	219.333	119	21.3333	67	317
EAX83403	TVAG_242560	0.301597	-1.72931	2.64263	8.31584	0.00393008	2.4056	0.703956	0.152454		45.6667	233.667	246	34.3333	83.6667	8	42.3333	32		46.6667	234.667	247	35.3333	84.6667	9	43.3333	33
EAX90105	TVAG_256100	8.76238	3.13132	1.12183	8.32012	0.00392082	2.40662	0.703956	0.152454		2.33333	19.3333	0	8	173.667	8.66667	9.33333	99.3333		3.33333	20.3333	1	9	174.667	9.66667	10.3333	100.333
EAX93823	TVAG_177310	4.51244	2.17391	1.46242	8.28901	0.00398858	2.39918	0.709956	0.148768		14.6667	7	0	41.3333	21	36.3333	168.333	72.6667		15.6667	8	1	42.3333	22	37.3333	169.333	73.6667
EAY07834	TVAG_312330	0.358841	-1.47858	8.18117	8.27817	0.00401246	2.39659	0.712124	0.147445		10036	11736.3	2318.67	4066	4134.67	553	2781	2632.67		10037	11737.3	2319.67	4067	4135.67	554	2782	2633.67
EAX87631	TVAG_288050	4.58824	2.19794	-1.3878	8.27086	0.00402865	2.39484	0.712919	0.14696		0	0	0	1.66667	0.333333	13.3333	5	3.33333		1	1	1	2.66667	1.33333	14.3333	6	4.33333
EAX97285	TVAG_123350	6	2.58496	-2.00389	8.25277	0.004069	2.39051	0.713833	0.146403		0	0	0	0.333333	0	0	3.66667	18.3333		1	1	1	1.33333	1	1	4.66667	19.3333
EAX93334	TVAG_181270	0.125926	-2.98935	3.94705	8.25668	0.00406022	2.39145	0.713833	0.146403		157	1301.67	0.333333	292	4.33333	7	75	130.667		158	1302.67	1.33333	293	5.33333	8	76	131.667
EAX79890	TVAG_584850	0.125749	-2.99139	-0.850326	8.25943	0.00405408	2.39211	0.713833	0.146403		6.33333	38.6667	0	6.66667	0.333333	0.333333	1.33333	1		7.33333	39.6667	1	7.66667	1.33333	1.33333	2.33333	2
EAX89815	TVAG_085890	0.0837927	-3.57703	1.47445	8.20214	0.00418411	2.3784	0.721551	0.141733		47.3333	250	0.333333	0.666667	5	0	0	16.3333		48.3333	251	1.33333	1.66667	6	1	1	17.3333
EAY21649	TVAG_014160	0.219183	-2.18979	4.06942	8.20633	0.00417445	2.3794	0.721551	0.141733		930.667	663	43.6667	89.3333	108.667	42	114	110.667		931.667	664	44.6667	90.3333	109.667	43	115	111.667
EAY22308	TVAG_377870	0.285126	-1.81033	8.29629	8.20989	0.00416626	2.38025	0.721551	0.141733		1240	3203	21090.7	2411.33	2886	364.667	1328.67	3385.67		1241	3204	21091.7	2412.33	2887	365.667	1329.67	3386.67
EAX99906	TVAG_159260	0.130374	-2.93928	4.00355	8.21449	0.00415572	2.38135	0.721551	0.141733		54.6667	1330	260.667	10	169	1.33333	38.3333	3.66667		55.6667	1331	261.667	11	170	2.33333	39.3333	4.66667
EAY12625	TVAG_074530	0.250887	-1.99489	3.88216	8.21943	0.00414442	2.38254	0.721551	0.141733		80.6667	816.667	398.667	109.667	231.333	16.6667	77	24.6667		81.6667	817.667	399.667	110.667	232.333	17.6667	78	25.6667
EAX96993	TVAG_440090	0.27662	-1.85402	2.649	8.22463	0.00413256	2.38378	0.721551	0.141733		16	179	296.333	80.6667	28	12.3333	33	82		17	180	297.333	81.6667	29	13.3333	34	83
EAX86096	TVAG_264580	0.0869565	-3.52356	-1.0767	8.17976	0.00423603	2.37304	0.728442	0.137605		0	42	0	0	0	0	0	0		1	43	1	1	1	1	1	1
EAY07303	TVAG_223660	7.53333	2.91329	-1.62807	8.1493	0.00430779	2.36575	0.730464	0.136401		0.333333	0	0	0.666667	5.33333	0	0.666667	27.6667		1.33333	1	1	1.66667	6.33333	1	1.66667	28.6667
EAY04207	TVAG_298270	0.360514	-1.47187	7.36246	8.15085	0.00430409	2.36612	0.730464	0.136401		4476	6686	2351.67	1709.67	1503	490.667	1520.33	1971.67		4477	6687	2352.67	1710.67	1504	491.667	1521.33	1972.67
EAX79509	TVAG_147590	0.164384	-2.60486	-1.88645	8.15728	0.00428885	2.36766	0.730464	0.136401		19.3333	0	0	1	0	0	0	0		20.3333	1	1	2	1	1	1	1
EAX88668	TVAG_202450	7.00254	2.80788	2.84444	8.15915	0.00428445	2.36811	0.730464	0.136401		3.33333	46	16.6667	61	728.333	44.6667	133.667	6.66667		4.33333	47	17.6667	62	729.333	45.6667	134.667	7.66667
EAX95744	TVAG_105030	8.16667	3.02975	-1.79585	8.16885	0.0042616	2.37043	0.730464	0.136401		0	0	0	0	0	0	28	0.666667		1	1	1	1	1	1	29	1.66667
EAY15265	TVAG_394080	0.0935673	-3.41785	-1.18815	8.13853	0.00433345	2.36317	0.732774	0.13503		4.33333	1	0.333333	47.3333	0	0.333333	1	0		5.33333	2	1.33333	48.3333	1	1.33333	2	1
EAY19870	TVAG_129780	0.0932642	-3.42253	0.365827	8.11331	0.00439414	2.35713	0.738932	0.131395		0	86	37.6667	1	7	0	0.333333	0.666667		1	87	38.6667	2	8	1	1.33333	1.66667
EAX90478	TVAG_424790	7.00633	2.80866	1.38833	8.11579	0.00438814	2.35772	0.738932	0.131395		8	8.66667	0	32	259	3.33333	23.3333	79.3333		9	9.66667	1	33	260	4.33333	24.3333	80.3333
EAX92271	TVAG_168040	3.58333	1.8413	-2.4655	8.10587	0.00441222	2.35534	0.739928	0.13081		0	0	0	0	1	0.333333	9	0		1	1	1	1	2	1.33333	10	1
EAX92288	TVAG_108050	10	3.32193	-0.0949981	8.06179	0.00452085	2.34478	0.756062	0.121442		4	0.333333	0	4.66667	91.6667	0	16	18.3333		5	1.33333	1	5.66667	92.6667	1	17	19.3333
EAX91184	TVAG_287080	19.4615	4.28255	0.30528	8.05146	0.0045467	2.3423	0.756231	0.121346		0.333333	4	0	0.333333	159	5	0	0.666667		1.33333	5	1	1.33333	160	6	1	1.66667
EAY18574	TVAG_462600	0.170088	-2.55565	0.0826816	8.05296	0.00454294	2.34266	0.756231	0.121346		10.3333	13	38	48.3333	10.3333	1.66667	1.66667	1.66667		11.3333	14	39	49.3333	11.3333	2.66667	2.66667	2.66667
EAY12189	TVAG_003950	0.342658	-1.54516	9.42319	8.04009	0.00457532	2.33958	0.758918	0.119805		20125.3	28311	5766.67	12544.7	10203.3	1864	5913	4888.67		20126.3	28312	5767.67	12545.7	10204.3	1865	5914	4889.67
EAY22476	TVAG_034990	0.25694	-1.9605	3.13918	7.98645	0.00471287	2.32671	0.767102	0.115147		581.333	205.667	15	130.667	69	16	95	56.6667		582.333	206.667	16	131.667	70	17	96	57.6667
EAY18839	TVAG_294910	0.103825	-3.26777	-1.08458	7.98674	0.00471211	2.32678	0.767102	0.115147		0	2.66667	3.66667	50.6667	0.666667	0	1	0.666667		1	3.66667	4.66667	51.6667	1.66667	1	2	1.66667
EAX93628	TVAG_336140	0.178218	-2.48829	-1.54585	7.98741	0.00471038	2.32694	0.767102	0.115147		4.66667	1	6.66667	17.3333	0	1	0.666667	0.333333		5.66667	2	7.66667	18.3333	1	2	1.66667	1.33333
EAY22854	TVAG_076010	0.0953757	-3.39023	0.306264	7.99127	0.00470034	2.32787	0.767102	0.115147		1	33	72.3333	5	1.66667	3	0.333333	2		2	34	73.3333	6	2.66667	4	1.33333	3
EAY01586	TVAG_025840	0.137255	-2.86507	-1.42986	7.9931	0.00469559	2.32831	0.767102	0.115147		2	27.6667	0	0.333333	0	0	0.333333	0.333333		3	28.6667	1	1.33333	1	1	1.33333	1.33333
EAX94947	TVAG_433560	4.15385	2.05445	-2.30127	8.00209	0.00467233	2.33047	0.767102	0.115147		0.333333	0	0	0	0	0	6	8		1.33333	1	1	1	1	1	7	9
EAY07963	TVAG_332880	7.70656	2.94609	2.1348	8.00657	0.00466078	2.33154	0.767102	0.115147		19	0	0.333333	63	41.6667	11.6667	181	427		20	1	1.33333	64	42.6667	12.6667	182	428
EAX71982	TVAG_524510	13.0794	3.70922	0.9347	7.96329	0.00477355	2.32116	0.768757	0.114211		1.33333	0	4.33333	11.3333	260.667	2.66667	6.33333	1		2.33333	1	5.33333	12.3333	261.667	3.66667	7.33333	2
EAX92270	TVAG_168030	3.41667	1.77259	-2.4987	7.96358	0.0047728	2.32123	0.768757	0.114211		0	0	0	0	1	0.333333	8.33333	0		1	1	1	1	2	1.33333	9.33333	1
EAX95296	TVAG_270870	0.191781	-2.38247	-1.99784	7.96922	0.00475795	2.32258	0.768757	0.114211		0	4	0.666667	15.6667	0.666667	0	0	0		1	5	1.66667	16.6667	1.66667	1	1	1
EAY10685	TVAG_157620	0.354298	-1.49696	3.66617	7.97553	0.00474139	2.32409	0.768757	0.114211		393.333	570.667	159.667	86	137.667	9	199.667	79.6667		394.333	571.667	160.667	87	138.667	10	200.667	80.6667
EAX91607	TVAG_385590	0.192857	-2.3744	-0.0307222	7.93392	0.00485167	2.31411	0.779275	0.108309		4	27	45	13.3333	7.66667	0	5.33333	1		5	28	46	14.3333	8.66667	1	6.33333	2
EAX92822	TVAG_448190	0.152174	-2.71621	-1.81157	7.90948	0.00491764	2.30824	0.779587	0.108135		3	1	0	22.6667	0	0.333333	0.333333	0		4	2	1	23.6667	1	1.33333	1.33333	1
EAY19119	TVAG_190130	0.381666	-1.38962	8.1276	7.91027	0.00491551	2.30843	0.779587	0.108135		4955.67	6405.33	9300.33	4167	3308.67	943	2773.33	2448.67		4956.67	6406.33	9301.33	4168	3309.67	944	2774.33	2449.67
EAY07285	TVAG_223480	0.0819672	-3.60881	-0.710565	7.91804	0.00489442	2.3103	0.779587	0.108135		0.333333	56.3333	0.333333	0	0	0	1	0		1.33333	57.3333	1.33333	1	1	1	2	1
EAX84571	TVAG_316670	4.07143	2.02554	-2.22918	7.92124	0.00488577	2.31107	0.779587	0.108135		0.333333	0	0	0.333333	1	0.333333	2.66667	11		1.33333	1	1	1.33333	2	1.33333	3.66667	12
EAX68076	TVAG_519620	0.3392	-1.55979	5.01475	7.92354	0.00487958	2.31162	0.779587	0.108135		1937	583.667	217.667	572.333	195.333	54.3333	342.333	528.333		1938	584.667	218.667	573.333	196.333	55.3333	343.333	529.333
EAY23705	TVAG_120430	3.66667	1.87447	-2.19378	7.90189	0.0049383	2.30642	0.780829	0.107444		0	0	1	0	6	0.666667	4.66667	3		1	1	2	1	7	1.66667	5.66667	4
EAY11852	TVAG_362320	4.77899	2.2567	1.6855	7.89236	0.00496439	2.30413	0.782921	0.106282		25	6.66667	2.66667	53.6667	56	8.33333	160.333	211		26	7.66667	3.66667	54.6667	57	9.33333	161.333	212
EAY08774	TVAG_188610	3.94313	1.97934	1.32334	7.81277	0.00518784	2.28501	0.783647	0.10588		13	16.3333	3.66667	33.3333	20.6667	25.6667	156	71		14	17.3333	4.66667	34.3333	21.6667	26.6667	157	72
EAY13851	TVAG_044110	0.306122	-1.70782	-2.26271	7.81401	0.00518428	2.28531	0.783647	0.10588		4	2.66667	0.333333	5.33333	0.333333	0	0	0.666667		5	3.66667	1.33333	6.33333	1.33333	1	1	1.66667
EAY14034	TVAG_478590	6.3	2.65535	-0.295189	7.81891	0.00517025	2.28649	0.783647	0.10588		0	0	0	2.66667	0	36.3333	0.333333	1.33333		1	1	1	3.66667	1	37.3333	1.33333	2.33333
EAX92604	TVAG_178810	0.224101	-2.15778	0.767766	7.82033	0.00516617	2.28683	0.783647	0.10588		13	57	66	17.6667	7.33333	4	15.3333	4.66667		14	58	67	18.6667	8.33333	5	16.3333	5.66667
EAX77880	TVAG_175790	3.64286	1.86507	-2.31842	7.82268	0.00515946	2.2874	0.783647	0.10588		0	0.666667	0	0	1.66667	0	5	6.33333		1	1.66667	1	1	2.66667	1	6	7.33333
EAX88703	TVAG_005000	0.125	-3	-1.73903	7.82414	0.00515529	2.28775	0.783647	0.10588		0	2	0	28.6667	0	0	0	0.333333		1	3	1	29.6667	1	1	1	1.33333
EAX95306	TVAG_032080	4.25	2.08746	1.21446	7.82914	0.00514104	2.28895	0.783647	0.10588		14	3.66667	9.66667	34	25.3333	16.6667	159	72.6667		15	4.66667	10.6667	35	26.3333	17.6667	160	73.6667
EAY13453	TVAG_206210	16	4	-0.666706	7.83946	0.0051118	2.29143	0.783647	0.10588		0	0	0	1.66667	0	0.333333	85.3333	1		1	1	1	2.66667	1	1.33333	86.3333	2
EAX88232	TVAG_348740	0.122642	-3.02748	-1.46741	7.84002	0.00511021	2.29156	0.783647	0.10588		30	1.33333	0	0	0	0	0	0.333333		31	2.33333	1	1	1	1	1	1.33333
EAY15915	TVAG_165430	3.32	1.73118	2.22897	7.84741	0.00508935	2.29334	0.783647	0.10588		61.6667	16.3333	29	47.3333	203.333	27	160.333	131		62.6667	17.3333	30	48.3333	204.333	28	161.333	132
EAY23441	TVAG_071050	12.2778	3.61798	-0.884113	7.84937	0.00508385	2.29381	0.783647	0.10588		0.666667	0.333333	0.333333	0.666667	0.333333	1	0.666667	67.6667		1.66667	1.33333	1.33333	1.66667	1.33333	2	1.66667	68.6667
EAX97394	TVAG_374750	0.161113	-2.63386	3.35311	7.86262	0.00504672	2.29699	0.783647	0.10588		50	773	195.667	7.66667	122.667	2.33333	34.3333	2.66667		51	774	196.667	8.66667	123.667	3.33333	35.3333	3.66667
EAY03579	TVAG_042310	3.40639	1.76824	4.85116	7.8672	0.00503396	2.29809	0.783647	0.10588		112	381.667	148	262.333	1045	242.667	1343.67	457.667		113	382.667	149	263.333	1046	243.667	1344.67	458.667
EAX94766	TVAG_346300	3.73934	1.90279	2.64531	7.86914	0.00502856	2.29856	0.783647	0.10588		42.6667	23.6667	35.6667	97.3333	54.6667	34.6667	454	213		43.6667	24.6667	36.6667	98.3333	55.6667	35.6667	455	214
EAY04700	TVAG_474980	0.392789	-1.34817	10.5267	7.87005	0.00502603	2.29877	0.783647	0.10588		46837	49777	20440.7	23914.3	13946	2584.67	30207.7	8630.33		46838	49778	20441.7	23915.3	13947	2585.67	30208.7	8631.33
EAX90213	TVAG_155090	3.80514	1.92795	2.77658	7.87173	0.00502137	2.29918	0.783647	0.10588		63.6667	57	10.3333	85.6667	417.667	25	254.333	138.667		64.6667	58	11.3333	86.6667	418.667	26	255.333	139.667
EAX99847	TVAG_419040	0.440699	-1.18213	8.35986	7.88408	0.00498718	2.30215	0.783647	0.10588		6341.33	9097	9634	4709.67	4927	323.667	3543	4329		6342.33	9098	9635	4710.67	4928	324.667	3544	4330
EAX94736	TVAG_480170	0.342075	-1.54761	3.27886	7.7815	0.00527838	2.2775	0.791432	0.101586		83.3333	157.667	513	119	91.6667	8	29	167.333		84.3333	158.667	514	120	92.6667	9	30	168.333
EAX92295	TVAG_108120	0.129987	-2.94356	1.40913	7.78348	0.0052726	2.27797	0.791432	0.101586		2.33333	135.667	114.333	2.66667	25.6667	0.333333	3.33333	0.333333		3.33333	136.667	115.333	3.66667	26.6667	1.33333	4.33333	1.33333
EAY23177	TVAG_184830	0.157514	-2.66644	1.35069	7.7878	0.00526003	2.27901	0.791432	0.101586		8	3	206.333	9.33333	3.33333	3	17.6667	8.33333		9	4	207.333	10.3333	4.33333	4	18.6667	9.33333
EAY11879	TVAG_362590	4.89167	2.29033	0.703084	7.77595	0.00529463	2.27616	0.791918	0.10132		3.66667	15.3333	0.666667	16.3333	68.6667	10.3333	55	57.6667		4.66667	16.3333	1.66667	17.3333	69.6667	11.3333	56	58.6667
EAX92475	TVAG_331510	2.75982	1.46457	4.71768	7.74486	0.00538656	2.26869	0.793964	0.100199		274.333	164	159	273	313.333	350.667	1144.67	600.333		275.333	165	160	274	314.333	351.667	1145.67	601.333
EAY08314	TVAG_401680	3.12918	1.64579	3.71257	7.74488	0.00538649	2.26869	0.793964	0.100199		101	60.3333	86.6667	246	503.333	49.3333	562.667	439		102	61.3333	87.6667	247	504.333	50.3333	563.667	440
EAY00191	TVAG_007210	7.05263	2.81816	-0.51553	7.74984	0.00537172	2.26989	0.793964	0.100199		2	0.333333	1.66667	4.66667	51.6667	0.666667	16.3333	16.6667		3	1.33333	2.66667	5.66667	52.6667	1.66667	17.3333	17.6667
EAY15173	TVAG_201670	0.0545746	-4.19563	0.328494	7.75169	0.00536623	2.27033	0.793964	0.100199		2	1.66667	0	200	0	0	1.66667	5.66667		3	2.66667	1	201	1	1	2.66667	6.66667
EAY01946	TVAG_048010	4.58065	2.19555	4.13432	7.75691	0.00535074	2.27159	0.793964	0.100199		144.667	70.3333	30	288.333	207.667	33.6667	1297.67	918.333		145.667	71.3333	31	289.333	208.667	34.6667	1298.67	919.333
EAX97074	TVAG_086130	14.6001	3.8679	6.80727	7.76594	0.00532407	2.27376	0.793964	0.100199		31.6667	0.333333	13	1192	14356	12.6667	720.667	3025.33		32.6667	1.33333	14	1193	14357	13.6667	721.667	3026.33
EAY19836	TVAG_129440	0.398058	-1.32895	2.30196	7.69609	0.00553406	2.25696	0.794542	0.0998832		75.6667	180.333	103.333	83	44.3333	13	59.6667	56.6667		76.6667	181.333	104.333	84	45.3333	14	60.6667	57.6667
EAY09250	TVAG_133070	0.112554	-3.15131	-0.242063	7.69658	0.00553256	2.25707	0.794542	0.0998832		1.66667	0.333333	68	3	0	0.333333	3.33333	1		2.66667	1.33333	69	4	1	1.33333	4.33333	2
EAX83453	TVAG_155240	5.44828	2.4458	-1.01488	7.70006	0.0055219	2.25791	0.794542	0.0998832		0.666667	0	0.333333	4.66667	29	4.33333	11	4.33333		1.66667	1	1.33333	5.66667	30	5.33333	12	5.33333
EAY23152	TVAG_183890	8.28571	3.05063	-1.54593	7.70609	0.00550348	2.25936	0.794542	0.0998832		0.666667	0	0	0	0	1.66667	32.3333	0.666667		1.66667	1	1	1	1	2.66667	33.3333	1.66667
EAX87548	TVAG_318630	5.03125	2.33092	-0.207177	7.70761	0.00549885	2.25973	0.794542	0.0998832		0	0	0.666667	6	0.333333	32.6667	12.3333	4.33333		1	1	1.66667	7	1.33333	33.6667	13.3333	5.33333
EAY16107	TVAG_464950	3.19289	1.67486	2.4637	7.71126	0.00548773	2.26061	0.794542	0.0998832		61	39.3333	35.3333	57.3333	183	25.3333	238	178.667		62	40.3333	36.3333	58.3333	184	26.3333	239	179.667
EAX90150	TVAG_413190	4.81454	2.2674	2.32459	7.71522	0.00547573	2.26156	0.794542	0.0998832		4.66667	65	10.6667	48.6667	116.667	24.6667	132.333	362.667		5.66667	66	11.6667	49.6667	117.667	25.6667	133.333	363.667
EAY17699	TVAG_170120	2.35596	1.23631	4.28188	7.71567	0.00547435	2.26167	0.794542	0.0998832		108	90.6667	120	379.667	463	292.667	495.333	399.667		109	91.6667	121	380.667	464	293.667	496.333	400.667
EAY19276	TVAG_451900	2.84699	1.50944	5.3708	7.72151	0.00545668	2.26307	0.794542	0.0998832		273	229.667	258	862.667	1297.67	246	1540	1545.33		274	230.667	259	863.667	1298.67	247	1541	1546.33
EAY17734	TVAG_170480	3.85469	1.94661	3.49285	7.7299	0.00543137	2.26509	0.794542	0.0998832		22.3333	27.6667	119.667	78.6667	519	197.333	57.3333	195		23.3333	28.6667	120.667	79.6667	520	198.333	58.3333	196
EAY17434	TVAG_493760	0.29152	-1.77833	3.80027	7.73657	0.00541136	2.26669	0.794542	0.0998832		134	65.6667	905.333	121.333	79.3333	26.6667	100.667	148		135	66.6667	906.333	122.333	80.3333	27.6667	101.667	149
EAY01967	TVAG_431080	0.397002	-1.33278	4.35599	7.68147	0.00557908	2.25344	0.795378	0.0994262		264.667	668	587	389	179	24.6667	99.3333	452.333		265.667	669	588	390	180	25.6667	100.333	453.333
EAY06410	TVAG_403670	0.147059	-2.76553	-0.000897438	7.68251	0.00557585	2.25369	0.795378	0.0994262		24	70	0.666667	3.33333	1	0.333333	4.33333	5.33333		25	71	1.66667	4.33333	2	1.33333	5.33333	6.33333
EAX94804	TVAG_103730	0.288889	-1.79141	-2.35793	7.6893	0.00555493	2.25532	0.795378	0.0994262		0	5.66667	0	5.33333	0	0	0	0.333333		1	6.66667	1	6.33333	1	1	1	1.33333
EAY16419	TVAG_004500	4.23783	2.08333	3.52293	7.67608	0.00559577	2.25214	0.795894	0.0991447		55	9	1.33333	232	163.333	151	172.333	786.333		56	10	2.33333	233	164.333	152	173.333	787.333
EAX98100	TVAG_439440	0.236364	-2.08092	-2.07881	7.6605	0.00564429	2.24839	0.800923	0.0964093		0	12.3333	1.66667	0.333333	0.333333	0	0	0		1	13.3333	2.66667	1.33333	1.33333	1	1	1
EAY18838	TVAG_294900	0.22807	-2.13245	-2.25712	7.6539	0.00566499	2.2468	0.801991	0.0958307		0.333333	0.333333	0.666667	13.6667	0.333333	0	0	0		1.33333	1.33333	1.66667	14.6667	1.33333	1	1	1
EAY21354	TVAG_167290	0.14094	-2.82685	-0.971774	7.64594	0.00569003	2.24489	0.803667	0.0949241		4.33333	37.6667	0	3.66667	1	0	0.666667	1.33333		5.33333	38.6667	1	4.66667	2	1	1.66667	2.33333
EAY01819	TVAG_273300	5.59204	2.48337	1.6356	7.61958	0.00577378	2.23854	0.806144	0.0935873		9	8.66667	31.6667	13.6667	213.333	18.3333	120.667	18.3333		10	9.66667	32.6667	14.6667	214.333	19.3333	121.667	19.3333
EAY12182	TVAG_003880	0.0519896	-4.26563	4.23863	7.6197	0.0057734	2.23857	0.806144	0.0935873		35	9	10.3333	3275.67	56.3333	31.6667	9.33333	72		36	10	11.3333	3276.67	57.3333	32.6667	10.3333	73
EAY21373	TVAG_198100	0.400979	-1.3184	9.83104	7.6242	0.00575901	2.23965	0.806144	0.0935873		24829.7	28547.7	14436.3	16242.3	9300.33	3023	12827.3	8551.67		24830.7	28548.7	14437.3	16243.3	9301.33	3024	12828.3	8552.67
EAY05925	TVAG_087030	0.0680878	-3.87646	3.33391	7.62881	0.00574433	2.24076	0.806144	0.0935873		131.667	165.333	505.667	241	19.6667	43.6667	2.66667	1.33333		132.667	166.333	506.667	242	20.6667	44.6667	3.66667	2.33333
EAX90104	TVAG_256090	5.57463	2.47888	2.99868	7.62993	0.00574074	2.24103	0.806144	0.0935873		27	82	1	64.6667	560	53	36.6667	342.333		28	83	2	65.6667	561	54	37.6667	343.333
EAY07350		0.214765	-2.21917	-0.989774	7.55669	0.00597877	2.22339	0.808794	0.0921618		2.33333	16	9.33333	18	1.33333	0.333333	2	3		3.33333	17	10.3333	19	2.33333	1.33333	3	4
EAY07378	TVAG_204850	0.169231	-2.56294	0.915442	7.55854	0.00597263	2.22383	0.808794	0.0921618		3.66667	20.3333	138.667	6.66667	0	0.333333	14	11		4.66667	21.3333	139.667	7.66667	1	1.33333	15	12
EAY14158		3.63492	1.86192	2.94466	7.55914	0.00597065	2.22398	0.808794	0.0921618		40	53	28.3333	147.667	157.667	19.3333	434	377.333		41	54	29.3333	148.667	158.667	20.3333	435	378.333
EAY09311	TVAG_394830	0.178344	-2.48727	0.162788	7.56616	0.00594743	2.22567	0.808794	0.0921618		6.66667	14	64.3333	15.6667	0.333333	2	4.33333	8		7.66667	15	65.3333	16.6667	1.33333	3	5.33333	9
EAX91200		3.7166	1.89398	5.03778	7.56881	0.0059387	2.22631	0.808794	0.0921618		163.333	131	37	757.333	246	226.333	1726	1858.67		164.333	132	38	758.333	247	227.333	1727	1859.67
EAX89931	TVAG_434980	0.363636	-1.45943	-2.51434	7.57051	0.00593309	2.22672	0.808794	0.0921618		0	2	5	0	0	0	0	0		1	3	6	1	1	1	1	1
EAY08603		0.408327	-1.2922	7.95438	7.57055	0.00593298	2.22673	0.808794	0.0921618		6785.67	7235.33	3347.33	5957	2531	859.667	3207.67	2923.67		6786.67	7236.33	3348.33	5958	2532	860.667	3208.67	2924.67
EAY08229	TVAG_308350	9.64063	3.26913	0.451117	7.57351	0.00592324	2.22744	0.808794	0.0921618		1	0	0	16.3333	43.6667	0.333333	137.667	20		2	1	1	17.3333	44.6667	1.33333	138.667	21
EAY20024	TVAG_402810	0.0695951	-3.84487	3.77032	7.57559	0.0059164	2.22794	0.808794	0.0921618		13	19	1167.33	56.3333	13	39	14.6667	17		14	20	1168.33	57.3333	14	40	15.6667	18
EAY03388	TVAG_489320	11.3333	3.5025	-1.46809	7.5774	0.00591047	2.22838	0.808794	0.0921618		0	0	0	0	0	0	41.3333	0		1	1	1	1	1	1	42.3333	1
EAY01317	TVAG_407460	0.0579244	-4.10969	2.12599	7.57948	0.00590363	2.22888	0.808794	0.0921618		0	0.666667	409.667	0	16	0	2.66667	1.33333		1	1.66667	410.667	1	17	1	3.66667	2.33333
EAX87456	TVAG_287980	0.184783	-2.4361	-1.66717	7.58278	0.00589286	2.22967	0.808794	0.0921618		8.66667	0	4.33333	13.6667	1.33333	0.333333	0	0		9.66667	1	5.33333	14.6667	2.33333	1.33333	1	1
EAY16160	TVAG_465480	17.0556	4.09217	-0.518024	7.5968	0.00584721	2.23305	0.808794	0.0921618		0	0	1.33333	0.666667	0.333333	0	96.3333	1.66667		1	1	2.33333	1.66667	1.33333	1	97.3333	2.66667
EAX88266	TVAG_012690	2.91667	1.54432	-2.61026	7.6057	0.00581841	2.2352	0.808794	0.0921618		0	0	0	0	0	0.333333	2	5.33333		1	1	1	1	1	1.33333	3	6.33333
EAX99871	TVAG_425080	10.5833	3.40372	-1.46931	7.55225	0.00599352	2.22232	0.808992	0.0920558		0	0	0	0	38.3333	0	0	0		1	1	1	1	39.3333	1	1	1
EAX99761		4.67116	2.22378	2.08469	7.5429	0.0060247	2.22006	0.809611	0.0917236		30	13.3333	27	49.3333	66	6	231.333	270.333		31	14.3333	28	50.3333	67	7	232.333	271.333
EAY03240	TVAG_421270	0.111111	-3.16993	-1.08562	7.54633	0.00601323	2.22089	0.809611	0.0917236		0.666667	40	0.333333	0	0	0	0.666667	0.333333		1.66667	41	1.33333	1	1	1	1.66667	1.33333
EAX94399		0.430278	-1.21666	8.32353	7.53756	0.00604257	2.21878	0.810223	0.0913955		8190	9221.33	6669	4787.67	4310.33	861.333	4465	2782.33		8191	9222.33	6670	4788.67	4311.33	862.333	4466	2783.33
EAX89662	TVAG_171420	0.0777778	-3.6845	0.369369	7.52815	0.00607423	2.21651	0.810896	0.0910349		0	3.66667	112.333	0	0.333333	0	0	5		1	4.66667	113.333	1	1.33333	1	1	6
EAX99520		0.438823	-1.18829	7.55956	7.5311	0.00606429	2.21722	0.810896	0.0910349		4348	5395.33	4212.67	2914.67	2077.33	525	2831.33	1967.33		4349	5396.33	4213.67	2915.67	2078.33	526	2832.33	1968.33
EAY18343		3.975	1.99095	1.48102	7.52045	0.00610025	2.21465	0.812588	0.0901296		6	27.3333	15	27.6667	76	20	168.333	49.6667		7	28.3333	16	28.6667	77	21	169.333	50.6667
EAX93006		2.56865	1.36101	5.15308	7.51502	0.00611866	2.21334	0.81326	0.0897704		313.333	326.333	256.667	350	981.333	431.333	997.667	797.333		314.333	327.333	257.667	351	982.333	432.333	998.667	798.333
EAY22654		4.47035	2.16039	4.55922	7.4981	0.00617642	2.20926	0.819149	0.0866369		59.3333	114	272	208.333	1551.33	82.6667	797.333	504.667		60.3333	115	273	209.333	1552.33	83.6667	798.333	505.667
EAX77529	TVAG_060710	0.226415	-2.14296	-2.12951	7.4932	0.00619326	2.20808	0.819597	0.0863998		0	13.3333	0.333333	0	0	0	0	0		1	14.3333	1.33333	1	1	1	1	1
EAY23210	TVAG_185160	0.445084	-1.16785	3.30874	7.47716	0.00624865	2.20421	0.819798	0.086293		177.667	232	304.333	150	131	23.6667	114.333	113.333		178.667	233	305.333	151	132	24.6667	115.333	114.333
EAX66467	TVAG_544380	0.375	-1.41504	-2.5612	7.4792	0.00624159	2.2047	0.819798	0.086293		0	0	5.33333	1.33333	0	0	0	0		1	1	6.33333	2.33333	1	1	1	1
EAY04050	TVAG_055360	8.33333	3.05889	1.35077	7.47966	0.00623998	2.20482	0.819798	0.086293		7	6	9.33333	16.6667	325	1.33333	12	16		8	7	10.3333	17.6667	326	2.33333	13	17
EAX93783		0.203747	-2.29515	1.43966	7.48184	0.00623245	2.20534	0.819798	0.086293		161.667	86.6667	11.6667	20.6667	40.3333	3	7	3.66667		162.667	87.6667	12.6667	21.6667	41.3333	4	8	4.66667
EAY12726		0.386641	-1.37094	8.57609	7.45721	0.0063183	2.1994	0.8201	0.0861334		8679.33	8007	11163.7	6204.33	3630.33	1483.67	4634.67	3415.67		8680.33	8008	11164.7	6205.33	3631.33	1484.67	4635.67	3416.67
EAX99193	TVAG_092490	0.315515	-1.66422	10.2929	7.46102	0.00630494	2.20032	0.8201	0.0861334		24869	12089	48677	31504	12102.7	5280	10749.3	8824.33		24870	12090	48678	31505	12103.7	5281	10750.3	8825.33
EAX95968		4.522	2.17696	2.46532	7.46126	0.0063041	2.20038	0.8201	0.0861334		21.6667	9.33333	25.6667	106	366.333	5	169.333	209		22.6667	10.3333	26.6667	107	367.333	6	170.333	210
EAY15876		6.23237	2.63978	2.93595	7.46466	0.00629219	2.2012	0.8201	0.0861334		1	7.66667	5.33333	142.667	500.667	57	8	431.667		2	8.66667	6.33333	143.667	501.667	58	9	432.667
EAY04086	TVAG_203900	0.243317	-2.03909	6.36063	7.47183	0.00626717	2.20293	0.8201	0.0861334		299	333.333	5969.67	713.667	567	158.333	233.333	818.333		300	334.333	5970.67	714.667	568	159.333	234.333	819.333
EAX91031	TVAG_425230	5.76	2.52607	-1.27655	7.45063	0.00634142	2.19781	0.821349	0.0854722		0	0.666667	0	3.66667	7	1	9	27		1	1.66667	1	4.66667	8	2	10	28
EAX88495	TVAG_326760	6.1569	2.6222	2.93921	7.43913	0.00638208	2.19504	0.821372	0.0854602		83	12.3333	44.6667	32.3333	203	11.6667	784.333	82.6667		84	13.3333	45.6667	33.3333	204	12.6667	785.333	83.6667
EAX87970	TVAG_033620	0.0842697	-3.56884	-0.735511	7.44041	0.00637754	2.19535	0.821372	0.0854602		0.666667	53.6667	0	1	0	0.666667	0	0.333333		1.66667	54.6667	1	2	1	1.66667	1	1.33333
EAX95799		0.293843	-1.76688	8.21887	7.44647	0.00635611	2.19681	0.821372	0.0854602		11969	13004.3	898.667	4145.67	3180.67	717.667	3533	1386.33		11970	13005.3	899.667	4146.67	3181.67	718.667	3534	1387.33
EAY15833		0.37102	-1.43043	10.2148	7.3993	0.00652493	2.18542	0.82237	0.0849325		41707	37368.7	5828.67	37622.3	17241	2059.67	15826.3	10330.3		41708	37369.7	5829.67	37623.3	17242	2060.67	15827.3	10331.3
EAX96020		0.296854	-1.75218	6.53481	7.39967	0.00652357	2.18551	0.82237	0.0849325		483	1489.33	5951	156.333	788	87.3333	771.333	749		484	1490.33	5952	157.333	789	88.3333	772.333	750
EAY02903		3.51072	1.81177	2.90455	7.40141	0.00651729	2.18593	0.82237	0.0849325		27	62.3333	46.3333	124.667	315.333	19.3333	303.333	286		28	63.3333	47.3333	125.667	316.333	20.3333	304.333	287
EAY06906	TVAG_057000	0.358396	-1.48037	12.0006	7.40255	0.00651314	2.18621	0.82237	0.0849325		120964	81845	134177	31826.7	60447	10220	43009.3	18502.3		120965	81846	134178	31827.7	60448	10221	43010.3	18503.3
EAX75921	TVAG_233920	0.320673	-1.64082	2.92444	7.40352	0.00650963	2.18644	0.82237	0.0849325		141	372.333	123.333	52.6667	57	23.6667	95	42.6667		142	373.333	124.333	53.6667	58	24.6667	96	43.6667
EAY15894		6.31255	2.65822	4.51589	7.40861	0.00649126	2.18767	0.82237	0.0849325		19.3333	114.333	172	102	1522.67	247	12.3333	812.667		20.3333	115.333	173	103	1523.67	248	13.3333	813.667
EAY10324		3.47947	1.79887	2.89633	7.41707	0.0064608	2.18971	0.82237	0.0849325		8	30.3333	7.33333	153.333	20.6667	129.667	368.333	183.667		9	31.3333	8.33333	154.333	21.6667	130.667	369.333	184.667
EAY16215	TVAG_341090	0.395786	-1.33721	7.47061	7.42465	0.00643362	2.19154	0.82237	0.0849325		3357.67	3373	6308	2510.33	2008	604	1853	1686.67		3358.67	3374	6309	2511.33	2009	605	1854	1687.67
EAX81809	TVAG_529020	4.66667	2.22239	-1.5855	7.42915	0.00641756	2.19263	0.82237	0.0849325		0	0	0	0	0	14.6667	0	0		1	1	1	1	1	15.6667	1	1
EAY12450		4.16602	2.05867	2.51408	7.43135	0.00640972	2.19316	0.82237	0.0849325		1	30.6667	24.6667	112.333	251.333	27	251.333	185.667		2	31.6667	25.6667	113.333	252.333	28	252.333	186.667
EAX94917		5.17442	2.3714	0.312272	7.39201	0.00655142	2.18366	0.824003	0.0840712		6.33333	4	4	10.3333	97	6	23.3333	18		7.33333	5	5	11.3333	98	7	24.3333	19
EAY17098		3.25708	1.70358	4.93047	7.38284	0.00658492	2.18145	0.824808	0.0836469		206	162.333	178.333	603.333	1147.33	90.6667	1484.67	1032		207	163.333	179.333	604.333	1148.33	91.6667	1485.67	1033
EAX87192	TVAG_313650	20.1176	4.33039	-0.40269	7.38564	0.00657467	2.18213	0.824808	0.0836469		0.333333	0	0	1.33333	0	0	110	0		1.33333	1	1	2.33333	1	1	111	1
EAX64785	TVAG_567750	0.155844	-2.68182	-1.65879	7.37054	0.00663008	2.17848	0.82876	0.081571		0	0	21.6667	0	0	0	0	0		1	1	22.6667	1	1	1	1	1
EAX68209	TVAG_505960	4	2	-2.3548	7.35439	0.00668993	2.17458	0.831121	0.0803357		0	0	0	0	11.6667	0.333333	0	0		1	1	1	1	12.6667	1.33333	1	1
EAX87028	TVAG_052250	0.024974	-5.32343	2.81802	7.35685	0.00668077	2.17517	0.831121	0.0803357		2.66667	0.333333	1	1273.33	13.6667	10	2.33333	2		3.66667	1.33333	2	1274.33	14.6667	11	3.33333	3
EAX98391		2.50033	1.32212	3.81219	7.35997	0.0066692	2.17593	0.831121	0.0803357		78.3333	60.6667	31.3333	338	170	206.333	385	515.667		79.3333	61.6667	32.3333	339	171	207.333	386	516.667
EAX98958	TVAG_321180	0.115819	-3.11005	0.233137	7.34757	0.00671535	2.17293	0.83258	0.0795739		0	104.333	7.66667	2	2	1	2.66667	4		1	105.333	8.66667	3	3	2	3.66667	5
EAY04531	TVAG_244320	4.8	2.26303	-1.91138	7.33465	0.0067638	2.16981	0.836883	0.0773352		0	1	0	0	13.6667	2	0	4.33333		1	2	1	1	14.6667	3	1	5.33333
EAY02316	TVAG_275900	9.36691	3.22757	1.65997	7.29663	0.00690839	2.16062	0.841096	0.0751542		25.6667	6.66667	3.33333	6.66667	408.667	8.33333	4	9		26.6667	7.66667	4.33333	7.66667	409.667	9.33333	5	10
EAY07918	TVAG_064650	0.357522	-1.4839	7.56838	7.29819	0.0069024	2.161	0.841096	0.0751542		5264	7970.33	2011.33	2591.67	1877.33	591.333	2836.67	1069.33		5265	7971.33	2012.33	2592.67	1878.33	592.333	2837.67	1070.33
EAY13462	TVAG_206300	0.41905	-1.2548	9.83002	7.29922	0.00689845	2.16125	0.841096	0.0751542		23758.7	27102.7	17386.3	13877.7	10788.3	2900.67	12325	8398.33		23759.7	27103.7	17387.3	13878.7	10789.3	2901.67	12326	8399.33
EAY18742		3.21947	1.68682	3.29768	7.30302	0.00688389	2.16217	0.841096	0.0751542		50.6667	26.6667	38.3333	257	339	37.3333	503.333	329		51.6667	27.6667	39.3333	258	340	38.3333	504.333	330
EAY04204	TVAG_298220	8.28085	3.04978	3.22435	7.30775	0.00686578	2.16331	0.841096	0.0751542		93	21	0.666667	38	2.33333	64.3333	621.333	605.333		94	22	1.66667	39	3.33333	65.3333	622.333	606.333
EAX98085	TVAG_415090	4.53846	2.1822	-2.23397	7.30869	0.0068622	2.16354	0.841096	0.0751542		0	0	0	0.333333	1.66667	0	0	14		1	1	1	1.33333	2.66667	1	1	15
EAY05648		0.248668	-2.00771	0.877782	7.31013	0.0068567	2.16388	0.841096	0.0751542		39	70.6667	17.6667	56.3333	5	6	17.6667	14		40	71.6667	18.6667	57.3333	6	7	18.6667	15
EAY12465	TVAG_128790	0.416742	-1.26277	8.51521	7.31704	0.00683038	2.16556	0.841096	0.0751542		8489	7664.67	10715	5648.67	5178.33	1116.67	4461.33	2792.67		8490	7665.67	10716	5649.67	5179.33	1117.67	4462.33	2793.67
EAX87047	TVAG_350670	3.91667	1.96963	-1.83729	7.28919	0.00693708	2.15882	0.842904	0.0742218		0	0	0	0	0	11.6667	0	0		1	1	1	1	1	12.6667	1	1
EAY10320	TVAG_491780	5.57895	2.47999	-1.3782	7.27805	0.00698021	2.15613	0.843096	0.0741228		0	0	1	1.33333	0	7	19.3333	5		1	1	2	2.33333	1	8	20.3333	6
EAY08096		2.56491	1.35891	2.00294	7.28122	0.00696792	2.1569	0.843096	0.0741228		7.66667	23.6667	22.3333	37.3333	54	108.667	31.3333	45.6667		8.66667	24.6667	23.3333	38.3333	55	109.667	32.3333	46.6667
EAY02894		3.68343	1.88105	1.74309	7.2819	0.00696528	2.15706	0.843096	0.0741228		25.3333	18.6667	18	46.6667	89.6667	9.33333	187	125		26.3333	19.6667	19	47.6667	90.6667	10.3333	188	126
EAX93548		2.92098	1.54645	3.11907	7.25372	0.00707543	2.15025	0.851219	0.0699584		47.3333	26.6667	31.3333	232.333	408.667	48.3333	252	285		48.3333	27.6667	32.3333	233.333	409.667	49.3333	253	286
EAX99568		0.416889	-1.26227	8.39587	7.25554	0.00706824	2.15069	0.851219	0.0699584		6442.33	12197	7268.33	4242.67	5285.67	831.333	3888	2562		6443.33	12198	7269.33	4243.67	5286.67	832.333	3889	2563
EAX93587		0.380615	-1.3936	3.61552	7.24925	0.00709307	2.14917	0.851658	0.0697349		97.3333	297.667	495.667	233.333	74.6667	15.3333	53.6667	281.667		98.3333	298.667	496.667	234.333	75.6667	16.3333	54.6667	282.667
EAY07899		2.94885	1.56015	4.19156	7.24446	0.00711203	2.14801	0.852253	0.0694312		86.6667	131.333	98.3333	390	419.333	101.667	940.667	629		87.6667	132.333	99.3333	391	420.333	102.667	941.667	630
EAY02364		4.47603	2.16222	1.74104	7.23255	0.00715936	2.14513	0.85624	0.0674047		15	10	20.3333	48	77.6667	9.66667	296	48.3333		16	11	21.3333	49	78.6667	10.6667	297	49.3333
EAY23380		3.32285	1.73242	3.32802	7.21451	0.00723166	2.14076	0.856473	0.0672862		111.333	13.3333	3.33333	111.667	37	219.333	188.667	360.667		112.333	14.3333	4.33333	112.667	38	220.333	189.667	361.667
EAY06716		0.398864	-1.32603	10.421	7.2176	0.00721921	2.14151	0.856473	0.0672862		44771	37213.3	15677.7	34608.7	22489	3853.33	16459.7	9953.67		44772	37214.3	15678.7	34609.7	22490	3854.33	16460.7	9954.67
EAX95089		0.385681	-1.37452	5.48027	7.21771	0.00721876	2.14154	0.856473	0.0672862		599	1495.33	1453.33	419.667	814.667	76	322.667	314.333		600	1496.33	1454.33	420.667	815.667	77	323.667	315.333
EAX88735	TVAG_420820	0.429415	-1.21956	3.76087	7.22255	0.00719935	2.14271	0.856473	0.0672862		187.667	240.667	448	361.667	238	29.3333	127.333	134.667		188.667	241.667	449	362.667	239	30.3333	128.333	135.667
EAY08477	TVAG_145570	0.41517	-1.26822	9.25422	7.22613	0.00718499	2.14357	0.856473	0.0672862		16657	14528.3	14080.3	9552	7618.33	2052.67	8140.33	4945		16658	14529.3	14081.3	9553	7619.33	2053.67	8141.33	4946
EAY07850		3.50179	1.80809	3.99112	7.20038	0.00728883	2.13734	0.861568	0.0647104		151.333	139	57.3333	207.667	873.667	42	464	575		152.333	140	58.3333	208.667	874.667	43	465	576
EAY13496		3.80904	1.92943	4.83063	7.19478	0.0073116	2.13599	0.862584	0.0641986		186.667	122.667	59	615.667	331.333	92.3333	2108.33	1227.33		187.667	123.667	60	616.667	332.333	93.3333	2109.33	1228.33
EAY13984	TVAG_491220	7.73684	2.95174	-0.483406	7.18564	0.00734893	2.13378	0.865312	0.0628273		0	1.66667	0.333333	6.66667	10	0.333333	38	45.6667		1	2.66667	1.33333	7.66667	11	1.33333	39	46.6667
EAY11871		0.253745	-1.97855	1.96732	7.1712	0.00740833	2.13028	0.870621	0.0601707		50.3333	39.6667	243	19	62.3333	0.666667	19	4.33333		51.3333	40.6667	244	20	63.3333	1.66667	20	5.33333
EAX83934	TVAG_244140	0.364286	-1.45686	3.71926	7.15527	0.00747442	2.12642	0.871657	0.0596542		165.333	648	187.667	208.333	155	40.3333	155.667	87		166.333	649	188.667	209.333	156	41.3333	156.667	88
EAY20527	TVAG_238990	3.25	1.70044	-2.55749	7.15634	0.00746996	2.12668	0.871657	0.0596542		0	0	0	0	0	0	0.666667	8.33333		1	1	1	1	1	1	1.66667	9.33333
EAY23760	TVAG_120980	0.405326	-1.30285	7.87378	7.15993	0.00745502	2.12755	0.871657	0.0596542		4197.67	8658	5216.33	2653	2737	749	2409.33	2502.67		4198.67	8659	5217.33	2654	2738	750	2410.33	2503.67
EAY20240		0.389948	-1.35865	2.07106	7.16318	0.00744152	2.12834	0.871657	0.0596542		63.3333	94.3333	145.667	77.3333	39.6667	5.66667	17	83.6667		64.3333	95.3333	146.667	78.3333	40.6667	6.66667	18	84.6667
EAY20113		4.58824	2.19794	-1.0609	7.14617	0.00751244	2.12422	0.872747	0.0591116		0.333333	1	0.666667	5.33333	9.66667	3	19.6667	15.6667		1.33333	2	1.66667	6.33333	10.6667	4	20.6667	16.6667
EAX99919	TVAG_159390	0.206787	-2.27378	3.40598	7.147	0.00750894	2.12442	0.872747	0.0591116		17.6667	41	859	21.3333	122.333	5.66667	43	20		18.6667	42	860	22.3333	123.333	6.66667	44	21
EAX71580	TVAG_552750	5.23077	2.38702	-2.06956	7.13393	0.00756387	2.12126	0.875381	0.0578029		0	0	0	0.333333	18	0	0.333333	0.333333		1	1	1	1.33333	19	1	1.33333	1.33333
EAX93055	TVAG_220300	0.40315	-1.31061	9.24269	7.13449	0.00756153	2.12139	0.875381	0.0578029		12555.7	18041.7	14233.3	8968.33	7121.33	2249.67	6276	6039.67		12556.7	18042.7	14234.3	8969.33	7122.33	2250.67	6277	6040.67
EAX99465		0.334375	-1.58046	2.20655	7.12673	0.00759431	2.11951	0.875575	0.0577068		43.3333	57	249.333	73	17	1.33333	20.6667	99.6667		44.3333	58	250.333	74	18	2.33333	21.6667	100.667
EAX94478		0.344454	-1.53762	4.39178	7.12825	0.00758788	2.11988	0.875575	0.0577068		187.667	192.333	1282.67	211.667	158.333	9.66667	90.6667	384.333		188.667	193.333	1283.67	212.667	159.333	10.6667	91.6667	385.333
EAY22043		3.29969	1.72233	3.14189	7.10951	0.00766759	2.11534	0.882352	0.054358		99.3333	23.3333	24.3333	176	171.667	39	416.667	447.667		100.333	24.3333	25.3333	177	172.667	40	417.667	448.667
EAY21423		0.38714	-1.36907	8.18971	7.10484	0.00768759	2.11421	0.882985	0.0540465		5797.67	6657.67	9165.67	3958.33	2599.33	1166.33	3064.67	3070		5798.67	6658.67	9166.67	3959.33	2600.33	1167.33	3065.67	3071
EAX93627	TVAG_336130	0.0452381	-4.46632	3.84188	7.09802	0.00771692	2.11256	0.883021	0.0540288		495.667	268	370.667	541.667	1	63.3333	3	4.66667		496.667	269	371.667	542.667	2	64.3333	4	5.66667
EAX92175		2.96802	1.5695	3.57214	7.09899	0.00771275	2.11279	0.883021	0.0540288		6.33333	35	14	211.667	11.6667	321	260.667	207		7.33333	36	15	212.667	12.6667	322	261.667	208
EAY11662		0.273938	-1.86808	2.76975	7.03072	0.00801233	2.09624	0.883607	0.053741		84.3333	400.667	60.6667	101.333	24	27	67.6667	55.6667		85.3333	401.667	61.6667	102.333	25	28	68.6667	56.6667
EAY18805		3.06418	1.6155	2.0773	7.03159	0.00800841	2.09645	0.883607	0.053741		34.3333	20.6667	21.3333	80.6667	144	16.6667	167.333	161.333		35.3333	21.6667	22.3333	81.6667	145	17.6667	168.333	162.333
EAX86097	TVAG_264590	0.153846	-2.70044	-1.73663	7.03273	0.00800332	2.09673	0.883607	0.053741		0	22	0	0	0	0	0	0		1	23	1	1	1	1	1	1
EAY02345	TVAG_054430	0.146341	-2.77259	-1.68215	7.03593	0.00798903	2.09751	0.883607	0.053741		0	23.3333	0	0	0	0	0	0		1	24.3333	1	1	1	1	1	1
EAX96202	TVAG_000310	8.70145	3.12126	6.08023	7.03901	0.00797532	2.09825	0.883607	0.053741		8.33333	19.3333	294.333	19	2	2558.67	429.333	8		9.33333	20.3333	295.333	20	3	2559.67	430.333	9
EAX92048	TVAG_441110	4.38462	2.13245	-2.26039	7.04043	0.00796901	2.0986	0.883607	0.053741		0	0.333333	0	0	0	0	1.66667	13.3333		1	1.33333	1	1	1	1	2.66667	14.3333
EAY23390		0.426499	-1.22939	8.12683	7.04141	0.00796462	2.09883	0.883607	0.053741		5876.67	8106	6966	3566.33	3439.67	911	3221	2881.67		5877.67	8107	6967	3567.33	3440.67	912	3222	2882.67
EAX89440	TVAG_327820	3.64286	1.86507	-2.25635	7.04411	0.00795262	2.09949	0.883607	0.053741		0	0	0	0.666667	9.66667	1	2.33333	0		1	1	1	1.66667	10.6667	2	3.33333	1
EAY09218		0.135514	-2.88349	4.89991	7.04594	0.00794452	2.09993	0.883607	0.053741		148.333	15	2390	153.333	140.333	78.6667	106.333	38		149.333	16	2391	154.333	141.333	79.6667	107.333	39
EAY00790		3.125	1.64386	1.48784	7.05007	0.00792621	2.10093	0.883607	0.053741		21.3333	20.6667	16.3333	36.3333	80.3333	17	100.333	106.667		22.3333	21.6667	17.3333	37.3333	81.3333	18	101.333	107.667
EAX85662	TVAG_091330	0.230132	-2.11946	3.26901	7.05043	0.00792463	2.10102	0.883607	0.053741		367.667	547.333	8.66667	79	13.3333	12	35.3333	167		368.667	548.333	9.66667	80	14.3333	13	36.3333	168
EAX96760		2.98144	1.57601	4.47826	7.05287	0.00791383	2.10161	0.883607	0.053741		113	106	204.333	416.667	886.667	117.667	859.667	648.333		114	107	205.333	417.667	887.667	118.667	860.667	649.333
EAX90066	TVAG_371270	0.434279	-1.20331	8.41425	7.05353	0.0079109	2.10177	0.883607	0.053741		8580.67	10534.3	5383.67	6583.33	4103.67	1106.33	4644	3642		8581.67	10535.3	5384.67	6584.33	4104.67	1107.33	4645	3643
EAY23141	TVAG_183780	0.12402	-3.01136	7.39364	7.05363	0.00791047	2.1018	0.883607	0.053741		1023.33	956	11489.3	2041	235.333	779.333	506.667	398.667		1024.33	957	11490.3	2042	236.333	780.333	507.667	399.667
EAY09369		0.227915	-2.13343	1.04691	7.06252	0.00787133	2.10395	0.883607	0.053741		1	40.6667	128.667	14.3333	13.3333	0.333333	9.33333	16		2	41.6667	129.667	15.3333	14.3333	1.33333	10.3333	17
EAY21541	TVAG_013060	0.459531	-1.12177	7.4826	7.06885	0.00784357	2.10549	0.883607	0.053741		5212	4550.67	3426	3655.67	3113	137.333	2554.67	1933.33		5213	4551.67	3427	3656.67	3114	138.333	2555.67	1934.33
EAX73608	TVAG_560610	5.6413	2.49603	1.92531	7.07474	0.0078178	2.10692	0.883607	0.053741		12.6667	0	12.3333	63	339.667	8.33333	37.3333	129.667		13.6667	1	13.3333	64	340.667	9.33333	38.3333	130.667
EAX85034	TVAG_065490	2.8848	1.52847	3.61436	7.07631	0.00781098	2.10729	0.883607	0.053741		57	47	78	303	434.667	61.6667	435.333	475		58	48	79	304	435.667	62.6667	436.333	476
EAY09101	TVAG_230610	0.263667	-1.92321	6.12584	7.0878	0.00776106	2.11008	0.883607	0.053741		358.667	311	5205.33	352.333	213.333	44	1228.67	153		359.667	312	5206.33	353.333	214.333	45	1229.67	154
EAY14669		3.375	1.75489	2.25116	7.0931	0.00773814	2.11136	0.883607	0.053741		32.6667	13.6667	29.6667	93.3333	186	13.6667	177.333	204		33.6667	14.6667	30.6667	94.3333	187	14.6667	178.333	205
EAY23506		0.409938	-1.28652	9.25659	7.0086	0.0081119	2.09088	0.886557	0.0522934		17580.7	17419.3	9661	11357.3	7934	2218.33	7142.33	5667		17581.7	17420.3	9662	11358.3	7935	2219.33	7143.33	5668
EAY09578		4.22885	2.08026	3.466	7.00971	0.00810687	2.09115	0.886557	0.0522934		124	17.3333	69.6667	131.667	208.333	25	747.667	481		125	18.3333	70.6667	132.667	209.333	26	748.667	482
EAY00190		6.03922	2.59436	0.61516	7.0098	0.00810648	2.09117	0.886557	0.0522934		13.6667	1.33333	4.66667	10.3333	108.667	1.33333	39	52.3333		14.6667	2.33333	5.66667	11.3333	109.667	2.33333	40	53.3333
EAX95498	TVAG_054770	2.91667	1.54432	-2.57286	7.01145	0.008099	2.09157	0.886557	0.0522934		0	0	0	0	0	1	6.66667	0		1	1	1	1	1	2	7.66667	1
EAY18583		0.42211	-1.24431	9.092	7.01702	0.00807385	2.09292	0.886557	0.0522934		13178.7	12412.7	13904	9124.67	7434	1853.33	6673.67	4559.67		13179.7	12413.7	13905	9125.67	7435	1854.33	6674.67	4560.67
EAX93817	TVAG_054220	0.0623811	-4.00275	3.19394	7.00128	0.00814516	2.0891	0.888596	0.0512958		1.33333	362.667	500.667	7.66667	5.66667	27.6667	5.66667	11.6667		2.33333	363.667	501.667	8.66667	6.66667	28.6667	6.66667	12.6667
EAY15682		3.07451	1.62036	3.58448	6.99076	0.00819315	2.08655	0.892232	0.049522		40.3333	78	94.3333	239.667	374.333	53.3333	439	532.333		41.3333	79	95.3333	240.667	375.333	54.3333	440	533.333
EAY11336		0.274568	-1.86477	5.07036	6.98221	0.00823237	2.08448	0.894903	0.0482241		1490.33	727.333	331	1168.33	76.3333	49.6667	32	859.667		1491.33	728.333	332	1169.33	77.3333	50.6667	33	860.667
EAX96634		0.319038	-1.6482	8.67206	6.96143	0.00832855	2.07943	0.895761	0.047808		21447.3	9688.33	1605.33	10330.3	5666	680.667	6166.33	1225.67		21448.3	9689.33	1606.33	10331.3	5667	681.667	6167.33	1226.67
EAX89369	TVAG_439890	2.95126	1.56133	2.28769	6.96232	0.00832441	2.07965	0.895761	0.047808		35.6667	18	35	92	180.667	26.6667	221.333	112.333		36.6667	19	36	93	181.667	27.6667	222.333	113.333
EAX92767		3.4	1.76553	-1.93182	6.96275	0.00832239	2.07975	0.895761	0.047808		0	0.333333	0	2.33333	5.33333	2	6.33333	5		1	1.33333	1	3.33333	6.33333	3	7.33333	6
EAX64515	TVAG_515580	0.214286	-2.22239	-2.07798	6.96396	0.00831677	2.08005	0.895761	0.047808		0	14.6667	0	0	0	0	0	0		1	15.6667	1	1	1	1	1	1
EAX90180	TVAG_375710	2.66667	1.41504	-2.68148	6.96912	0.00829284	2.0813	0.895761	0.047808		0	0	0	0	0	0	4.66667	2		1	1	1	1	1	1	5.66667	3
EAX69033	TVAG_596930	0.324324	-1.62449	-2.40547	6.97352	0.00827244	2.08237	0.895761	0.047808		0	0	8.33333	0	0	0	0	0		1	1	9.33333	1	1	1	1	1
EAX99899	TVAG_222600	8.4375	3.07682	0.706412	6.94411	0.00840955	2.07523	0.896552	0.0474244		13.6667	4.33333	4.66667	0	42	5.66667	9.66667	163.667		14.6667	5.33333	5.66667	1	43	6.66667	10.6667	164.667
EAY02413		0.403855	-1.30809	9.29356	6.94642	0.0083987	2.07579	0.896552	0.0474244		14206.3	23953.3	6529.67	15079	9317	1718.33	8848.33	4251.67		14207.3	23954.3	6530.67	15080	9318	1719.33	8849.33	4252.67
EAX93255	TVAG_338540	4.5	2.16993	-2.27595	6.94805	0.00839105	2.07618	0.896552	0.0474244		0	0	0	0	14	0	0	0		1	1	1	1	15	1	1	1
EAY02309	TVAG_275830	0.193182	-2.37197	-1.5844	6.94984	0.00838268	2.07662	0.896552	0.0474244		9.66667	8.33333	1.66667	5.66667	0	1.66667	0	0		10.6667	9.33333	2.66667	6.66667	1	2.66667	1	1
EAX86702	TVAG_242270	0.25	-2	-2.42465	6.95389	0.0083637	2.0776	0.896552	0.0474244		0	0	0	12	0	0	0	0		1	1	1	13	1	1	1	1
EAX82539	TVAG_484810	0.11399	-3.13303	-0.594651	6.92168	0.0085157	2.06978	0.898429	0.0465164		0	48.6667	8.66667	3	0	0.666667	2.66667	0		1	49.6667	9.66667	4	1	1.66667	3.66667	1
EAY00169	TVAG_052170	0.188679	-2.40599	-1.33406	6.92341	0.00850746	2.0702	0.898429	0.0465164		0	23	6	2.33333	0.666667	0	0.666667	1.33333		1	24	7	3.33333	1.66667	1	1.66667	2.33333
EAX78298	TVAG_269750	0.352941	-1.5025	-2.55113	6.92468	0.00850143	2.07051	0.898429	0.0465164		7.33333	0	0	0	0	0	0	0		8.33333	1	1	1	1	1	1	1
EAY02442	TVAG_044600	0.171975	-2.53973	-0.763896	6.92946	0.00847874	2.07167	0.898429	0.0465164		0.666667	13.3333	31.6667	2.66667	0.333333	0.333333	3.66667	0.666667		1.66667	14.3333	32.6667	3.66667	1.33333	1.33333	4.66667	1.66667
EAY07505		3.48223	1.80001	3.28054	6.93173	0.00846797	2.07222	0.898429	0.0465164		24	16	61.6667	241.333	388.333	38.6667	439.333	338		25	17	62.6667	242.333	389.333	39.6667	440.333	339
EAY10906	TVAG_259910	3.27778	1.71272	-1.78578	6.93541	0.00845055	2.07311	0.898429	0.0465164		0	0	0.666667	1.33333	2	8	2.33333	3.33333		1	1	1.66667	2.33333	3	9	3.33333	4.33333
EAY13380	TVAG_424110	8.23913	3.04249	-0.153944	6.91847	0.008531	2.069	0.898485	0.046489		0.333333	2.33333	1.33333	7.33333	14.3333	0.333333	99.6667	8		1.33333	3.33333	2.33333	8.33333	15.3333	1.33333	100.667	9
EAY07890		0.410149	-1.28578	9.43499	6.91462	0.00854937	2.06807	0.898865	0.0463055		23903.7	19935.3	7822	12962.7	8169.67	2292.67	9144.67	6896		23904.7	19936.3	7823	12963.7	8170.67	2293.67	9145.67	6897
EAY07930	TVAG_064780	5.5	2.45943	-1.83708	6.88953	0.00867022	2.06197	0.899147	0.0461692		0	1.33333	0	0	4.66667	0	2	18.6667		1	2.33333	1	1	5.66667	1	3	19.6667
EAY10086	TVAG_329730	0.311111	-1.6845	-2.31335	6.89	0.00866793	2.06208	0.899147	0.0461692		8	1.33333	0	1.66667	0	0	0.333333	0.333333		9	2.33333	1	2.66667	1	1	1.33333	1.33333
EAX97900		0.404821	-1.30464	8.99326	6.89419	0.00864761	2.0631	0.899147	0.0461692		13801	15240	8930.67	8248	7403	1807.67	5422	4075.67		13802	15241	8931.67	8249	7404	1808.67	5423	4076.67
EAY01433		0.372083	-1.42631	6.66803	6.89829	0.00862782	2.0641	0.899147	0.0461692		1681.33	3063	2930.33	1219	941.333	420.667	934.667	1010		1682.33	3064	2931.33	1220	942.333	421.667	935.667	1011
EAX97990		0.152828	-2.71002	3.76735	6.8984	0.00862731	2.06412	0.899147	0.0461692		30	28.6667	958.667	263.333	56	49.6667	35.6667	51		31	29.6667	959.667	264.333	57	50.6667	36.6667	52
EAY14500		5.6263	2.49219	1.96363	6.89892	0.00862479	2.06425	0.899147	0.0461692		11.3333	23.3333	11.6667	46	36.3333	12.6667	17.6667	471.333		12.3333	24.3333	12.6667	47	37.3333	13.6667	18.6667	472.333
EAX86645	TVAG_115160	0.255319	-1.96963	-2.18387	6.90272	0.00860645	2.06518	0.899147	0.0461692		0	0	11.6667	0	0	0	0	0		1	1	12.6667	1	1	1	1	1
EAY03430		6.28889	2.65281	0.522637	6.90608	0.0085903	2.06599	0.899147	0.0461692		2.66667	3	0.666667	19.6667	154	3.33333	16	11.3333		3.66667	4	1.66667	20.6667	155	4.33333	17	12.3333
EAY17754	TVAG_015830	5	2.32193	-2.00051	6.8812	0.00871072	2.05995	0.901811	0.0448845		0	0	0.333333	0.666667	1	0	18	2		1	1	1.33333	1.66667	2	1	19	3
EAY10751		0.413172	-1.27519	9.1208	6.87743	0.00872911	2.05903	0.902181	0.0447062		14069	15789.7	12501	6816	5589.33	2015	6934.67	5776.67		14070	15790.7	12502	6817	5590.33	2016	6935.67	5777.67
EAY21555	TVAG_013200	4.25	2.08746	-2.32206	6.87178	0.00875676	2.05766	0.903504	0.0440698		0	0	0	0	13	0	0	0		1	1	1	1	14	1	1	1
EAX94308	TVAG_466660	0.361544	-1.46776	6.72229	6.86123	0.00880859	2.05509	0.905782	0.0429761		3713.33	4691.67	401	1485.67	960.667	216.667	1429.67	1111.33		3714.33	4692.67	402	1486.67	961.667	217.667	1430.67	1112.33
EAY16244	TVAG_341380	0.421927	-1.24493	9.22936	6.8631	0.00879938	2.05555	0.905782	0.0429761		22688.3	16848	7923.33	7613	5975.33	1733	7148.33	8377.67		22689.3	16849	7924.33	7614	5976.33	1734	7149.33	8378.67
EAX93549		3.23044	1.69173	5.29626	6.84362	0.00889585	2.05081	0.913212	0.0394283		381.333	89	142	879.333	1446.33	150	2064.67	1166.67		382.333	90	143	880.333	1447.33	151	2065.67	1167.67
EAY08522		0.456664	-1.1308	9.26217	6.83398	0.00894399	2.04847	0.916609	0.0378161		7837.67	19175.7	16617.3	10500	8443	1495	7507.33	7272		7838.67	19176.7	16618.3	10501	8444	1496	7508.33	7273
EAX94964		0.240426	-2.05634	0.599628	6.82562	0.00898595	2.04644	0.917818	0.0372432		47.6667	42.3333	16.3333	46.3333	2	4.33333	19	8.33333		48.6667	43.3333	17.3333	47.3333	3	5.33333	20	9.33333
EAX94420		0.463928	-1.10803	2.88607	6.82804	0.00897379	2.04702	0.917818	0.0372432		151	170	196.667	143.667	142.667	10.3333	71	80.6667		152	171	197.667	144.667	143.667	11.3333	72	81.6667
EAX78145	TVAG_504440	0.4	-1.32193	-2.65646	6.80639	0.0090832	2.04176	0.926197	0.0332966		5	0	0	1	0	0	0	0		6	1	1	2	1	1	1	1
EAY07723		0.299674	-1.73853	4.75845	6.80123	0.00910949	2.04051	0.927325	0.0327681		307	196.667	1585.33	260.667	135.667	89.3333	293	183.333		308	197.667	1586.33	261.667	136.667	90.3333	294	184.333
EAY16473		0.4634	-1.10967	2.57697	6.73741	0.00944117	2.02497	0.928483	0.032226		167.667	105.333	140.667	119.667	92.3333	13	51.6667	88		168.667	106.333	141.667	120.667	93.3333	14	52.6667	89
EAY18779		0.327763	-1.60927	1.52437	6.73819	0.00943703	2.02516	0.928483	0.032226		27.6667	48.6667	149.667	29.3333	11	1.33333	10.3333	58.3333		28.6667	49.6667	150.667	30.3333	12	2.33333	11.3333	59.3333
EAX84285	TVAG_284770	5.26936	2.39763	1.8667	6.74249	0.00941431	2.02621	0.928483	0.032226		7	2	5.66667	80.3333	245.333	2	86.3333	184		8	3	6.66667	81.3333	246.333	3	87.3333	185
EAY02583	TVAG_254840	0.260088	-1.94293	4.89736	6.74325	0.00941028	2.0264	0.928483	0.032226		1694.33	1091	45.6667	205	154.667	73	329.333	229.667		1695.33	1092	46.6667	206	155.667	74	330.333	230.667
EAY23446		0.427748	-1.22517	4.33639	6.74469	0.00940273	2.02675	0.928483	0.032226		286	289.667	806.667	463.667	136.667	29.6667	149	472		287	290.667	807.667	464.667	137.667	30.6667	150	473
EAY01405	TVAG_230090	3.42857	1.77761	-2.36562	6.74627	0.0093944	2.02713	0.928483	0.032226		0	0.333333	0	0.333333	3	0	0.666667	8.33333		1	1.33333	1	1.33333	4	1	1.66667	9.33333
EAY04412		0.390312	-1.3573	4.39035	6.75219	0.00936326	2.02857	0.928483	0.032226		145.667	554.333	839.667	369.333	165.667	25.6667	83.6667	467.667		146.667	555.333	840.667	370.333	166.667	26.6667	84.6667	468.667
EAX89319	TVAG_017680	3.23128	1.6921	2.96685	6.75262	0.00936103	2.02868	0.928483	0.032226		58.6667	38	30.6667	171.333	248.333	19	287	419.667		59.6667	39	31.6667	172.333	249.333	20	288	420.667
EAY16279	TVAG_423320	0.416838	-1.26244	9.27288	6.75479	0.00934963	2.02921	0.928483	0.032226		11058	15761	16388.3	11513.3	6628.67	2437.67	7561.67	6179.33		11059	15762	16389.3	11514.3	6629.67	2438.67	7562.67	6180.33
EAX90218	TVAG_415980	0.201373	-2.31206	0.370737	6.75936	0.00932572	2.03032	0.928483	0.032226		60.3333	6.33333	20	55	19	0.666667	1.33333	4.33333		61.3333	7.33333	21	56	20	1.66667	2.33333	5.33333
EAX75158	TVAG_564810	0.174129	-2.52177	-0.414617	6.76331	0.00930511	2.03128	0.928483	0.032226		1.66667	15.6667	44	1.66667	0	0.333333	3.66667	3.66667		2.66667	16.6667	45	2.66667	1	1.33333	4.66667	4.66667
EAY09852	TVAG_259330	0.332183	-1.58995	5.98566	6.76907	0.00927512	2.03268	0.928483	0.032226		258.333	1011.67	3758.33	667.333	295.667	43	171	1379.67		259.333	1012.67	3759.33	668.333	296.667	44	172	1380.67
EAY18647	TVAG_062520	0.341997	-1.54795	7.95354	6.76957	0.00927253	2.0328	0.928483	0.032226		3188	3755.33	10925.3	3802	2246.33	1042.33	2228.67	1891.33		3189	3756.33	10926.3	3803	2247.33	1043.33	2229.67	1892.33
EAX90824		0.346512	-1.52902	2.17645	6.7699	0.00927081	2.03288	0.928483	0.032226		181	92.6667	88.3333	64	50.6667	9.33333	76.6667	8.33333		182	93.6667	89.3333	65	51.6667	10.3333	77.6667	9.33333
EAY19862		4.0285	2.01024	2.14929	6.77346	0.00925233	2.03375	0.928483	0.032226		33.6667	27.6667	14	61	55.6667	15.6667	413.333	76.6667		34.6667	28.6667	15	62	56.6667	16.6667	414.333	77.6667
EAY08057	TVAG_463370	0.292683	-1.77259	-2.40482	6.77535	0.00924254	2.03421	0.928483	0.032226		9.66667	0	0	0	0	0	0	0		10.6667	1	1	1	1	1	1	1
EAX85812	TVAG_537410	3.88662	1.95852	4.82393	6.78007	0.00921815	2.03536	0.928483	0.032226		57.6667	211.333	46.3333	627.333	1619	89.6667	381.333	1585.33		58.6667	212.333	47.3333	628.333	1620	90.6667	382.333	1586.33
EAY02172	TVAG_213720	3.24606	1.69869	2.41758	6.78197	0.00920833	2.03582	0.928483	0.032226		20.6667	66.6667	32.6667	45.3333	294	45.3333	126	80.3333		21.6667	67.6667	33.6667	46.3333	295	46.3333	127	81.3333
EAX85535	TVAG_486510	0.337251	-1.5681	5.54537	6.78215	0.00920738	2.03586	0.928483	0.032226		1579	2138.33	221	595.333	270.667	120	759.333	376.333		1580	2139.33	222	596.333	271.667	121	760.333	377.333
EAY00808	TVAG_304490	0.292683	-1.77259	-2.36449	6.7835	0.00920041	2.03619	0.928483	0.032226		0	9.66667	0	0	0	0	0	0		1	10.6667	1	1	1	1	1	1
EAY19368		3.16686	1.66305	2.91104	6.7943	0.00914495	2.03882	0.928483	0.032226		70	59.3333	28.6667	125.667	172.667	23.6667	352.667	358		71	60.3333	29.6667	126.667	173.667	24.6667	353.667	359
EAY14040		0.190985	-2.38847	1.3043	6.72697	0.0094966	2.02243	0.930927	0.0310844		163.667	0	43.3333	70	23.6667	0	17.6667	8.33333		164.667	1	44.3333	71	24.6667	1	18.6667	9.33333
EAY17017		0.278864	-1.84237	3.69433	6.72832	0.00948941	2.02276	0.930927	0.0310844		132	100	161.667	1222	175.333	29	107.333	136		133	101	162.667	1223	176.333	30	108.333	137
EAY11542		0.439838	-1.18496	9.1599	6.71982	0.00953475	2.02069	0.931666	0.0307399		15757	13268.3	13398	8424	7886	1725	8284.67	4466.67		15758	13269.3	13399	8425	7887	1726	8285.67	4467.67
EAX93123	TVAG_234410	0.363636	-1.45943	-2.54228	6.7204	0.00953164	2.02083	0.931666	0.0307399		0	7	0	0	0	0	0	0		1	8	1	1	1	1	1	1
EAY08719	TVAG_251450	0.351351	-1.50901	-2.4657	6.7089	0.0095933	2.01803	0.934387	0.0294732		0.333333	6.33333	0	1.66667	0	0	0	0.333333		1.33333	7.33333	1	2.66667	1	1	1	1.33333
EAY14408		0.31358	-1.67309	2.03294	6.70991	0.00958785	2.01828	0.934387	0.0294732		112.333	135.333	51.6667	101.667	24.6667	12	7	79.3333		113.333	136.333	52.6667	102.667	25.6667	13	8	80.3333
EAY04114		2.65144	1.40678	2.27725	6.69783	0.00965304	2.01534	0.937207	0.0281646		39.6667	24.6667	26.6667	102	153	29.6667	163.333	172.333		40.6667	25.6667	27.6667	103	154	30.6667	164.333	173.333
EAX96100		0.406926	-1.29716	6.00582	6.70004	0.00964106	2.01588	0.937207	0.0281646		1690	2280.33	1002.67	798	612.333	223.667	836.333	673.667		1691	2281.33	1003.67	799	613.333	224.667	837.333	674.667
EAY14504	TVAG_TEG_DS113269_2_1	2.76923	1.46949	-2.54672	6.68031	0.00974838	2.01107	0.937492	0.0280322		0.333333	0	0	0	1.33333	0.666667	4.33333	1.66667		1.33333	1	1	1	2.33333	1.66667	5.33333	2.66667
EAX85133	TVAG_505880	6.69231	2.7425	-0.47362	6.68276	0.00973496	2.01167	0.937492	0.0280322		0.333333	0	0.666667	8	67.3333	3.33333	7.66667	4.66667		1.33333	1	1.66667	9	68.3333	4.33333	8.66667	5.66667
EAY20037		0.349876	-1.51508	1.50385	6.68357	0.00973054	2.01186	0.937492	0.0280322		73	124.333	24	43.3333	19	6.33333	38.3333	26.3333		74	125.333	25	44.3333	20	7.33333	39.3333	27.3333
EAY17792		2.69628	1.43097	5.25571	6.68375	0.00972959	2.01191	0.937492	0.0280322		235.667	41.3333	175	985	1055.67	411.667	1211.67	1202.33		236.667	42.3333	176	986	1056.67	412.667	1212.67	1203.33
EAX97034		3.03462	1.60151	2.1849	6.68628	0.00971576	2.01252	0.937492	0.0280322		39	39.3333	17	74	113.667	19.3333	221.333	167.667		40	40.3333	18	75	114.667	20.3333	222.333	168.667
EAX97929		2.79267	1.48164	2.94562	6.69085	0.00969088	2.01364	0.937492	0.0280322		28.3333	70.3333	12.6667	175.667	166.667	71	199.667	371.333		29.3333	71.3333	13.6667	176.667	167.667	72	200.667	372.333
EAY00387		3.32358	1.73274	2.43024	6.59688	0.0102158	1.99073	0.937986	0.0278036		33.6667	26.3333	15	126	218.333	11	221	227		34.6667	27.3333	16	127	219.333	12	222	228
EAX70845	TVAG_558870	0.375	-1.41504	-2.59573	6.59753	0.0102121	1.99089	0.937986	0.0278036		6.66667	0	0	0	0	0	0	0		7.66667	1	1	1	1	1	1	1
EAX77296	TVAG_586740	0.140777	-2.82852	-0.527221	6.5995	0.0102007	1.99137	0.937986	0.0278036		11.3333	52.3333	0	1	3	0	0.666667	2		12.3333	53.3333	1	2	4	1	1.66667	3
EAX76139	TVAG_358500	0.342857	-1.54432	-2.63805	6.59963	0.0102	1.9914	0.937986	0.0278036		0	0	0	7.66667	0	0	0	0		1	1	1	8.66667	1	1	1	1
EAY10668		0.241633	-2.04911	2.79788	6.60276	0.0101821	1.99216	0.937986	0.0278036		199.667	238	4.33333	370.667	16.3333	12.3333	123.667	41		200.667	239	5.33333	371.667	17.3333	13.3333	124.667	42
EAY02344	TVAG_054420	0.461538	-1.11548	-2.71637	6.60361	0.0101772	1.99237	0.937986	0.0278036		0	4.66667	0	0	0	0	0	0		1	5.66667	1	1	1	1	1	1
EAY05353	TVAG_153870	0.461538	-1.11548	-2.71637	6.60361	0.0101772	1.99237	0.937986	0.0278036		0	4.66667	0	0	0	0	0	0		1	5.66667	1	1	1	1	1	1
EAY04951		0.327745	-1.60936	3.16491	6.60365	0.010177	1.99238	0.937986	0.0278036		28	522.333	216	64.6667	138.667	3	54	74		29	523.333	217	65.6667	139.667	4	55	75
EAX78532	TVAG_089340	0.413793	-1.27302	-2.64396	6.6095	0.0101436	1.99381	0.937986	0.0278036		0	5	0.333333	0.333333	0	0	0	0		1	6	1.33333	1.33333	1	1	1	1
EAY13404		2.22914	1.15649	2.92724	6.61166	0.0101313	1.99433	0.937986	0.0278036		50.3333	56	17	108.333	168.667	165	146	41.6667		51.3333	57	18	109.333	169.667	166	147	42.6667
EAY00656	TVAG_TEG_DS113593_1_1	0.0858896	-3.54137	-0.84997	6.61186	0.0101302	1.99438	0.937986	0.0278036		0	50.3333	0	0	0.333333	0.333333	0	0		1	51.3333	1	1	1.33333	1.33333	1	1
EAY21789		0.374377	-1.41744	3.3285	6.6122	0.0101283	1.99447	0.937986	0.0278036		106.333	400.667	302.333	55.6667	90.3333	28	89.3333	113.667		107.333	401.667	303.333	56.6667	91.3333	29	90.3333	114.667
EAY07572		0.280237	-1.83528	4.52066	6.61365	0.01012	1.99482	0.937986	0.0278036		580	1138	164	305	127	103.333	250	129.667		581	1139	165	306	128	104.333	251	130.667
EAX86036	TVAG_289550	0.187097	-2.41814	0.139657	6.61512	0.0101116	1.99518	0.937986	0.0278036		7	2.66667	73	16.6667	12	0.333333	1	2		8	3.66667	74	17.6667	13	1.33333	2	3
EAY03971	TVAG_315010	2.58333	1.36923	-2.70248	6.61517	0.0101114	1.99519	0.937986	0.0278036		0	0	0	0	0	0	1.66667	4.66667		1	1	1	1	1	1	2.66667	5.66667
EAY11303	TVAG_343970	0.427477	-1.22608	8.33435	6.61584	0.0101075	1.99535	0.937986	0.0278036		5488.67	6279	10550	5869.33	3682	1197	3488	3680		5489.67	6280	10551	5870.33	3683	1198	3489	3681
TVAG_315030	TVAG_315030	2.41667	1.27302	-2.70041	6.62987	0.0100282	1.99878	0.937986	0.0278036		0	0	0	0	1.33333	0.666667	2	1.66667		1	1	1	1	2.33333	1.66667	3	2.66667
EAX94582	TVAG_134880	2.76923	1.46949	-2.48425	6.63225	0.0100149	1.99935	0.937986	0.0278036		0.333333	0	0	0	0	2	2	4		1.33333	1	1	1	1	3	3	5
EAY16926		0.270208	-1.88786	2.13941	6.63327	0.0100092	1.9996	0.937986	0.0278036		19	326.333	19.6667	64	38	8.33333	22	44.6667		20	327.333	20.6667	65	39	9.33333	23	45.6667
EAY23260		0.430267	-1.2167	2.31542	6.63661	0.00999039	2.00042	0.937986	0.0278036		84.6667	114.667	120.667	125.333	40.6667	17	73	58.6667		85.6667	115.667	121.667	126.333	41.6667	18	74	59.6667
EAX85300	TVAG_047400	0.0581717	-4.10354	0.19101	6.63942	0.00997466	2.0011	0.937986	0.0278036		0	116.333	0	0	3	0	0	0		1	117.333	1	1	4	1	1	1
EAY13935	TVAG_028880	0.155556	-2.6845	-1.04222	6.64132	0.00996403	2.00156	0.937986	0.0278036		8.33333	28	2	2.66667	0.333333	1.33333	1.33333	0		9.33333	29	3	3.66667	1.33333	2.33333	2.33333	1
EAX86667	TVAG_219390	0.316338	-1.66046	3.76836	6.64357	0.00995144	2.00211	0.937986	0.0278036		53.6667	195	824.333	106.333	189.667	23.3333	42	115.333		54.6667	196	825.333	107.333	190.667	24.3333	43	116.333
EAX91743		0.200702	-2.31688	3.65412	6.64433	0.0099472	2.0023	0.937986	0.0278036		261.333	26.6667	34.6667	1478.67	124.667	16	86.6667	131		262.333	27.6667	35.6667	1479.67	125.667	17	87.6667	132
EAY19302		3.3147	1.72888	5.22538	6.64813	0.009926	2.00323	0.937986	0.0278036		565.333	305.333	86.6667	374.333	1391	160	1604.67	1267.67		566.333	306.333	87.6667	375.333	1392	161	1605.67	1268.67
EAY06970		0.350137	-1.51401	1.99501	6.65105	0.00990976	2.00394	0.937986	0.0278036		85.3333	165	62.6667	46.6667	58	11.6667	31.6667	22		86.3333	166	63.6667	47.6667	59	12.6667	32.6667	23
EAY17659		0.284456	-1.81372	6.27404	6.65226	0.00990301	2.00423	0.937986	0.0278036		286	247.667	5477	759.667	589	157.333	662.667	514		287	248.667	5478	760.667	590	158.333	663.667	515
EAY22291		5.59677	2.4846	0.743629	6.65657	0.00987909	2.00528	0.937986	0.0278036		8	8.66667	2.66667	18	16	2	139.667	69.6667		9	9.66667	3.66667	19	17	3	140.667	70.6667
EAY19827	TVAG_178710	0.452791	-1.14308	9.54373	6.66867	0.00981223	2.00823	0.937986	0.0278036		18030.7	20862	14252.7	13720.3	10168.3	2340.67	10596	7169		18031.7	20863	14253.7	13721.3	10169.3	2341.67	10597	7170
EAX97076		4.53497	2.18109	1.7482	6.67325	0.00978707	2.00935	0.937986	0.0278036		9.33333	0	5.66667	76.3333	239.667	14.6667	67.3333	106.667		10.3333	1	6.66667	77.3333	240.667	15.6667	68.3333	107.667
EAX98698	TVAG_333620	0.435847	-1.19811	9.22914	6.58926	0.0102596	1.98887	0.939178	0.0272522		24142.3	15010.7	5750.67	12136	9365.33	1352	7856	6285		24143.3	15011.7	5751.67	12137	9366.33	1353	7857	6286
EAY05319	TVAG_TEG_DS113452_3_4	0.341463	-1.5502	-2.36578	6.59108	0.0102491	1.98931	0.939178	0.0272522		5	4	0	0.666667	0	0	0	0.666667		6	5	1	1.66667	1	1	1	1.66667
EAY11263		3.93035	1.97466	4.17391	6.5354	0.0105748	1.97573	0.939772	0.0269777		75.6667	80.3333	151.333	291.667	749.667	25.6667	1077	513.667		76.6667	81.3333	152.333	292.667	750.667	26.6667	1078	514.667
EAX98280		3.33333	1.73697	-2.11329	6.53767	0.0105613	1.97628	0.939772	0.0269777		0.666667	0	0.333333	1	5.66667	0.333333	5.66667	4.33333		1.66667	1	1.33333	2	6.66667	1.33333	6.66667	5.33333
EAY17933	TVAG_225590	0.461538	-1.11548	-2.74837	6.53835	0.0105573	1.97645	0.939772	0.0269777		4	0	0	0.666667	0	0	0	0		5	1	1	1.66667	1	1	1	1
EAY08399		5.81028	2.53861	3.37379	6.53839	0.0105571	1.97646	0.939772	0.0269777		14	45	38.6667	151.333	99.6667	38.6667	16	1311.67		15	46	39.6667	152.333	100.667	39.6667	17	1312.67
EAY04108	TVAG_483460	0.232143	-2.10692	-2.0018	6.54001	0.0105475	1.97685	0.939772	0.0269777		0	0	14.3333	0.333333	0	0	0	0.333333		1	1	15.3333	1.33333	1	1	1	1.33333
EAX73664	TVAG_250780	2.83333	1.5025	-2.60225	6.54067	0.0105436	1.97701	0.939772	0.0269777		0	0	0	0	7	0.333333	0	0		1	1	1	1	8	1.33333	1	1
EAX95766		6.86239	2.77871	0.815923	6.54231	0.0105339	1.97741	0.939772	0.0269777		5.66667	0	0.333333	26.3333	3.33333	6.66667	105	130.333		6.66667	1	1.33333	27.3333	4.33333	7.66667	106	131.333
EAX96785	TVAG_216880	0.365201	-1.45324	5.12527	6.54936	0.0104922	1.97913	0.939772	0.0269777		144.667	530	1898	502	315.333	60.6667	165	579.333		145.667	531	1899	503	316.333	61.6667	166	580.333
EAY23108		3.04292	1.60546	2.06089	6.55071	0.0104842	1.97946	0.939772	0.0269777		29	33	23.3333	66	79.6667	22.3333	116.667	250		30	34	24.3333	67	80.6667	23.3333	117.667	251
EAY06677		0.425704	-1.23208	6.69798	6.55096	0.0104828	1.97952	0.939772	0.0269777		2039.33	3015	2835	1073	1192.67	350	972	1298.33		2040.33	3016	2836	1074	1193.67	351	973	1299.33
EAX91204		3.83469	1.93911	4.36201	6.55305	0.0104704	1.98003	0.939772	0.0269777		355.333	22.3333	42.3333	231.333	936	101.667	950.667	520.667		356.333	23.3333	43.3333	232.333	937	102.667	951.667	521.667
EAX83159	TVAG_507290	3.08684	1.62613	4.74667	6.55909	0.010435	1.98151	0.939772	0.0269777		273.667	129.667	72	541.667	1700.33	115.667	489.333	842.333		274.667	130.667	73	542.667	1701.33	116.667	490.333	843.333
EAY03903	TVAG_192020	13.1556	3.7176	0.363001	6.56206	0.0104176	1.98223	0.939772	0.0269777		2	6	0.666667	2.33333	1.33333	1	1	190		3	7	1.66667	3.33333	2.33333	2	2	191
EAX89123	TVAG_008480	3.95683	1.98435	0.669469	6.56684	0.0103896	1.9834	0.939772	0.0269777		12.6667	6.33333	2	21.3333	26	11.6667	103.333	38.3333		13.6667	7.33333	3	22.3333	27	12.6667	104.333	39.3333
EAX80622	TVAG_469580	0.461538	-1.11548	-2.73465	6.56771	0.0103845	1.98361	0.939772	0.0269777		4.33333	0	0.333333	0	0	0	0	0		5.33333	1	1.33333	1	1	1	1	1
EAY18363		4.61585	2.2066	1.09672	6.56956	0.0103738	1.98406	0.939772	0.0269777		21.3333	10	0.666667	18.6667	13.6667	18	167.667	49		22.3333	11	1.66667	19.6667	14.6667	19	168.667	50
EAY16067	TVAG_278330	2.41667	1.27302	-2.696	6.57175	0.010361	1.9846	0.939772	0.0269777		0	0	0	0	2.66667	0.666667	0.333333	2		1	1	1	1	3.66667	1.66667	1.33333	3
EAY19121	TVAG_190150	0.0689332	-3.85866	8.28699	6.57845	0.0103221	1.98623	0.939772	0.0269777		21.3333	22520.7	10177	4.33333	2218.33	6	18.3333	9.33333		22.3333	22521.7	10178	5.33333	2219.33	7	19.3333	10.3333
EAY13191	TVAG_097610	0.464104	-1.10748	6.2144	6.57977	0.0103144	1.98656	0.939772	0.0269777		2138.67	2251.67	1161	1112	941.333	192.333	1109.67	847		2139.67	2252.67	1162	1113	942.333	193.333	1110.67	848
EAY12784	TVAG_401100	3.30769	1.72583	-2.47315	6.58056	0.0103099	1.98675	0.939772	0.0269777		0	0	0	0.333333	0.333333	0	1	9		1	1	1	1.33333	1.33333	1	2	10
EAY16803	TVAG_447620	0.0741758	-3.75291	0.390092	6.52868	0.0106149	1.97409	0.941953	0.0259707		0	0	117.333	0	4	0	1	0		1	1	118.333	1	5	1	2	1
EAY17921		0.3288	-1.60472	7.34032	6.51534	0.0106948	1.97083	0.942177	0.0258676		757	1552	10443	1018.33	1526	349.667	1629.67	1019.67		758	1553	10444	1019.33	1527	350.667	1630.67	1020.67
EAX92980	TVAG_042790	0.140118	-2.83529	1.97723	6.51636	0.0106886	1.97108	0.942177	0.0258676		300.333	117.667	0	30	0.333333	0	50.6667	8.33333		301.333	118.667	1	31	1.33333	1	51.6667	9.33333
EAY15916		3.40351	1.76702	1.82749	6.51641	0.0106884	1.97109	0.942177	0.0258676		51.3333	14	24.3333	20.3333	131	23.3333	140.333	89.3333		52.3333	15	25.3333	21.3333	132	24.3333	141.333	90.3333
EAY20869		0.203028	-2.30025	4.17206	6.52213	0.010654	1.97249	0.942177	0.0258676		165.667	1584	27.3333	46.3333	274.667	12.6667	53	26.6667		166.667	1585	28.3333	47.3333	275.667	13.6667	54	27.6667
EAY15391		3.27378	1.71096	1.68131	6.52319	0.0106477	1.97275	0.942177	0.0258676		33.6667	17.3333	12	48.6667	67.3333	13.3333	165.667	128.333		34.6667	18.3333	13	49.6667	68.3333	14.3333	166.667	129.333
EAX86369	TVAG_019000	0.461538	-1.11548	-2.76263	6.50468	0.0107591	1.96822	0.946474	0.0238913		1.33333	1.33333	0	2	0	0	0	0		2.33333	2.33333	1	3	1	1	1	1
EAY08198		3.0394	1.60378	3.33545	6.48649	0.0108698	1.96378	0.949349	0.0225739		80	34.3333	64	215.333	462	30.6667	389	323		81	35.3333	65	216.333	463	31.6667	390	324
EAX95506	TVAG_054850	0.461538	-1.11548	-2.77398	6.48825	0.010859	1.96421	0.949349	0.0225739		2.33333	0	0	2.33333	0	0	0	0		3.33333	1	1	3.33333	1	1	1	1
EAY10300	TVAG_491570	3.78261	1.91938	-0.986317	6.48935	0.0108522	1.96448	0.949349	0.0225739		1.66667	1	0	1	0.333333	20	3	1.66667		2.66667	2	1	2	1.33333	21	4	2.66667
EAY06302		3.57019	1.836	2.6776	6.48984	0.0108493	1.9646	0.949349	0.0225739		6	22.6667	78.6667	81	257.667	55.3333	233	136.667		7	23.6667	79.6667	82	258.667	56.3333	234	137.667
EAY15215	TVAG_202090	0.388008	-1.36584	11.2081	6.49603	0.0108116	1.96611	0.949349	0.0225739		36762.7	34780.7	107341	26190	30562.7	6153.33	32432	10420		36763.7	34781.7	107342	26191	30563.7	6154.33	32433	10421
EAX92137		0.322469	-1.63277	3.24068	6.4822	0.010896	1.96273	0.950277	0.0221498		13.6667	198	509.667	144	49.3333	6.33333	28.3333	192.333		14.6667	199	510.667	145	50.3333	7.33333	29.3333	193.333
EAY23533	TVAG_071960	4.375	2.12928	-2.01138	6.47706	0.0109276	1.96148	0.951669	0.0215139		0.666667	0	0	0.666667	15.3333	0	2.66667	1.33333		1.66667	1	1	1.66667	16.3333	1	3.66667	2.33333
EAX90624		0.254545	-1.974	-1.31102	6.449	0.0111015	1.95462	0.951837	0.0214374		8	13	3.66667	8	1	0.333333	0	4		9	14	4.66667	9	2	1.33333	1	5
EAX77418	TVAG_578780	2.41667	1.27302	-2.74073	6.44987	0.011096	1.95483	0.951837	0.0214374		0	0	0	0	0	0	3	2.66667		1	1	1	1	1	1	4	3.66667
EAY15902		4.61747	2.2071	1.9364	6.45097	0.0110892	1.9551	0.951837	0.0214374		38	19.3333	25	24.3333	124.333	3	143	236.667		39	20.3333	26	25.3333	125.333	4	144	237.667
EAY09940		4.2381	2.08342	-1.73157	6.45255	0.0110793	1.95549	0.951837	0.0214374		0	0	0	3	1.66667	1.66667	15.3333	7		1	1	1	4	2.66667	2.66667	16.3333	8
EAX86037	TVAG_289560	0.20788	-2.26617	1.35155	6.45583	0.0110589	1.95629	0.951837	0.0214374		10	5	175.333	51	38.3333	0.666667	2	6		11	6	176.333	52	39.3333	1.66667	3	7
EAX90217	TVAG_415970	0.260748	-1.93927	1.87871	6.45809	0.0110448	1.95684	0.951837	0.0214374		27	162.667	111.667	51.3333	75.3333	1.33333	1.66667	10.6667		28	163.667	112.667	52.3333	76.3333	2.33333	2.66667	11.6667
EAY07119	TVAG_342830	0.440167	-1.18388	6.95225	6.46	0.011033	1.95731	0.951837	0.0214374		2631.67	2171.33	3831.67	2158	1358	457.667	1523	1409.67		2632.67	2172.33	3832.67	2159	1359	458.667	1524	1410.67
EAY03704		2.48756	1.31473	6.03851	6.46045	0.0110302	1.95742	0.951837	0.0214374		613.667	431.667	303.333	912.333	457	1006.67	2995.33	1171.33		614.667	432.667	304.333	913.333	458	1007.67	2996.33	1172.33
EAY18109		0.433081	-1.20729	8.19731	6.46157	0.0110232	1.95769	0.951837	0.0214374		5142	5028.33	10585.7	4636.33	4043.33	966.667	2660	3324.67		5143	5029.33	10586.7	4637.33	4044.33	967.667	2661	3325.67
EAX64881	TVAG_129810	0.341463	-1.5502	-2.43811	6.46234	0.0110185	1.95788	0.951837	0.0214374		4.33333	0.333333	0	5	0	0	0	0.666667		5.33333	1.33333	1	6	1	1	1	1.66667
EAY19873	TVAG_129800	6.75	2.75489	-1.2934	6.46342	0.0110117	1.95814	0.951837	0.0214374		0	0	0.333333	2.33333	37.3333	1.66667	0.666667	1.33333		1	1	1.33333	3.33333	38.3333	2.66667	1.66667	2.33333
EAX88931	TVAG_533980	4.675	2.22497	0.517824	6.44088	0.0111523	1.95264	0.954848	0.0200659		4.33333	2.66667	2.66667	26.3333	50.6667	3	96.3333	33		5.33333	3.66667	3.66667	27.3333	51.6667	4	97.3333	34
EAX73145	TVAG_521730	0.319343	-1.64682	2.31219	6.43068	0.0112166	1.95014	0.957655	0.0187911		146	69.3333	56	272.667	19.6667	11.6667	118.333	21.3333		147	70.3333	57	273.667	20.6667	12.6667	119.333	22.3333
EAY15354	TVAG_224300	3.53846	1.82312	-2.42681	6.43165	0.0112105	1.95038	0.957655	0.0187911		0	0	0	0.333333	0	0	1	10.3333		1	1	1	1.33333	1	1	2	11.3333
EAX94444	TVAG_031440	3.92857	1.974	-2.25438	6.42732	0.0112378	1.94932	0.958124	0.0185783		0.666667	0	0	0	4	0	10.3333	0		1.66667	1	1	1	5	1	11.3333	1
EAX90269	TVAG_099570	0.315217	-1.66558	0.37852	6.42323	0.0112637	1.94832	0.958988	0.0181866		21.3333	51.3333	23.3333	22.6667	6.33333	1.66667	13.3333	13.3333		22.3333	52.3333	24.3333	23.6667	7.33333	2.66667	14.3333	14.3333
EAY21538		2.92445	1.54817	2.11962	6.38391	0.011516	1.9387	0.965612	0.0151975		37	21.6667	32.3333	72.6667	103.333	20.6667	162.667	199.667		38	22.6667	33.3333	73.6667	104.333	21.6667	163.667	200.667
EAY13278		0.460864	-1.11759	8.8726	6.38505	0.0115086	1.93898	0.965612	0.0151975		13125.3	9970.67	10232	8173.33	5891.67	1594.33	6166.67	5471.67		13126.3	9971.67	10233	8174.33	5892.67	1595.33	6167.67	5472.67
EAX81170	TVAG_576970	0.316284	-1.66071	7.91362	6.38615	0.0115014	1.93925	0.965612	0.0151975		7888	8846.67	1227	6115	1203.33	986.333	1592	3830.67		7889	8847.67	1228	6116	1204.33	987.333	1593	3831.67
EAY14042		0.391413	-1.35324	2.94197	6.38818	0.0114883	1.93974	0.965612	0.0151975		52.3333	79	417.667	114.667	49.3333	14.3333	81.3333	112.333		53.3333	80	418.667	115.667	50.3333	15.3333	82.3333	113.333
EAY18085		2.98719	1.57879	4.23326	6.39041	0.0114739	1.94029	0.965612	0.0151975		66	72	195.333	365.333	707	111	691.333	585.667		67	73	196.333	366.333	708	112	692.333	586.667
EAX89790	TVAG_366940	2.69231	1.42884	-2.4698	6.39089	0.0114707	1.94041	0.965612	0.0151975		0	0	0	0.333333	0	2.66667	4.33333	0.666667		1	1	1	1.33333	1	3.66667	5.33333	1.66667
EAY15264	TVAG_394070	0.113821	-3.13516	-1.58901	6.39158	0.0114663	1.94058	0.965612	0.0151975		0	0.333333	0	36.6667	0	0	0.333333	0.333333		1	1.33333	1	37.6667	1	1	1.33333	1.33333
EAY18754	TVAG_267870	0.379133	-1.39922	10.4403	6.39465	0.0114465	1.94133	0.965612	0.0151975		11595.3	53508.3	33134	28894	10025.7	4757	8701	24713.7		11596.3	53509.3	33135	28895	10026.7	4758	8702	24714.7
EAY17491		2.47569	1.30783	4.01645	6.39651	0.0114345	1.94178	0.965612	0.0151975		142.333	152.333	65.6667	300.667	505.333	127	386.333	623.667		143.333	153.333	66.6667	301.667	506.333	128	387.333	624.667
EAY03239	TVAG_421260	0.180851	-2.46713	-1.50961	6.40533	0.0113778	1.94394	0.965612	0.0151975		7.66667	19.6667	0	0	0.333333	0	0.666667	0.666667		8.66667	20.6667	1	1	1.33333	1	1.66667	1.66667
EAY18100		0.291971	-1.7761	1.04602	6.40605	0.0113732	1.94412	0.965612	0.0151975		39	24.3333	95.3333	20	7.33333	6.33333	20.6667	15		40	25.3333	96.3333	21	8.33333	7.33333	21.6667	16
EAY12602	TVAG_074300	6.21429	2.63559	-1.88139	6.37887	0.0115487	1.93747	0.967023	0.0145632		0.666667	0	0	0	0	0	23.3333	1.66667		1.66667	1	1	1	1	1	24.3333	2.66667
EAY06068		2.89178	1.53196	2.07251	6.3706	0.0116026	1.93544	0.967546	0.0143284		36.6667	26.3333	14.3333	85	96	20.3333	161.667	199		37.6667	27.3333	15.3333	86	97	21.3333	162.667	200
EAX80925	TVAG_573290	4.30409	2.10571	2.07282	6.37153	0.0115965	1.93567	0.967546	0.0143284		26	67	5	12	152.333	26.6667	213.333	94.3333		27	68	6	13	153.333	27.6667	214.333	95.3333
EAY08440		4.28571	2.09954	-1.40167	6.37281	0.0115882	1.93598	0.967546	0.0143284		1	2	0	2.33333	7	1	11.3333	16.6667		2	3	1	3.33333	8	2	12.3333	17.6667
EAX89014	TVAG_499300	0.162393	-2.62244	-0.512998	6.36484	0.0116403	1.93403	0.969364	0.0135132		0.333333	6.33333	23.3333	44	3.33333	0.666667	0.666667	4		1.33333	7.33333	24.3333	45	4.33333	1.66667	1.66667	5
EAY17990		0.210117	-2.25074	-0.146687	6.36122	0.0116642	1.93315	0.970021	0.0132187		33.6667	5.33333	30	12.6667	3	2.66667	2	6.33333		34.6667	6.33333	31	13.6667	4	3.66667	3	7.33333
EAX89292	TVAG_482640	0.387097	-1.36923	-2.59009	6.34874	0.0117465	1.93009	0.97288	0.0119406		0	6.33333	0	0	0	0	0	0		1	7.33333	1	1	1	1	1	1
EAY11100	TVAG_358790	9.58095	3.26017	1.18741	6.34915	0.0117438	1.93019	0.97288	0.0119406		3.66667	9.33333	13.6667	4.33333	53.3333	2	274.333	1.66667		4.66667	10.3333	14.6667	5.33333	54.3333	3	275.333	2.66667
EAX94009		5.00526	2.32345	1.27507	6.34948	0.0117416	1.93027	0.97288	0.0119406		14	2.33333	11.6667	31.3333	21.3333	9.66667	252	30		15	3.33333	12.6667	32.3333	22.3333	10.6667	253	31
EAX71579	TVAG_552740	4.76923	2.25376	-2.14478	6.34483	0.0117724	1.92914	0.973699	0.0115751		0.333333	0	0	0	16.3333	0	0.333333	0		1.33333	1	1	1	17.3333	1	1.33333	1
EAX98575		0.320548	-1.64139	4.29334	6.34134	0.0117956	1.92828	0.974296	0.0113092		159.667	358.667	978.667	176.333	200	73.6667	137	123		160.667	359.667	979.667	177.333	201	74.6667	138	124
EAX87512	TVAG_085790	5.28571	2.4021	0.135527	6.33738	0.0118219	1.92731	0.97515	0.0109284		0.333333	0.666667	0.333333	15.6667	0.333333	20.3333	57.6667	28.6667		1.33333	1.66667	1.33333	16.6667	1.33333	21.3333	58.6667	29.6667
EAX90391	TVAG_084170	0.368421	-1.44057	-2.43601	6.32738	0.0118888	1.92486	0.975376	0.010828		5	0	2	1.66667	0	0	0.666667	0		6	1	3	2.66667	1	1	1.66667	1
EAX97287	TVAG_123370	0.139344	-2.84327	-1.18731	6.32777	0.0118862	1.92496	0.975376	0.010828		0	35.3333	1.33333	0	0.333333	0	1	0.333333		1	36.3333	2.33333	1	1.33333	1	2	1.33333
EAX93841		3.32558	1.73361	-0.649626	6.32817	0.0118835	1.92506	0.975376	0.010828		0.666667	0.666667	1	8	8.33333	17	10.6667	7.66667		1.66667	1.66667	2	9	9.33333	18	11.6667	8.66667
EAY02666	TVAG_253170	36.0769	5.173	1.58933	6.3335	0.0118479	1.92636	0.975376	0.010828		0.666667	0	8.33333	0	464.667	0	0.333333	0		1.66667	1	9.33333	1	465.667	1	1.33333	1
EAY21126	TVAG_282960	0.444911	-1.16841	7.73697	6.32366	0.0119138	1.92395	0.97611	0.0105011		4576	4250	5712.67	4208.67	2849.33	824.333	2347.67	2317.33		4577	4251	5713.67	4209.67	2850.33	825.333	2348.67	2318.33
EAY13219		3.08233	1.62402	2.18838	6.31193	0.0119928	1.92108	0.98127	0.00821166		29.6667	2.66667	19.3333	110.333	151	33.3333	201	122.333		30.6667	3.66667	20.3333	111.333	152	34.3333	202	123.333
EAX96294	TVAG_264180	0.142857	-2.80735	-0.971929	6.30425	0.0120449	1.9192	0.984202	0.00691568		42.6667	0	4	0.666667	1.33333	0	0.333333	1.66667		43.6667	1	5	1.66667	2.33333	1	1.33333	2.66667
EAY12837		4.57576	2.19401	0.269968	6.29252	0.0121249	1.91632	0.989414	0.00462211		1.33333	4.66667	4.66667	18.3333	28.3333	4	62.3333	52.3333		2.33333	5.66667	5.66667	19.3333	29.3333	5	63.3333	53.3333
EAY05356	TVAG_153900	4	2	-2.18956	6.28745	0.0121596	1.91508	0.990919	0.00396182		0.666667	0	0	0.333333	0.333333	0	3.66667	12		1.66667	1	1	1.33333	1.33333	1	4.66667	13
EAY02703	TVAG_440820	0.444481	-1.16981	9.23535	6.28445	0.0121802	1.91435	0.991266	0.00380967		12861.7	11157.3	19546.7	8331.33	7744.67	2039	7390	5891.33		12862.7	11158.3	19547.7	8332.33	7745.67	2040	7391	5892.33
EAY19554	TVAG_228160	0.449724	-1.15289	10.044	6.28059	0.0122067	1.9134	0.992101	0.003444		29283.3	37218.7	9496	22714	13294.7	2648	16641.7	11806.7		29284.3	37219.7	9497	22715	13295.7	2649	16642.7	11807.7
EAY12118	TVAG_301350	3.61538	1.85415	-2.41153	6.2691	0.0122862	1.91058	0.995899	0.00178449		0	0	0	0.333333	0	0	0.666667	11		1	1	1	1.33333	1	1	1.66667	12
EAY02171	TVAG_213710	0.149716	-2.7397	2.17383	6.27088	0.0122738	1.91102	0.995899	0.00178449		481	6	0.666667	36	21.3333	1	50	2.66667		482	7	1.66667	37	22.3333	2	51	3.66667
EAY20042		2.97807	1.57438	1.0794	6.24692	0.0124409	1.90515	0.997815	0.000949899		11.6667	10.3333	9	41	70.3333	15.6667	56.3333	80		12.6667	11.3333	10	42	71.3333	16.6667	57.3333	81
EAY15521		0.441633	-1.17908	7.72399	6.24709	0.0124398	1.90519	0.997815	0.000949899		4921.33	5595.33	4671.33	3280.33	2133.67	849	2392	2779.33		4922.33	5596.33	4672.33	3281.33	2134.67	850	2393	2780.33
EAX93718	TVAG_354570	7.35	2.87774	-1.30608	6.24709	0.0124398	1.90519	0.997815	0.000949899		0	0.666667	0.333333	1.66667	2.66667	0.333333	41.3333	0.666667		1	1.66667	1.33333	2.66667	3.66667	1.33333	42.3333	1.66667
EAY01831	TVAG_002860	3.23529	1.6939	-1.76174	6.24859	0.0124292	1.90556	0.997815	0.000949899		0	0	0	1.66667	1.33333	10	3	0		1	1	1	2.66667	2.33333	11	4	1
EAX91324	TVAG_492920	0.25	-2	-2.34555	6.251	0.0124123	1.90615	0.997815	0.000949899		0.333333	0	0	13	0.333333	0	0	0		1.33333	1	1	14	1.33333	1	1	1
EAY04960		0.396733	-1.33376	8.68751	6.2533	0.0123962	1.90671	0.997815	0.000949899		6930.33	10633	13772.7	3844	3613.67	1627.33	4809.33	3904.33		6931.33	10634	13773.7	3845	3614.67	1628.33	4810.33	3905.33
EAY12843		0.362751	-1.46295	5.2496	6.25854	0.0123596	1.90799	0.997815	0.000949899		192	561	2030.67	600.333	264	68.3333	121.333	771.333		193	562	2031.67	601.333	265	69.3333	122.333	772.333
EAX94019		5.30682	2.40785	0.44948	6.2627	0.0123306	1.90902	0.997815	0.000949899		3.33333	0.333333	4	17.6667	0.666667	16.3333	85.6667	49		4.33333	1.33333	5	18.6667	1.66667	17.3333	86.6667	50
EAX92162	TVAG_383350	0.45564	-1.13403	9.21135	6.241	0.0124826	1.9037	0.998524	0.000641571		17565.7	16139.7	10812.3	8529	5845.33	1671	11890	4761.67		17566.7	16140.7	10813.3	8530	5846.33	1672	11891	4762.67
EAX73678	TVAG_503490	4.15625	2.05528	-1.21038	6.24202	0.0124754	1.90395	0.998524	0.000641571		0.666667	0.333333	0	5.66667	8	3.66667	7	21.6667		1.66667	1.33333	1	6.66667	9	4.66667	8	22.6667
TVAG_314390	TVAG_314390	1	0	-3.13467	0	1	0	1	0		0	0	0	0	0	0	0	0		1	1	1	1	1	1	1	1
TVAG_504820	TVAG_504820	1	0	-3.13467	0	1	0	1	0		0	0	0	0	0	0	0	0		1	1	1	1	1	1	1	1
TVAG_505420	TVAG_505420	1	0	-3.13467	0	1	0	1	0		0	0	0	0	0	0	0	0		1	1	1	1	1	1	1	1
TVAG_508810	TVAG_508810	1	0	-3.13467	0	1	0	1	0		0	0	0	0	0	0	0	0		1	1	1	1	1	1	1	1
TVAG_514620	TVAG_514620	1	0	-3.13467	0	1	0	1	0		0	0	0	0	0	0	0	0		1	1	1	1	1	1	1	1
TVAG_515010	TVAG_515010	1	0	-3.13467	0	1	0	1	0		0	0	0	0	0	0	0	0		1	1	1	1	1	1	1	1
TVAG_516280	TVAG_516280	1	0	-3.13467	0	1	0	1	0		0	0	0	0	0	0	0	0		1	1	1	1	1	1	1	1
TVAG_531370	TVAG_531370	1	0	-3.13467	0	1	0	1	0		0	0	0	0	0	0	0	0		1	1	1	1	1	1	1	1
TVAG_532100	TVAG_532100	1	0	-3.13467	0	1	0	1	0		0	0	0	0	0	0	0	0		1	1	1	1	1	1	1	1
TVAG_532190	TVAG_532190	1	0	-3.13467	0	1	0	1	0		0	0	0	0	0	0	0	0		1	1	1	1	1	1	1	1
TVAG_537080	TVAG_537080	1	0	-3.13467	0	1	0	1	0		0	0	0	0	0	0	0	0		1	1	1	1	1	1	1	1
TVAG_541000	TVAG_541000	1	0	-3.13467	0	1	0	1	0		0	0	0	0	0	0	0	0		1	1	1	1	1	1	1	1
TVAG_542750	TVAG_542750	1	0	-3.13467	0	1	0	1	0		0	0	0	0	0	0	0	0		1	1	1	1	1	1	1	1
TVAG_543810	TVAG_543810	1	0	-3.13467	0	1	0	1	0		0	0	0	0	0	0	0	0		1	1	1	1	1	1	1	1
TVAG_561840	TVAG_561840	1	0	-3.13467	0	1	0	1	0		0	0	0	0	0	0	0	0		1	1	1	1	1	1	1	1
TVAG_563010	TVAG_563010	1	0	-3.13467	0	1	0	1	0		0	0	0	0	0	0	0	0		1	1	1	1	1	1	1	1
TVAG_564170	TVAG_564170	1	0	-3.13467	0	1	0	1	0		0	0	0	0	0	0	0	0		1	1	1	1	1	1	1	1
TVAG_567210	TVAG_567210	1	0	-3.13467	0	1	0	1	0		0	0	0	0	0	0	0	0		1	1	1	1	1	1	1	1
TVAG_570220	TVAG_570220	1	0	-3.13467	0	1	0	1	0		0	0	0	0	0	0	0	0		1	1	1	1	1	1	1	1
TVAG_570880	TVAG_570880	1	0	-3.13467	0	1	0	1	0		0	0	0	0	0	0	0	0		1	1	1	1	1	1	1	1
TVAG_571480	TVAG_571480	1	0	-3.13467	0	1	0	1	0		0	0	0	0	0	0	0	0		1	1	1	1	1	1	1	1
TVAG_583300	TVAG_583300	1	0	-3.13467	0	1	0	1	0		0	0	0	0	0	0	0	0		1	1	1	1	1	1	1	1
TVAG_589200	TVAG_589200	1	0	-3.13467	0	1	0	1	0		0	0	0	0	0	0	0	0		1	1	1	1	1	1	1	1
TVAG_592560	TVAG_592560	1	0	-3.13467	0	1	0	1	0		0	0	0	0	0	0	0	0		1	1	1	1	1	1	1	1
TVAG_600980	TVAG_600980	1	0	-3.13467	0	1	0	1	0		0	0	0	0	0	0	0	0		1	1	1	1	1	1	1	1
TVAG_602530	TVAG_602530	1	0	-3.13467	0	1	0	1	0		0	0	0	0	0	0	0	0		1	1	1	1	1	1	1	1
TVAG_604620	TVAG_604620	1	0	-3.13467	0	1	0	1	0		0	0	0	0	0	0	0	0		1	1	1	1	1	1	1	1
TVAG_606310	TVAG_606310	1	0	-3.13467	0	1	0	1	0		0	0	0	0	0	0	0	0		1	1	1	1	1	1	1	1
TVAG_606810	TVAG_606810	1	0	-3.13467	0	1	0	1	0		0	0	0	0	0	0	0	0		1	1	1	1	1	1	1	1
EAX69300	TVAG_534330	1	0	-3.13467	0	1	0	1	0		0	0	0	0	0	0	0	0		1	1	1	1	1	1	1	1
EAX67016	TVAG_543280	1	0	-3.13467	0	1	0	1	0		0	0	0	0	0	0	0	0		1	1	1	1	1	1	1	1
TVAG_280340	TVAG_280340	1	0	-3.13467	0	1	0	1	0		0	0	0	0	0	0	0	0		1	1	1	1	1	1	1	1
TVAG_510060	TVAG_510060	1	0	-3.13467	0	1	0	1	0		0	0	0	0	0	0	0	0		1	1	1	1	1	1	1	1
TVAG_518130	TVAG_518130	1	0	-3.13467	0	1	0	1	0		0	0	0	0	0	0	0	0		1	1	1	1	1	1	1	1
TVAG_538990	TVAG_538990	1	0	-3.13467	0	1	0	1	0		0	0	0	0	0	0	0	0		1	1	1	1	1	1	1	1
TVAG_550240	TVAG_550240	1	0	-3.13467	0	1	0	1	0		0	0	0	0	0	0	0	0		1	1	1	1	1	1	1	1
TVAG_560050	TVAG_560050	1	0	-3.13467	0	1	0	1	0		0	0	0	0	0	0	0	0		1	1	1	1	1	1	1	1
TVAG_599390	TVAG_599390	1	0	-3.13467	0	1	0	1	0		0	0	0	0	0	0	0	0		1	1	1	1	1	1	1	1
TVAG_602000	TVAG_602000	1	0	-3.13467	0	1	0	1	0		0	0	0	0	0	0	0	0		1	1	1	1	1	1	1	1
TVAG_603840	TVAG_603840	1	0	-3.13467	0	1	0	1	0		0	0	0	0	0	0	0	0		1	1	1	1	1	1	1	1
TVAG_142990	TVAG_142990	1	0	-3.13467	0	1	0	1	0		0	0	0	0	0	0	0	0		1	1	1	1	1	1	1	1
TVAG_212930	TVAG_212930	1	0	-3.13467	0	1	0	1	0		0	0	0	0	0	0	0	0		1	1	1	1	1	1	1	1
TVAG_230460	TVAG_230460	1	0	-3.13467	0	1	0	1	0		0	0	0	0	0	0	0	0		1	1	1	1	1	1	1	1
TVAG_284800	TVAG_284800	1	0	-3.13467	0	1	0	1	0		0	0	0	0	0	0	0	0		1	1	1	1	1	1	1	1
TVAG_297810	TVAG_297810	1	0	-3.13467	0	1	0	1	0		0	0	0	0	0	0	0	0		1	1	1	1	1	1	1	1
TVAG_310820	TVAG_310820	1	0	-3.13467	0	1	0	1	0		0	0	0	0	0	0	0	0		1	1	1	1	1	1	1	1
TVAG_335180	TVAG_335180	1	0	-3.13467	0	1	0	1	0		0	0	0	0	0	0	0	0		1	1	1	1	1	1	1	1
TVAG_367740	TVAG_367740	1	0	-3.13467	0	1	0	1	0		0	0	0	0	0	0	0	0		1	1	1	1	1	1	1	1
TVAG_383090	TVAG_383090	1	0	-3.13467	0	1	0	1	0		0	0	0	0	0	0	0	0		1	1	1	1	1	1	1	1
TVAG_396370	TVAG_396370	1	0	-3.13467	0	1	0	1	0		0	0	0	0	0	0	0	0		1	1	1	1	1	1	1	1
TVAG_405590	TVAG_405590	1	0	-3.13467	0	1	0	1	0		0	0	0	0	0	0	0	0		1	1	1	1	1	1	1	1
TVAG_462100	TVAG_462100	1	0	-3.13467	0	1	0	1	0		0	0	0	0	0	0	0	0		1	1	1	1	1	1	1	1
TVAG_500200	TVAG_500200	1	0	-3.13467	0	1	0	1	0		0	0	0	0	0	0	0	0		1	1	1	1	1	1	1	1
TVAG_501870	TVAG_501870	1	0	-3.13467	0	1	0	1	0		0	0	0	0	0	0	0	0		1	1	1	1	1	1	1	1
TVAG_504830	TVAG_504830	1	0	-3.13467	0	1	0	1	0		0	0	0	0	0	0	0	0		1	1	1	1	1	1	1	1
TVAG_508820	TVAG_508820	1	0	-3.13467	0	1	0	1	0		0	0	0	0	0	0	0	0		1	1	1	1	1	1	1	1
TVAG_509420	TVAG_509420	1	0	-3.13467	0	1	0	1	0		0	0	0	0	0	0	0	0		1	1	1	1	1	1	1	1
TVAG_514510	TVAG_514510	1	0	-3.13467	0	1	0	1	0		0	0	0	0	0	0	0	0		1	1	1	1	1	1	1	1
TVAG_514680	TVAG_514680	1	0	-3.13467	0	1	0	1	0		0	0	0	0	0	0	0	0		1	1	1	1	1	1	1	1
TVAG_515000	TVAG_515000	1	0	-3.13467	0	1	0	1	0		0	0	0	0	0	0	0	0		1	1	1	1	1	1	1	1
TVAG_515320	TVAG_515320	1	0	-3.13467	0	1	0	1	0		0	0	0	0	0	0	0	0		1	1	1	1	1	1	1	1
TVAG_518030	TVAG_518030	1	0	-3.13467	0	1	0	1	0		0	0	0	0	0	0	0	0		1	1	1	1	1	1	1	1
TVAG_518700	TVAG_518700	1	0	-3.13467	0	1	0	1	0		0	0	0	0	0	0	0	0		1	1	1	1	1	1	1	1
TVAG_519580	TVAG_519580	1	0	-3.13467	0	1	0	1	0		0	0	0	0	0	0	0	0		1	1	1	1	1	1	1	1
TVAG_527070	TVAG_527070	1	0	-3.13467	0	1	0	1	0		0	0	0	0	0	0	0	0		1	1	1	1	1	1	1	1
TVAG_527870	TVAG_527870	1	0	-3.13467	0	1	0	1	0		0	0	0	0	0	0	0	0		1	1	1	1	1	1	1	1
TVAG_529070	TVAG_529070	1	0	-3.13467	0	1	0	1	0		0	0	0	0	0	0	0	0		1	1	1	1	1	1	1	1
TVAG_534490	TVAG_534490	1	0	-3.13467	0	1	0	1	0		0	0	0	0	0	0	0	0		1	1	1	1	1	1	1	1
TVAG_535960	TVAG_535960	1	0	-3.13467	0	1	0	1	0		0	0	0	0	0	0	0	0		1	1	1	1	1	1	1	1
TVAG_537070	TVAG_537070	1	0	-3.13467	0	1	0	1	0		0	0	0	0	0	0	0	0		1	1	1	1	1	1	1	1
TVAG_537500	TVAG_537500	1	0	-3.13467	0	1	0	1	0		0	0	0	0	0	0	0	0		1	1	1	1	1	1	1	1
TVAG_538900	TVAG_538900	1	0	-3.13467	0	1	0	1	0		0	0	0	0	0	0	0	0		1	1	1	1	1	1	1	1
TVAG_539380	TVAG_539380	1	0	-3.13467	0	1	0	1	0		0	0	0	0	0	0	0	0		1	1	1	1	1	1	1	1
TVAG_542840	TVAG_542840	1	0	-3.13467	0	1	0	1	0		0	0	0	0	0	0	0	0		1	1	1	1	1	1	1	1
TVAG_543650	TVAG_543650	1	0	-3.13467	0	1	0	1	0		0	0	0	0	0	0	0	0		1	1	1	1	1	1	1	1
TVAG_544800	TVAG_544800	1	0	-3.13467	0	1	0	1	0		0	0	0	0	0	0	0	0		1	1	1	1	1	1	1	1
TVAG_544840	TVAG_544840	1	0	-3.13467	0	1	0	1	0		0	0	0	0	0	0	0	0		1	1	1	1	1	1	1	1
TVAG_547310	TVAG_547310	1	0	-3.13467	0	1	0	1	0		0	0	0	0	0	0	0	0		1	1	1	1	1	1	1	1
TVAG_550110	TVAG_550110	1	0	-3.13467	0	1	0	1	0		0	0	0	0	0	0	0	0		1	1	1	1	1	1	1	1
TVAG_550890	TVAG_550890	1	0	-3.13467	0	1	0	1	0		0	0	0	0	0	0	0	0		1	1	1	1	1	1	1	1
TVAG_551130	TVAG_551130	1	0	-3.13467	0	1	0	1	0		0	0	0	0	0	0	0	0		1	1	1	1	1	1	1	1
TVAG_552890	TVAG_552890	1	0	-3.13467	0	1	0	1	0		0	0	0	0	0	0	0	0		1	1	1	1	1	1	1	1
TVAG_553330	TVAG_553330	1	0	-3.13467	0	1	0	1	0		0	0	0	0	0	0	0	0		1	1	1	1	1	1	1	1
TVAG_554170	TVAG_554170	1	0	-3.13467	0	1	0	1	0		0	0	0	0	0	0	0	0		1	1	1	1	1	1	1	1
TVAG_555040	TVAG_555040	1	0	-3.13467	0	1	0	1	0		0	0	0	0	0	0	0	0		1	1	1	1	1	1	1	1
TVAG_555450	TVAG_555450	1	0	-3.13467	0	1	0	1	0		0	0	0	0	0	0	0	0		1	1	1	1	1	1	1	1
TVAG_555480	TVAG_555480	1	0	-3.13467	0	1	0	1	0		0	0	0	0	0	0	0	0		1	1	1	1	1	1	1	1
TVAG_560090	TVAG_560090	1	0	-3.13467	0	1	0	1	0		0	0	0	0	0	0	0	0		1	1	1	1	1	1	1	1
TVAG_561370	TVAG_561370	1	0	-3.13467	0	1	0	1	0		0	0	0	0	0	0	0	0		1	1	1	1	1	1	1	1
TVAG_563000	TVAG_563000	1	0	-3.13467	0	1	0	1	0		0	0	0	0	0	0	0	0		1	1	1	1	1	1	1	1
TVAG_564160	TVAG_564160	1	0	-3.13467	0	1	0	1	0		0	0	0	0	0	0	0	0		1	1	1	1	1	1	1	1
TVAG_564530	TVAG_564530	1	0	-3.13467	0	1	0	1	0		0	0	0	0	0	0	0	0		1	1	1	1	1	1	1	1
TVAG_569050	TVAG_569050	1	0	-3.13467	0	1	0	1	0		0	0	0	0	0	0	0	0		1	1	1	1	1	1	1	1
TVAG_570870	TVAG_570870	1	0	-3.13467	0	1	0	1	0		0	0	0	0	0	0	0	0		1	1	1	1	1	1	1	1
TVAG_571670	TVAG_571670	1	0	-3.13467	0	1	0	1	0		0	0	0	0	0	0	0	0		1	1	1	1	1	1	1	1
TVAG_573660	TVAG_573660	1	0	-3.13467	0	1	0	1	0		0	0	0	0	0	0	0	0		1	1	1	1	1	1	1	1
TVAG_573680	TVAG_573680	1	0	-3.13467	0	1	0	1	0		0	0	0	0	0	0	0	0		1	1	1	1	1	1	1	1
TVAG_578040	TVAG_578040	1	0	-3.13467	0	1	0	1	0		0	0	0	0	0	0	0	0		1	1	1	1	1	1	1	1
TVAG_578300	TVAG_578300	1	0	-3.13467	0	1	0	1	0		0	0	0	0	0	0	0	0		1	1	1	1	1	1	1	1
TVAG_578560	TVAG_578560	1	0	-3.13467	0	1	0	1	0		0	0	0	0	0	0	0	0		1	1	1	1	1	1	1	1
TVAG_578590	TVAG_578590	1	0	-3.13467	0	1	0	1	0		0	0	0	0	0	0	0	0		1	1	1	1	1	1	1	1
TVAG_578870	TVAG_578870	1	0	-3.13467	0	1	0	1	0		0	0	0	0	0	0	0	0		1	1	1	1	1	1	1	1
TVAG_581110	TVAG_581110	1	0	-3.13467	0	1	0	1	0		0	0	0	0	0	0	0	0		1	1	1	1	1	1	1	1
TVAG_581990	TVAG_581990	1	0	-3.13467	0	1	0	1	0		0	0	0	0	0	0	0	0		1	1	1	1	1	1	1	1
TVAG_582540	TVAG_582540	1	0	-3.13467	0	1	0	1	0		0	0	0	0	0	0	0	0		1	1	1	1	1	1	1	1
TVAG_582730	TVAG_582730	1	0	-3.13467	0	1	0	1	0		0	0	0	0	0	0	0	0		1	1	1	1	1	1	1	1
TVAG_582860	TVAG_582860	1	0	-3.13467	0	1	0	1	0		0	0	0	0	0	0	0	0		1	1	1	1	1	1	1	1
TVAG_584030	TVAG_584030	1	0	-3.13467	0	1	0	1	0		0	0	0	0	0	0	0	0		1	1	1	1	1	1	1	1
TVAG_585080	TVAG_585080	1	0	-3.13467	0	1	0	1	0		0	0	0	0	0	0	0	0		1	1	1	1	1	1	1	1
TVAG_585290	TVAG_585290	1	0	-3.13467	0	1	0	1	0		0	0	0	0	0	0	0	0		1	1	1	1	1	1	1	1
TVAG_585600	TVAG_585600	1	0	-3.13467	0	1	0	1	0		0	0	0	0	0	0	0	0		1	1	1	1	1	1	1	1
TVAG_586530	TVAG_586530	1	0	-3.13467	0	1	0	1	0		0	0	0	0	0	0	0	0		1	1	1	1	1	1	1	1
TVAG_587990	TVAG_587990	1	0	-3.13467	0	1	0	1	0		0	0	0	0	0	0	0	0		1	1	1	1	1	1	1	1
TVAG_588930	TVAG_588930	1	0	-3.13467	0	1	0	1	0		0	0	0	0	0	0	0	0		1	1	1	1	1	1	1	1
TVAG_589780	TVAG_589780	1	0	-3.13467	0	1	0	1	0		0	0	0	0	0	0	0	0		1	1	1	1	1	1	1	1
TVAG_589800	TVAG_589800	1	0	-3.13467	0	1	0	1	0		0	0	0	0	0	0	0	0		1	1	1	1	1	1	1	1
TVAG_592060	TVAG_592060	1	0	-3.13467	0	1	0	1	0		0	0	0	0	0	0	0	0		1	1	1	1	1	1	1	1
TVAG_592270	TVAG_592270	1	0	-3.13467	0	1	0	1	0		0	0	0	0	0	0	0	0		1	1	1	1	1	1	1	1
TVAG_597340	TVAG_597340	1	0	-3.13467	0	1	0	1	0		0	0	0	0	0	0	0	0		1	1	1	1	1	1	1	1
TVAG_600910	TVAG_600910	1	0	-3.13467	0	1	0	1	0		0	0	0	0	0	0	0	0		1	1	1	1	1	1	1	1
TVAG_602540	TVAG_602540	1	0	-3.13467	0	1	0	1	0		0	0	0	0	0	0	0	0		1	1	1	1	1	1	1	1
TVAG_602620	TVAG_602620	1	0	-3.13467	0	1	0	1	0		0	0	0	0	0	0	0	0		1	1	1	1	1	1	1	1
TVAG_603450	TVAG_603450	1	0	-3.13467	0	1	0	1	0		0	0	0	0	0	0	0	0		1	1	1	1	1	1	1	1
TVAG_603800	TVAG_603800	1	0	-3.13467	0	1	0	1	0		0	0	0	0	0	0	0	0		1	1	1	1	1	1	1	1
TVAG_605840	TVAG_605840	1	0	-3.13467	0	1	0	1	0		0	0	0	0	0	0	0	0		1	1	1	1	1	1	1	1
TVAG_606250	TVAG_606250	1	0	-3.13467	0	1	0	1	0		0	0	0	0	0	0	0	0		1	1	1	1	1	1	1	1
EAX71899	TVAG_552720	1	0	-3.13467	0	1	0	1	0		0	0	0	0	0	0	0	0		1	1	1	1	1	1	1	1
EAX77366	TVAG_368030	1	0	-3.13467	0	1	0	1	0		0	0	0	0	0	0	0	0		1	1	1	1	1	1	1	1
EAX66482	TVAG_097360	1	0	-3.13467	0	1	0	1	0		0	0	0	0	0	0	0	0		1	1	1	1	1	1	1	1
EAX89258	TVAG_409390	1	0	-3.13467	0	1	0	1	0		0	0	0	0	0	0	0	0		1	1	1	1	1	1	1	1
EAX84603	TVAG_234030	1	0	-3.13467	0	1	0	1	0		0	0	0	0	0	0	0	0		1	1	1	1	1	1	1	1
EAX67469	TVAG_520170	1	0	-3.13467	0	1	0	1	0		0	0	0	0	0	0	0	0		1	1	1	1	1	1	1	1
EAX67823	TVAG_523140	1	0	-3.13467	0	1	0	1	0		0	0	0	0	0	0	0	0		1	1	1	1	1	1	1	1
EAX69544	TVAG_566320	1	0	-3.13467	0	1	0	1	0		0	0	0	0	0	0	0	0		1	1	1	1	1	1	1	1
EAX68957	TVAG_590030	1	0	-3.13467	0	1	0	1	0		0	0	0	0	0	0	0	0		1	1	1	1	1	1	1	1
EAX69562	TVAG_069220	1	0	-3.13467	0	1	0	1	0		0	0	0	0	0	0	0	0		1	1	1	1	1	1	1	1
EAX85678	TVAG_111640	1	0	-3.13467	0	1	0	1	0		0	0	0	0	0	0	0	0		1	1	1	1	1	1	1	1
EAX83008	TVAG_269720	1	0	-3.13467	0	1	0	1	0		0	0	0	0	0	0	0	0		1	1	1	1	1	1	1	1
EAX85028	TVAG_320790	1	0	-3.13467	0	1	0	1	0		0	0	0	0	0	0	0	0		1	1	1	1	1	1	1	1
EAX89892	TVAG_366950	1	0	-3.13467	0	1	0	1	0		0	0	0	0	0	0	0	0		1	1	1	1	1	1	1	1
EAX78474	TVAG_415910	1	0	-3.13467	0	1	0	1	0		0	0	0	0	0	0	0	0		1	1	1	1	1	1	1	1
EAX65979	TVAG_485350	1	0	-3.13467	0	1	0	1	0		0	0	0	0	0	0	0	0		1	1	1	1	1	1	1	1
EAX70303	TVAG_493300	1	0	-3.13467	0	1	0	1	0		0	0	0	0	0	0	0	0		1	1	1	1	1	1	1	1
EAX89128	TVAG_499280	1	0	-3.13467	0	1	0	1	0		0	0	0	0	0	0	0	0		1	1	1	1	1	1	1	1
EAX66778	TVAG_508870	1	0	-3.13467	0	1	0	1	0		0	0	0	0	0	0	0	0		1	1	1	1	1	1	1	1
EAX75983	TVAG_517930	1	0	-3.13467	0	1	0	1	0		0	0	0	0	0	0	0	0		1	1	1	1	1	1	1	1
EAX72628	TVAG_521820	1	0	-3.13467	0	1	0	1	0		0	0	0	0	0	0	0	0		1	1	1	1	1	1	1	1
EAX71505	TVAG_522920	1	0	-3.13467	0	1	0	1	0		0	0	0	0	0	0	0	0		1	1	1	1	1	1	1	1
EAX68297	TVAG_523690	1	0	-3.13467	0	1	0	1	0		0	0	0	0	0	0	0	0		1	1	1	1	1	1	1	1
EAX69292	TVAG_526950	1	0	-3.13467	0	1	0	1	0		0	0	0	0	0	0	0	0		1	1	1	1	1	1	1	1
EAX74181	TVAG_567340	1	0	-3.13467	0	1	0	1	0		0	0	0	0	0	0	0	0		1	1	1	1	1	1	1	1
EAX65964	TVAG_574270	1	0	-3.13467	0	1	0	1	0		0	0	0	0	0	0	0	0		1	1	1	1	1	1	1	1
EAX69092	TVAG_606140	1	0	-3.13467	0	1	0	1	0		0	0	0	0	0	0	0	0		1	1	1	1	1	1	1	1
EAX64259	TVAG_607480	1	0	-3.13467	0	1	0	1	0		0	0	0	0	0	0	0	0		1	1	1	1	1	1	1	1
EAX72185	TVAG_550850	1	0	-3.13467	0	1	0	1	0		0	0	0	0	0	0	0	0		1	1	1	1	1	1	1	1
EAX67833	TVAG_506200	1	0	-3.13467	0	1	0	1	0		0	0	0	0	0	0	0	0		1	1	1	1	1	1	1	1
EAX76596	TVAG_243530	1	0	-3.13467	0	1	0	1	0		0	0	0	0	0	0	0	0		1	1	1	1	1	1	1	1
EAX75125	TVAG_456130	1	0	-3.13467	0	1	0	1	0		0	0	0	0	0	0	0	0		1	1	1	1	1	1	1	1
EAX68694	TVAG_527850	1	0	-3.13467	0	1	0	1	0		0	0	0	0	0	0	0	0		1	1	1	1	1	1	1	1
EAX72431	TVAG_560380	1	0	-3.13467	0	1	0	1	0		0	0	0	0	0	0	0	0		1	1	1	1	1	1	1	1
EAX89849	TVAG_094940	1	0	-3.13467	0	1	0	1	0		0	0	0	0	0	0	0	0		1	1	1	1	1	1	1	1
EAX89850	TVAG_094950	1	0	-3.13467	0	1	0	1	0		0	0	0	0	0	0	0	0		1	1	1	1	1	1	1	1
EAX89860	TVAG_094980	1	0	-3.13467	0	1	0	1	0		0	0	0	0	0	0	0	0		1	1	1	1	1	1	1	1
EAX73652	TVAG_315490	1	0	-3.13467	0	1	0	1	0		0	0	0	0	0	0	0	0		1	1	1	1	1	1	1	1
EAX78377	TVAG_577470	1	0	-3.13467	0	1	0	1	0		0	0	0	0	0	0	0	0		1	1	1	1	1	1	1	1
EAX78501	TVAG_579370	1	0	-3.13467	0	1	0	1	0		0	0	0	0	0	0	0	0		1	1	1	1	1	1	1	1
EAX87022	TVAG_110920	1	0	-3.13467	0	1	0	1	0		0	0	0	0	0	0	0	0		1	1	1	1	1	1	1	1
EAX78824	TVAG_000990	1	0	-3.13467	0	1	0	1	0		0	0	0	0	0	0	0	0		1	1	1	1	1	1	1	1
EAX75863	TVAG_002100	1	0	-3.13467	0	1	0	1	0		0	0	0	0	0	0	0	0		1	1	1	1	1	1	1	1
EAX81727	TVAG_002570	1	0	-3.13467	0	1	0	1	0		0	0	0	0	0	0	0	0		1	1	1	1	1	1	1	1
EAX87937	TVAG_002730	1	0	-3.13467	0	1	0	1	0		0	0	0	0	0	0	0	0		1	1	1	1	1	1	1	1
EAX84829	TVAG_004280	1	0	-3.13467	0	1	0	1	0		0	0	0	0	0	0	0	0		1	1	1	1	1	1	1	1
EAX75506	TVAG_010400	1	0	-3.13467	0	1	0	1	0		0	0	0	0	0	0	0	0		1	1	1	1	1	1	1	1
EAX75508	TVAG_010420	1	0	-3.13467	0	1	0	1	0		0	0	0	0	0	0	0	0		1	1	1	1	1	1	1	1
EAX79159	TVAG_011950	1	0	-3.13467	0	1	0	1	0		0	0	0	0	0	0	0	0		1	1	1	1	1	1	1	1
EAX77779	TVAG_012180	1	0	-3.13467	0	1	0	1	0		0	0	0	0	0	0	0	0		1	1	1	1	1	1	1	1
EAX81378	TVAG_014610	1	0	-3.13467	0	1	0	1	0		0	0	0	0	0	0	0	0		1	1	1	1	1	1	1	1
EAX70221	TVAG_015680	1	0	-3.13467	0	1	0	1	0		0	0	0	0	0	0	0	0		1	1	1	1	1	1	1	1
EAX74330	TVAG_015700	1	0	-3.13467	0	1	0	1	0		0	0	0	0	0	0	0	0		1	1	1	1	1	1	1	1
EAX80402	TVAG_017220	1	0	-3.13467	0	1	0	1	0		0	0	0	0	0	0	0	0		1	1	1	1	1	1	1	1
EAX81656	TVAG_018840	1	0	-3.13467	0	1	0	1	0		0	0	0	0	0	0	0	0		1	1	1	1	1	1	1	1
EAX82989	TVAG_019910	1	0	-3.13467	0	1	0	1	0		0	0	0	0	0	0	0	0		1	1	1	1	1	1	1	1
EAX79579	TVAG_022820	1	0	-3.13467	0	1	0	1	0		0	0	0	0	0	0	0	0		1	1	1	1	1	1	1	1
EAX79582	TVAG_022840	1	0	-3.13467	0	1	0	1	0		0	0	0	0	0	0	0	0		1	1	1	1	1	1	1	1
EAX75360	TVAG_023640	1	0	-3.13467	0	1	0	1	0		0	0	0	0	0	0	0	0		1	1	1	1	1	1	1	1
EAX68604	TVAG_023680	1	0	-3.13467	0	1	0	1	0		0	0	0	0	0	0	0	0		1	1	1	1	1	1	1	1
EAX79930	TVAG_024410	1	0	-3.13467	0	1	0	1	0		0	0	0	0	0	0	0	0		1	1	1	1	1	1	1	1
EAX80175	TVAG_024490	1	0	-3.13467	0	1	0	1	0		0	0	0	0	0	0	0	0		1	1	1	1	1	1	1	1
EAX86304	TVAG_025250	1	0	-3.13467	0	1	0	1	0		0	0	0	0	0	0	0	0		1	1	1	1	1	1	1	1
EAX80138	TVAG_026880	1	0	-3.13467	0	1	0	1	0		0	0	0	0	0	0	0	0		1	1	1	1	1	1	1	1
EAX84956	TVAG_026920	1	0	-3.13467	0	1	0	1	0		0	0	0	0	0	0	0	0		1	1	1	1	1	1	1	1
EAX82643	TVAG_026990	1	0	-3.13467	0	1	0	1	0		0	0	0	0	0	0	0	0		1	1	1	1	1	1	1	1
EAX81031	TVAG_029900	1	0	-3.13467	0	1	0	1	0		0	0	0	0	0	0	0	0		1	1	1	1	1	1	1	1
EAX72219	TVAG_029940	1	0	-3.13467	0	1	0	1	0		0	0	0	0	0	0	0	0		1	1	1	1	1	1	1	1
EAX76944	TVAG_030040	1	0	-3.13467	0	1	0	1	0		0	0	0	0	0	0	0	0		1	1	1	1	1	1	1	1
EAX78483	TVAG_032020	1	0	-3.13467	0	1	0	1	0		0	0	0	0	0	0	0	0		1	1	1	1	1	1	1	1
EAX73705	TVAG_032410	1	0	-3.13467	0	1	0	1	0		0	0	0	0	0	0	0	0		1	1	1	1	1	1	1	1
EAX82449	TVAG_034510	1	0	-3.13467	0	1	0	1	0		0	0	0	0	0	0	0	0		1	1	1	1	1	1	1	1
EAX74512	TVAG_036540	1	0	-3.13467	0	1	0	1	0		0	0	0	0	0	0	0	0		1	1	1	1	1	1	1	1
EAX69193	TVAG_037170	1	0	-3.13467	0	1	0	1	0		0	0	0	0	0	0	0	0		1	1	1	1	1	1	1	1
EAX82817	TVAG_037270	1	0	-3.13467	0	1	0	1	0		0	0	0	0	0	0	0	0		1	1	1	1	1	1	1	1
EAX83570	TVAG_037850	1	0	-3.13467	0	1	0	1	0		0	0	0	0	0	0	0	0		1	1	1	1	1	1	1	1
EAX78624	TVAG_039580	1	0	-3.13467	0	1	0	1	0		0	0	0	0	0	0	0	0		1	1	1	1	1	1	1	1
EAX81445	TVAG_042500	1	0	-3.13467	0	1	0	1	0		0	0	0	0	0	0	0	0		1	1	1	1	1	1	1	1
EAX85103	TVAG_047370	1	0	-3.13467	0	1	0	1	0		0	0	0	0	0	0	0	0		1	1	1	1	1	1	1	1
EAX89158	TVAG_049480	1	0	-3.13467	0	1	0	1	0		0	0	0	0	0	0	0	0		1	1	1	1	1	1	1	1
EAX88517	TVAG_050620	1	0	-3.13467	0	1	0	1	0		0	0	0	0	0	0	0	0		1	1	1	1	1	1	1	1
EAX70715	TVAG_051800	1	0	-3.13467	0	1	0	1	0		0	0	0	0	0	0	0	0		1	1	1	1	1	1	1	1
EAX89066	TVAG_054060	1	0	-3.13467	0	1	0	1	0		0	0	0	0	0	0	0	0		1	1	1	1	1	1	1	1
EAX83580	TVAG_055420	1	0	-3.13467	0	1	0	1	0		0	0	0	0	0	0	0	0		1	1	1	1	1	1	1	1
EAX86243	TVAG_057550	1	0	-3.13467	0	1	0	1	0		0	0	0	0	0	0	0	0		1	1	1	1	1	1	1	1
EAX82684	TVAG_057650	1	0	-3.13467	0	1	0	1	0		0	0	0	0	0	0	0	0		1	1	1	1	1	1	1	1
EAX82687	TVAG_057670	1	0	-3.13467	0	1	0	1	0		0	0	0	0	0	0	0	0		1	1	1	1	1	1	1	1
EAX85765	TVAG_057710	1	0	-3.13467	0	1	0	1	0		0	0	0	0	0	0	0	0		1	1	1	1	1	1	1	1
EAX85770	TVAG_057730	1	0	-3.13467	0	1	0	1	0		0	0	0	0	0	0	0	0		1	1	1	1	1	1	1	1
EAX80263	TVAG_060640	1	0	-3.13467	0	1	0	1	0		0	0	0	0	0	0	0	0		1	1	1	1	1	1	1	1
EAX83069	TVAG_060780	1	0	-3.13467	0	1	0	1	0		0	0	0	0	0	0	0	0		1	1	1	1	1	1	1	1
EAX81578	TVAG_060900	1	0	-3.13467	0	1	0	1	0		0	0	0	0	0	0	0	0		1	1	1	1	1	1	1	1
EAX87388	TVAG_061130	1	0	-3.13467	0	1	0	1	0		0	0	0	0	0	0	0	0		1	1	1	1	1	1	1	1
EAX79916	TVAG_065430	1	0	-3.13467	0	1	0	1	0		0	0	0	0	0	0	0	0		1	1	1	1	1	1	1	1
EAX82033	TVAG_068590	1	0	-3.13467	0	1	0	1	0		0	0	0	0	0	0	0	0		1	1	1	1	1	1	1	1
EAX82581	TVAG_069120	1	0	-3.13467	0	1	0	1	0		0	0	0	0	0	0	0	0		1	1	1	1	1	1	1	1
EAX82582	TVAG_069130	1	0	-3.13467	0	1	0	1	0		0	0	0	0	0	0	0	0		1	1	1	1	1	1	1	1
EAX85302	TVAG_069170	1	0	-3.13467	0	1	0	1	0		0	0	0	0	0	0	0	0		1	1	1	1	1	1	1	1
EAX81416	TVAG_072870	1	0	-3.13467	0	1	0	1	0		0	0	0	0	0	0	0	0		1	1	1	1	1	1	1	1
EAX81421	TVAG_072890	1	0	-3.13467	0	1	0	1	0		0	0	0	0	0	0	0	0		1	1	1	1	1	1	1	1
EAX75579	TVAG_073950	1	0	-3.13467	0	1	0	1	0		0	0	0	0	0	0	0	0		1	1	1	1	1	1	1	1
EAX86293	TVAG_074090	1	0	-3.13467	0	1	0	1	0		0	0	0	0	0	0	0	0		1	1	1	1	1	1	1	1
EAX88950	TVAG_074220	1	0	-3.13467	0	1	0	1	0		0	0	0	0	0	0	0	0		1	1	1	1	1	1	1	1
EAX82055	TVAG_079140	1	0	-3.13467	0	1	0	1	0		0	0	0	0	0	0	0	0		1	1	1	1	1	1	1	1
EAX77153	TVAG_080280	1	0	-3.13467	0	1	0	1	0		0	0	0	0	0	0	0	0		1	1	1	1	1	1	1	1
EAX82096	TVAG_081330	1	0	-3.13467	0	1	0	1	0		0	0	0	0	0	0	0	0		1	1	1	1	1	1	1	1
EAX86781	TVAG_082790	1	0	-3.13467	0	1	0	1	0		0	0	0	0	0	0	0	0		1	1	1	1	1	1	1	1
EAX80897	TVAG_084020	1	0	-3.13467	0	1	0	1	0		0	0	0	0	0	0	0	0		1	1	1	1	1	1	1	1
EAX87352	TVAG_084380	1	0	-3.13467	0	1	0	1	0		0	0	0	0	0	0	0	0		1	1	1	1	1	1	1	1
EAX73438	TVAG_085240	1	0	-3.13467	0	1	0	1	0		0	0	0	0	0	0	0	0		1	1	1	1	1	1	1	1
EAX83389	TVAG_085260	1	0	-3.13467	0	1	0	1	0		0	0	0	0	0	0	0	0		1	1	1	1	1	1	1	1
EAX83391	TVAG_085280	1	0	-3.13467	0	1	0	1	0		0	0	0	0	0	0	0	0		1	1	1	1	1	1	1	1
EAX77661	TVAG_085810	1	0	-3.13467	0	1	0	1	0		0	0	0	0	0	0	0	0		1	1	1	1	1	1	1	1
EAX81606	TVAG_086810	1	0	-3.13467	0	1	0	1	0		0	0	0	0	0	0	0	0		1	1	1	1	1	1	1	1
EAX80045	TVAG_086820	1	0	-3.13467	0	1	0	1	0		0	0	0	0	0	0	0	0		1	1	1	1	1	1	1	1
EAX80046	TVAG_086830	1	0	-3.13467	0	1	0	1	0		0	0	0	0	0	0	0	0		1	1	1	1	1	1	1	1
EAX79662	TVAG_086840	1	0	-3.13467	0	1	0	1	0		0	0	0	0	0	0	0	0		1	1	1	1	1	1	1	1
EAX80619	TVAG_086890	1	0	-3.13467	0	1	0	1	0		0	0	0	0	0	0	0	0		1	1	1	1	1	1	1	1
EAX80864	TVAG_087310	1	0	-3.13467	0	1	0	1	0		0	0	0	0	0	0	0	0		1	1	1	1	1	1	1	1
EAX80466	TVAG_087440	1	0	-3.13467	0	1	0	1	0		0	0	0	0	0	0	0	0		1	1	1	1	1	1	1	1
EAX78687	TVAG_087730	1	0	-3.13467	0	1	0	1	0		0	0	0	0	0	0	0	0		1	1	1	1	1	1	1	1
EAX77953	TVAG_087770	1	0	-3.13467	0	1	0	1	0		0	0	0	0	0	0	0	0		1	1	1	1	1	1	1	1
EAX72814	TVAG_090990	1	0	-3.13467	0	1	0	1	0		0	0	0	0	0	0	0	0		1	1	1	1	1	1	1	1
EAX73848	TVAG_091760	1	0	-3.13467	0	1	0	1	0		0	0	0	0	0	0	0	0		1	1	1	1	1	1	1	1
EAX77849	TVAG_092300	1	0	-3.13467	0	1	0	1	0		0	0	0	0	0	0	0	0		1	1	1	1	1	1	1	1
EAX80439	TVAG_092920	1	0	-3.13467	0	1	0	1	0		0	0	0	0	0	0	0	0		1	1	1	1	1	1	1	1
EAX84520	TVAG_095360	1	0	-3.13467	0	1	0	1	0		0	0	0	0	0	0	0	0		1	1	1	1	1	1	1	1
EAX79665	TVAG_095640	1	0	-3.13467	0	1	0	1	0		0	0	0	0	0	0	0	0		1	1	1	1	1	1	1	1
EAX82430	TVAG_096070	1	0	-3.13467	0	1	0	1	0		0	0	0	0	0	0	0	0		1	1	1	1	1	1	1	1
EAX82432	TVAG_096090	1	0	-3.13467	0	1	0	1	0		0	0	0	0	0	0	0	0		1	1	1	1	1	1	1	1
EAX74226	TVAG_098630	1	0	-3.13467	0	1	0	1	0		0	0	0	0	0	0	0	0		1	1	1	1	1	1	1	1
EAX77948	TVAG_098650	1	0	-3.13467	0	1	0	1	0		0	0	0	0	0	0	0	0		1	1	1	1	1	1	1	1
EAX85705	TVAG_105380	1	0	-3.13467	0	1	0	1	0		0	0	0	0	0	0	0	0		1	1	1	1	1	1	1	1
EAX80571	TVAG_105860	1	0	-3.13467	0	1	0	1	0		0	0	0	0	0	0	0	0		1	1	1	1	1	1	1	1
EAX79725	TVAG_106880	1	0	-3.13467	0	1	0	1	0		0	0	0	0	0	0	0	0		1	1	1	1	1	1	1	1
EAX85680	TVAG_111660	1	0	-3.13467	0	1	0	1	0		0	0	0	0	0	0	0	0		1	1	1	1	1	1	1	1
EAX66962	TVAG_111840	1	0	-3.13467	0	1	0	1	0		0	0	0	0	0	0	0	0		1	1	1	1	1	1	1	1
EAX88966	TVAG_112450	1	0	-3.13467	0	1	0	1	0		0	0	0	0	0	0	0	0		1	1	1	1	1	1	1	1
EAX80661	TVAG_114930	1	0	-3.13467	0	1	0	1	0		0	0	0	0	0	0	0	0		1	1	1	1	1	1	1	1
EAX87285	TVAG_115030	1	0	-3.13467	0	1	0	1	0		0	0	0	0	0	0	0	0		1	1	1	1	1	1	1	1
EAX82744	TVAG_115980	1	0	-3.13467	0	1	0	1	0		0	0	0	0	0	0	0	0		1	1	1	1	1	1	1	1
EAX78704	TVAG_115990	1	0	-3.13467	0	1	0	1	0		0	0	0	0	0	0	0	0		1	1	1	1	1	1	1	1
EAX75794	TVAG_130490	1	0	-3.13467	0	1	0	1	0		0	0	0	0	0	0	0	0		1	1	1	1	1	1	1	1
EAX84556	TVAG_131630	1	0	-3.13467	0	1	0	1	0		0	0	0	0	0	0	0	0		1	1	1	1	1	1	1	1
EAX85772	TVAG_131740	1	0	-3.13467	0	1	0	1	0		0	0	0	0	0	0	0	0		1	1	1	1	1	1	1	1
EAX85887	TVAG_132470	1	0	-3.13467	0	1	0	1	0		0	0	0	0	0	0	0	0		1	1	1	1	1	1	1	1
EAX84515	TVAG_132710	1	0	-3.13467	0	1	0	1	0		0	0	0	0	0	0	0	0		1	1	1	1	1	1	1	1
EAX84516	TVAG_132720	1	0	-3.13467	0	1	0	1	0		0	0	0	0	0	0	0	0		1	1	1	1	1	1	1	1
EAX75966	TVAG_134030	1	0	-3.13467	0	1	0	1	0		0	0	0	0	0	0	0	0		1	1	1	1	1	1	1	1
EAX75968	TVAG_134050	1	0	-3.13467	0	1	0	1	0		0	0	0	0	0	0	0	0		1	1	1	1	1	1	1	1
EAX83546	TVAG_134400	1	0	-3.13467	0	1	0	1	0		0	0	0	0	0	0	0	0		1	1	1	1	1	1	1	1
EAX79165	TVAG_136930	1	0	-3.13467	0	1	0	1	0		0	0	0	0	0	0	0	0		1	1	1	1	1	1	1	1
EAX66916	TVAG_137600	1	0	-3.13467	0	1	0	1	0		0	0	0	0	0	0	0	0		1	1	1	1	1	1	1	1
EAX82961	TVAG_138820	1	0	-3.13467	0	1	0	1	0		0	0	0	0	0	0	0	0		1	1	1	1	1	1	1	1
EAX83732	TVAG_141680	1	0	-3.13467	0	1	0	1	0		0	0	0	0	0	0	0	0		1	1	1	1	1	1	1	1
EAX74531	TVAG_141740	1	0	-3.13467	0	1	0	1	0		0	0	0	0	0	0	0	0		1	1	1	1	1	1	1	1
EAX86480	TVAG_141810	1	0	-3.13467	0	1	0	1	0		0	0	0	0	0	0	0	0		1	1	1	1	1	1	1	1
EAX86580	TVAG_142860	1	0	-3.13467	0	1	0	1	0		0	0	0	0	0	0	0	0		1	1	1	1	1	1	1	1
EAX78545	TVAG_143870	1	0	-3.13467	0	1	0	1	0		0	0	0	0	0	0	0	0		1	1	1	1	1	1	1	1
EAX89435	TVAG_143990	1	0	-3.13467	0	1	0	1	0		0	0	0	0	0	0	0	0		1	1	1	1	1	1	1	1
EAX83910	TVAG_144130	1	0	-3.13467	0	1	0	1	0		0	0	0	0	0	0	0	0		1	1	1	1	1	1	1	1
EAX83911	TVAG_144150	1	0	-3.13467	0	1	0	1	0		0	0	0	0	0	0	0	0		1	1	1	1	1	1	1	1
EAX68365	TVAG_147220	1	0	-3.13467	0	1	0	1	0		0	0	0	0	0	0	0	0		1	1	1	1	1	1	1	1
EAX78319	TVAG_147250	1	0	-3.13467	0	1	0	1	0		0	0	0	0	0	0	0	0		1	1	1	1	1	1	1	1
EAX87531	TVAG_148350	1	0	-3.13467	0	1	0	1	0		0	0	0	0	0	0	0	0		1	1	1	1	1	1	1	1
EAX68367	TVAG_151550	1	0	-3.13467	0	1	0	1	0		0	0	0	0	0	0	0	0		1	1	1	1	1	1	1	1
EAX86306	TVAG_154030	1	0	-3.13467	0	1	0	1	0		0	0	0	0	0	0	0	0		1	1	1	1	1	1	1	1
EAX86307	TVAG_154050	1	0	-3.13467	0	1	0	1	0		0	0	0	0	0	0	0	0		1	1	1	1	1	1	1	1
EAX68771	TVAG_155350	1	0	-3.13467	0	1	0	1	0		0	0	0	0	0	0	0	0		1	1	1	1	1	1	1	1
EAX78524	TVAG_155420	1	0	-3.13467	0	1	0	1	0		0	0	0	0	0	0	0	0		1	1	1	1	1	1	1	1
EAX84357	TVAG_155800	1	0	-3.13467	0	1	0	1	0		0	0	0	0	0	0	0	0		1	1	1	1	1	1	1	1
EAX77919	TVAG_156160	1	0	-3.13467	0	1	0	1	0		0	0	0	0	0	0	0	0		1	1	1	1	1	1	1	1
EAX76418	TVAG_157070	1	0	-3.13467	0	1	0	1	0		0	0	0	0	0	0	0	0		1	1	1	1	1	1	1	1
EAX74158	TVAG_158450	1	0	-3.13467	0	1	0	1	0		0	0	0	0	0	0	0	0		1	1	1	1	1	1	1	1
EAX73489	TVAG_160430	1	0	-3.13467	0	1	0	1	0		0	0	0	0	0	0	0	0		1	1	1	1	1	1	1	1
EAX84237	TVAG_160590	1	0	-3.13467	0	1	0	1	0		0	0	0	0	0	0	0	0		1	1	1	1	1	1	1	1
EAX84240	TVAG_160630	1	0	-3.13467	0	1	0	1	0		0	0	0	0	0	0	0	0		1	1	1	1	1	1	1	1
EAX70169	TVAG_161920	1	0	-3.13467	0	1	0	1	0		0	0	0	0	0	0	0	0		1	1	1	1	1	1	1	1
EAX78329	TVAG_162600	1	0	-3.13467	0	1	0	1	0		0	0	0	0	0	0	0	0		1	1	1	1	1	1	1	1
EAX73484	TVAG_165870	1	0	-3.13467	0	1	0	1	0		0	0	0	0	0	0	0	0		1	1	1	1	1	1	1	1
EAX82154	TVAG_169290	1	0	-3.13467	0	1	0	1	0		0	0	0	0	0	0	0	0		1	1	1	1	1	1	1	1
EAX82157	TVAG_169310	1	0	-3.13467	0	1	0	1	0		0	0	0	0	0	0	0	0		1	1	1	1	1	1	1	1
EAX71662	TVAG_169350	1	0	-3.13467	0	1	0	1	0		0	0	0	0	0	0	0	0		1	1	1	1	1	1	1	1
EAX70801	TVAG_170640	1	0	-3.13467	0	1	0	1	0		0	0	0	0	0	0	0	0		1	1	1	1	1	1	1	1
EAX83630	TVAG_171520	1	0	-3.13467	0	1	0	1	0		0	0	0	0	0	0	0	0		1	1	1	1	1	1	1	1
EAX82113	TVAG_173480	1	0	-3.13467	0	1	0	1	0		0	0	0	0	0	0	0	0		1	1	1	1	1	1	1	1
EAX81911	TVAG_173500	1	0	-3.13467	0	1	0	1	0		0	0	0	0	0	0	0	0		1	1	1	1	1	1	1	1
EAX78415	TVAG_174990	1	0	-3.13467	0	1	0	1	0		0	0	0	0	0	0	0	0		1	1	1	1	1	1	1	1
EAX69892	TVAG_175310	1	0	-3.13467	0	1	0	1	0		0	0	0	0	0	0	0	0		1	1	1	1	1	1	1	1
EAX72973	TVAG_175810	1	0	-3.13467	0	1	0	1	0		0	0	0	0	0	0	0	0		1	1	1	1	1	1	1	1
EAX87434	TVAG_176370	1	0	-3.13467	0	1	0	1	0		0	0	0	0	0	0	0	0		1	1	1	1	1	1	1	1
EAX88381	TVAG_177260	1	0	-3.13467	0	1	0	1	0		0	0	0	0	0	0	0	0		1	1	1	1	1	1	1	1
EAX82220	TVAG_179510	1	0	-3.13467	0	1	0	1	0		0	0	0	0	0	0	0	0		1	1	1	1	1	1	1	1
EAX82222	TVAG_179530	1	0	-3.13467	0	1	0	1	0		0	0	0	0	0	0	0	0		1	1	1	1	1	1	1	1
EAX71999	TVAG_180650	1	0	-3.13467	0	1	0	1	0		0	0	0	0	0	0	0	0		1	1	1	1	1	1	1	1
EAX83892	TVAG_181170	1	0	-3.13467	0	1	0	1	0		0	0	0	0	0	0	0	0		1	1	1	1	1	1	1	1
EAX84073	TVAG_181400	1	0	-3.13467	0	1	0	1	0		0	0	0	0	0	0	0	0		1	1	1	1	1	1	1	1
EAX76872	TVAG_186940	1	0	-3.13467	0	1	0	1	0		0	0	0	0	0	0	0	0		1	1	1	1	1	1	1	1
EAX71140	TVAG_190750	1	0	-3.13467	0	1	0	1	0		0	0	0	0	0	0	0	0		1	1	1	1	1	1	1	1
EAX83845	TVAG_193940	1	0	-3.13467	0	1	0	1	0		0	0	0	0	0	0	0	0		1	1	1	1	1	1	1	1
EAX83846	TVAG_193950	1	0	-3.13467	0	1	0	1	0		0	0	0	0	0	0	0	0		1	1	1	1	1	1	1	1
EAX86257	TVAG_194020	1	0	-3.13467	0	1	0	1	0		0	0	0	0	0	0	0	0		1	1	1	1	1	1	1	1
EAX81142	TVAG_194110	1	0	-3.13467	0	1	0	1	0		0	0	0	0	0	0	0	0		1	1	1	1	1	1	1	1
EAX83384	TVAG_195160	1	0	-3.13467	0	1	0	1	0		0	0	0	0	0	0	0	0		1	1	1	1	1	1	1	1
EAX83388	TVAG_195180	1	0	-3.13467	0	1	0	1	0		0	0	0	0	0	0	0	0		1	1	1	1	1	1	1	1
EAX82712	TVAG_196360	1	0	-3.13467	0	1	0	1	0		0	0	0	0	0	0	0	0		1	1	1	1	1	1	1	1
EAX82713	TVAG_196380	1	0	-3.13467	0	1	0	1	0		0	0	0	0	0	0	0	0		1	1	1	1	1	1	1	1
EAX81194	TVAG_200120	1	0	-3.13467	0	1	0	1	0		0	0	0	0	0	0	0	0		1	1	1	1	1	1	1	1
EAX82963	TVAG_200260	1	0	-3.13467	0	1	0	1	0		0	0	0	0	0	0	0	0		1	1	1	1	1	1	1	1
EAX86157	TVAG_200360	1	0	-3.13467	0	1	0	1	0		0	0	0	0	0	0	0	0		1	1	1	1	1	1	1	1
EAX79631	TVAG_200780	1	0	-3.13467	0	1	0	1	0		0	0	0	0	0	0	0	0		1	1	1	1	1	1	1	1
EAX84173	TVAG_201530	1	0	-3.13467	0	1	0	1	0		0	0	0	0	0	0	0	0		1	1	1	1	1	1	1	1
EAX75387	TVAG_203050	1	0	-3.13467	0	1	0	1	0		0	0	0	0	0	0	0	0		1	1	1	1	1	1	1	1
EAX68931	TVAG_207180	1	0	-3.13467	0	1	0	1	0		0	0	0	0	0	0	0	0		1	1	1	1	1	1	1	1
EAX85059	TVAG_207700	1	0	-3.13467	0	1	0	1	0		0	0	0	0	0	0	0	0		1	1	1	1	1	1	1	1
EAX69495	TVAG_209490	1	0	-3.13467	0	1	0	1	0		0	0	0	0	0	0	0	0		1	1	1	1	1	1	1	1
EAX81426	TVAG_214970	1	0	-3.13467	0	1	0	1	0		0	0	0	0	0	0	0	0		1	1	1	1	1	1	1	1
EAX83970	TVAG_215580	1	0	-3.13467	0	1	0	1	0		0	0	0	0	0	0	0	0		1	1	1	1	1	1	1	1
EAX83972	TVAG_215600	1	0	-3.13467	0	1	0	1	0		0	0	0	0	0	0	0	0		1	1	1	1	1	1	1	1
EAX72825	TVAG_216690	1	0	-3.13467	0	1	0	1	0		0	0	0	0	0	0	0	0		1	1	1	1	1	1	1	1
EAX85731	TVAG_218410	1	0	-3.13467	0	1	0	1	0		0	0	0	0	0	0	0	0		1	1	1	1	1	1	1	1
EAX85739	TVAG_218430	1	0	-3.13467	0	1	0	1	0		0	0	0	0	0	0	0	0		1	1	1	1	1	1	1	1
EAX86746	TVAG_218630	1	0	-3.13467	0	1	0	1	0		0	0	0	0	0	0	0	0		1	1	1	1	1	1	1	1
EAX86005	TVAG_219040	1	0	-3.13467	0	1	0	1	0		0	0	0	0	0	0	0	0		1	1	1	1	1	1	1	1
EAX83352	TVAG_220040	1	0	-3.13467	0	1	0	1	0		0	0	0	0	0	0	0	0		1	1	1	1	1	1	1	1
EAX85506	TVAG_220140	1	0	-3.13467	0	1	0	1	0		0	0	0	0	0	0	0	0		1	1	1	1	1	1	1	1
EAX85508	TVAG_220160	1	0	-3.13467	0	1	0	1	0		0	0	0	0	0	0	0	0		1	1	1	1	1	1	1	1
EAX81161	TVAG_220170	1	0	-3.13467	0	1	0	1	0		0	0	0	0	0	0	0	0		1	1	1	1	1	1	1	1
EAX73373	TVAG_222960	1	0	-3.13467	0	1	0	1	0		0	0	0	0	0	0	0	0		1	1	1	1	1	1	1	1
EAX84996	TVAG_223800	1	0	-3.13467	0	1	0	1	0		0	0	0	0	0	0	0	0		1	1	1	1	1	1	1	1
EAX84998	TVAG_223820	1	0	-3.13467	0	1	0	1	0		0	0	0	0	0	0	0	0		1	1	1	1	1	1	1	1
EAX84999	TVAG_223830	1	0	-3.13467	0	1	0	1	0		0	0	0	0	0	0	0	0		1	1	1	1	1	1	1	1
EAX80104	TVAG_227920	1	0	-3.13467	0	1	0	1	0		0	0	0	0	0	0	0	0		1	1	1	1	1	1	1	1
EAX84180	TVAG_229730	1	0	-3.13467	0	1	0	1	0		0	0	0	0	0	0	0	0		1	1	1	1	1	1	1	1
EAX84184	TVAG_229750	1	0	-3.13467	0	1	0	1	0		0	0	0	0	0	0	0	0		1	1	1	1	1	1	1	1
EAX72483	TVAG_231710	1	0	-3.13467	0	1	0	1	0		0	0	0	0	0	0	0	0		1	1	1	1	1	1	1	1
EAX86350	TVAG_233870	1	0	-3.13467	0	1	0	1	0		0	0	0	0	0	0	0	0		1	1	1	1	1	1	1	1
EAX80229	TVAG_236290	1	0	-3.13467	0	1	0	1	0		0	0	0	0	0	0	0	0		1	1	1	1	1	1	1	1
EAX80231	TVAG_236310	1	0	-3.13467	0	1	0	1	0		0	0	0	0	0	0	0	0		1	1	1	1	1	1	1	1
EAX74597	TVAG_236420	1	0	-3.13467	0	1	0	1	0		0	0	0	0	0	0	0	0		1	1	1	1	1	1	1	1
EAX74599	TVAG_236440	1	0	-3.13467	0	1	0	1	0		0	0	0	0	0	0	0	0		1	1	1	1	1	1	1	1
EAX83080	TVAG_242150	1	0	-3.13467	0	1	0	1	0		0	0	0	0	0	0	0	0		1	1	1	1	1	1	1	1
EAX74774	TVAG_242530	1	0	-3.13467	0	1	0	1	0		0	0	0	0	0	0	0	0		1	1	1	1	1	1	1	1
EAX71820	TVAG_242720	1	0	-3.13467	0	1	0	1	0		0	0	0	0	0	0	0	0		1	1	1	1	1	1	1	1
EAX78152	TVAG_243030	1	0	-3.13467	0	1	0	1	0		0	0	0	0	0	0	0	0		1	1	1	1	1	1	1	1
EAX75472	TVAG_244200	1	0	-3.13467	0	1	0	1	0		0	0	0	0	0	0	0	0		1	1	1	1	1	1	1	1
EAX82217	TVAG_244640	1	0	-3.13467	0	1	0	1	0		0	0	0	0	0	0	0	0		1	1	1	1	1	1	1	1
EAX85082	TVAG_245540	1	0	-3.13467	0	1	0	1	0		0	0	0	0	0	0	0	0		1	1	1	1	1	1	1	1
EAX82018	TVAG_245630	1	0	-3.13467	0	1	0	1	0		0	0	0	0	0	0	0	0		1	1	1	1	1	1	1	1
EAX85095	TVAG_247730	1	0	-3.13467	0	1	0	1	0		0	0	0	0	0	0	0	0		1	1	1	1	1	1	1	1
EAX78175	TVAG_248140	1	0	-3.13467	0	1	0	1	0		0	0	0	0	0	0	0	0		1	1	1	1	1	1	1	1
EAX77549	TVAG_251140	1	0	-3.13467	0	1	0	1	0		0	0	0	0	0	0	0	0		1	1	1	1	1	1	1	1
EAX81601	TVAG_252100	1	0	-3.13467	0	1	0	1	0		0	0	0	0	0	0	0	0		1	1	1	1	1	1	1	1
EAX84979	TVAG_252780	1	0	-3.13467	0	1	0	1	0		0	0	0	0	0	0	0	0		1	1	1	1	1	1	1	1
EAX84022	TVAG_252810	1	0	-3.13467	0	1	0	1	0		0	0	0	0	0	0	0	0		1	1	1	1	1	1	1	1
EAX71189	TVAG_253310	1	0	-3.13467	0	1	0	1	0		0	0	0	0	0	0	0	0		1	1	1	1	1	1	1	1
EAX73978	TVAG_253340	1	0	-3.13467	0	1	0	1	0		0	0	0	0	0	0	0	0		1	1	1	1	1	1	1	1
EAX76403	TVAG_255000	1	0	-3.13467	0	1	0	1	0		0	0	0	0	0	0	0	0		1	1	1	1	1	1	1	1
EAX82681	TVAG_256910	1	0	-3.13467	0	1	0	1	0		0	0	0	0	0	0	0	0		1	1	1	1	1	1	1	1
EAX82682	TVAG_256930	1	0	-3.13467	0	1	0	1	0		0	0	0	0	0	0	0	0		1	1	1	1	1	1	1	1
EAX80983	TVAG_258660	1	0	-3.13467	0	1	0	1	0		0	0	0	0	0	0	0	0		1	1	1	1	1	1	1	1
EAX80986	TVAG_258680	1	0	-3.13467	0	1	0	1	0		0	0	0	0	0	0	0	0		1	1	1	1	1	1	1	1
EAX71349	TVAG_261370	1	0	-3.13467	0	1	0	1	0		0	0	0	0	0	0	0	0		1	1	1	1	1	1	1	1
EAX70965	TVAG_264530	1	0	-3.13467	0	1	0	1	0		0	0	0	0	0	0	0	0		1	1	1	1	1	1	1	1
EAX86155	TVAG_264610	1	0	-3.13467	0	1	0	1	0		0	0	0	0	0	0	0	0		1	1	1	1	1	1	1	1
EAX73164	TVAG_265590	1	0	-3.13467	0	1	0	1	0		0	0	0	0	0	0	0	0		1	1	1	1	1	1	1	1
EAX87070	TVAG_266100	1	0	-3.13467	0	1	0	1	0		0	0	0	0	0	0	0	0		1	1	1	1	1	1	1	1
EAX86568	TVAG_269410	1	0	-3.13467	0	1	0	1	0		0	0	0	0	0	0	0	0		1	1	1	1	1	1	1	1
EAX86569	TVAG_269420	1	0	-3.13467	0	1	0	1	0		0	0	0	0	0	0	0	0		1	1	1	1	1	1	1	1
EAX86657	TVAG_272530	1	0	-3.13467	0	1	0	1	0		0	0	0	0	0	0	0	0		1	1	1	1	1	1	1	1
EAX81135	TVAG_274430	1	0	-3.13467	0	1	0	1	0		0	0	0	0	0	0	0	0		1	1	1	1	1	1	1	1
EAX81047	TVAG_277200	1	0	-3.13467	0	1	0	1	0		0	0	0	0	0	0	0	0		1	1	1	1	1	1	1	1
EAX68907	TVAG_277500	1	0	-3.13467	0	1	0	1	0		0	0	0	0	0	0	0	0		1	1	1	1	1	1	1	1
EAX68909	TVAG_277520	1	0	-3.13467	0	1	0	1	0		0	0	0	0	0	0	0	0		1	1	1	1	1	1	1	1
EAX83622	TVAG_279020	1	0	-3.13467	0	1	0	1	0		0	0	0	0	0	0	0	0		1	1	1	1	1	1	1	1
EAX83623	TVAG_279030	1	0	-3.13467	0	1	0	1	0		0	0	0	0	0	0	0	0		1	1	1	1	1	1	1	1
EAX76249	TVAG_279280	1	0	-3.13467	0	1	0	1	0		0	0	0	0	0	0	0	0		1	1	1	1	1	1	1	1
EAX87210	TVAG_279290	1	0	-3.13467	0	1	0	1	0		0	0	0	0	0	0	0	0		1	1	1	1	1	1	1	1
EAX83277	TVAG_279500	1	0	-3.13467	0	1	0	1	0		0	0	0	0	0	0	0	0		1	1	1	1	1	1	1	1
EAX83283	TVAG_279520	1	0	-3.13467	0	1	0	1	0		0	0	0	0	0	0	0	0		1	1	1	1	1	1	1	1
EAX76416	TVAG_280210	1	0	-3.13467	0	1	0	1	0		0	0	0	0	0	0	0	0		1	1	1	1	1	1	1	1
EAX80911	TVAG_280290	1	0	-3.13467	0	1	0	1	0		0	0	0	0	0	0	0	0		1	1	1	1	1	1	1	1
EAX72481	TVAG_280300	1	0	-3.13467	0	1	0	1	0		0	0	0	0	0	0	0	0		1	1	1	1	1	1	1	1
EAX81659	TVAG_281680	1	0	-3.13467	0	1	0	1	0		0	0	0	0	0	0	0	0		1	1	1	1	1	1	1	1
EAX83781	TVAG_283990	1	0	-3.13467	0	1	0	1	0		0	0	0	0	0	0	0	0		1	1	1	1	1	1	1	1
EAX85345	TVAG_285170	1	0	-3.13467	0	1	0	1	0		0	0	0	0	0	0	0	0		1	1	1	1	1	1	1	1
EAX85185	TVAG_285850	1	0	-3.13467	0	1	0	1	0		0	0	0	0	0	0	0	0		1	1	1	1	1	1	1	1
EAX81664	TVAG_287960	1	0	-3.13467	0	1	0	1	0		0	0	0	0	0	0	0	0		1	1	1	1	1	1	1	1
EAX74644	TVAG_288740	1	0	-3.13467	0	1	0	1	0		0	0	0	0	0	0	0	0		1	1	1	1	1	1	1	1
EAX83439	TVAG_289920	1	0	-3.13467	0	1	0	1	0		0	0	0	0	0	0	0	0		1	1	1	1	1	1	1	1
EAX77099	TVAG_290750	1	0	-3.13467	0	1	0	1	0		0	0	0	0	0	0	0	0		1	1	1	1	1	1	1	1
EAX85689	TVAG_293970	1	0	-3.13467	0	1	0	1	0		0	0	0	0	0	0	0	0		1	1	1	1	1	1	1	1
EAX80780	TVAG_294450	1	0	-3.13467	0	1	0	1	0		0	0	0	0	0	0	0	0		1	1	1	1	1	1	1	1
EAX82953	TVAG_294540	1	0	-3.13467	0	1	0	1	0		0	0	0	0	0	0	0	0		1	1	1	1	1	1	1	1
EAX82956	TVAG_294560	1	0	-3.13467	0	1	0	1	0		0	0	0	0	0	0	0	0		1	1	1	1	1	1	1	1
EAX80434	TVAG_297910	1	0	-3.13467	0	1	0	1	0		0	0	0	0	0	0	0	0		1	1	1	1	1	1	1	1
EAX80436	TVAG_297930	1	0	-3.13467	0	1	0	1	0		0	0	0	0	0	0	0	0		1	1	1	1	1	1	1	1
EAX84896	TVAG_298820	1	0	-3.13467	0	1	0	1	0		0	0	0	0	0	0	0	0		1	1	1	1	1	1	1	1
EAX83249	TVAG_298860	1	0	-3.13467	0	1	0	1	0		0	0	0	0	0	0	0	0		1	1	1	1	1	1	1	1
EAX83251	TVAG_298880	1	0	-3.13467	0	1	0	1	0		0	0	0	0	0	0	0	0		1	1	1	1	1	1	1	1
EAX78861	TVAG_298890	1	0	-3.13467	0	1	0	1	0		0	0	0	0	0	0	0	0		1	1	1	1	1	1	1	1
EAX85748	TVAG_298990	1	0	-3.13467	0	1	0	1	0		0	0	0	0	0	0	0	0		1	1	1	1	1	1	1	1
EAX67675	TVAG_300210	1	0	-3.13467	0	1	0	1	0		0	0	0	0	0	0	0	0		1	1	1	1	1	1	1	1
EAX82083	TVAG_305670	1	0	-3.13467	0	1	0	1	0		0	0	0	0	0	0	0	0		1	1	1	1	1	1	1	1
EAX82087	TVAG_305690	1	0	-3.13467	0	1	0	1	0		0	0	0	0	0	0	0	0		1	1	1	1	1	1	1	1
EAX88056	TVAG_307540	1	0	-3.13467	0	1	0	1	0		0	0	0	0	0	0	0	0		1	1	1	1	1	1	1	1
EAX74395	TVAG_307550	1	0	-3.13467	0	1	0	1	0		0	0	0	0	0	0	0	0		1	1	1	1	1	1	1	1
EAX83555	TVAG_308790	1	0	-3.13467	0	1	0	1	0		0	0	0	0	0	0	0	0		1	1	1	1	1	1	1	1
EAX81843	TVAG_310610	1	0	-3.13467	0	1	0	1	0		0	0	0	0	0	0	0	0		1	1	1	1	1	1	1	1
EAX74944	TVAG_311480	1	0	-3.13467	0	1	0	1	0		0	0	0	0	0	0	0	0		1	1	1	1	1	1	1	1
EAX78742	TVAG_311940	1	0	-3.13467	0	1	0	1	0		0	0	0	0	0	0	0	0		1	1	1	1	1	1	1	1
EAX77553	TVAG_314270	1	0	-3.13467	0	1	0	1	0		0	0	0	0	0	0	0	0		1	1	1	1	1	1	1	1
EAX82327	TVAG_314320	1	0	-3.13467	0	1	0	1	0		0	0	0	0	0	0	0	0		1	1	1	1	1	1	1	1
EAX88746	TVAG_316510	1	0	-3.13467	0	1	0	1	0		0	0	0	0	0	0	0	0		1	1	1	1	1	1	1	1
EAX86600	TVAG_317370	1	0	-3.13467	0	1	0	1	0		0	0	0	0	0	0	0	0		1	1	1	1	1	1	1	1
EAX86602	TVAG_317390	1	0	-3.13467	0	1	0	1	0		0	0	0	0	0	0	0	0		1	1	1	1	1	1	1	1
EAX88324	TVAG_318350	1	0	-3.13467	0	1	0	1	0		0	0	0	0	0	0	0	0		1	1	1	1	1	1	1	1
EAX81466	TVAG_318610	1	0	-3.13467	0	1	0	1	0		0	0	0	0	0	0	0	0		1	1	1	1	1	1	1	1
EAX84001	TVAG_319180	1	0	-3.13467	0	1	0	1	0		0	0	0	0	0	0	0	0		1	1	1	1	1	1	1	1
EAX84002	TVAG_319190	1	0	-3.13467	0	1	0	1	0		0	0	0	0	0	0	0	0		1	1	1	1	1	1	1	1
EAX82972	TVAG_320880	1	0	-3.13467	0	1	0	1	0		0	0	0	0	0	0	0	0		1	1	1	1	1	1	1	1
EAX82444	TVAG_323250	1	0	-3.13467	0	1	0	1	0		0	0	0	0	0	0	0	0		1	1	1	1	1	1	1	1
EAX85647	TVAG_323520	1	0	-3.13467	0	1	0	1	0		0	0	0	0	0	0	0	0		1	1	1	1	1	1	1	1
EAX85648	TVAG_323530	1	0	-3.13467	0	1	0	1	0		0	0	0	0	0	0	0	0		1	1	1	1	1	1	1	1
EAX85627	TVAG_325220	1	0	-3.13467	0	1	0	1	0		0	0	0	0	0	0	0	0		1	1	1	1	1	1	1	1
EAX85628	TVAG_325230	1	0	-3.13467	0	1	0	1	0		0	0	0	0	0	0	0	0		1	1	1	1	1	1	1	1
EAX86520	TVAG_325950	1	0	-3.13467	0	1	0	1	0		0	0	0	0	0	0	0	0		1	1	1	1	1	1	1	1
EAX75885	TVAG_326100	1	0	-3.13467	0	1	0	1	0		0	0	0	0	0	0	0	0		1	1	1	1	1	1	1	1
EAX68214	TVAG_326160	1	0	-3.13467	0	1	0	1	0		0	0	0	0	0	0	0	0		1	1	1	1	1	1	1	1
EAX85711	TVAG_327230	1	0	-3.13467	0	1	0	1	0		0	0	0	0	0	0	0	0		1	1	1	1	1	1	1	1
EAX89529	TVAG_327780	1	0	-3.13467	0	1	0	1	0		0	0	0	0	0	0	0	0		1	1	1	1	1	1	1	1
EAX83665	TVAG_328820	1	0	-3.13467	0	1	0	1	0		0	0	0	0	0	0	0	0		1	1	1	1	1	1	1	1
EAX82420	TVAG_330870	1	0	-3.13467	0	1	0	1	0		0	0	0	0	0	0	0	0		1	1	1	1	1	1	1	1
EAX73616	TVAG_331780	1	0	-3.13467	0	1	0	1	0		0	0	0	0	0	0	0	0		1	1	1	1	1	1	1	1
EAX67120	TVAG_332710	1	0	-3.13467	0	1	0	1	0		0	0	0	0	0	0	0	0		1	1	1	1	1	1	1	1
EAX79369	TVAG_333440	1	0	-3.13467	0	1	0	1	0		0	0	0	0	0	0	0	0		1	1	1	1	1	1	1	1
EAX83406	TVAG_334600	1	0	-3.13467	0	1	0	1	0		0	0	0	0	0	0	0	0		1	1	1	1	1	1	1	1
EAX83409	TVAG_334620	1	0	-3.13467	0	1	0	1	0		0	0	0	0	0	0	0	0		1	1	1	1	1	1	1	1
EAX85022	TVAG_334700	1	0	-3.13467	0	1	0	1	0		0	0	0	0	0	0	0	0		1	1	1	1	1	1	1	1
EAX82229	TVAG_335210	1	0	-3.13467	0	1	0	1	0		0	0	0	0	0	0	0	0		1	1	1	1	1	1	1	1
EAX82231	TVAG_335230	1	0	-3.13467	0	1	0	1	0		0	0	0	0	0	0	0	0		1	1	1	1	1	1	1	1
EAX81825	TVAG_336430	1	0	-3.13467	0	1	0	1	0		0	0	0	0	0	0	0	0		1	1	1	1	1	1	1	1
EAX81827	TVAG_336450	1	0	-3.13467	0	1	0	1	0		0	0	0	0	0	0	0	0		1	1	1	1	1	1	1	1
EAX71479	TVAG_336480	1	0	-3.13467	0	1	0	1	0		0	0	0	0	0	0	0	0		1	1	1	1	1	1	1	1
EAX80315	TVAG_337130	1	0	-3.13467	0	1	0	1	0		0	0	0	0	0	0	0	0		1	1	1	1	1	1	1	1
EAX86910	TVAG_338310	1	0	-3.13467	0	1	0	1	0		0	0	0	0	0	0	0	0		1	1	1	1	1	1	1	1
EAX86913	TVAG_338330	1	0	-3.13467	0	1	0	1	0		0	0	0	0	0	0	0	0		1	1	1	1	1	1	1	1
EAX73028	TVAG_338350	1	0	-3.13467	0	1	0	1	0		0	0	0	0	0	0	0	0		1	1	1	1	1	1	1	1
EAX83097	TVAG_338390	1	0	-3.13467	0	1	0	1	0		0	0	0	0	0	0	0	0		1	1	1	1	1	1	1	1
EAX83468	TVAG_343900	1	0	-3.13467	0	1	0	1	0		0	0	0	0	0	0	0	0		1	1	1	1	1	1	1	1
EAX81055	TVAG_345990	1	0	-3.13467	0	1	0	1	0		0	0	0	0	0	0	0	0		1	1	1	1	1	1	1	1
EAX74106	TVAG_346050	1	0	-3.13467	0	1	0	1	0		0	0	0	0	0	0	0	0		1	1	1	1	1	1	1	1
EAX76506	TVAG_347030	1	0	-3.13467	0	1	0	1	0		0	0	0	0	0	0	0	0		1	1	1	1	1	1	1	1
EAX76509	TVAG_347050	1	0	-3.13467	0	1	0	1	0		0	0	0	0	0	0	0	0		1	1	1	1	1	1	1	1
EAX70834	TVAG_347750	1	0	-3.13467	0	1	0	1	0		0	0	0	0	0	0	0	0		1	1	1	1	1	1	1	1
EAX84901	TVAG_348850	1	0	-3.13467	0	1	0	1	0		0	0	0	0	0	0	0	0		1	1	1	1	1	1	1	1
EAX84907	TVAG_348870	1	0	-3.13467	0	1	0	1	0		0	0	0	0	0	0	0	0		1	1	1	1	1	1	1	1
EAX70889	TVAG_348960	1	0	-3.13467	0	1	0	1	0		0	0	0	0	0	0	0	0		1	1	1	1	1	1	1	1
EAX87839	TVAG_349090	1	0	-3.13467	0	1	0	1	0		0	0	0	0	0	0	0	0		1	1	1	1	1	1	1	1
EAX77853	TVAG_351000	1	0	-3.13467	0	1	0	1	0		0	0	0	0	0	0	0	0		1	1	1	1	1	1	1	1
EAX81934	TVAG_351250	1	0	-3.13467	0	1	0	1	0		0	0	0	0	0	0	0	0		1	1	1	1	1	1	1	1
EAX81936	TVAG_351270	1	0	-3.13467	0	1	0	1	0		0	0	0	0	0	0	0	0		1	1	1	1	1	1	1	1
EAX84203	TVAG_357280	1	0	-3.13467	0	1	0	1	0		0	0	0	0	0	0	0	0		1	1	1	1	1	1	1	1
EAX84204	TVAG_357290	1	0	-3.13467	0	1	0	1	0		0	0	0	0	0	0	0	0		1	1	1	1	1	1	1	1
EAX87504	TVAG_358540	1	0	-3.13467	0	1	0	1	0		0	0	0	0	0	0	0	0		1	1	1	1	1	1	1	1
EAX75800	TVAG_360240	1	0	-3.13467	0	1	0	1	0		0	0	0	0	0	0	0	0		1	1	1	1	1	1	1	1
EAX75801	TVAG_360260	1	0	-3.13467	0	1	0	1	0		0	0	0	0	0	0	0	0		1	1	1	1	1	1	1	1
EAX67626	TVAG_360460	1	0	-3.13467	0	1	0	1	0		0	0	0	0	0	0	0	0		1	1	1	1	1	1	1	1
EAX82519	TVAG_361690	1	0	-3.13467	0	1	0	1	0		0	0	0	0	0	0	0	0		1	1	1	1	1	1	1	1
EAX84031	TVAG_362160	1	0	-3.13467	0	1	0	1	0		0	0	0	0	0	0	0	0		1	1	1	1	1	1	1	1
EAX78844	TVAG_363370	1	0	-3.13467	0	1	0	1	0		0	0	0	0	0	0	0	0		1	1	1	1	1	1	1	1
EAX82503	TVAG_363480	1	0	-3.13467	0	1	0	1	0		0	0	0	0	0	0	0	0		1	1	1	1	1	1	1	1
EAX85411	TVAG_364780	1	0	-3.13467	0	1	0	1	0		0	0	0	0	0	0	0	0		1	1	1	1	1	1	1	1
EAX89898	TVAG_366970	1	0	-3.13467	0	1	0	1	0		0	0	0	0	0	0	0	0		1	1	1	1	1	1	1	1
EAX85813	TVAG_367230	1	0	-3.13467	0	1	0	1	0		0	0	0	0	0	0	0	0		1	1	1	1	1	1	1	1
EAX85264	TVAG_367240	1	0	-3.13467	0	1	0	1	0		0	0	0	0	0	0	0	0		1	1	1	1	1	1	1	1
EAX76027	TVAG_370640	1	0	-3.13467	0	1	0	1	0		0	0	0	0	0	0	0	0		1	1	1	1	1	1	1	1
EAX76029	TVAG_370660	1	0	-3.13467	0	1	0	1	0		0	0	0	0	0	0	0	0		1	1	1	1	1	1	1	1
EAX77001	TVAG_375420	1	0	-3.13467	0	1	0	1	0		0	0	0	0	0	0	0	0		1	1	1	1	1	1	1	1
EAX76329	TVAG_375960	1	0	-3.13467	0	1	0	1	0		0	0	0	0	0	0	0	0		1	1	1	1	1	1	1	1
EAX76331	TVAG_375980	1	0	-3.13467	0	1	0	1	0		0	0	0	0	0	0	0	0		1	1	1	1	1	1	1	1
EAX83575	TVAG_376920	1	0	-3.13467	0	1	0	1	0		0	0	0	0	0	0	0	0		1	1	1	1	1	1	1	1
EAX85968	TVAG_377040	1	0	-3.13467	0	1	0	1	0		0	0	0	0	0	0	0	0		1	1	1	1	1	1	1	1
EAX83023	TVAG_377060	1	0	-3.13467	0	1	0	1	0		0	0	0	0	0	0	0	0		1	1	1	1	1	1	1	1
EAX83026	TVAG_377080	1	0	-3.13467	0	1	0	1	0		0	0	0	0	0	0	0	0		1	1	1	1	1	1	1	1
EAX81186	TVAG_377260	1	0	-3.13467	0	1	0	1	0		0	0	0	0	0	0	0	0		1	1	1	1	1	1	1	1
EAX79805	TVAG_377630	1	0	-3.13467	0	1	0	1	0		0	0	0	0	0	0	0	0		1	1	1	1	1	1	1	1
EAX78943	TVAG_381260	1	0	-3.13467	0	1	0	1	0		0	0	0	0	0	0	0	0		1	1	1	1	1	1	1	1
EAX87579	TVAG_382100	1	0	-3.13467	0	1	0	1	0		0	0	0	0	0	0	0	0		1	1	1	1	1	1	1	1
EAX69338	TVAG_383010	1	0	-3.13467	0	1	0	1	0		0	0	0	0	0	0	0	0		1	1	1	1	1	1	1	1
EAX76377	TVAG_383390	1	0	-3.13467	0	1	0	1	0		0	0	0	0	0	0	0	0		1	1	1	1	1	1	1	1
EAX70046	TVAG_383850	1	0	-3.13467	0	1	0	1	0		0	0	0	0	0	0	0	0		1	1	1	1	1	1	1	1
EAX80733	TVAG_384780	1	0	-3.13467	0	1	0	1	0		0	0	0	0	0	0	0	0		1	1	1	1	1	1	1	1
EAX69150	TVAG_385140	1	0	-3.13467	0	1	0	1	0		0	0	0	0	0	0	0	0		1	1	1	1	1	1	1	1
EAX76760	TVAG_387330	1	0	-3.13467	0	1	0	1	0		0	0	0	0	0	0	0	0		1	1	1	1	1	1	1	1
EAX81561	TVAG_387570	1	0	-3.13467	0	1	0	1	0		0	0	0	0	0	0	0	0		1	1	1	1	1	1	1	1
EAX81563	TVAG_387590	1	0	-3.13467	0	1	0	1	0		0	0	0	0	0	0	0	0		1	1	1	1	1	1	1	1
EAX74601	TVAG_389040	1	0	-3.13467	0	1	0	1	0		0	0	0	0	0	0	0	0		1	1	1	1	1	1	1	1
EAX73988	TVAG_391990	1	0	-3.13467	0	1	0	1	0		0	0	0	0	0	0	0	0		1	1	1	1	1	1	1	1
EAX73989	TVAG_392000	1	0	-3.13467	0	1	0	1	0		0	0	0	0	0	0	0	0		1	1	1	1	1	1	1	1
EAX81073	TVAG_393690	1	0	-3.13467	0	1	0	1	0		0	0	0	0	0	0	0	0		1	1	1	1	1	1	1	1
EAX81337	TVAG_395970	1	0	-3.13467	0	1	0	1	0		0	0	0	0	0	0	0	0		1	1	1	1	1	1	1	1
EAX81692	TVAG_398410	1	0	-3.13467	0	1	0	1	0		0	0	0	0	0	0	0	0		1	1	1	1	1	1	1	1
EAX72857	TVAG_400470	1	0	-3.13467	0	1	0	1	0		0	0	0	0	0	0	0	0		1	1	1	1	1	1	1	1
EAX85392	TVAG_402870	1	0	-3.13467	0	1	0	1	0		0	0	0	0	0	0	0	0		1	1	1	1	1	1	1	1
EAX76963	TVAG_403100	1	0	-3.13467	0	1	0	1	0		0	0	0	0	0	0	0	0		1	1	1	1	1	1	1	1
EAX80306	TVAG_403520	1	0	-3.13467	0	1	0	1	0		0	0	0	0	0	0	0	0		1	1	1	1	1	1	1	1
EAX83875	TVAG_403940	1	0	-3.13467	0	1	0	1	0		0	0	0	0	0	0	0	0		1	1	1	1	1	1	1	1
EAX77262	TVAG_404480	1	0	-3.13467	0	1	0	1	0		0	0	0	0	0	0	0	0		1	1	1	1	1	1	1	1
EAX77791	TVAG_405350	1	0	-3.13467	0	1	0	1	0		0	0	0	0	0	0	0	0		1	1	1	1	1	1	1	1
EAX89998	TVAG_405440	1	0	-3.13467	0	1	0	1	0		0	0	0	0	0	0	0	0		1	1	1	1	1	1	1	1
EAX74718	TVAG_407840	1	0	-3.13467	0	1	0	1	0		0	0	0	0	0	0	0	0		1	1	1	1	1	1	1	1
EAX85856	TVAG_408540	1	0	-3.13467	0	1	0	1	0		0	0	0	0	0	0	0	0		1	1	1	1	1	1	1	1
EAX81374	TVAG_409080	1	0	-3.13467	0	1	0	1	0		0	0	0	0	0	0	0	0		1	1	1	1	1	1	1	1
EAX81375	TVAG_409090	1	0	-3.13467	0	1	0	1	0		0	0	0	0	0	0	0	0		1	1	1	1	1	1	1	1
EAX80421	TVAG_409450	1	0	-3.13467	0	1	0	1	0		0	0	0	0	0	0	0	0		1	1	1	1	1	1	1	1
EAX76398	TVAG_411640	1	0	-3.13467	0	1	0	1	0		0	0	0	0	0	0	0	0		1	1	1	1	1	1	1	1
EAX86248	TVAG_413640	1	0	-3.13467	0	1	0	1	0		0	0	0	0	0	0	0	0		1	1	1	1	1	1	1	1
EAX86253	TVAG_413660	1	0	-3.13467	0	1	0	1	0		0	0	0	0	0	0	0	0		1	1	1	1	1	1	1	1
EAX77867	TVAG_414720	1	0	-3.13467	0	1	0	1	0		0	0	0	0	0	0	0	0		1	1	1	1	1	1	1	1
EAX73562	TVAG_416850	1	0	-3.13467	0	1	0	1	0		0	0	0	0	0	0	0	0		1	1	1	1	1	1	1	1
EAX86509	TVAG_417570	1	0	-3.13467	0	1	0	1	0		0	0	0	0	0	0	0	0		1	1	1	1	1	1	1	1
EAX84016	TVAG_419310	1	0	-3.13467	0	1	0	1	0		0	0	0	0	0	0	0	0		1	1	1	1	1	1	1	1
EAX86785	TVAG_420660	1	0	-3.13467	0	1	0	1	0		0	0	0	0	0	0	0	0		1	1	1	1	1	1	1	1
EAX88838	TVAG_420770	1	0	-3.13467	0	1	0	1	0		0	0	0	0	0	0	0	0		1	1	1	1	1	1	1	1
EAX77118	TVAG_425340	1	0	-3.13467	0	1	0	1	0		0	0	0	0	0	0	0	0		1	1	1	1	1	1	1	1
EAX78230	TVAG_429030	1	0	-3.13467	0	1	0	1	0		0	0	0	0	0	0	0	0		1	1	1	1	1	1	1	1
EAX67493	TVAG_432080	1	0	-3.13467	0	1	0	1	0		0	0	0	0	0	0	0	0		1	1	1	1	1	1	1	1
EAX85589	TVAG_432110	1	0	-3.13467	0	1	0	1	0		0	0	0	0	0	0	0	0		1	1	1	1	1	1	1	1
EAX84221	TVAG_435700	1	0	-3.13467	0	1	0	1	0		0	0	0	0	0	0	0	0		1	1	1	1	1	1	1	1
EAX80640	TVAG_439590	1	0	-3.13467	0	1	0	1	0		0	0	0	0	0	0	0	0		1	1	1	1	1	1	1	1
EAX89474	TVAG_439960	1	0	-3.13467	0	1	0	1	0		0	0	0	0	0	0	0	0		1	1	1	1	1	1	1	1
EAX79472	TVAG_441910	1	0	-3.13467	0	1	0	1	0		0	0	0	0	0	0	0	0		1	1	1	1	1	1	1	1
EAX79495	TVAG_441980	1	0	-3.13467	0	1	0	1	0		0	0	0	0	0	0	0	0		1	1	1	1	1	1	1	1
EAX79497	TVAG_442000	1	0	-3.13467	0	1	0	1	0		0	0	0	0	0	0	0	0		1	1	1	1	1	1	1	1
EAX84654	TVAG_442830	1	0	-3.13467	0	1	0	1	0		0	0	0	0	0	0	0	0		1	1	1	1	1	1	1	1
EAX84656	TVAG_442850	1	0	-3.13467	0	1	0	1	0		0	0	0	0	0	0	0	0		1	1	1	1	1	1	1	1
EAX86222	TVAG_446450	1	0	-3.13467	0	1	0	1	0		0	0	0	0	0	0	0	0		1	1	1	1	1	1	1	1
EAX86224	TVAG_446470	1	0	-3.13467	0	1	0	1	0		0	0	0	0	0	0	0	0		1	1	1	1	1	1	1	1
EAX86346	TVAG_450040	1	0	-3.13467	0	1	0	1	0		0	0	0	0	0	0	0	0		1	1	1	1	1	1	1	1
EAX87414	TVAG_454890	1	0	-3.13467	0	1	0	1	0		0	0	0	0	0	0	0	0		1	1	1	1	1	1	1	1
EAX86337	TVAG_454980	1	0	-3.13467	0	1	0	1	0		0	0	0	0	0	0	0	0		1	1	1	1	1	1	1	1
EAX74695	TVAG_455380	1	0	-3.13467	0	1	0	1	0		0	0	0	0	0	0	0	0		1	1	1	1	1	1	1	1
EAX90047	TVAG_455860	1	0	-3.13467	0	1	0	1	0		0	0	0	0	0	0	0	0		1	1	1	1	1	1	1	1
EAX86145	TVAG_456080	1	0	-3.13467	0	1	0	1	0		0	0	0	0	0	0	0	0		1	1	1	1	1	1	1	1
EAX88722	TVAG_459680	1	0	-3.13467	0	1	0	1	0		0	0	0	0	0	0	0	0		1	1	1	1	1	1	1	1
EAX88725	TVAG_459700	1	0	-3.13467	0	1	0	1	0		0	0	0	0	0	0	0	0		1	1	1	1	1	1	1	1
EAX87972	TVAG_459870	1	0	-3.13467	0	1	0	1	0		0	0	0	0	0	0	0	0		1	1	1	1	1	1	1	1
EAX71269	TVAG_461320	1	0	-3.13467	0	1	0	1	0		0	0	0	0	0	0	0	0		1	1	1	1	1	1	1	1
EAX74452	TVAG_461650	1	0	-3.13467	0	1	0	1	0		0	0	0	0	0	0	0	0		1	1	1	1	1	1	1	1
EAX79169	TVAG_461670	1	0	-3.13467	0	1	0	1	0		0	0	0	0	0	0	0	0		1	1	1	1	1	1	1	1
EAX76151	TVAG_463610	1	0	-3.13467	0	1	0	1	0		0	0	0	0	0	0	0	0		1	1	1	1	1	1	1	1
EAX86623	TVAG_465590	1	0	-3.13467	0	1	0	1	0		0	0	0	0	0	0	0	0		1	1	1	1	1	1	1	1
EAX86625	TVAG_465610	1	0	-3.13467	0	1	0	1	0		0	0	0	0	0	0	0	0		1	1	1	1	1	1	1	1
EAX85819	TVAG_467450	1	0	-3.13467	0	1	0	1	0		0	0	0	0	0	0	0	0		1	1	1	1	1	1	1	1
EAX83308	TVAG_468890	1	0	-3.13467	0	1	0	1	0		0	0	0	0	0	0	0	0		1	1	1	1	1	1	1	1
EAX88174	TVAG_470350	1	0	-3.13467	0	1	0	1	0		0	0	0	0	0	0	0	0		1	1	1	1	1	1	1	1
EAX73010	TVAG_470810	1	0	-3.13467	0	1	0	1	0		0	0	0	0	0	0	0	0		1	1	1	1	1	1	1	1
EAX85607	TVAG_471200	1	0	-3.13467	0	1	0	1	0		0	0	0	0	0	0	0	0		1	1	1	1	1	1	1	1
EAX67842	TVAG_471470	1	0	-3.13467	0	1	0	1	0		0	0	0	0	0	0	0	0		1	1	1	1	1	1	1	1
EAX76031	TVAG_473210	1	0	-3.13467	0	1	0	1	0		0	0	0	0	0	0	0	0		1	1	1	1	1	1	1	1
EAX85875	TVAG_473550	1	0	-3.13467	0	1	0	1	0		0	0	0	0	0	0	0	0		1	1	1	1	1	1	1	1
EAX75206	TVAG_473720	1	0	-3.13467	0	1	0	1	0		0	0	0	0	0	0	0	0		1	1	1	1	1	1	1	1
EAX85821	TVAG_477920	1	0	-3.13467	0	1	0	1	0		0	0	0	0	0	0	0	0		1	1	1	1	1	1	1	1
EAX82933	TVAG_479080	1	0	-3.13467	0	1	0	1	0		0	0	0	0	0	0	0	0		1	1	1	1	1	1	1	1
EAX85089	TVAG_479470	1	0	-3.13467	0	1	0	1	0		0	0	0	0	0	0	0	0		1	1	1	1	1	1	1	1
EAX76402	TVAG_479960	1	0	-3.13467	0	1	0	1	0		0	0	0	0	0	0	0	0		1	1	1	1	1	1	1	1
EAX84461	TVAG_480030	1	0	-3.13467	0	1	0	1	0		0	0	0	0	0	0	0	0		1	1	1	1	1	1	1	1
EAX85262	TVAG_480280	1	0	-3.13467	0	1	0	1	0		0	0	0	0	0	0	0	0		1	1	1	1	1	1	1	1
EAX83164	TVAG_481200	1	0	-3.13467	0	1	0	1	0		0	0	0	0	0	0	0	0		1	1	1	1	1	1	1	1
EAX74747	TVAG_481450	1	0	-3.13467	0	1	0	1	0		0	0	0	0	0	0	0	0		1	1	1	1	1	1	1	1
EAX70695	TVAG_481470	1	0	-3.13467	0	1	0	1	0		0	0	0	0	0	0	0	0		1	1	1	1	1	1	1	1
EAX82024	TVAG_484720	1	0	-3.13467	0	1	0	1	0		0	0	0	0	0	0	0	0		1	1	1	1	1	1	1	1
EAX78972	TVAG_484840	1	0	-3.13467	0	1	0	1	0		0	0	0	0	0	0	0	0		1	1	1	1	1	1	1	1
EAX82402	TVAG_490540	1	0	-3.13467	0	1	0	1	0		0	0	0	0	0	0	0	0		1	1	1	1	1	1	1	1
EAX72435	TVAG_490640	1	0	-3.13467	0	1	0	1	0		0	0	0	0	0	0	0	0		1	1	1	1	1	1	1	1
EAX69767	TVAG_491430	1	0	-3.13467	0	1	0	1	0		0	0	0	0	0	0	0	0		1	1	1	1	1	1	1	1
EAX75214	TVAG_491990	1	0	-3.13467	0	1	0	1	0		0	0	0	0	0	0	0	0		1	1	1	1	1	1	1	1
EAX76851	TVAG_492010	1	0	-3.13467	0	1	0	1	0		0	0	0	0	0	0	0	0		1	1	1	1	1	1	1	1
EAX85122	TVAG_494610	1	0	-3.13467	0	1	0	1	0		0	0	0	0	0	0	0	0		1	1	1	1	1	1	1	1
EAX85123	TVAG_494620	1	0	-3.13467	0	1	0	1	0		0	0	0	0	0	0	0	0		1	1	1	1	1	1	1	1
EAX81244	TVAG_496420	1	0	-3.13467	0	1	0	1	0		0	0	0	0	0	0	0	0		1	1	1	1	1	1	1	1
EAX81547	TVAG_497510	1	0	-3.13467	0	1	0	1	0		0	0	0	0	0	0	0	0		1	1	1	1	1	1	1	1
EAX75661	TVAG_499190	1	0	-3.13467	0	1	0	1	0		0	0	0	0	0	0	0	0		1	1	1	1	1	1	1	1
EAX69052	TVAG_500130	1	0	-3.13467	0	1	0	1	0		0	0	0	0	0	0	0	0		1	1	1	1	1	1	1	1
EAX70045	TVAG_500160	1	0	-3.13467	0	1	0	1	0		0	0	0	0	0	0	0	0		1	1	1	1	1	1	1	1
EAX66253	TVAG_500390	1	0	-3.13467	0	1	0	1	0		0	0	0	0	0	0	0	0		1	1	1	1	1	1	1	1
EAX73326	TVAG_500770	1	0	-3.13467	0	1	0	1	0		0	0	0	0	0	0	0	0		1	1	1	1	1	1	1	1
EAX80772	TVAG_501660	1	0	-3.13467	0	1	0	1	0		0	0	0	0	0	0	0	0		1	1	1	1	1	1	1	1
EAX68802	TVAG_502240	1	0	-3.13467	0	1	0	1	0		0	0	0	0	0	0	0	0		1	1	1	1	1	1	1	1
EAX67685	TVAG_502300	1	0	-3.13467	0	1	0	1	0		0	0	0	0	0	0	0	0		1	1	1	1	1	1	1	1
EAX69032	TVAG_502880	1	0	-3.13467	0	1	0	1	0		0	0	0	0	0	0	0	0		1	1	1	1	1	1	1	1
EAX68750	TVAG_502940	1	0	-3.13467	0	1	0	1	0		0	0	0	0	0	0	0	0		1	1	1	1	1	1	1	1
EAX74261	TVAG_503230	1	0	-3.13467	0	1	0	1	0		0	0	0	0	0	0	0	0		1	1	1	1	1	1	1	1
EAX75694	TVAG_503420	1	0	-3.13467	0	1	0	1	0		0	0	0	0	0	0	0	0		1	1	1	1	1	1	1	1
EAX69269	TVAG_503460	1	0	-3.13467	0	1	0	1	0		0	0	0	0	0	0	0	0		1	1	1	1	1	1	1	1
EAX80900	TVAG_503680	1	0	-3.13467	0	1	0	1	0		0	0	0	0	0	0	0	0		1	1	1	1	1	1	1	1
EAX66897	TVAG_503760	1	0	-3.13467	0	1	0	1	0		0	0	0	0	0	0	0	0		1	1	1	1	1	1	1	1
EAX66365	TVAG_504330	1	0	-3.13467	0	1	0	1	0		0	0	0	0	0	0	0	0		1	1	1	1	1	1	1	1
EAX66577	TVAG_504680	1	0	-3.13467	0	1	0	1	0		0	0	0	0	0	0	0	0		1	1	1	1	1	1	1	1
EAX71502	TVAG_505820	1	0	-3.13467	0	1	0	1	0		0	0	0	0	0	0	0	0		1	1	1	1	1	1	1	1
EAX81799	TVAG_506030	1	0	-3.13467	0	1	0	1	0		0	0	0	0	0	0	0	0		1	1	1	1	1	1	1	1
EAX67045	TVAG_506540	1	0	-3.13467	0	1	0	1	0		0	0	0	0	0	0	0	0		1	1	1	1	1	1	1	1
EAX77401	TVAG_506790	1	0	-3.13467	0	1	0	1	0		0	0	0	0	0	0	0	0		1	1	1	1	1	1	1	1
EAX68033	TVAG_507910	1	0	-3.13467	0	1	0	1	0		0	0	0	0	0	0	0	0		1	1	1	1	1	1	1	1
EAX67989	TVAG_508260	1	0	-3.13467	0	1	0	1	0		0	0	0	0	0	0	0	0		1	1	1	1	1	1	1	1
EAX66633	TVAG_508380	1	0	-3.13467	0	1	0	1	0		0	0	0	0	0	0	0	0		1	1	1	1	1	1	1	1
EAX69266	TVAG_508620	1	0	-3.13467	0	1	0	1	0		0	0	0	0	0	0	0	0		1	1	1	1	1	1	1	1
EAX80686	TVAG_508980	1	0	-3.13467	0	1	0	1	0		0	0	0	0	0	0	0	0		1	1	1	1	1	1	1	1
EAX71202	TVAG_509340	1	0	-3.13467	0	1	0	1	0		0	0	0	0	0	0	0	0		1	1	1	1	1	1	1	1
EAX67978	TVAG_509850	1	0	-3.13467	0	1	0	1	0		0	0	0	0	0	0	0	0		1	1	1	1	1	1	1	1
EAX71942	TVAG_509870	1	0	-3.13467	0	1	0	1	0		0	0	0	0	0	0	0	0		1	1	1	1	1	1	1	1
EAX70249	TVAG_510000	1	0	-3.13467	0	1	0	1	0		0	0	0	0	0	0	0	0		1	1	1	1	1	1	1	1
EAX68622	TVAG_510110	1	0	-3.13467	0	1	0	1	0		0	0	0	0	0	0	0	0		1	1	1	1	1	1	1	1
EAX72266	TVAG_510230	1	0	-3.13467	0	1	0	1	0		0	0	0	0	0	0	0	0		1	1	1	1	1	1	1	1
EAX71953	TVAG_511020	1	0	-3.13467	0	1	0	1	0		0	0	0	0	0	0	0	0		1	1	1	1	1	1	1	1
EAX77810	TVAG_511280	1	0	-3.13467	0	1	0	1	0		0	0	0	0	0	0	0	0		1	1	1	1	1	1	1	1
EAX68298	TVAG_511460	1	0	-3.13467	0	1	0	1	0		0	0	0	0	0	0	0	0		1	1	1	1	1	1	1	1
EAX68300	TVAG_511480	1	0	-3.13467	0	1	0	1	0		0	0	0	0	0	0	0	0		1	1	1	1	1	1	1	1
EAX82437	TVAG_511970	1	0	-3.13467	0	1	0	1	0		0	0	0	0	0	0	0	0		1	1	1	1	1	1	1	1
EAX69296	TVAG_513240	1	0	-3.13467	0	1	0	1	0		0	0	0	0	0	0	0	0		1	1	1	1	1	1	1	1
EAX71679	TVAG_513410	1	0	-3.13467	0	1	0	1	0		0	0	0	0	0	0	0	0		1	1	1	1	1	1	1	1
EAX72297	TVAG_513560	1	0	-3.13467	0	1	0	1	0		0	0	0	0	0	0	0	0		1	1	1	1	1	1	1	1
EAX74202	TVAG_514070	1	0	-3.13467	0	1	0	1	0		0	0	0	0	0	0	0	0		1	1	1	1	1	1	1	1
EAX75985	TVAG_515260	1	0	-3.13467	0	1	0	1	0		0	0	0	0	0	0	0	0		1	1	1	1	1	1	1	1
EAX67547	TVAG_515360	1	0	-3.13467	0	1	0	1	0		0	0	0	0	0	0	0	0		1	1	1	1	1	1	1	1
EAX71850	TVAG_515440	1	0	-3.13467	0	1	0	1	0		0	0	0	0	0	0	0	0		1	1	1	1	1	1	1	1
EAX73992	TVAG_515500	1	0	-3.13467	0	1	0	1	0		0	0	0	0	0	0	0	0		1	1	1	1	1	1	1	1
EAX73993	TVAG_515510	1	0	-3.13467	0	1	0	1	0		0	0	0	0	0	0	0	0		1	1	1	1	1	1	1	1
EAX66554	TVAG_515930	1	0	-3.13467	0	1	0	1	0		0	0	0	0	0	0	0	0		1	1	1	1	1	1	1	1
EAX72779	TVAG_516370	1	0	-3.13467	0	1	0	1	0		0	0	0	0	0	0	0	0		1	1	1	1	1	1	1	1
EAX70209	TVAG_517060	1	0	-3.13467	0	1	0	1	0		0	0	0	0	0	0	0	0		1	1	1	1	1	1	1	1
EAX80471	TVAG_518620	1	0	-3.13467	0	1	0	1	0		0	0	0	0	0	0	0	0		1	1	1	1	1	1	1	1
EAX80472	TVAG_518640	1	0	-3.13467	0	1	0	1	0		0	0	0	0	0	0	0	0		1	1	1	1	1	1	1	1
EAX68707	TVAG_519300	1	0	-3.13467	0	1	0	1	0		0	0	0	0	0	0	0	0		1	1	1	1	1	1	1	1
EAX80081	TVAG_520000	1	0	-3.13467	0	1	0	1	0		0	0	0	0	0	0	0	0		1	1	1	1	1	1	1	1
EAX74007	TVAG_520670	1	0	-3.13467	0	1	0	1	0		0	0	0	0	0	0	0	0		1	1	1	1	1	1	1	1
EAX71783	TVAG_521490	1	0	-3.13467	0	1	0	1	0		0	0	0	0	0	0	0	0		1	1	1	1	1	1	1	1
EAX71786	TVAG_521510	1	0	-3.13467	0	1	0	1	0		0	0	0	0	0	0	0	0		1	1	1	1	1	1	1	1
EAX68313	TVAG_521840	1	0	-3.13467	0	1	0	1	0		0	0	0	0	0	0	0	0		1	1	1	1	1	1	1	1
EAX66933	TVAG_522010	1	0	-3.13467	0	1	0	1	0		0	0	0	0	0	0	0	0		1	1	1	1	1	1	1	1
EAX70420	TVAG_522020	1	0	-3.13467	0	1	0	1	0		0	0	0	0	0	0	0	0		1	1	1	1	1	1	1	1
EAX68149	TVAG_522330	1	0	-3.13467	0	1	0	1	0		0	0	0	0	0	0	0	0		1	1	1	1	1	1	1	1
EAX68151	TVAG_522350	1	0	-3.13467	0	1	0	1	0		0	0	0	0	0	0	0	0		1	1	1	1	1	1	1	1
EAX66950	TVAG_522500	1	0	-3.13467	0	1	0	1	0		0	0	0	0	0	0	0	0		1	1	1	1	1	1	1	1
EAX74799	TVAG_522840	1	0	-3.13467	0	1	0	1	0		0	0	0	0	0	0	0	0		1	1	1	1	1	1	1	1
EAX74801	TVAG_522860	1	0	-3.13467	0	1	0	1	0		0	0	0	0	0	0	0	0		1	1	1	1	1	1	1	1
EAX68103	TVAG_523040	1	0	-3.13467	0	1	0	1	0		0	0	0	0	0	0	0	0		1	1	1	1	1	1	1	1
EAX72415	TVAG_523160	1	0	-3.13467	0	1	0	1	0		0	0	0	0	0	0	0	0		1	1	1	1	1	1	1	1
EAX80847	TVAG_523560	1	0	-3.13467	0	1	0	1	0		0	0	0	0	0	0	0	0		1	1	1	1	1	1	1	1
EAX65248	TVAG_523920	1	0	-3.13467	0	1	0	1	0		0	0	0	0	0	0	0	0		1	1	1	1	1	1	1	1
EAX70943	TVAG_524890	1	0	-3.13467	0	1	0	1	0		0	0	0	0	0	0	0	0		1	1	1	1	1	1	1	1
EAX68203	TVAG_524920	1	0	-3.13467	0	1	0	1	0		0	0	0	0	0	0	0	0		1	1	1	1	1	1	1	1
EAX70949	TVAG_525010	1	0	-3.13467	0	1	0	1	0		0	0	0	0	0	0	0	0		1	1	1	1	1	1	1	1
EAX75614	TVAG_528380	1	0	-3.13467	0	1	0	1	0		0	0	0	0	0	0	0	0		1	1	1	1	1	1	1	1
EAX74536	TVAG_529230	1	0	-3.13467	0	1	0	1	0		0	0	0	0	0	0	0	0		1	1	1	1	1	1	1	1
EAX74538	TVAG_529250	1	0	-3.13467	0	1	0	1	0		0	0	0	0	0	0	0	0		1	1	1	1	1	1	1	1
EAX68376	TVAG_529660	1	0	-3.13467	0	1	0	1	0		0	0	0	0	0	0	0	0		1	1	1	1	1	1	1	1
EAX68676	TVAG_531020	1	0	-3.13467	0	1	0	1	0		0	0	0	0	0	0	0	0		1	1	1	1	1	1	1	1
EAX73967	TVAG_531200	1	0	-3.13467	0	1	0	1	0		0	0	0	0	0	0	0	0		1	1	1	1	1	1	1	1
EAX74836	TVAG_531280	1	0	-3.13467	0	1	0	1	0		0	0	0	0	0	0	0	0		1	1	1	1	1	1	1	1
EAX70245	TVAG_531460	1	0	-3.13467	0	1	0	1	0		0	0	0	0	0	0	0	0		1	1	1	1	1	1	1	1
EAX75084	TVAG_531880	1	0	-3.13467	0	1	0	1	0		0	0	0	0	0	0	0	0		1	1	1	1	1	1	1	1
EAX72090	TVAG_532350	1	0	-3.13467	0	1	0	1	0		0	0	0	0	0	0	0	0		1	1	1	1	1	1	1	1
EAX78543	TVAG_532500	1	0	-3.13467	0	1	0	1	0		0	0	0	0	0	0	0	0		1	1	1	1	1	1	1	1
EAX66265	TVAG_533240	1	0	-3.13467	0	1	0	1	0		0	0	0	0	0	0	0	0		1	1	1	1	1	1	1	1
EAX76751	TVAG_533260	1	0	-3.13467	0	1	0	1	0		0	0	0	0	0	0	0	0		1	1	1	1	1	1	1	1
EAX80013	TVAG_533800	1	0	-3.13467	0	1	0	1	0		0	0	0	0	0	0	0	0		1	1	1	1	1	1	1	1
EAX80933	TVAG_533820	1	0	-3.13467	0	1	0	1	0		0	0	0	0	0	0	0	0		1	1	1	1	1	1	1	1
EAX80935	TVAG_533840	1	0	-3.13467	0	1	0	1	0		0	0	0	0	0	0	0	0		1	1	1	1	1	1	1	1
EAX69752	TVAG_534260	1	0	-3.13467	0	1	0	1	0		0	0	0	0	0	0	0	0		1	1	1	1	1	1	1	1
EAX64161	TVAG_534320	1	0	-3.13467	0	1	0	1	0		0	0	0	0	0	0	0	0		1	1	1	1	1	1	1	1
EAX66694	TVAG_534650	1	0	-3.13467	0	1	0	1	0		0	0	0	0	0	0	0	0		1	1	1	1	1	1	1	1
EAX68393	TVAG_534770	1	0	-3.13467	0	1	0	1	0		0	0	0	0	0	0	0	0		1	1	1	1	1	1	1	1
EAX81646	TVAG_535100	1	0	-3.13467	0	1	0	1	0		0	0	0	0	0	0	0	0		1	1	1	1	1	1	1	1
EAX68216	TVAG_535170	1	0	-3.13467	0	1	0	1	0		0	0	0	0	0	0	0	0		1	1	1	1	1	1	1	1
EAX77273	TVAG_535700	1	0	-3.13467	0	1	0	1	0		0	0	0	0	0	0	0	0		1	1	1	1	1	1	1	1
EAX72495	TVAG_535790	1	0	-3.13467	0	1	0	1	0		0	0	0	0	0	0	0	0		1	1	1	1	1	1	1	1
EAX70379	TVAG_535850	1	0	-3.13467	0	1	0	1	0		0	0	0	0	0	0	0	0		1	1	1	1	1	1	1	1
EAX73086	TVAG_535990	1	0	-3.13467	0	1	0	1	0		0	0	0	0	0	0	0	0		1	1	1	1	1	1	1	1
EAX73657	TVAG_536120	1	0	-3.13467	0	1	0	1	0		0	0	0	0	0	0	0	0		1	1	1	1	1	1	1	1
EAX73659	TVAG_536140	1	0	-3.13467	0	1	0	1	0		0	0	0	0	0	0	0	0		1	1	1	1	1	1	1	1
EAX80944	TVAG_536320	1	0	-3.13467	0	1	0	1	0		0	0	0	0	0	0	0	0		1	1	1	1	1	1	1	1
EAX80946	TVAG_536340	1	0	-3.13467	0	1	0	1	0		0	0	0	0	0	0	0	0		1	1	1	1	1	1	1	1
EAX71586	TVAG_536710	1	0	-3.13467	0	1	0	1	0		0	0	0	0	0	0	0	0		1	1	1	1	1	1	1	1
EAX68769	TVAG_537560	1	0	-3.13467	0	1	0	1	0		0	0	0	0	0	0	0	0		1	1	1	1	1	1	1	1
EAX67347	TVAG_537880	1	0	-3.13467	0	1	0	1	0		0	0	0	0	0	0	0	0		1	1	1	1	1	1	1	1
EAX66410	TVAG_538460	1	0	-3.13467	0	1	0	1	0		0	0	0	0	0	0	0	0		1	1	1	1	1	1	1	1
EAX68916	TVAG_538550	1	0	-3.13467	0	1	0	1	0		0	0	0	0	0	0	0	0		1	1	1	1	1	1	1	1
EAX76714	TVAG_538640	1	0	-3.13467	0	1	0	1	0		0	0	0	0	0	0	0	0		1	1	1	1	1	1	1	1
EAX71315	TVAG_539890	1	0	-3.13467	0	1	0	1	0		0	0	0	0	0	0	0	0		1	1	1	1	1	1	1	1
EAX78179	TVAG_539920	1	0	-3.13467	0	1	0	1	0		0	0	0	0	0	0	0	0		1	1	1	1	1	1	1	1
EAX68625	TVAG_540080	1	0	-3.13467	0	1	0	1	0		0	0	0	0	0	0	0	0		1	1	1	1	1	1	1	1
EAX68780	TVAG_540800	1	0	-3.13467	0	1	0	1	0		0	0	0	0	0	0	0	0		1	1	1	1	1	1	1	1
EAX68586	TVAG_542130	1	0	-3.13467	0	1	0	1	0		0	0	0	0	0	0	0	0		1	1	1	1	1	1	1	1
EAX70844	TVAG_543370	1	0	-3.13467	0	1	0	1	0		0	0	0	0	0	0	0	0		1	1	1	1	1	1	1	1
EAX69315	TVAG_543640	1	0	-3.13467	0	1	0	1	0		0	0	0	0	0	0	0	0		1	1	1	1	1	1	1	1
EAX80335	TVAG_543920	1	0	-3.13467	0	1	0	1	0		0	0	0	0	0	0	0	0		1	1	1	1	1	1	1	1
EAX67659	TVAG_543990	1	0	-3.13467	0	1	0	1	0		0	0	0	0	0	0	0	0		1	1	1	1	1	1	1	1
EAX81687	TVAG_544220	1	0	-3.13467	0	1	0	1	0		0	0	0	0	0	0	0	0		1	1	1	1	1	1	1	1
EAX72227	TVAG_544820	1	0	-3.13467	0	1	0	1	0		0	0	0	0	0	0	0	0		1	1	1	1	1	1	1	1
EAX69660	TVAG_545040	1	0	-3.13467	0	1	0	1	0		0	0	0	0	0	0	0	0		1	1	1	1	1	1	1	1
EAX68465	TVAG_545760	1	0	-3.13467	0	1	0	1	0		0	0	0	0	0	0	0	0		1	1	1	1	1	1	1	1
EAX69869	TVAG_546310	1	0	-3.13467	0	1	0	1	0		0	0	0	0	0	0	0	0		1	1	1	1	1	1	1	1
EAX72962	TVAG_546360	1	0	-3.13467	0	1	0	1	0		0	0	0	0	0	0	0	0		1	1	1	1	1	1	1	1
EAX72705	TVAG_547010	1	0	-3.13467	0	1	0	1	0		0	0	0	0	0	0	0	0		1	1	1	1	1	1	1	1
EAX73014	TVAG_548100	1	0	-3.13467	0	1	0	1	0		0	0	0	0	0	0	0	0		1	1	1	1	1	1	1	1
EAX70758	TVAG_548730	1	0	-3.13467	0	1	0	1	0		0	0	0	0	0	0	0	0		1	1	1	1	1	1	1	1
EAX82265	TVAG_549190	1	0	-3.13467	0	1	0	1	0		0	0	0	0	0	0	0	0		1	1	1	1	1	1	1	1
EAX69043	TVAG_549370	1	0	-3.13467	0	1	0	1	0		0	0	0	0	0	0	0	0		1	1	1	1	1	1	1	1
EAX70327	TVAG_550130	1	0	-3.13467	0	1	0	1	0		0	0	0	0	0	0	0	0		1	1	1	1	1	1	1	1
EAX69785	TVAG_550220	1	0	-3.13467	0	1	0	1	0		0	0	0	0	0	0	0	0		1	1	1	1	1	1	1	1
EAX66250	TVAG_550420	1	0	-3.13467	0	1	0	1	0		0	0	0	0	0	0	0	0		1	1	1	1	1	1	1	1
EAX72447	TVAG_551990	1	0	-3.13467	0	1	0	1	0		0	0	0	0	0	0	0	0		1	1	1	1	1	1	1	1
EAX76557	TVAG_552300	1	0	-3.13467	0	1	0	1	0		0	0	0	0	0	0	0	0		1	1	1	1	1	1	1	1
EAX68009	TVAG_552630	1	0	-3.13467	0	1	0	1	0		0	0	0	0	0	0	0	0		1	1	1	1	1	1	1	1
EAX69741	TVAG_552770	1	0	-3.13467	0	1	0	1	0		0	0	0	0	0	0	0	0		1	1	1	1	1	1	1	1
EAX68529	TVAG_553260	1	0	-3.13467	0	1	0	1	0		0	0	0	0	0	0	0	0		1	1	1	1	1	1	1	1
EAX71301	TVAG_553750	1	0	-3.13467	0	1	0	1	0		0	0	0	0	0	0	0	0		1	1	1	1	1	1	1	1
EAX78642	TVAG_554940	1	0	-3.13467	0	1	0	1	0		0	0	0	0	0	0	0	0		1	1	1	1	1	1	1	1
EAX75712	TVAG_555100	1	0	-3.13467	0	1	0	1	0		0	0	0	0	0	0	0	0		1	1	1	1	1	1	1	1
EAX67836	TVAG_555760	1	0	-3.13467	0	1	0	1	0		0	0	0	0	0	0	0	0		1	1	1	1	1	1	1	1
EAX66392	TVAG_556070	1	0	-3.13467	0	1	0	1	0		0	0	0	0	0	0	0	0		1	1	1	1	1	1	1	1
EAX69578	TVAG_556170	1	0	-3.13467	0	1	0	1	0		0	0	0	0	0	0	0	0		1	1	1	1	1	1	1	1
EAX66457	TVAG_556710	1	0	-3.13467	0	1	0	1	0		0	0	0	0	0	0	0	0		1	1	1	1	1	1	1	1
EAX67677	TVAG_556730	1	0	-3.13467	0	1	0	1	0		0	0	0	0	0	0	0	0		1	1	1	1	1	1	1	1
EAX81734	TVAG_557380	1	0	-3.13467	0	1	0	1	0		0	0	0	0	0	0	0	0		1	1	1	1	1	1	1	1
EAX73139	TVAG_557540	1	0	-3.13467	0	1	0	1	0		0	0	0	0	0	0	0	0		1	1	1	1	1	1	1	1
EAX78016	TVAG_558470	1	0	-3.13467	0	1	0	1	0		0	0	0	0	0	0	0	0		1	1	1	1	1	1	1	1
EAX79489	TVAG_559010	1	0	-3.13467	0	1	0	1	0		0	0	0	0	0	0	0	0		1	1	1	1	1	1	1	1
EAX68958	TVAG_560370	1	0	-3.13467	0	1	0	1	0		0	0	0	0	0	0	0	0		1	1	1	1	1	1	1	1
EAX72513	TVAG_560390	1	0	-3.13467	0	1	0	1	0		0	0	0	0	0	0	0	0		1	1	1	1	1	1	1	1
EAX72517	TVAG_560410	1	0	-3.13467	0	1	0	1	0		0	0	0	0	0	0	0	0		1	1	1	1	1	1	1	1
EAX75307	TVAG_561360	1	0	-3.13467	0	1	0	1	0		0	0	0	0	0	0	0	0		1	1	1	1	1	1	1	1
EAX69316	TVAG_561650	1	0	-3.13467	0	1	0	1	0		0	0	0	0	0	0	0	0		1	1	1	1	1	1	1	1
EAX75707	TVAG_562060	1	0	-3.13467	0	1	0	1	0		0	0	0	0	0	0	0	0		1	1	1	1	1	1	1	1
EAX73196	TVAG_562100	1	0	-3.13467	0	1	0	1	0		0	0	0	0	0	0	0	0		1	1	1	1	1	1	1	1
EAX71688	TVAG_562140	1	0	-3.13467	0	1	0	1	0		0	0	0	0	0	0	0	0		1	1	1	1	1	1	1	1
EAX66224	TVAG_562600	1	0	-3.13467	0	1	0	1	0		0	0	0	0	0	0	0	0		1	1	1	1	1	1	1	1
EAX67364	TVAG_563590	1	0	-3.13467	0	1	0	1	0		0	0	0	0	0	0	0	0		1	1	1	1	1	1	1	1
EAX66664	TVAG_564380	1	0	-3.13467	0	1	0	1	0		0	0	0	0	0	0	0	0		1	1	1	1	1	1	1	1
EAX70514	TVAG_564500	1	0	-3.13467	0	1	0	1	0		0	0	0	0	0	0	0	0		1	1	1	1	1	1	1	1
EAX73358	TVAG_564570	1	0	-3.13467	0	1	0	1	0		0	0	0	0	0	0	0	0		1	1	1	1	1	1	1	1
EAX66734	TVAG_565130	1	0	-3.13467	0	1	0	1	0		0	0	0	0	0	0	0	0		1	1	1	1	1	1	1	1
EAX77708	TVAG_565660	1	0	-3.13467	0	1	0	1	0		0	0	0	0	0	0	0	0		1	1	1	1	1	1	1	1
EAX70109	TVAG_566050	1	0	-3.13467	0	1	0	1	0		0	0	0	0	0	0	0	0		1	1	1	1	1	1	1	1
EAX81553	TVAG_566800	1	0	-3.13467	0	1	0	1	0		0	0	0	0	0	0	0	0		1	1	1	1	1	1	1	1
EAX70990	TVAG_566940	1	0	-3.13467	0	1	0	1	0		0	0	0	0	0	0	0	0		1	1	1	1	1	1	1	1
EAX66974	TVAG_566960	1	0	-3.13467	0	1	0	1	0		0	0	0	0	0	0	0	0		1	1	1	1	1	1	1	1
EAX70166	TVAG_567020	1	0	-3.13467	0	1	0	1	0		0	0	0	0	0	0	0	0		1	1	1	1	1	1	1	1
EAX82147	TVAG_567440	1	0	-3.13467	0	1	0	1	0		0	0	0	0	0	0	0	0		1	1	1	1	1	1	1	1
EAX70953	TVAG_568240	1	0	-3.13467	0	1	0	1	0		0	0	0	0	0	0	0	0		1	1	1	1	1	1	1	1
EAX68798	TVAG_569010	1	0	-3.13467	0	1	0	1	0		0	0	0	0	0	0	0	0		1	1	1	1	1	1	1	1
EAX66211	TVAG_569130	1	0	-3.13467	0	1	0	1	0		0	0	0	0	0	0	0	0		1	1	1	1	1	1	1	1
EAX77079	TVAG_569360	1	0	-3.13467	0	1	0	1	0		0	0	0	0	0	0	0	0		1	1	1	1	1	1	1	1
EAX77081	TVAG_569380	1	0	-3.13467	0	1	0	1	0		0	0	0	0	0	0	0	0		1	1	1	1	1	1	1	1
EAX69547	TVAG_569620	1	0	-3.13467	0	1	0	1	0		0	0	0	0	0	0	0	0		1	1	1	1	1	1	1	1
EAX69514	TVAG_569640	1	0	-3.13467	0	1	0	1	0		0	0	0	0	0	0	0	0		1	1	1	1	1	1	1	1
EAX66621	TVAG_569880	1	0	-3.13467	0	1	0	1	0		0	0	0	0	0	0	0	0		1	1	1	1	1	1	1	1
EAX70015	TVAG_570150	1	0	-3.13467	0	1	0	1	0		0	0	0	0	0	0	0	0		1	1	1	1	1	1	1	1
EAX78615	TVAG_570210	1	0	-3.13467	0	1	0	1	0		0	0	0	0	0	0	0	0		1	1	1	1	1	1	1	1
EAX71370	TVAG_570310	1	0	-3.13467	0	1	0	1	0		0	0	0	0	0	0	0	0		1	1	1	1	1	1	1	1
EAX69950	TVAG_570480	1	0	-3.13467	0	1	0	1	0		0	0	0	0	0	0	0	0		1	1	1	1	1	1	1	1
EAX83064	TVAG_573000	1	0	-3.13467	0	1	0	1	0		0	0	0	0	0	0	0	0		1	1	1	1	1	1	1	1
EAX83066	TVAG_573010	1	0	-3.13467	0	1	0	1	0		0	0	0	0	0	0	0	0		1	1	1	1	1	1	1	1
EAX66529	TVAG_573260	1	0	-3.13467	0	1	0	1	0		0	0	0	0	0	0	0	0		1	1	1	1	1	1	1	1
EAX67696	TVAG_573450	1	0	-3.13467	0	1	0	1	0		0	0	0	0	0	0	0	0		1	1	1	1	1	1	1	1
EAX66648	TVAG_574200	1	0	-3.13467	0	1	0	1	0		0	0	0	0	0	0	0	0		1	1	1	1	1	1	1	1
EAX66586	TVAG_574620	1	0	-3.13467	0	1	0	1	0		0	0	0	0	0	0	0	0		1	1	1	1	1	1	1	1
EAX71225	TVAG_574930	1	0	-3.13467	0	1	0	1	0		0	0	0	0	0	0	0	0		1	1	1	1	1	1	1	1
EAX76184	TVAG_575000	1	0	-3.13467	0	1	0	1	0		0	0	0	0	0	0	0	0		1	1	1	1	1	1	1	1
EAX80451	TVAG_575840	1	0	-3.13467	0	1	0	1	0		0	0	0	0	0	0	0	0		1	1	1	1	1	1	1	1
EAX80454	TVAG_575860	1	0	-3.13467	0	1	0	1	0		0	0	0	0	0	0	0	0		1	1	1	1	1	1	1	1
EAX79060	TVAG_576050	1	0	-3.13467	0	1	0	1	0		0	0	0	0	0	0	0	0		1	1	1	1	1	1	1	1
EAX67606	TVAG_576230	1	0	-3.13467	0	1	0	1	0		0	0	0	0	0	0	0	0		1	1	1	1	1	1	1	1
EAX71731	TVAG_576830	1	0	-3.13467	0	1	0	1	0		0	0	0	0	0	0	0	0		1	1	1	1	1	1	1	1
EAX74058	TVAG_578220	1	0	-3.13467	0	1	0	1	0		0	0	0	0	0	0	0	0		1	1	1	1	1	1	1	1
EAX80602	TVAG_579520	1	0	-3.13467	0	1	0	1	0		0	0	0	0	0	0	0	0		1	1	1	1	1	1	1	1
EAX71042	TVAG_579750	1	0	-3.13467	0	1	0	1	0		0	0	0	0	0	0	0	0		1	1	1	1	1	1	1	1
EAX79269	TVAG_579990	1	0	-3.13467	0	1	0	1	0		0	0	0	0	0	0	0	0		1	1	1	1	1	1	1	1
EAX72701	TVAG_580080	1	0	-3.13467	0	1	0	1	0		0	0	0	0	0	0	0	0		1	1	1	1	1	1	1	1
EAX72703	TVAG_580100	1	0	-3.13467	0	1	0	1	0		0	0	0	0	0	0	0	0		1	1	1	1	1	1	1	1
EAX72546	TVAG_580270	1	0	-3.13467	0	1	0	1	0		0	0	0	0	0	0	0	0		1	1	1	1	1	1	1	1
EAX81800	TVAG_581180	1	0	-3.13467	0	1	0	1	0		0	0	0	0	0	0	0	0		1	1	1	1	1	1	1	1
EAX68341	TVAG_581310	1	0	-3.13467	0	1	0	1	0		0	0	0	0	0	0	0	0		1	1	1	1	1	1	1	1
EAX71501	TVAG_584580	1	0	-3.13467	0	1	0	1	0		0	0	0	0	0	0	0	0		1	1	1	1	1	1	1	1
EAX70787	TVAG_585020	1	0	-3.13467	0	1	0	1	0		0	0	0	0	0	0	0	0		1	1	1	1	1	1	1	1
EAX79818	TVAG_585740	1	0	-3.13467	0	1	0	1	0		0	0	0	0	0	0	0	0		1	1	1	1	1	1	1	1
EAX76196	TVAG_586770	1	0	-3.13467	0	1	0	1	0		0	0	0	0	0	0	0	0		1	1	1	1	1	1	1	1
EAX68438	TVAG_588560	1	0	-3.13467	0	1	0	1	0		0	0	0	0	0	0	0	0		1	1	1	1	1	1	1	1
EAX72886	TVAG_589020	1	0	-3.13467	0	1	0	1	0		0	0	0	0	0	0	0	0		1	1	1	1	1	1	1	1
EAX71051	TVAG_589220	1	0	-3.13467	0	1	0	1	0		0	0	0	0	0	0	0	0		1	1	1	1	1	1	1	1
EAX68865	TVAG_590380	1	0	-3.13467	0	1	0	1	0		0	0	0	0	0	0	0	0		1	1	1	1	1	1	1	1
EAX78599	TVAG_590410	1	0	-3.13467	0	1	0	1	0		0	0	0	0	0	0	0	0		1	1	1	1	1	1	1	1
EAX66837	TVAG_590640	1	0	-3.13467	0	1	0	1	0		0	0	0	0	0	0	0	0		1	1	1	1	1	1	1	1
EAX66838	TVAG_590650	1	0	-3.13467	0	1	0	1	0		0	0	0	0	0	0	0	0		1	1	1	1	1	1	1	1
EAX69795	TVAG_590800	1	0	-3.13467	0	1	0	1	0		0	0	0	0	0	0	0	0		1	1	1	1	1	1	1	1
EAX72902	TVAG_592230	1	0	-3.13467	0	1	0	1	0		0	0	0	0	0	0	0	0		1	1	1	1	1	1	1	1
EAX70657	TVAG_592660	1	0	-3.13467	0	1	0	1	0		0	0	0	0	0	0	0	0		1	1	1	1	1	1	1	1
EAX81189	TVAG_592700	1	0	-3.13467	0	1	0	1	0		0	0	0	0	0	0	0	0		1	1	1	1	1	1	1	1
EAX72430	TVAG_592890	1	0	-3.13467	0	1	0	1	0		0	0	0	0	0	0	0	0		1	1	1	1	1	1	1	1
EAX69643	TVAG_593190	1	0	-3.13467	0	1	0	1	0		0	0	0	0	0	0	0	0		1	1	1	1	1	1	1	1
EAX68947	TVAG_593630	1	0	-3.13467	0	1	0	1	0		0	0	0	0	0	0	0	0		1	1	1	1	1	1	1	1
EAX71258	TVAG_593920	1	0	-3.13467	0	1	0	1	0		0	0	0	0	0	0	0	0		1	1	1	1	1	1	1	1
EAX66339	TVAG_594890	1	0	-3.13467	0	1	0	1	0		0	0	0	0	0	0	0	0		1	1	1	1	1	1	1	1
EAX69366	TVAG_594920	1	0	-3.13467	0	1	0	1	0		0	0	0	0	0	0	0	0		1	1	1	1	1	1	1	1
EAX75785	TVAG_595580	1	0	-3.13467	0	1	0	1	0		0	0	0	0	0	0	0	0		1	1	1	1	1	1	1	1
EAX73204	TVAG_595890	1	0	-3.13467	0	1	0	1	0		0	0	0	0	0	0	0	0		1	1	1	1	1	1	1	1
EAX80941	TVAG_596340	1	0	-3.13467	0	1	0	1	0		0	0	0	0	0	0	0	0		1	1	1	1	1	1	1	1
EAX66808	TVAG_596580	1	0	-3.13467	0	1	0	1	0		0	0	0	0	0	0	0	0		1	1	1	1	1	1	1	1
EAX82868	TVAG_597740	1	0	-3.13467	0	1	0	1	0		0	0	0	0	0	0	0	0		1	1	1	1	1	1	1	1
EAX66537	TVAG_598580	1	0	-3.13467	0	1	0	1	0		0	0	0	0	0	0	0	0		1	1	1	1	1	1	1	1
EAX76952	TVAG_598780	1	0	-3.13467	0	1	0	1	0		0	0	0	0	0	0	0	0		1	1	1	1	1	1	1	1
EAX68267	TVAG_598900	1	0	-3.13467	0	1	0	1	0		0	0	0	0	0	0	0	0		1	1	1	1	1	1	1	1
EAX68105	TVAG_599850	1	0	-3.13467	0	1	0	1	0		0	0	0	0	0	0	0	0		1	1	1	1	1	1	1	1
EAX73082	TVAG_600010	1	0	-3.13467	0	1	0	1	0		0	0	0	0	0	0	0	0		1	1	1	1	1	1	1	1
EAX70597	TVAG_601020	1	0	-3.13467	0	1	0	1	0		0	0	0	0	0	0	0	0		1	1	1	1	1	1	1	1
EAX77835	TVAG_601360	1	0	-3.13467	0	1	0	1	0		0	0	0	0	0	0	0	0		1	1	1	1	1	1	1	1
EAX81499	TVAG_601780	1	0	-3.13467	0	1	0	1	0		0	0	0	0	0	0	0	0		1	1	1	1	1	1	1	1
EAX67944	TVAG_602340	1	0	-3.13467	0	1	0	1	0		0	0	0	0	0	0	0	0		1	1	1	1	1	1	1	1
EAX69693	TVAG_602360	1	0	-3.13467	0	1	0	1	0		0	0	0	0	0	0	0	0		1	1	1	1	1	1	1	1
EAX81910	TVAG_603500	1	0	-3.13467	0	1	0	1	0		0	0	0	0	0	0	0	0		1	1	1	1	1	1	1	1
EAX74175	TVAG_604060	1	0	-3.13467	0	1	0	1	0		0	0	0	0	0	0	0	0		1	1	1	1	1	1	1	1
EAX66085	TVAG_604260	1	0	-3.13467	0	1	0	1	0		0	0	0	0	0	0	0	0		1	1	1	1	1	1	1	1
EAX70607	TVAG_604460	1	0	-3.13467	0	1	0	1	0		0	0	0	0	0	0	0	0		1	1	1	1	1	1	1	1
EAX66421	TVAG_605160	1	0	-3.13467	0	1	0	1	0		0	0	0	0	0	0	0	0		1	1	1	1	1	1	1	1
EAX75916	TVAG_606430	1	0	-3.13467	0	1	0	1	0		0	0	0	0	0	0	0	0		1	1	1	1	1	1	1	1
EAX66268	TVAG_606530	1	0	-3.13467	0	1	0	1	0		0	0	0	0	0	0	0	0		1	1	1	1	1	1	1	1
EAX66562	TVAG_606600	1	0	-3.13467	0	1	0	1	0		0	0	0	0	0	0	0	0		1	1	1	1	1	1	1	1
EAX67141	TVAG_606690	1	0	-3.13467	0	1	0	1	0		0	0	0	0	0	0	0	0		1	1	1	1	1	1	1	1
EAX73052	TVAG_607080	1	0	-3.13467	0	1	0	1	0		0	0	0	0	0	0	0	0		1	1	1	1	1	1	1	1
EAX72913	TVAG_607350	1	0	-3.13467	0	1	0	1	0		0	0	0	0	0	0	0	0		1	1	1	1	1	1	1	1
EAX72915	TVAG_607370	1	0	-3.13467	0	1	0	1	0		0	0	0	0	0	0	0	0		1	1	1	1	1	1	1	1
EAX75235	TVAG_000020	1	0	-3.13467	0	1	0	1	0		0	0	0	0	0	0	0	0		1	1	1	1	1	1	1	1
EAX69428	TVAG_000030	1	0	-3.13467	0	1	0	1	0		0	0	0	0	0	0	0	0		1	1	1	1	1	1	1	1
EAX66630	TVAG_000320	1	0	-3.13467	0	1	0	1	0		0	0	0	0	0	0	0	0		1	1	1	1	1	1	1	1
EAX70769	TVAG_000340	1	0	-3.13467	0	1	0	1	0		0	0	0	0	0	0	0	0		1	1	1	1	1	1	1	1
EAX80504	TVAG_000920	1	0	-3.13467	0	1	0	1	0		0	0	0	0	0	0	0	0		1	1	1	1	1	1	1	1
EAX81874	TVAG_000930	1	0	-3.13467	0	1	0	1	0		0	0	0	0	0	0	0	0		1	1	1	1	1	1	1	1
EAX81876	TVAG_000940	1	0	-3.13467	0	1	0	1	0		0	0	0	0	0	0	0	0		1	1	1	1	1	1	1	1
EAX81877	TVAG_000950	1	0	-3.13467	0	1	0	1	0		0	0	0	0	0	0	0	0		1	1	1	1	1	1	1	1
EAX76175	TVAG_001010	1	0	-3.13467	0	1	0	1	0		0	0	0	0	0	0	0	0		1	1	1	1	1	1	1	1
EAX76176	TVAG_001020	1	0	-3.13467	0	1	0	1	0		0	0	0	0	0	0	0	0		1	1	1	1	1	1	1	1
EAX82836	TVAG_001050	1	0	-3.13467	0	1	0	1	0		0	0	0	0	0	0	0	0		1	1	1	1	1	1	1	1
EAX79481	TVAG_001060	1	0	-3.13467	0	1	0	1	0		0	0	0	0	0	0	0	0		1	1	1	1	1	1	1	1
EAX79482	TVAG_001070	1	0	-3.13467	0	1	0	1	0		0	0	0	0	0	0	0	0		1	1	1	1	1	1	1	1
EAX79483	TVAG_001080	1	0	-3.13467	0	1	0	1	0		0	0	0	0	0	0	0	0		1	1	1	1	1	1	1	1
EAX82590	TVAG_001090	1	0	-3.13467	0	1	0	1	0		0	0	0	0	0	0	0	0		1	1	1	1	1	1	1	1
EAX82591	TVAG_001100	1	0	-3.13467	0	1	0	1	0		0	0	0	0	0	0	0	0		1	1	1	1	1	1	1	1
EAX82594	TVAG_001110	1	0	-3.13467	0	1	0	1	0		0	0	0	0	0	0	0	0		1	1	1	1	1	1	1	1
EAX87727	TVAG_001150	1	0	-3.13467	0	1	0	1	0		0	0	0	0	0	0	0	0		1	1	1	1	1	1	1	1
EAX87728	TVAG_001160	1	0	-3.13467	0	1	0	1	0		0	0	0	0	0	0	0	0		1	1	1	1	1	1	1	1
EAX87731	TVAG_001170	1	0	-3.13467	0	1	0	1	0		0	0	0	0	0	0	0	0		1	1	1	1	1	1	1	1
EAX87732	TVAG_001180	1	0	-3.13467	0	1	0	1	0		0	0	0	0	0	0	0	0		1	1	1	1	1	1	1	1
EAX87739	TVAG_001190	1	0	-3.13467	0	1	0	1	0		0	0	0	0	0	0	0	0		1	1	1	1	1	1	1	1
EAX76925	TVAG_001200	1	0	-3.13467	0	1	0	1	0		0	0	0	0	0	0	0	0		1	1	1	1	1	1	1	1
EAX76926	TVAG_001210	1	0	-3.13467	0	1	0	1	0		0	0	0	0	0	0	0	0		1	1	1	1	1	1	1	1
EAX84391	TVAG_001220	1	0	-3.13467	0	1	0	1	0		0	0	0	0	0	0	0	0		1	1	1	1	1	1	1	1
EAX74990	TVAG_001230	1	0	-3.13467	0	1	0	1	0		0	0	0	0	0	0	0	0		1	1	1	1	1	1	1	1
EAX80026	TVAG_001240	1	0	-3.13467	0	1	0	1	0		0	0	0	0	0	0	0	0		1	1	1	1	1	1	1	1
EAX80027	TVAG_001250	1	0	-3.13467	0	1	0	1	0		0	0	0	0	0	0	0	0		1	1	1	1	1	1	1	1
EAX83373	TVAG_001260	1	0	-3.13467	0	1	0	1	0		0	0	0	0	0	0	0	0		1	1	1	1	1	1	1	1
EAX83374	TVAG_001270	1	0	-3.13467	0	1	0	1	0		0	0	0	0	0	0	0	0		1	1	1	1	1	1	1	1
EAX75858	TVAG_001280	1	0	-3.13467	0	1	0	1	0		0	0	0	0	0	0	0	0		1	1	1	1	1	1	1	1
EAX79749	TVAG_001290	1	0	-3.13467	0	1	0	1	0		0	0	0	0	0	0	0	0		1	1	1	1	1	1	1	1
EAX78464	TVAG_001300	1	0	-3.13467	0	1	0	1	0		0	0	0	0	0	0	0	0		1	1	1	1	1	1	1	1
EAX84483	TVAG_001310	1	0	-3.13467	0	1	0	1	0		0	0	0	0	0	0	0	0		1	1	1	1	1	1	1	1
EAX83041	TVAG_001330	1	0	-3.13467	0	1	0	1	0		0	0	0	0	0	0	0	0		1	1	1	1	1	1	1	1
EAX85007	TVAG_001340	1	0	-3.13467	0	1	0	1	0		0	0	0	0	0	0	0	0		1	1	1	1	1	1	1	1
EAX85009	TVAG_001350	1	0	-3.13467	0	1	0	1	0		0	0	0	0	0	0	0	0		1	1	1	1	1	1	1	1
EAX85010	TVAG_001360	1	0	-3.13467	0	1	0	1	0		0	0	0	0	0	0	0	0		1	1	1	1	1	1	1	1
EAX85011	TVAG_001370	1	0	-3.13467	0	1	0	1	0		0	0	0	0	0	0	0	0		1	1	1	1	1	1	1	1
EAX78785	TVAG_001390	1	0	-3.13467	0	1	0	1	0		0	0	0	0	0	0	0	0		1	1	1	1	1	1	1	1
EAX83993	TVAG_001400	1	0	-3.13467	0	1	0	1	0		0	0	0	0	0	0	0	0		1	1	1	1	1	1	1	1
EAX77678	TVAG_001710	1	0	-3.13467	0	1	0	1	0		0	0	0	0	0	0	0	0		1	1	1	1	1	1	1	1
EAX81807	TVAG_001720	1	0	-3.13467	0	1	0	1	0		0	0	0	0	0	0	0	0		1	1	1	1	1	1	1	1
EAX81808	TVAG_001730	1	0	-3.13467	0	1	0	1	0		0	0	0	0	0	0	0	0		1	1	1	1	1	1	1	1
EAX71005	TVAG_001740	1	0	-3.13467	0	1	0	1	0		0	0	0	0	0	0	0	0		1	1	1	1	1	1	1	1
EAX71006	TVAG_001750	1	0	-3.13467	0	1	0	1	0		0	0	0	0	0	0	0	0		1	1	1	1	1	1	1	1
EAX78628	TVAG_001760	1	0	-3.13467	0	1	0	1	0		0	0	0	0	0	0	0	0		1	1	1	1	1	1	1	1
EAX78681	TVAG_001770	1	0	-3.13467	0	1	0	1	0		0	0	0	0	0	0	0	0		1	1	1	1	1	1	1	1
EAX80404	TVAG_001780	1	0	-3.13467	0	1	0	1	0		0	0	0	0	0	0	0	0		1	1	1	1	1	1	1	1
EAX80405	TVAG_001790	1	0	-3.13467	0	1	0	1	0		0	0	0	0	0	0	0	0		1	1	1	1	1	1	1	1
EAX80406	TVAG_001800	1	0	-3.13467	0	1	0	1	0		0	0	0	0	0	0	0	0		1	1	1	1	1	1	1	1
EAX80744	TVAG_001810	1	0	-3.13467	0	1	0	1	0		0	0	0	0	0	0	0	0		1	1	1	1	1	1	1	1
EAX80745	TVAG_001820	1	0	-3.13467	0	1	0	1	0		0	0	0	0	0	0	0	0		1	1	1	1	1	1	1	1
EAX84246	TVAG_002010	1	0	-3.13467	0	1	0	1	0		0	0	0	0	0	0	0	0		1	1	1	1	1	1	1	1
EAX84247	TVAG_002020	1	0	-3.13467	0	1	0	1	0		0	0	0	0	0	0	0	0		1	1	1	1	1	1	1	1
EAX84252	TVAG_002030	1	0	-3.13467	0	1	0	1	0		0	0	0	0	0	0	0	0		1	1	1	1	1	1	1	1
EAX84253	TVAG_002040	1	0	-3.13467	0	1	0	1	0		0	0	0	0	0	0	0	0		1	1	1	1	1	1	1	1
EAX84254	TVAG_002050	1	0	-3.13467	0	1	0	1	0		0	0	0	0	0	0	0	0		1	1	1	1	1	1	1	1
EAX84255	TVAG_002070	1	0	-3.13467	0	1	0	1	0		0	0	0	0	0	0	0	0		1	1	1	1	1	1	1	1
EAX75864	TVAG_002110	1	0	-3.13467	0	1	0	1	0		0	0	0	0	0	0	0	0		1	1	1	1	1	1	1	1
EAX72574	TVAG_002120	1	0	-3.13467	0	1	0	1	0		0	0	0	0	0	0	0	0		1	1	1	1	1	1	1	1
EAX67212	TVAG_002130	1	0	-3.13467	0	1	0	1	0		0	0	0	0	0	0	0	0		1	1	1	1	1	1	1	1
EAX67544	TVAG_002140	1	0	-3.13467	0	1	0	1	0		0	0	0	0	0	0	0	0		1	1	1	1	1	1	1	1
EAX76641	TVAG_002410	1	0	-3.13467	0	1	0	1	0		0	0	0	0	0	0	0	0		1	1	1	1	1	1	1	1
EAX74104	TVAG_002420	1	0	-3.13467	0	1	0	1	0		0	0	0	0	0	0	0	0		1	1	1	1	1	1	1	1
EAX76395	TVAG_002440	1	0	-3.13467	0	1	0	1	0		0	0	0	0	0	0	0	0		1	1	1	1	1	1	1	1
EAX64126	TVAG_002460	1	0	-3.13467	0	1	0	1	0		0	0	0	0	0	0	0	0		1	1	1	1	1	1	1	1
EAX85615	TVAG_002480	1	0	-3.13467	0	1	0	1	0		0	0	0	0	0	0	0	0		1	1	1	1	1	1	1	1
EAX85616	TVAG_002490	1	0	-3.13467	0	1	0	1	0		0	0	0	0	0	0	0	0		1	1	1	1	1	1	1	1
EAX80599	TVAG_002500	1	0	-3.13467	0	1	0	1	0		0	0	0	0	0	0	0	0		1	1	1	1	1	1	1	1
EAX80059	TVAG_002510	1	0	-3.13467	0	1	0	1	0		0	0	0	0	0	0	0	0		1	1	1	1	1	1	1	1
EAX80061	TVAG_002520	1	0	-3.13467	0	1	0	1	0		0	0	0	0	0	0	0	0		1	1	1	1	1	1	1	1
EAX80062	TVAG_002530	1	0	-3.13467	0	1	0	1	0		0	0	0	0	0	0	0	0		1	1	1	1	1	1	1	1
EAX81726	TVAG_002560	1	0	-3.13467	0	1	0	1	0		0	0	0	0	0	0	0	0		1	1	1	1	1	1	1	1
EAX87586	TVAG_002580	1	0	-3.13467	0	1	0	1	0		0	0	0	0	0	0	0	0		1	1	1	1	1	1	1	1
EAX87587	TVAG_002590	1	0	-3.13467	0	1	0	1	0		0	0	0	0	0	0	0	0		1	1	1	1	1	1	1	1
EAX87589	TVAG_002600	1	0	-3.13467	0	1	0	1	0		0	0	0	0	0	0	0	0		1	1	1	1	1	1	1	1
EAX87590	TVAG_002630	1	0	-3.13467	0	1	0	1	0		0	0	0	0	0	0	0	0		1	1	1	1	1	1	1	1
EAX74989	TVAG_002640	1	0	-3.13467	0	1	0	1	0		0	0	0	0	0	0	0	0		1	1	1	1	1	1	1	1
EAX87936	TVAG_002720	1	0	-3.13467	0	1	0	1	0		0	0	0	0	0	0	0	0		1	1	1	1	1	1	1	1
EAX87949	TVAG_002740	1	0	-3.13467	0	1	0	1	0		0	0	0	0	0	0	0	0		1	1	1	1	1	1	1	1
EAX87952	TVAG_002750	1	0	-3.13467	0	1	0	1	0		0	0	0	0	0	0	0	0		1	1	1	1	1	1	1	1
EAX85879	TVAG_002780	1	0	-3.13467	0	1	0	1	0		0	0	0	0	0	0	0	0		1	1	1	1	1	1	1	1
EAX76164	TVAG_002790	1	0	-3.13467	0	1	0	1	0		0	0	0	0	0	0	0	0		1	1	1	1	1	1	1	1
EAX76165	TVAG_002800	1	0	-3.13467	0	1	0	1	0		0	0	0	0	0	0	0	0		1	1	1	1	1	1	1	1
EAX77171	TVAG_002820	1	0	-3.13467	0	1	0	1	0		0	0	0	0	0	0	0	0		1	1	1	1	1	1	1	1
EAX68526	TVAG_002830	1	0	-3.13467	0	1	0	1	0		0	0	0	0	0	0	0	0		1	1	1	1	1	1	1	1
EAX85514	TVAG_003170	1	0	-3.13467	0	1	0	1	0		0	0	0	0	0	0	0	0		1	1	1	1	1	1	1	1
EAX86165	TVAG_003380	1	0	-3.13467	0	1	0	1	0		0	0	0	0	0	0	0	0		1	1	1	1	1	1	1	1
EAX86166	TVAG_003390	1	0	-3.13467	0	1	0	1	0		0	0	0	0	0	0	0	0		1	1	1	1	1	1	1	1
EAX86170	TVAG_003400	1	0	-3.13467	0	1	0	1	0		0	0	0	0	0	0	0	0		1	1	1	1	1	1	1	1
EAX86172	TVAG_003410	1	0	-3.13467	0	1	0	1	0		0	0	0	0	0	0	0	0		1	1	1	1	1	1	1	1
EAX74174	TVAG_003420	1	0	-3.13467	0	1	0	1	0		0	0	0	0	0	0	0	0		1	1	1	1	1	1	1	1
EAX71184	TVAG_003430	1	0	-3.13467	0	1	0	1	0		0	0	0	0	0	0	0	0		1	1	1	1	1	1	1	1
EAX72828	TVAG_003450	1	0	-3.13467	0	1	0	1	0		0	0	0	0	0	0	0	0		1	1	1	1	1	1	1	1
EAX74455	TVAG_003470	1	0	-3.13467	0	1	0	1	0		0	0	0	0	0	0	0	0		1	1	1	1	1	1	1	1
EAX70487	TVAG_003480	1	0	-3.13467	0	1	0	1	0		0	0	0	0	0	0	0	0		1	1	1	1	1	1	1	1
EAX82123	TVAG_004120	1	0	-3.13467	0	1	0	1	0		0	0	0	0	0	0	0	0		1	1	1	1	1	1	1	1
EAX77339	TVAG_004130	1	0	-3.13467	0	1	0	1	0		0	0	0	0	0	0	0	0		1	1	1	1	1	1	1	1
EAX73190	TVAG_004140	1	0	-3.13467	0	1	0	1	0		0	0	0	0	0	0	0	0		1	1	1	1	1	1	1	1
EAX79404	TVAG_004150	1	0	-3.13467	0	1	0	1	0		0	0	0	0	0	0	0	0		1	1	1	1	1	1	1	1
EAX84830	TVAG_004290	1	0	-3.13467	0	1	0	1	0		0	0	0	0	0	0	0	0		1	1	1	1	1	1	1	1
EAX79378	TVAG_004320	1	0	-3.13467	0	1	0	1	0		0	0	0	0	0	0	0	0		1	1	1	1	1	1	1	1
EAX72529	TVAG_004330	1	0	-3.13467	0	1	0	1	0		0	0	0	0	0	0	0	0		1	1	1	1	1	1	1	1
EAX77928	TVAG_004340	1	0	-3.13467	0	1	0	1	0		0	0	0	0	0	0	0	0		1	1	1	1	1	1	1	1
EAX75812	TVAG_004350	1	0	-3.13467	0	1	0	1	0		0	0	0	0	0	0	0	0		1	1	1	1	1	1	1	1
EAX79770	TVAG_004360	1	0	-3.13467	0	1	0	1	0		0	0	0	0	0	0	0	0		1	1	1	1	1	1	1	1
EAX83296	TVAG_004380	1	0	-3.13467	0	1	0	1	0		0	0	0	0	0	0	0	0		1	1	1	1	1	1	1	1
EAX83297	TVAG_004390	1	0	-3.13467	0	1	0	1	0		0	0	0	0	0	0	0	0		1	1	1	1	1	1	1	1
EAX69836	TVAG_004970	1	0	-3.13467	0	1	0	1	0		0	0	0	0	0	0	0	0		1	1	1	1	1	1	1	1
EAX80920	TVAG_004990	1	0	-3.13467	0	1	0	1	0		0	0	0	0	0	0	0	0		1	1	1	1	1	1	1	1
EAX73422	TVAG_005080	1	0	-3.13467	0	1	0	1	0		0	0	0	0	0	0	0	0		1	1	1	1	1	1	1	1
EAX78922	TVAG_005090	1	0	-3.13467	0	1	0	1	0		0	0	0	0	0	0	0	0		1	1	1	1	1	1	1	1
EAX83941	TVAG_005100	1	0	-3.13467	0	1	0	1	0		0	0	0	0	0	0	0	0		1	1	1	1	1	1	1	1
EAX83944	TVAG_005110	1	0	-3.13467	0	1	0	1	0		0	0	0	0	0	0	0	0		1	1	1	1	1	1	1	1
EAX83945	TVAG_005120	1	0	-3.13467	0	1	0	1	0		0	0	0	0	0	0	0	0		1	1	1	1	1	1	1	1
EAX83946	TVAG_005130	1	0	-3.13467	0	1	0	1	0		0	0	0	0	0	0	0	0		1	1	1	1	1	1	1	1
EAX83947	TVAG_005140	1	0	-3.13467	0	1	0	1	0		0	0	0	0	0	0	0	0		1	1	1	1	1	1	1	1
EAX83948	TVAG_005150	1	0	-3.13467	0	1	0	1	0		0	0	0	0	0	0	0	0		1	1	1	1	1	1	1	1
EAX66309	TVAG_005160	1	0	-3.13467	0	1	0	1	0		0	0	0	0	0	0	0	0		1	1	1	1	1	1	1	1
EAX76216	TVAG_005170	1	0	-3.13467	0	1	0	1	0		0	0	0	0	0	0	0	0		1	1	1	1	1	1	1	1
EAX79950	TVAG_005180	1	0	-3.13467	0	1	0	1	0		0	0	0	0	0	0	0	0		1	1	1	1	1	1	1	1
EAX71996	TVAG_005190	1	0	-3.13467	0	1	0	1	0		0	0	0	0	0	0	0	0		1	1	1	1	1	1	1	1
EAX74982	TVAG_005200	1	0	-3.13467	0	1	0	1	0		0	0	0	0	0	0	0	0		1	1	1	1	1	1	1	1
EAX77317	TVAG_005210	1	0	-3.13467	0	1	0	1	0		0	0	0	0	0	0	0	0		1	1	1	1	1	1	1	1
EAX71185	TVAG_005590	1	0	-3.13467	0	1	0	1	0		0	0	0	0	0	0	0	0		1	1	1	1	1	1	1	1
EAX85531	TVAG_005600	1	0	-3.13467	0	1	0	1	0		0	0	0	0	0	0	0	0		1	1	1	1	1	1	1	1
EAX85532	TVAG_005610	1	0	-3.13467	0	1	0	1	0		0	0	0	0	0	0	0	0		1	1	1	1	1	1	1	1
EAX85538	TVAG_005620	1	0	-3.13467	0	1	0	1	0		0	0	0	0	0	0	0	0		1	1	1	1	1	1	1	1
EAX73024	TVAG_005630	1	0	-3.13467	0	1	0	1	0		0	0	0	0	0	0	0	0		1	1	1	1	1	1	1	1
EAX71818	TVAG_005840	1	0	-3.13467	0	1	0	1	0		0	0	0	0	0	0	0	0		1	1	1	1	1	1	1	1
EAX83049	TVAG_006500	1	0	-3.13467	0	1	0	1	0		0	0	0	0	0	0	0	0		1	1	1	1	1	1	1	1
EAX71638	TVAG_006720	1	0	-3.13467	0	1	0	1	0		0	0	0	0	0	0	0	0		1	1	1	1	1	1	1	1
EAX79757	TVAG_007030	1	0	-3.13467	0	1	0	1	0		0	0	0	0	0	0	0	0		1	1	1	1	1	1	1	1
EAX78022	TVAG_007850	1	0	-3.13467	0	1	0	1	0		0	0	0	0	0	0	0	0		1	1	1	1	1	1	1	1
EAX78023	TVAG_007860	1	0	-3.13467	0	1	0	1	0		0	0	0	0	0	0	0	0		1	1	1	1	1	1	1	1
EAX83522	TVAG_007870	1	0	-3.13467	0	1	0	1	0		0	0	0	0	0	0	0	0		1	1	1	1	1	1	1	1
EAX77304	TVAG_007890	1	0	-3.13467	0	1	0	1	0		0	0	0	0	0	0	0	0		1	1	1	1	1	1	1	1
EAX73771	TVAG_007900	1	0	-3.13467	0	1	0	1	0		0	0	0	0	0	0	0	0		1	1	1	1	1	1	1	1
EAX68338	TVAG_008210	1	0	-3.13467	0	1	0	1	0		0	0	0	0	0	0	0	0		1	1	1	1	1	1	1	1
EAX70742	TVAG_008220	1	0	-3.13467	0	1	0	1	0		0	0	0	0	0	0	0	0		1	1	1	1	1	1	1	1
EAX85921	TVAG_008230	1	0	-3.13467	0	1	0	1	0		0	0	0	0	0	0	0	0		1	1	1	1	1	1	1	1
EAX85922	TVAG_008240	1	0	-3.13467	0	1	0	1	0		0	0	0	0	0	0	0	0		1	1	1	1	1	1	1	1
EAX85923	TVAG_008250	1	0	-3.13467	0	1	0	1	0		0	0	0	0	0	0	0	0		1	1	1	1	1	1	1	1
EAX79056	TVAG_008260	1	0	-3.13467	0	1	0	1	0		0	0	0	0	0	0	0	0		1	1	1	1	1	1	1	1
EAX76877	TVAG_008280	1	0	-3.13467	0	1	0	1	0		0	0	0	0	0	0	0	0		1	1	1	1	1	1	1	1
EAX76878	TVAG_008290	1	0	-3.13467	0	1	0	1	0		0	0	0	0	0	0	0	0		1	1	1	1	1	1	1	1
EAX76075	TVAG_008300	1	0	-3.13467	0	1	0	1	0		0	0	0	0	0	0	0	0		1	1	1	1	1	1	1	1
EAX77019	TVAG_008310	1	0	-3.13467	0	1	0	1	0		0	0	0	0	0	0	0	0		1	1	1	1	1	1	1	1
EAX77689	TVAG_008320	1	0	-3.13467	0	1	0	1	0		0	0	0	0	0	0	0	0		1	1	1	1	1	1	1	1
EAX81204	TVAG_008340	1	0	-3.13467	0	1	0	1	0		0	0	0	0	0	0	0	0		1	1	1	1	1	1	1	1
EAX81205	TVAG_008350	1	0	-3.13467	0	1	0	1	0		0	0	0	0	0	0	0	0		1	1	1	1	1	1	1	1
EAX82333	TVAG_008360	1	0	-3.13467	0	1	0	1	0		0	0	0	0	0	0	0	0		1	1	1	1	1	1	1	1
EAX70796	TVAG_008370	1	0	-3.13467	0	1	0	1	0		0	0	0	0	0	0	0	0		1	1	1	1	1	1	1	1
EAX74094	TVAG_008380	1	0	-3.13467	0	1	0	1	0		0	0	0	0	0	0	0	0		1	1	1	1	1	1	1	1
EAX70643	TVAG_008390	1	0	-3.13467	0	1	0	1	0		0	0	0	0	0	0	0	0		1	1	1	1	1	1	1	1
EAX70644	TVAG_008400	1	0	-3.13467	0	1	0	1	0		0	0	0	0	0	0	0	0		1	1	1	1	1	1	1	1
EAX79453	TVAG_008410	1	0	-3.13467	0	1	0	1	0		0	0	0	0	0	0	0	0		1	1	1	1	1	1	1	1
EAX80018	TVAG_008430	1	0	-3.13467	0	1	0	1	0		0	0	0	0	0	0	0	0		1	1	1	1	1	1	1	1
EAX74090	TVAG_008440	1	0	-3.13467	0	1	0	1	0		0	0	0	0	0	0	0	0		1	1	1	1	1	1	1	1
EAX74170	TVAG_008450	1	0	-3.13467	0	1	0	1	0		0	0	0	0	0	0	0	0		1	1	1	1	1	1	1	1
EAX72426	TVAG_008460	1	0	-3.13467	0	1	0	1	0		0	0	0	0	0	0	0	0		1	1	1	1	1	1	1	1
EAX89247	TVAG_008530	1	0	-3.13467	0	1	0	1	0		0	0	0	0	0	0	0	0		1	1	1	1	1	1	1	1
EAX89248	TVAG_008540	1	0	-3.13467	0	1	0	1	0		0	0	0	0	0	0	0	0		1	1	1	1	1	1	1	1
EAX84017	TVAG_008550	1	0	-3.13467	0	1	0	1	0		0	0	0	0	0	0	0	0		1	1	1	1	1	1	1	1
EAX84018	TVAG_008560	1	0	-3.13467	0	1	0	1	0		0	0	0	0	0	0	0	0		1	1	1	1	1	1	1	1
EAX84019	TVAG_008570	1	0	-3.13467	0	1	0	1	0		0	0	0	0	0	0	0	0		1	1	1	1	1	1	1	1
EAX84021	TVAG_008580	1	0	-3.13467	0	1	0	1	0		0	0	0	0	0	0	0	0		1	1	1	1	1	1	1	1
EAX78348	TVAG_008590	1	0	-3.13467	0	1	0	1	0		0	0	0	0	0	0	0	0		1	1	1	1	1	1	1	1
EAX72952	TVAG_009030	1	0	-3.13467	0	1	0	1	0		0	0	0	0	0	0	0	0		1	1	1	1	1	1	1	1
EAX79356	TVAG_009040	1	0	-3.13467	0	1	0	1	0		0	0	0	0	0	0	0	0		1	1	1	1	1	1	1	1
EAX82203	TVAG_009070	1	0	-3.13467	0	1	0	1	0		0	0	0	0	0	0	0	0		1	1	1	1	1	1	1	1
EAX78941	TVAG_009090	1	0	-3.13467	0	1	0	1	0		0	0	0	0	0	0	0	0		1	1	1	1	1	1	1	1
EAX73339	TVAG_009100	1	0	-3.13467	0	1	0	1	0		0	0	0	0	0	0	0	0		1	1	1	1	1	1	1	1
EAX76917	TVAG_009110	1	0	-3.13467	0	1	0	1	0		0	0	0	0	0	0	0	0		1	1	1	1	1	1	1	1
EAX83660	TVAG_009130	1	0	-3.13467	0	1	0	1	0		0	0	0	0	0	0	0	0		1	1	1	1	1	1	1	1
EAX74885	TVAG_009250	1	0	-3.13467	0	1	0	1	0		0	0	0	0	0	0	0	0		1	1	1	1	1	1	1	1
EAX69708	TVAG_009260	1	0	-3.13467	0	1	0	1	0		0	0	0	0	0	0	0	0		1	1	1	1	1	1	1	1
EAX70797	TVAG_009410	1	0	-3.13467	0	1	0	1	0		0	0	0	0	0	0	0	0		1	1	1	1	1	1	1	1
EAX89246	TVAG_009550	1	0	-3.13467	0	1	0	1	0		0	0	0	0	0	0	0	0		1	1	1	1	1	1	1	1
EAX81519	TVAG_009560	1	0	-3.13467	0	1	0	1	0		0	0	0	0	0	0	0	0		1	1	1	1	1	1	1	1
EAX80559	TVAG_009570	1	0	-3.13467	0	1	0	1	0		0	0	0	0	0	0	0	0		1	1	1	1	1	1	1	1
EAX68829	TVAG_009920	1	0	-3.13467	0	1	0	1	0		0	0	0	0	0	0	0	0		1	1	1	1	1	1	1	1
EAX68830	TVAG_009930	1	0	-3.13467	0	1	0	1	0		0	0	0	0	0	0	0	0		1	1	1	1	1	1	1	1
EAX78621	TVAG_010350	1	0	-3.13467	0	1	0	1	0		0	0	0	0	0	0	0	0		1	1	1	1	1	1	1	1
EAX78622	TVAG_010360	1	0	-3.13467	0	1	0	1	0		0	0	0	0	0	0	0	0		1	1	1	1	1	1	1	1
EAX78623	TVAG_010370	1	0	-3.13467	0	1	0	1	0		0	0	0	0	0	0	0	0		1	1	1	1	1	1	1	1
EAX77279	TVAG_010380	1	0	-3.13467	0	1	0	1	0		0	0	0	0	0	0	0	0		1	1	1	1	1	1	1	1
EAX79428	TVAG_010390	1	0	-3.13467	0	1	0	1	0		0	0	0	0	0	0	0	0		1	1	1	1	1	1	1	1
EAX75507	TVAG_010410	1	0	-3.13467	0	1	0	1	0		0	0	0	0	0	0	0	0		1	1	1	1	1	1	1	1
EAX76746	TVAG_010430	1	0	-3.13467	0	1	0	1	0		0	0	0	0	0	0	0	0		1	1	1	1	1	1	1	1
EAX76747	TVAG_010440	1	0	-3.13467	0	1	0	1	0		0	0	0	0	0	0	0	0		1	1	1	1	1	1	1	1
EAX76748	TVAG_010450	1	0	-3.13467	0	1	0	1	0		0	0	0	0	0	0	0	0		1	1	1	1	1	1	1	1
EAX75902	TVAG_010460	1	0	-3.13467	0	1	0	1	0		0	0	0	0	0	0	0	0		1	1	1	1	1	1	1	1
EAX75903	TVAG_010470	1	0	-3.13467	0	1	0	1	0		0	0	0	0	0	0	0	0		1	1	1	1	1	1	1	1
EAX82341	TVAG_011210	1	0	-3.13467	0	1	0	1	0		0	0	0	0	0	0	0	0		1	1	1	1	1	1	1	1
EAX79253	TVAG_011380	1	0	-3.13467	0	1	0	1	0		0	0	0	0	0	0	0	0		1	1	1	1	1	1	1	1
EAX82538	TVAG_011390	1	0	-3.13467	0	1	0	1	0		0	0	0	0	0	0	0	0		1	1	1	1	1	1	1	1
EAX79754	TVAG_011590	1	0	-3.13467	0	1	0	1	0		0	0	0	0	0	0	0	0		1	1	1	1	1	1	1	1
EAX85406	TVAG_011600	1	0	-3.13467	0	1	0	1	0		0	0	0	0	0	0	0	0		1	1	1	1	1	1	1	1
EAX81473	TVAG_011820	1	0	-3.13467	0	1	0	1	0		0	0	0	0	0	0	0	0		1	1	1	1	1	1	1	1
EAX78857	TVAG_011830	1	0	-3.13467	0	1	0	1	0		0	0	0	0	0	0	0	0		1	1	1	1	1	1	1	1
EAX68835	TVAG_011850	1	0	-3.13467	0	1	0	1	0		0	0	0	0	0	0	0	0		1	1	1	1	1	1	1	1
EAX84273	TVAG_011860	1	0	-3.13467	0	1	0	1	0		0	0	0	0	0	0	0	0		1	1	1	1	1	1	1	1
EAX84274	TVAG_011870	1	0	-3.13467	0	1	0	1	0		0	0	0	0	0	0	0	0		1	1	1	1	1	1	1	1
EAX85029	TVAG_011880	1	0	-3.13467	0	1	0	1	0		0	0	0	0	0	0	0	0		1	1	1	1	1	1	1	1
EAX85030	TVAG_011890	1	0	-3.13467	0	1	0	1	0		0	0	0	0	0	0	0	0		1	1	1	1	1	1	1	1
EAX79040	TVAG_011910	1	0	-3.13467	0	1	0	1	0		0	0	0	0	0	0	0	0		1	1	1	1	1	1	1	1
EAX79041	TVAG_011920	1	0	-3.13467	0	1	0	1	0		0	0	0	0	0	0	0	0		1	1	1	1	1	1	1	1
EAX73804	TVAG_011930	1	0	-3.13467	0	1	0	1	0		0	0	0	0	0	0	0	0		1	1	1	1	1	1	1	1
EAX79158	TVAG_011940	1	0	-3.13467	0	1	0	1	0		0	0	0	0	0	0	0	0		1	1	1	1	1	1	1	1
EAX86538	TVAG_011960	1	0	-3.13467	0	1	0	1	0		0	0	0	0	0	0	0	0		1	1	1	1	1	1	1	1
EAX86539	TVAG_011970	1	0	-3.13467	0	1	0	1	0		0	0	0	0	0	0	0	0		1	1	1	1	1	1	1	1
EAX86540	TVAG_011980	1	0	-3.13467	0	1	0	1	0		0	0	0	0	0	0	0	0		1	1	1	1	1	1	1	1
EAX86541	TVAG_011990	1	0	-3.13467	0	1	0	1	0		0	0	0	0	0	0	0	0		1	1	1	1	1	1	1	1
EAX69857	TVAG_012010	1	0	-3.13467	0	1	0	1	0		0	0	0	0	0	0	0	0		1	1	1	1	1	1	1	1
EAX74349	TVAG_012020	1	0	-3.13467	0	1	0	1	0		0	0	0	0	0	0	0	0		1	1	1	1	1	1	1	1
EAX76901	TVAG_012030	1	0	-3.13467	0	1	0	1	0		0	0	0	0	0	0	0	0		1	1	1	1	1	1	1	1
EAX80768	TVAG_012040	1	0	-3.13467	0	1	0	1	0		0	0	0	0	0	0	0	0		1	1	1	1	1	1	1	1
EAX74681	TVAG_012050	1	0	-3.13467	0	1	0	1	0		0	0	0	0	0	0	0	0		1	1	1	1	1	1	1	1
EAX78778	TVAG_012060	1	0	-3.13467	0	1	0	1	0		0	0	0	0	0	0	0	0		1	1	1	1	1	1	1	1
EAX88354	TVAG_012090	1	0	-3.13467	0	1	0	1	0		0	0	0	0	0	0	0	0		1	1	1	1	1	1	1	1
EAX88355	TVAG_012100	1	0	-3.13467	0	1	0	1	0		0	0	0	0	0	0	0	0		1	1	1	1	1	1	1	1
EAX88356	TVAG_012110	1	0	-3.13467	0	1	0	1	0		0	0	0	0	0	0	0	0		1	1	1	1	1	1	1	1
EAX88357	TVAG_012120	1	0	-3.13467	0	1	0	1	0		0	0	0	0	0	0	0	0		1	1	1	1	1	1	1	1
EAX88358	TVAG_012130	1	0	-3.13467	0	1	0	1	0		0	0	0	0	0	0	0	0		1	1	1	1	1	1	1	1
EAX88362	TVAG_012150	1	0	-3.13467	0	1	0	1	0		0	0	0	0	0	0	0	0		1	1	1	1	1	1	1	1
EAX77061	TVAG_012160	1	0	-3.13467	0	1	0	1	0		0	0	0	0	0	0	0	0		1	1	1	1	1	1	1	1
EAX77063	TVAG_012170	1	0	-3.13467	0	1	0	1	0		0	0	0	0	0	0	0	0		1	1	1	1	1	1	1	1
EAX81082	TVAG_012190	1	0	-3.13467	0	1	0	1	0		0	0	0	0	0	0	0	0		1	1	1	1	1	1	1	1
EAX83252	TVAG_012200	1	0	-3.13467	0	1	0	1	0		0	0	0	0	0	0	0	0		1	1	1	1	1	1	1	1
EAX83253	TVAG_012210	1	0	-3.13467	0	1	0	1	0		0	0	0	0	0	0	0	0		1	1	1	1	1	1	1	1
EAX88338	TVAG_012640	1	0	-3.13467	0	1	0	1	0		0	0	0	0	0	0	0	0		1	1	1	1	1	1	1	1
EAX65135	TVAG_012710	1	0	-3.13467	0	1	0	1	0		0	0	0	0	0	0	0	0		1	1	1	1	1	1	1	1
EAX71028	TVAG_012720	1	0	-3.13467	0	1	0	1	0		0	0	0	0	0	0	0	0		1	1	1	1	1	1	1	1
EAX70642	TVAG_012730	1	0	-3.13467	0	1	0	1	0		0	0	0	0	0	0	0	0		1	1	1	1	1	1	1	1
EAX87009	TVAG_012740	1	0	-3.13467	0	1	0	1	0		0	0	0	0	0	0	0	0		1	1	1	1	1	1	1	1
EAX87010	TVAG_012770	1	0	-3.13467	0	1	0	1	0		0	0	0	0	0	0	0	0		1	1	1	1	1	1	1	1
EAX87016	TVAG_012790	1	0	-3.13467	0	1	0	1	0		0	0	0	0	0	0	0	0		1	1	1	1	1	1	1	1
EAX83465	TVAG_012800	1	0	-3.13467	0	1	0	1	0		0	0	0	0	0	0	0	0		1	1	1	1	1	1	1	1
EAX83467	TVAG_012820	1	0	-3.13467	0	1	0	1	0		0	0	0	0	0	0	0	0		1	1	1	1	1	1	1	1
EAX78985	TVAG_012840	1	0	-3.13467	0	1	0	1	0		0	0	0	0	0	0	0	0		1	1	1	1	1	1	1	1
EAX84737	TVAG_012900	1	0	-3.13467	0	1	0	1	0		0	0	0	0	0	0	0	0		1	1	1	1	1	1	1	1
EAX84742	TVAG_012910	1	0	-3.13467	0	1	0	1	0		0	0	0	0	0	0	0	0		1	1	1	1	1	1	1	1
EAX84744	TVAG_012920	1	0	-3.13467	0	1	0	1	0		0	0	0	0	0	0	0	0		1	1	1	1	1	1	1	1
EAX87758	TVAG_014400	1	0	-3.13467	0	1	0	1	0		0	0	0	0	0	0	0	0		1	1	1	1	1	1	1	1
EAX87759	TVAG_014430	1	0	-3.13467	0	1	0	1	0		0	0	0	0	0	0	0	0		1	1	1	1	1	1	1	1
EAX87760	TVAG_014440	1	0	-3.13467	0	1	0	1	0		0	0	0	0	0	0	0	0		1	1	1	1	1	1	1	1
EAX87761	TVAG_014450	1	0	-3.13467	0	1	0	1	0		0	0	0	0	0	0	0	0		1	1	1	1	1	1	1	1
EAX87762	TVAG_014460	1	0	-3.13467	0	1	0	1	0		0	0	0	0	0	0	0	0		1	1	1	1	1	1	1	1
EAX87763	TVAG_014470	1	0	-3.13467	0	1	0	1	0		0	0	0	0	0	0	0	0		1	1	1	1	1	1	1	1
EAX73924	TVAG_014480	1	0	-3.13467	0	1	0	1	0		0	0	0	0	0	0	0	0		1	1	1	1	1	1	1	1
EAX73925	TVAG_014490	1	0	-3.13467	0	1	0	1	0		0	0	0	0	0	0	0	0		1	1	1	1	1	1	1	1
EAX73927	TVAG_014500	1	0	-3.13467	0	1	0	1	0		0	0	0	0	0	0	0	0		1	1	1	1	1	1	1	1
EAX74043	TVAG_014530	1	0	-3.13467	0	1	0	1	0		0	0	0	0	0	0	0	0		1	1	1	1	1	1	1	1
EAX86596	TVAG_014540	1	0	-3.13467	0	1	0	1	0		0	0	0	0	0	0	0	0		1	1	1	1	1	1	1	1
EAX86598	TVAG_014550	1	0	-3.13467	0	1	0	1	0		0	0	0	0	0	0	0	0		1	1	1	1	1	1	1	1
EAX86599	TVAG_014560	1	0	-3.13467	0	1	0	1	0		0	0	0	0	0	0	0	0		1	1	1	1	1	1	1	1
EAX78307	TVAG_014580	1	0	-3.13467	0	1	0	1	0		0	0	0	0	0	0	0	0		1	1	1	1	1	1	1	1
EAX78308	TVAG_014590	1	0	-3.13467	0	1	0	1	0		0	0	0	0	0	0	0	0		1	1	1	1	1	1	1	1
EAX81376	TVAG_014600	1	0	-3.13467	0	1	0	1	0		0	0	0	0	0	0	0	0		1	1	1	1	1	1	1	1
EAX78406	TVAG_014620	1	0	-3.13467	0	1	0	1	0		0	0	0	0	0	0	0	0		1	1	1	1	1	1	1	1
EAX72664	TVAG_014630	1	0	-3.13467	0	1	0	1	0		0	0	0	0	0	0	0	0		1	1	1	1	1	1	1	1
EAX81762	TVAG_014650	1	0	-3.13467	0	1	0	1	0		0	0	0	0	0	0	0	0		1	1	1	1	1	1	1	1
EAX81763	TVAG_014660	1	0	-3.13467	0	1	0	1	0		0	0	0	0	0	0	0	0		1	1	1	1	1	1	1	1
EAX81764	TVAG_014680	1	0	-3.13467	0	1	0	1	0		0	0	0	0	0	0	0	0		1	1	1	1	1	1	1	1
EAX81765	TVAG_014690	1	0	-3.13467	0	1	0	1	0		0	0	0	0	0	0	0	0		1	1	1	1	1	1	1	1
EAX81766	TVAG_014700	1	0	-3.13467	0	1	0	1	0		0	0	0	0	0	0	0	0		1	1	1	1	1	1	1	1
EAX70026	TVAG_014730	1	0	-3.13467	0	1	0	1	0		0	0	0	0	0	0	0	0		1	1	1	1	1	1	1	1
EAX83141	TVAG_014740	1	0	-3.13467	0	1	0	1	0		0	0	0	0	0	0	0	0		1	1	1	1	1	1	1	1
EAX83142	TVAG_014750	1	0	-3.13467	0	1	0	1	0		0	0	0	0	0	0	0	0		1	1	1	1	1	1	1	1
EAX83143	TVAG_014760	1	0	-3.13467	0	1	0	1	0		0	0	0	0	0	0	0	0		1	1	1	1	1	1	1	1
EAX83144	TVAG_014770	1	0	-3.13467	0	1	0	1	0		0	0	0	0	0	0	0	0		1	1	1	1	1	1	1	1
EAX83298	TVAG_014830	1	0	-3.13467	0	1	0	1	0		0	0	0	0	0	0	0	0		1	1	1	1	1	1	1	1
EAX74660	TVAG_015050	1	0	-3.13467	0	1	0	1	0		0	0	0	0	0	0	0	0		1	1	1	1	1	1	1	1
EAX88492	TVAG_015070	1	0	-3.13467	0	1	0	1	0		0	0	0	0	0	0	0	0		1	1	1	1	1	1	1	1
EAX88493	TVAG_015080	1	0	-3.13467	0	1	0	1	0		0	0	0	0	0	0	0	0		1	1	1	1	1	1	1	1
EAX88494	TVAG_015090	1	0	-3.13467	0	1	0	1	0		0	0	0	0	0	0	0	0		1	1	1	1	1	1	1	1
EAX88497	TVAG_015100	1	0	-3.13467	0	1	0	1	0		0	0	0	0	0	0	0	0		1	1	1	1	1	1	1	1
EAX86301	TVAG_015180	1	0	-3.13467	0	1	0	1	0		0	0	0	0	0	0	0	0		1	1	1	1	1	1	1	1
EAX80039	TVAG_015190	1	0	-3.13467	0	1	0	1	0		0	0	0	0	0	0	0	0		1	1	1	1	1	1	1	1
EAX80040	TVAG_015200	1	0	-3.13467	0	1	0	1	0		0	0	0	0	0	0	0	0		1	1	1	1	1	1	1	1
EAX75095	TVAG_015210	1	0	-3.13467	0	1	0	1	0		0	0	0	0	0	0	0	0		1	1	1	1	1	1	1	1
EAX75096	TVAG_015220	1	0	-3.13467	0	1	0	1	0		0	0	0	0	0	0	0	0		1	1	1	1	1	1	1	1
EAX75098	TVAG_015230	1	0	-3.13467	0	1	0	1	0		0	0	0	0	0	0	0	0		1	1	1	1	1	1	1	1
EAX77258	TVAG_015240	1	0	-3.13467	0	1	0	1	0		0	0	0	0	0	0	0	0		1	1	1	1	1	1	1	1
EAX80317	TVAG_015350	1	0	-3.13467	0	1	0	1	0		0	0	0	0	0	0	0	0		1	1	1	1	1	1	1	1
EAX69977	TVAG_015650	1	0	-3.13467	0	1	0	1	0		0	0	0	0	0	0	0	0		1	1	1	1	1	1	1	1
EAX74973	TVAG_015660	1	0	-3.13467	0	1	0	1	0		0	0	0	0	0	0	0	0		1	1	1	1	1	1	1	1
EAX70220	TVAG_015670	1	0	-3.13467	0	1	0	1	0		0	0	0	0	0	0	0	0		1	1	1	1	1	1	1	1
EAX74329	TVAG_015690	1	0	-3.13467	0	1	0	1	0		0	0	0	0	0	0	0	0		1	1	1	1	1	1	1	1
EAX70722	TVAG_015720	1	0	-3.13467	0	1	0	1	0		0	0	0	0	0	0	0	0		1	1	1	1	1	1	1	1
EAX70826	TVAG_015730	1	0	-3.13467	0	1	0	1	0		0	0	0	0	0	0	0	0		1	1	1	1	1	1	1	1
EAX79162	TVAG_017010	1	0	-3.13467	0	1	0	1	0		0	0	0	0	0	0	0	0		1	1	1	1	1	1	1	1
EAX82100	TVAG_017020	1	0	-3.13467	0	1	0	1	0		0	0	0	0	0	0	0	0		1	1	1	1	1	1	1	1
EAX80520	TVAG_017040	1	0	-3.13467	0	1	0	1	0		0	0	0	0	0	0	0	0		1	1	1	1	1	1	1	1
EAX70374	TVAG_017050	1	0	-3.13467	0	1	0	1	0		0	0	0	0	0	0	0	0		1	1	1	1	1	1	1	1
EAX79397	TVAG_017060	1	0	-3.13467	0	1	0	1	0		0	0	0	0	0	0	0	0		1	1	1	1	1	1	1	1
EAX73534	TVAG_017070	1	0	-3.13467	0	1	0	1	0		0	0	0	0	0	0	0	0		1	1	1	1	1	1	1	1
EAX73535	TVAG_017080	1	0	-3.13467	0	1	0	1	0		0	0	0	0	0	0	0	0		1	1	1	1	1	1	1	1
EAX78886	TVAG_017090	1	0	-3.13467	0	1	0	1	0		0	0	0	0	0	0	0	0		1	1	1	1	1	1	1	1
EAX78887	TVAG_017100	1	0	-3.13467	0	1	0	1	0		0	0	0	0	0	0	0	0		1	1	1	1	1	1	1	1
EAX83493	TVAG_017110	1	0	-3.13467	0	1	0	1	0		0	0	0	0	0	0	0	0		1	1	1	1	1	1	1	1
EAX75751	TVAG_017120	1	0	-3.13467	0	1	0	1	0		0	0	0	0	0	0	0	0		1	1	1	1	1	1	1	1
EAX74366	TVAG_017130	1	0	-3.13467	0	1	0	1	0		0	0	0	0	0	0	0	0		1	1	1	1	1	1	1	1
EAX73279	TVAG_017140	1	0	-3.13467	0	1	0	1	0		0	0	0	0	0	0	0	0		1	1	1	1	1	1	1	1
EAX77210	TVAG_017150	1	0	-3.13467	0	1	0	1	0		0	0	0	0	0	0	0	0		1	1	1	1	1	1	1	1
EAX84392	TVAG_017160	1	0	-3.13467	0	1	0	1	0		0	0	0	0	0	0	0	0		1	1	1	1	1	1	1	1
EAX84393	TVAG_017170	1	0	-3.13467	0	1	0	1	0		0	0	0	0	0	0	0	0		1	1	1	1	1	1	1	1
EAX84395	TVAG_017180	1	0	-3.13467	0	1	0	1	0		0	0	0	0	0	0	0	0		1	1	1	1	1	1	1	1
EAX67409	TVAG_017190	1	0	-3.13467	0	1	0	1	0		0	0	0	0	0	0	0	0		1	1	1	1	1	1	1	1
EAX67410	TVAG_017200	1	0	-3.13467	0	1	0	1	0		0	0	0	0	0	0	0	0		1	1	1	1	1	1	1	1
EAX80311	TVAG_017210	1	0	-3.13467	0	1	0	1	0		0	0	0	0	0	0	0	0		1	1	1	1	1	1	1	1
EAX76190	TVAG_017240	1	0	-3.13467	0	1	0	1	0		0	0	0	0	0	0	0	0		1	1	1	1	1	1	1	1
EAX77094	TVAG_017250	1	0	-3.13467	0	1	0	1	0		0	0	0	0	0	0	0	0		1	1	1	1	1	1	1	1
EAX77095	TVAG_017260	1	0	-3.13467	0	1	0	1	0		0	0	0	0	0	0	0	0		1	1	1	1	1	1	1	1
EAX69737	TVAG_017270	1	0	-3.13467	0	1	0	1	0		0	0	0	0	0	0	0	0		1	1	1	1	1	1	1	1
EAX69738	TVAG_017280	1	0	-3.13467	0	1	0	1	0		0	0	0	0	0	0	0	0		1	1	1	1	1	1	1	1
EAX76126	TVAG_017300	1	0	-3.13467	0	1	0	1	0		0	0	0	0	0	0	0	0		1	1	1	1	1	1	1	1
EAX76127	TVAG_017310	1	0	-3.13467	0	1	0	1	0		0	0	0	0	0	0	0	0		1	1	1	1	1	1	1	1
EAX72891	TVAG_017580	1	0	-3.13467	0	1	0	1	0		0	0	0	0	0	0	0	0		1	1	1	1	1	1	1	1
EAX72892	TVAG_017590	1	0	-3.13467	0	1	0	1	0		0	0	0	0	0	0	0	0		1	1	1	1	1	1	1	1
EAX89393	TVAG_017600	1	0	-3.13467	0	1	0	1	0		0	0	0	0	0	0	0	0		1	1	1	1	1	1	1	1
EAX89394	TVAG_017620	1	0	-3.13467	0	1	0	1	0		0	0	0	0	0	0	0	0		1	1	1	1	1	1	1	1
EAX89395	TVAG_017630	1	0	-3.13467	0	1	0	1	0		0	0	0	0	0	0	0	0		1	1	1	1	1	1	1	1
EAX89401	TVAG_017640	1	0	-3.13467	0	1	0	1	0		0	0	0	0	0	0	0	0		1	1	1	1	1	1	1	1
EAX89403	TVAG_017710	1	0	-3.13467	0	1	0	1	0		0	0	0	0	0	0	0	0		1	1	1	1	1	1	1	1
EAX77367	TVAG_017720	1	0	-3.13467	0	1	0	1	0		0	0	0	0	0	0	0	0		1	1	1	1	1	1	1	1
EAX84954	TVAG_017730	1	0	-3.13467	0	1	0	1	0		0	0	0	0	0	0	0	0		1	1	1	1	1	1	1	1
EAX84733	TVAG_017760	1	0	-3.13467	0	1	0	1	0		0	0	0	0	0	0	0	0		1	1	1	1	1	1	1	1
EAX84734	TVAG_017770	1	0	-3.13467	0	1	0	1	0		0	0	0	0	0	0	0	0		1	1	1	1	1	1	1	1
EAX84735	TVAG_017780	1	0	-3.13467	0	1	0	1	0		0	0	0	0	0	0	0	0		1	1	1	1	1	1	1	1
EAX84736	TVAG_017790	1	0	-3.13467	0	1	0	1	0		0	0	0	0	0	0	0	0		1	1	1	1	1	1	1	1
EAX74017	TVAG_017800	1	0	-3.13467	0	1	0	1	0		0	0	0	0	0	0	0	0		1	1	1	1	1	1	1	1
EAX74019	TVAG_017810	1	0	-3.13467	0	1	0	1	0		0	0	0	0	0	0	0	0		1	1	1	1	1	1	1	1
EAX87133	TVAG_017820	1	0	-3.13467	0	1	0	1	0		0	0	0	0	0	0	0	0		1	1	1	1	1	1	1	1
EAX87134	TVAG_017830	1	0	-3.13467	0	1	0	1	0		0	0	0	0	0	0	0	0		1	1	1	1	1	1	1	1
EAX87135	TVAG_017840	1	0	-3.13467	0	1	0	1	0		0	0	0	0	0	0	0	0		1	1	1	1	1	1	1	1
EAX78389	TVAG_018090	1	0	-3.13467	0	1	0	1	0		0	0	0	0	0	0	0	0		1	1	1	1	1	1	1	1
EAX83624	TVAG_018100	1	0	-3.13467	0	1	0	1	0		0	0	0	0	0	0	0	0		1	1	1	1	1	1	1	1
EAX72317	TVAG_018110	1	0	-3.13467	0	1	0	1	0		0	0	0	0	0	0	0	0		1	1	1	1	1	1	1	1
EAX77096	TVAG_018120	1	0	-3.13467	0	1	0	1	0		0	0	0	0	0	0	0	0		1	1	1	1	1	1	1	1
EAX77097	TVAG_018130	1	0	-3.13467	0	1	0	1	0		0	0	0	0	0	0	0	0		1	1	1	1	1	1	1	1
EAX80909	TVAG_018540	1	0	-3.13467	0	1	0	1	0		0	0	0	0	0	0	0	0		1	1	1	1	1	1	1	1
EAX72507	TVAG_018550	1	0	-3.13467	0	1	0	1	0		0	0	0	0	0	0	0	0		1	1	1	1	1	1	1	1
EAX72508	TVAG_018560	1	0	-3.13467	0	1	0	1	0		0	0	0	0	0	0	0	0		1	1	1	1	1	1	1	1
EAX72509	TVAG_018570	1	0	-3.13467	0	1	0	1	0		0	0	0	0	0	0	0	0		1	1	1	1	1	1	1	1
EAX77058	TVAG_018580	1	0	-3.13467	0	1	0	1	0		0	0	0	0	0	0	0	0		1	1	1	1	1	1	1	1
EAX77059	TVAG_018590	1	0	-3.13467	0	1	0	1	0		0	0	0	0	0	0	0	0		1	1	1	1	1	1	1	1
EAX69792	TVAG_018610	1	0	-3.13467	0	1	0	1	0		0	0	0	0	0	0	0	0		1	1	1	1	1	1	1	1
EAX76843	TVAG_018620	1	0	-3.13467	0	1	0	1	0		0	0	0	0	0	0	0	0		1	1	1	1	1	1	1	1
EAX76844	TVAG_018630	1	0	-3.13467	0	1	0	1	0		0	0	0	0	0	0	0	0		1	1	1	1	1	1	1	1
EAX76845	TVAG_018640	1	0	-3.13467	0	1	0	1	0		0	0	0	0	0	0	0	0		1	1	1	1	1	1	1	1
EAX74149	TVAG_018650	1	0	-3.13467	0	1	0	1	0		0	0	0	0	0	0	0	0		1	1	1	1	1	1	1	1
EAX83516	TVAG_018670	1	0	-3.13467	0	1	0	1	0		0	0	0	0	0	0	0	0		1	1	1	1	1	1	1	1
EAX83517	TVAG_018680	1	0	-3.13467	0	1	0	1	0		0	0	0	0	0	0	0	0		1	1	1	1	1	1	1	1
EAX79438	TVAG_018690	1	0	-3.13467	0	1	0	1	0		0	0	0	0	0	0	0	0		1	1	1	1	1	1	1	1
EAX79439	TVAG_018700	1	0	-3.13467	0	1	0	1	0		0	0	0	0	0	0	0	0		1	1	1	1	1	1	1	1
EAX82025	TVAG_018710	1	0	-3.13467	0	1	0	1	0		0	0	0	0	0	0	0	0		1	1	1	1	1	1	1	1
EAX82026	TVAG_018730	1	0	-3.13467	0	1	0	1	0		0	0	0	0	0	0	0	0		1	1	1	1	1	1	1	1
EAX75316	TVAG_018740	1	0	-3.13467	0	1	0	1	0		0	0	0	0	0	0	0	0		1	1	1	1	1	1	1	1
EAX72579	TVAG_018750	1	0	-3.13467	0	1	0	1	0		0	0	0	0	0	0	0	0		1	1	1	1	1	1	1	1
EAX76453	TVAG_018760	1	0	-3.13467	0	1	0	1	0		0	0	0	0	0	0	0	0		1	1	1	1	1	1	1	1
EAX81506	TVAG_018770	1	0	-3.13467	0	1	0	1	0		0	0	0	0	0	0	0	0		1	1	1	1	1	1	1	1
EAX85031	TVAG_018780	1	0	-3.13467	0	1	0	1	0		0	0	0	0	0	0	0	0		1	1	1	1	1	1	1	1
EAX85033	TVAG_018790	1	0	-3.13467	0	1	0	1	0		0	0	0	0	0	0	0	0		1	1	1	1	1	1	1	1
EAX85037	TVAG_018800	1	0	-3.13467	0	1	0	1	0		0	0	0	0	0	0	0	0		1	1	1	1	1	1	1	1
EAX85038	TVAG_018810	1	0	-3.13467	0	1	0	1	0		0	0	0	0	0	0	0	0		1	1	1	1	1	1	1	1
EAX81654	TVAG_018820	1	0	-3.13467	0	1	0	1	0		0	0	0	0	0	0	0	0		1	1	1	1	1	1	1	1
EAX81655	TVAG_018830	1	0	-3.13467	0	1	0	1	0		0	0	0	0	0	0	0	0		1	1	1	1	1	1	1	1
EAX81713	TVAG_018850	1	0	-3.13467	0	1	0	1	0		0	0	0	0	0	0	0	0		1	1	1	1	1	1	1	1
EAX81714	TVAG_018860	1	0	-3.13467	0	1	0	1	0		0	0	0	0	0	0	0	0		1	1	1	1	1	1	1	1
EAX81715	TVAG_018870	1	0	-3.13467	0	1	0	1	0		0	0	0	0	0	0	0	0		1	1	1	1	1	1	1	1
EAX78847	TVAG_018890	1	0	-3.13467	0	1	0	1	0		0	0	0	0	0	0	0	0		1	1	1	1	1	1	1	1
EAX78848	TVAG_018900	1	0	-3.13467	0	1	0	1	0		0	0	0	0	0	0	0	0		1	1	1	1	1	1	1	1
EAX77916	TVAG_018990	1	0	-3.13467	0	1	0	1	0		0	0	0	0	0	0	0	0		1	1	1	1	1	1	1	1
EAX79462	TVAG_019030	1	0	-3.13467	0	1	0	1	0		0	0	0	0	0	0	0	0		1	1	1	1	1	1	1	1
EAX79463	TVAG_019040	1	0	-3.13467	0	1	0	1	0		0	0	0	0	0	0	0	0		1	1	1	1	1	1	1	1
[truncated: 58,877 more rows]
