# Supplementary material for: Identification of Trichomonas vaginalis 5-Nitroimidazole Resistance Targets
Source: Pathogens. 2023 May 10;12(5):692. doi: 10.3390/pathogens12050692 (PMC10223654; doi:10.3390/pathogens12050692)
Supplement: Supplementary file 1 [file pathogens-12-00692-s001.zip › Table_S3_304DysregulatedGenes.xlsx]

## Sheet: Sheet1
Table S3. 304 dysregulated genes																				*A constant value of 1 was added to each read count in order to avoid dividing by zero when calculating fold changes of each gene transcript between MTZ-R and MTZ-S T. vaginalis isolates.
Input ID	Gene ID	FC (R/S)	LOG2FC (R/S)	LOGCPM	LR	P-value	-LOG10(P-value)	FDR	-log10(FDR)		X1003	X1012	X904	X1021	X1073	X252	X4266	X4448		X1003	X1012	X904	X1021	X1073	X252	X4266	X4448
EAY03171	TVAG_345450	0.00686221	-7.18711	5.96422	53.0246	3.29389e-13	12.4823	2.00516e-08	7.69785		2737	3145.33	42.3333	2572	13.3333	5	17.6667	18.3333		2738	3146.33	43.3333	2573	14.3333	6	18.6667	19.3333
EAY23245	TVAG_185520	27.8644	4.80035	8.85973	34.9794	3.33212e-09	8.47728	0.000101421	3.99387		412	957.333	277.333	879.667	48517.3	2158.33	5384	14442.7		413	958.333	278.333	880.667	48518.3	2159.33	5385	14443.7
EAY06981	TVAG_174500	11.1488	3.47881	4.10661	30.5456	3.26118e-08	7.48663	0.000661748	3.17931		64.6667	16	37.6667	95	1063.67	108.333	657	590		65.6667	17	38.6667	96	1064.67	109.333	658	591
EAX93632	TVAG_003210	69	6.10852	1.78816	28.1251	1.13723e-07	6.94415	0.00173072	2.76177		1.33333	0.333333	0	2	240.667	18	265.667	0.666667		2.33333	1.33333	1	3	241.667	19	266.667	1.66667
EAY05221	TVAG_474000	0.0108992	-6.51964	6.43001	26.3687	2.82071e-07	6.54964	0.00343422	2.46417		44.6667	3267.67	5592	22	22.3333	8.33333	42	20.6667		45.6667	3268.67	5593	23	23.3333	9.33333	43	21.6667
EAY17161	TVAG_303800	99.2174	6.63252	2.32006	24.7608	6.49036e-07	6.18773	0.00658501	2.18144		1.66667	0	0.666667	1.33333	725.667	19	2.66667	9.33333		2.66667	1	1.66667	2.33333	726.667	20	3.66667	10.3333
EAY02342	TVAG_054400	0.0275229	-5.18322	0.2595	22.4191	2.19183e-06	5.65919	0.0148253	1.829		90	32.3333	0	19	0	0	0	0		91	33.3333	1	20	1	1	1	1
EAY03170	TVAG_345440	0.0702929	-3.83048	4.06759	22.4213	2.18933e-06	5.65969	0.0148253	1.829		969.667	50.3333	118.667	1247.33	46.3333	13.6667	48.6667	55.3333		970.667	51.3333	119.667	1248.33	47.3333	14.6667	49.6667	56.3333
EAX84566	TVAG_604680	0.026465	-5.23977	0.54391	22.4869	2.11581e-06	5.67452	0.0148253	1.829		0.333333	52.6667	50.6667	68.6667	0	0.666667	0	0		1.33333	53.6667	51.6667	69.6667	1	1.66667	1	1
EAX92297	TVAG_108140	0.0415512	-4.58896	0.0208536	21.0737	4.41952e-06	5.35462	0.0269039	1.57019		84	9	8	15.3333	0.666667	0	0.333333	0		85	10	9	16.3333	1.66667	1	1.33333	1
EAY07932	TVAG_064800	51	5.67243	0.33822	20.5982	5.66489e-06	5.24681	0.03135	1.50376		0	0	0	0	69.6667	0	1.33333	129		1	1	1	1	70.6667	1	2.33333	130
EAY08577	TVAG_191000	26.8355	4.74607	3.99121	20.3476	6.45724e-06	5.18995	0.032757	1.4847		4.33333	0	1.66667	67	1588	183.667	157.333	133.333		5.33333	1	2.66667	68	1589	184.667	158.333	134.333
EAY23363	TVAG_070260	0.0200927	-5.63718	0.858498	20.0696	7.46752e-06	5.12682	0.0349681	1.45633		148	62.3333	0	1.33333	0	0	0	0.333333		149	63.3333	1	2.33333	1	1	1	1.33333
EAY04250	TVAG_474560	32.3239	5.01453	3.30329	19.59	9.59716e-06	5.01786	0.0417305	1.37955		22.6667	2.33333	1.33333	17	1368	25	23.6667	109.333		23.6667	3.33333	2.33333	18	1369	26	24.6667	110.333
EAY21850	TVAG_249100	14.3741	3.8454	5.78613	18.4037	1.78713e-05	4.74784	0.0518055	1.28562		87.6667	55.6667	4.33333	121	100.333	1710	1954.33	150.667		88.6667	56.6667	5.33333	122	101.333	1711	1955.33	151.667
EAX87558	TVAG_340120	0.0234009	-5.41729	1.07018	18.4125	1.77885e-05	4.74986	0.0518055	1.28562		0	86.6667	122	1	0	0	1	0		1	87.6667	123	2	1	1	2	1
EAY20140	TVAG_020850	14.6492	3.87275	2.68959	18.43	1.76257e-05	4.75385	0.0518055	1.28562		19	9.33333	14.6667	16.6667	768.333	23	97.3333	40		20	10.3333	15.6667	17.6667	769.333	24	98.3333	41
EAY15854	TVAG_160270	60.25	5.91289	0.946147	18.5284	1.67395e-05	4.77626	0.0518055	1.28562		0	0	0.666667	0.666667	64	0.333333	252.667	0.333333		1	1	1.66667	1.66667	65	1.33333	253.667	1.33333
EAY17465	TVAG_494070	0.0659041	-3.92349	3.45447	18.5557	1.65011e-05	4.78249	0.0518055	1.28562		94.3333	1030.67	25.6667	69.3333	19.3333	7	33	17.3333		95.3333	1031.67	26.6667	70.3333	20.3333	8	34	18.3333
EAY02930	TVAG_040800	0.0568807	-4.13592	2.0535	18.614	1.60042e-05	4.79577	0.0518055	1.28562		150.667	27	118	245.333	0.333333	1.66667	25	0		151.667	28	119	246.333	1.33333	2.66667	26	1
EAY19120	TVAG_190140	0.031517	-4.98773	4.95718	18.8804	1.39174e-05	4.85644	0.0518055	1.28562		70.3333	3340.33	43.6667	53	29.6667	5.33333	15	56.6667		71.3333	3341.33	44.6667	54	30.6667	6.33333	16	57.6667
EAY09792	TVAG_137840	23.3314	4.5442	3.01631	17.8379	2.40542e-05	4.61881	0.0522965	1.28153		3.33333	41	1.66667	7.33333	406.667	6	568.333	352.667		4.33333	42	2.66667	8.33333	407.667	7	569.333	353.667
EAX89383	TVAG_121270	24	4.58496	0.6295	17.8411	2.40137e-05	4.61954	0.0522965	1.28153		0	0	0.333333	1.33333	4.66667	45	82	0.333333		1	1	1.33333	2.33333	5.66667	46	83	1.33333
EAX96158	TVAG_270460	0.0382409	-4.70874	0.446709	17.9524	2.26494e-05	4.64494	0.0522965	1.28153		81.3333	0	26.3333	62.6667	0.333333	0.333333	0.333333	1.66667		82.3333	1	27.3333	63.6667	1.33333	1.33333	1.33333	2.66667
EAY04445	TVAG_396320	0.0110821	-6.49562	3.7561	17.9694	2.24479e-05	4.64882	0.0522965	1.28153		1.33333	1508.33	18	2.33333	4.66667	1	0.666667	6.66667		2.33333	1509.33	19	3.33333	5.66667	2	1.66667	7.66667
EAX94977	TVAG_205750	0.0649282	-3.94501	2.37717	18.0248	2.1804e-05	4.66146	0.0522965	1.28153		234	197.333	72	119	34.6667	0	2	0		235	198.333	73	120	35.6667	1	3	1
EAX94814	TVAG_103830	0.0415412	-4.58931	2.24854	18.1324	2.06065e-05	4.68599	0.0522965	1.28153		0	203	197.333	149.333	5.33333	0.333333	0.333333	13		1	204	198.333	150.333	6.33333	1.33333	1.33333	14
EAX98268	TVAG_090440	0.0157264	-5.99067	3.89958	18.1948	1.99428e-05	4.70021	0.0522965	1.28153		8.33333	1671.33	5.66667	6.33333	8	0.666667	4	10		9.33333	1672.33	6.66667	7.33333	9	1.66667	5	11
EAX91235	TVAG_210600	0.0233054	-5.42319	4.55904	17.6312	2.68146e-05	4.57163	0.0562875	1.24959		50	2508.33	79.6667	18.3333	48.3333	2.66667	2.33333	4.66667		51	2509.33	80.6667	19.3333	49.3333	3.66667	3.33333	5.66667
EAY18346	TVAG_254580	0.00368565	-8.08387	4.82759	17.5531	2.79399e-05	4.55377	0.0566947	1.24646		0	81.6667	2716.67	1.33333	0	2.33333	3	1		1	82.6667	2717.67	2.33333	1	3.33333	4	2
EAX97211	TVAG_218250	12.4255	3.63524	3.13597	17.4529	2.94509e-05	4.5309	0.0578331	1.23782		1.66667	41.3333	25.3333	6	484.667	138.333	232.333	114		2.66667	42.3333	26.3333	7	485.667	139.333	233.333	115
EAX95115	TVAG_033350	0.108527	-3.20387	-1.20619	16.7583	4.24569e-05	4.37205	0.0783202	1.10613		13.6667	9	10	6.33333	0.666667	0	0	0		14.6667	10	11	7.33333	1.66667	1	1	1
EAY02340	TVAG_054380	0.0469314	-4.4133	-0.410361	16.5786	4.66744e-05	4.33092	0.0811801	1.09055		51	10.6667	0	26.6667	0	0	0	0.333333		52	11.6667	1	27.6667	1	1	1	1.33333
EAX85477	TVAG_242020	12.7046	3.66728	4.50018	16.6015	4.61149e-05	4.33616	0.0811801	1.09055		29.6667	60.6667	7.33333	56.3333	26	568.667	1321	87.6667		30.6667	61.6667	8.33333	57.3333	27	569.667	1322	88.6667
EAX96440	TVAG_284100	0.0743534	-3.74946	1.56408	16.5012	4.86204e-05	4.31318	0.0822158	1.08504		9.66667	200.333	77.6667	17.6667	9.66667	2.66667	4.66667	2		10.6667	201.333	78.6667	18.6667	10.6667	3.66667	5.66667	3
EAY20073	TVAG_365810	0.119587	-3.06387	5.59727	16.3967	5.13737e-05	4.28926	0.0845236	1.07302		867	563.667	2585.67	1275.67	21.6667	34.3333	503	70.3333		868	564.667	2586.67	1276.67	22.6667	35.3333	504	71.3333
EAY21242	TVAG_166170	0.0526316	-4.24793	0.682803	15.893	6.70273e-05	4.17375	0.0971496	1.01256		77.3333	18.3333	1	127.333	1.66667	0	5.66667	0.666667		78.3333	19.3333	2	128.333	2.66667	1	6.66667	1.66667
EAY18460	TVAG_083130	19.2917	4.26991	0.320748	15.9002	6.6773e-05	4.1754	0.0971496	1.01256		0.666667	0.666667	0.333333	2.33333	2.66667	18	123.667	6		1.66667	1.66667	1.33333	3.33333	3.66667	19	124.667	7
EAY19290	TVAG_452040	0.0816901	-3.61369	-0.0629912	15.9218	6.60152e-05	4.18036	0.0971496	1.01256		21.6667	16.3333	18.6667	57.6667	0	0.333333	0.666667	4.66667		22.6667	17.3333	19.6667	58.6667	1	1.33333	1.66667	5.66667
EAY02341	TVAG_054390	0.046595	-4.42368	-0.367755	15.9219	6.60119e-05	4.18038	0.0971496	1.01256		54.6667	12.6667	0	21.6667	0	0.333333	0	0		55.6667	13.6667	1	22.6667	1	1.33333	1	1
EAY16200	TVAG_340940	0.0197531	-5.66178	4.16546	15.997	6.3443e-05	4.19762	0.0971496	1.01256		2.66667	3.33333	1726	19	11.3333	3	10.6667	5.66667		3.66667	4.33333	1727	20	12.3333	4	11.6667	6.66667
EAY16199	TVAG_340930	0.0208547	-5.58348	3.32143	15.2951	9.1957e-05	4.03642	0.109903	0.95899		1	3.33333	956.667	10	5.66667	2	7.66667	1		2	4.33333	957.667	11	6.66667	3	8.66667	2
EAY15853	TVAG_160260	27.7059	4.79212	0.0411247	15.3048	9.1486e-05	4.03865	0.109903	0.95899		0.333333	0	0	1.33333	36.3333	1.33333	114.667	0.666667		1.33333	1	1	2.33333	37.3333	2.33333	115.667	1.66667
EAX90910	TVAG_469850	0.0534351	-4.22607	2.27333	15.3957	8.71881e-05	4.05954	0.109903	0.95899		381.333	162	4	16.3333	3	5.66667	10	7.66667		382.333	163	5	17.3333	4	6.66667	11	8.66667
EAX98960	TVAG_321200	0.0353982	-4.82018	0.944088	15.4473	8.48373e-05	4.07141	0.109903	0.95899		0	30.3333	152	2	1	0	1.66667	0		1	31.3333	153	3	2	1	2.66667	1
EAY02082	TVAG_485170	13.0085	3.70139	2.22686	15.4513	8.46573e-05	4.07234	0.109903	0.95899		18.6667	1	0.666667	14.6667	356.333	79.6667	60	7.33333		19.6667	2	1.66667	15.6667	357.333	80.6667	61	8.33333
EAX66281	TVAG_522320	0.0257426	-5.2797	0.475418	15.548	8.04378e-05	4.09454	0.109903	0.95899		160.333	0	1.33333	2.66667	0.333333	0	0	0		161.333	1	2.33333	3.66667	1.33333	1	1	1
EAY16201	TVAG_340950	0.0381212	-4.71326	2.33198	15.2046	9.64687e-05	4.01561	0.110803	0.95545		1.66667	2.66667	466.333	15	4.66667	1.33333	5	3.66667		2.66667	3.66667	467.333	16	5.66667	2.33333	6	4.66667
EAX87944	TVAG_349060	0.0533808	-4.22754	-0.333305	14.9458	0.000110643	3.95608	0.122461	0.912001		13	0	35.3333	41.3333	0	0	1	0		14	1	36.3333	42.3333	1	1	2	1
EAX94976	TVAG_205740	0.0869658	-3.52341	3.86662	14.6499	0.000129439	3.88794	0.12709	0.895889		245.333	551.667	617	149.667	118.333	0.333333	12	1.66667		246.333	552.667	618	150.667	119.333	1.33333	13	2.66667
EAX93785	TVAG_339080	23.0986	4.52973	3.24131	14.6737	0.000127815	3.89342	0.12709	0.895889		11	9.66667	4.66667	41.6667	6.66667	3.33333	1297.33	328.667		12	10.6667	5.66667	42.6667	7.66667	4.33333	1298.33	329.667
EAY22465	TVAG_034880	0.0614806	-4.02373	1.2579	14.7179	0.000124857	3.90359	0.12709	0.895889		34	206.333	5	16.3333	1	1	10	0.333333		35	207.333	6	17.3333	2	2	11	1.33333
EAY23759	TVAG_120970	0.118879	-3.07243	4.55516	14.7324	0.000123896	3.90694	0.12709	0.895889		128	134	1839.67	202	69	5.66667	168.667	27		129	135	1840.67	203	70	6.66667	169.667	28
EAX91545	TVAG_422400	64.2667	6.006	0.915367	14.5553	0.000136103	3.86613	0.131512	0.881035		0	0	0.333333	0.666667	1.33333	0	315.667	0.333333		1	1	1.33333	1.66667	2.33333	1	316.667	1.33333
EAX98504	TVAG_354420	67.8	6.08321	0.984377	14.4185	0.000146355	3.83459	0.13499	0.869698		0	1	0	0	0.666667	1.66667	0	332.667		1	2	1	1	1.66667	2.66667	1	333.667
EAY08083	TVAG_497060	8.99476	3.16909	2.79398	14.4442	0.000144375	3.84051	0.13499	0.869698		41	2	10.6667	6	146.667	178.667	17	226.333		42	3	11.6667	7	147.667	179.667	18	227.333
EAX92046	TVAG_441090	0.0130674	-6.25789	5.432	14.252	0.000159888	3.79618	0.135183	0.869078		30.6667	13	21.6667	8119	46	21	20.6667	15.3333		31.6667	14	22.6667	8120	47	22	21.6667	16.3333
EAX94102	TVAG_336650	26.0217	4.70165	1.25096	14.2598	0.000159227	3.79798	0.135183	0.869078		2	2	0.333333	7	0.333333	1.66667	202	191		3	3	1.33333	8	1.33333	2.66667	203	192
EAX90370	TVAG_036820	9.01633	3.17254	2.30145	14.2659	0.000158718	3.79937	0.135183	0.869078		14	0	8.33333	55.3333	86.3333	18.3333	317	310.667		15	1	9.33333	56.3333	87.3333	19.3333	318	311.667
EAX89861	TVAG_302980	15.5964	3.96314	3.82142	14.2737	0.000158059	3.80118	0.135183	0.869078		11.3333	19	1.33333	38.6667	4.33333	397	744.333	9.66667		12.3333	20	2.33333	39.6667	5.33333	398	745.333	10.6667
EAY19297	TVAG_452110	0.0918367	-3.44478	0.397677	14.3063	0.000155344	3.80871	0.135183	0.869078		27	10.6667	81.6667	7.33333	0.333333	0.333333	4	3.33333		28	11.6667	82.6667	8.33333	1.33333	1.33333	5	4.33333
EAX90028	TVAG_411680	26.8947	4.74925	0.477992	14.2239	0.000162298	3.78969	0.135341	0.86857		0	0	0	2.33333	0	23.3333	2.66667	140.333		1	1	1	3.33333	1	24.3333	3.66667	141.333
EAY02538	TVAG_494870	0.0159341	-5.97174	2.27184	14.037	0.00017925	3.74654	0.139895	0.854196		598.667	1.33333	1.66667	1	0.666667	1.66667	3	0.333333		599.667	2.33333	2.66667	2	1.66667	2.66667	4	1.33333
EAY14615	TVAG_393430	22.7895	4.5103	1.13352	14.062	0.000176879	3.75232	0.139895	0.854196		0	2.33333	0	0	1.33333	79.6667	59.3333	0		1	3.33333	1	1	2.33333	80.6667	60.3333	1
EAX95112	TVAG_033320	17.5	4.12928	0.285426	14.0788	0.000175312	3.75619	0.139895	0.854196		0	0.333333	1.33333	3.66667	135.667	7	12	4.66667		1	1.33333	2.33333	4.66667	136.667	8	13	5.66667
EAX87365	TVAG_015280	0.0573477	-4.12412	-0.313125	14.1003	0.000173312	3.76117	0.139895	0.854196		0	26.6667	24.6667	37.6667	1	0.333333	0	0		1	27.6667	25.6667	38.6667	2	1.33333	1	1
EAY01540	TVAG_217780	0.0744412	-3.74775	3.40625	13.9736	0.000185394	3.73191	0.141073	0.850556		296.667	17.6667	21.3333	1375.33	43.3333	4	62	14.3333	13.8356	297.667	18.6667	22.3333	1376.33	44.3333	5	63	15.3333
EAY01077	TVAG_484510	0.00951684	-6.7153	3.21744	13.9175	0.000191015	3.71893	0.143556	0.842978		0	0.333333	905.667	0.666667	0	0.333333	4	0.333333		1	1.33333	906.667	1.66667	1	1.33333	5	1.33333
EAY00432	TVAG_084690	59.4211	5.8929	1.13919	13.6821	0.000216505	3.66453	0.158792	0.799172		0.666667	0.666667	1	0	0.333333	0.333333	370	1.66667		1.66667	1.66667	2	1	1.33333	1.33333	371	2.66667
EAY04693	TVAG_474910	0.0713542	-3.80886	2.71753	13.5216	0.000235835	3.62739	0.166936	0.777451		13.3333	3.66667	586.667	32.3333	16	0.333333	19.6667	5.66667		14.3333	4.66667	587.667	33.3333	17	1.33333	20.6667	6.66667
EAY13201	TVAG_097710	0.0601052	-4.05637	2.02729	13.5397	0.000233567	3.63159	0.166936	0.777451		7.33333	417	10	5.33333	12	1.33333	4.33333	5		8.33333	418	11	6.33333	13	2.33333	5.33333	6
EAY15960	TVAG_262100	0.0992908	-3.3322	-1.2466	13.4872	0.000240192	3.61944	0.168065	0.774522		16.6667	0.666667	5.66667	20	0	0	0.666667	0		17.6667	1.66667	6.66667	21	1	1	1.66667	1
EAX97600	TVAG_162060	57.7692	5.85223	0.701672	13.4419	0.000246069	3.60894	0.170221	0.768986		0.333333	0	0	0	246	0.333333	0	0		1.33333	1	1	1	247	1.33333	1	1
EAY04146	TVAG_125860	0.0209677	-5.57568	1.10162	13.391	0.000252828	3.59717	0.172931	0.762126		0	0	202.667	0	0	0	0.333333	0		1	1	203.667	1	1	1	1.33333	1
EAX83738	TVAG_041480	51.7407	5.69323	1.41127	13.3463	0.00025893	3.58682	0.175137	0.756622		0.333333	0	2	2.66667	1.33333	0.333333	2.33333	457.667		1.33333	1	3	3.66667	2.33333	1.33333	3.33333	458.667
EAY04511	TVAG_453290	8.47706	3.08356	3.32704	13.2586	0.000271333	3.5665	0.177607	0.750541		23.3333	14	53	51	219	112.333	875.667	21		24.3333	15	54	52	220	113.333	876.667	22
EAX91183	TVAG_287070	15.9167	3.99247	-0.532335	13.2652	0.000270381	3.56802	0.177607	0.750541		0	0	0	0	42	17.3333	0.333333	0		1	1	1	1	43	18.3333	1.33333	1
EAY03760	TVAG_072530	20.9744	4.39055	3.14147	13.2808	0.000268144	3.57163	0.177607	0.750541		1.33333	16.3333	38.3333	5	1079.67	11	87	181.667		2.33333	17.3333	39.3333	6	1080.67	12	88	182.667
EAY17309	TVAG_266720	12.6905	3.66567	0.309304	13.219	0.000277127	3.55732	0.179469	0.74601		0.666667	0	0	9.33333	20.3333	6.33333	33	114		1.66667	1	1	10.3333	21.3333	7.33333	34	115
EAY13915	TVAG_028680	0.0464481	-4.42824	0.269403	13.1585	0.000286223	3.54329	0.17981	0.745186		0	70.3333	46.3333	1.33333	0	0.333333	1.33333	0		1	71.3333	47.3333	2.33333	1	1.33333	2.33333	1
EAY02346	TVAG_054440	0.0211268	-5.56478	0.785791	13.1885	0.000281673	3.55025	0.17981	0.745186		0	185.333	0	0	0	0	0	0		1	186.333	1	1	1	1	1	1
EAY19031	TVAG_247100	0.106106	-3.23643	6.2088	13.0659	0.000300729	3.52183	0.186805	0.728612		196.333	190.667	6364	326	161	28	98	460.333		197.333	191.667	6365	327	162	29	99	461.333
EAY03148	TVAG_345220	0.0273973	-5.18982	0.683955	12.8805	0.000332017	3.47884	0.196696	0.706206		186.667	4	0	0	0.666667	0	0	0.666667		187.667	5	1	1	1.66667	1	1	1.66667
EAX92544	TVAG_074270	0.0446927	-4.48382	1.68286	12.8872	0.000330837	3.48039	0.196696	0.706206		5	335	0	14	3.33333	0.333333	7.33333	1		6	336	1	15	4.33333	1.33333	8.33333	2
EAY08439	TVAG_354980	12.2429	3.61387	0.985516	12.8913	0.000330113	3.48134	0.196696	0.706206		2.66667	4.33333	1.66667	10.6667	225	3.33333	41.6667	11.6667		3.66667	5.33333	2.66667	11.6667	226	4.33333	42.6667	12.6667
EAY03126	TVAG_328990	104.417	6.70621	6.50941	12.9358	0.000322354	3.49167	0.196696	0.706206		24.6667	0	1.66667	5.66667	0	3747.67	0.666667	6.66667		25.6667	1	2.66667	6.66667	1	3748.67	1.66667	7.66667
EAX79595	TVAG_473690	0.10233	-3.28869	3.30902	12.8208	0.000342786	3.46498	0.200645	0.697571		4	73.6667	779	126.333	14	4	66	13		5	74.6667	780	127.333	15	5	67	14
EAX93943	TVAG_307220	9.6502	3.27056	4.61152	12.7765	0.000350998	3.4547	0.203495	0.691446		148	20	17	60.6667	42	512	1769.33	82		149	21	18	61.6667	43	513	1770.33	83
EAX72342	TVAG_244160	0.027146	-5.20312	1.36669	12.7229	0.000361211	3.44224	0.207441	0.683106		2.33333	6.66667	0.666667	440.667	1.66667	1.66667	2.33333	2.66667		3.33333	7.66667	1.66667	441.667	2.66667	2.66667	3.33333	3.66667
EAX90574	TVAG_376300	0.0591806	-4.07873	1.21269	12.4033	0.000428583	3.36797	0.232946	0.632745		3.66667	6.66667	204.667	0.666667	2.66667	0.666667	4.66667	1		4.66667	7.66667	205.667	1.66667	3.66667	1.66667	5.66667	2
EAY05716	TVAG_100390	0.058309	-4.10014	0.26876	12.3781	0.000434388	3.36212	0.234012	0.630761		0.666667	12	96	1.66667	0.333333	0.333333	2	0		1.66667	13	97	2.66667	1.33333	1.33333	3	1
EAY05326	TVAG_153600	0.0875912	-3.51307	-1.14576	12.3357	0.000444388	3.35224	0.235236	0.628497		22.6667	18.3333	0	0.666667	0	0	0	0		23.6667	19.3333	1	1.66667	1	1	1	1
EAX73365	TVAG_550840	0.0875399	-3.51391	2.38588	12.3515	0.000440631	3.35592	0.235236	0.628497		10.3333	5	423.333	79	16	4.33333	18	3.33333		11.3333	6	424.333	80	17	5.33333	19	4.33333
EAY18888	TVAG_295410	0.0586767	-4.09107	2.4622	12.2715	0.00045992	3.33732	0.241359	0.617337		3	0.333333	503.667	23	10.6667	1	6.66667	9		4	1.33333	504.667	24	11.6667	2	7.66667	10
EAY06209	TVAG_470520	0.0784103	-3.67281	1.62087	12.2369	0.000468547	3.32925	0.243785	0.612994		0.333333	46.3333	225.667	34	0.333333	0	4	16		1.33333	47.3333	226.667	35	1.33333	1	5	17
EAY05325	TVAG_153590	0.0985915	-3.34239	-1.09286	12.2012	0.000477587	3.32095	0.246382	0.60839		23.3333	17.6667	1	1.33333	0	0	0.333333	0.333333		24.3333	18.6667	2	2.33333	1	1	1.33333	1.33333
EAY02008	TVAG_217450	48.75	5.60733	0.252902	12.1342	0.000495067	3.30534	0.251143	0.600079		0	0	0	0	0	0	191	0		1	1	1	1	1	1	192	1
EAY16233	TVAG_341270	0.0940584	-3.4103	4.06521	12.1359	0.000494608	3.30574	0.251143	0.600079		61	23.3333	1431	68.3333	22.3333	18.3333	48	56.6667		62	24.3333	1432	69.3333	23.3333	19.3333	49	57.6667
EAY08094	TVAG_497170	0.106122	-3.2362	2.57357	12.1136	0.00050056	3.30054	0.251831	0.598891		22	531.667	25.3333	70.3333	50.6667	2.66667	7	5		23	532.667	26.3333	71.3333	51.6667	3.66667	8	6
EAY12791	TVAG_401170	0.0610329	-4.03427	-0.540589	12.0348	0.000522157	3.2822	0.258425	0.587665		0.333333	63.6667	0.666667	2.33333	0	0	0.333333	0		1.33333	64.6667	1.66667	3.33333	1	1	1.33333	1
EAX92135	TVAG_419400	15.3807	3.94305	4.85279	11.9943	0.000533639	3.27275	0.261978	0.581735		16	132.333	7.66667	58	2842.67	402.667	88	15.6667		17	133.333	8.66667	59	2843.67	403.667	89	16.6667
EAY11633	TVAG_158580	0.072361	-3.78864	3.18548	11.8401	0.000579688	3.23681	0.277862	0.55617		896.333	36.3333	2	236	1.33333	5	45.3333	29.3333		897.333	37.3333	3	237	2.33333	6	46.3333	30.3333
EAX89537	TVAG_061430	32.8824	5.03924	0.188279	11.7006	0.000624808	3.20425	0.294846	0.530404		0.333333	0	0.333333	1	0	0	6.66667	175.667		1.33333	1	1.33333	2	1	1	7.66667	176.667
EAX92989	TVAG_261680	22.2	4.47249	0.0402118	11.6171	0.000653496	3.18476	0.303676	0.51759		0.666667	1.33333	0.333333	0.333333	128.667	0.666667	14.3333	0.333333		1.66667	2.33333	1.33333	1.33333	129.667	1.66667	15.3333	1.33333
EAX85789	TVAG_408550	0.0233645	-5.41954	0.963116	11.5664	0.000671528	3.17294	0.307363	0.512349		0	210	0	0	0	0.333333	0.333333	0.333333		1	211	1	1	1	1.33333	1.33333	1.33333
EAX88508	TVAG_587490	8.03084	3.00555	2.13214	11.519	0.000688875	3.16186	0.308348	0.510959		16	39.6667	6	10	180.333	17	361.333	45		17	40.6667	7	11	181.333	18	362.333	46
EAY10662	TVAG_157390	0.117994	-3.08321	-0.00308163	11.451	0.000714543	3.14597	0.314495	0.502386		25.3333	45.6667	7.33333	30.6667	0.333333	0	0.666667	8.33333		26.3333	46.6667	8.33333	31.6667	1.33333	1	1.66667	9.33333
EAY01557	TVAG_217950	0.0930576	-3.42573	1.22855	11.4635	0.000709782	3.14888	0.314495	0.502386		4	3	193.333	21.3333	2.33333	1.66667	6.66667	6.33333		5	4	194.333	22.3333	3.33333	2.66667	7.66667	7.33333
EAX86689	TVAG_300370	12.2	3.60881	-0.87273	11.3761	0.000743969	3.12845	0.321199	0.493225		0	1	0	0	15.3333	7.66667	0	34		1	2	1	1	16.3333	8.66667	1	35
EAX92823	TVAG_448200	0.0233577	-5.41996	0.424818	11.318	0.000767609	3.11486	0.326771	0.485757		5.33333	0	0	219	0	0.666667	0.333333	0.333333		6.33333	1	1	220	1	1.66667	1.33333	1.33333
EAX91955	TVAG_375820	33.5385	5.06774	0.877572	11.2518	0.000795471	3.09938	0.329417	0.482254		4.33333	0	0.333333	0	173	0	113.333	0.333333		5.33333	1	1.33333	1	174	1	114.333	1.33333
EAX85619	TVAG_036500	0.0555925	-4.16896	3.066	11.2607	0.000791672	3.10145	0.329417	0.482254		757.333	230.667	0	9.33333	4.33333	5	36	6.33333		758.333	231.667	1	10.3333	5.33333	6	37	7.33333
EAY16717	TVAG_067220	0.08	-3.64386	-0.888111	11.2717	0.000786966	3.10404	0.329417	0.482254		15.6667	0	7.33333	39.6667	0	0.333333	0.333333	0.666667		16.6667	1	8.33333	40.6667	1	1.33333	1.33333	1.66667
EAX88159	TVAG_095820	15.8421	3.98569	-0.200531	11.2809	0.00078308	3.10619	0.329417	0.482254		0	0	0	2.33333	0.333333	14.6667	80	1.33333		1	1	1	3.33333	1.33333	15.6667	81	2.33333
EAY01267	TVAG_027350	44.2857	5.46877	0.447052	11.1703	0.000831155	3.08032	0.335077	0.474856		0.333333	0.333333	0	0	202.667	0	0	0		1.33333	1.33333	1	1	203.667	1	1	1
EAY13414	TVAG_424460	13.4146	3.74574	0.303276	11.1715	0.00083065	3.08058	0.335077	0.474856		4	1.66667	0.333333	3.66667	3.66667	3.66667	22	150		5	2.66667	1.33333	4.66667	4.66667	4.66667	23	151
EAY08656	TVAG_240170	0.057716	-4.11488	3.13168	11.1948	0.000820274	3.08604	0.335077	0.474856		1019	29	0	28	8.33333	4.66667	22.6667	22.6667		1020	30	1	29	9.33333	5.66667	23.6667	23.6667
EAY21935	TVAG_249950	27.0857	4.75946	1.05091	11.0851	0.00087022	3.06037	0.343991	0.463452		3	0.666667	2	2	307.333	0.333333	1	3.33333		4	1.66667	3	3	308.333	1.33333	2	4.33333
EAX98691	TVAG_333550	0.0980861	-3.34981	2.12578	11.0854	0.000870089	3.06044	0.343991	0.463452		11.3333	8.66667	366.333	27.6667	0.333333	3	19	14.6667		12.3333	9.66667	367.333	28.6667	1.33333	4	20	15.6667
EAY04530	TVAG_244310	10.2857	3.36257	-1.18649	10.9363	0.00094299	3.02549	0.361318	0.442111		0	0.333333	0	0.333333	34.6667	4.33333	0	5		1	1.33333	1	1.33333	35.6667	5.33333	1	6
EAY19453	TVAG_101710	9.72727	3.28204	1.10106	10.8507	0.000987565	3.00543	0.366573	0.435839		11.3333	0.333333	0.666667	9.33333	3	32.6667	185.667	24.3333		12.3333	1.33333	1.66667	10.3333	4	33.6667	186.667	25.3333
EAY01335	TVAG_407640	14.1765	3.82543	1.07757	10.8582	0.000983583	3.00719	0.366573	0.435839		1.33333	3.66667	0.666667	13	188.333	2	1	126		2.33333	4.66667	1.66667	14	189.333	3	2	127
EAY18408	TVAG_046110	0.0402685	-4.63421	-0.0895927	10.8065	0.00101145	2.99505	0.373165	0.428099		0	95.3333	0	0	0	0	0	0		1	96.3333	1	1	1	1	1	1
EAX90885	TVAG_TEG_DS114076_2_2	16.2667	4.02385	-0.785351	10.7181	0.00106094	2.97431	0.377689	0.422866		1	0	0	0	0	1	34.6667	41.6667		2	1	1	1	1	2	35.6667	42.6667
EAY16802	TVAG_447610	0.0370899	-4.75283	1.29223	10.7391	0.00104897	2.97924	0.377689	0.422866		0	0.333333	229.333	0	1	0.333333	1.66667	1.66667		1	1.33333	230.333	1	2	1.33333	2.66667	2.66667
EAY15830	TVAG_160030	11.7756	3.55773	2.00041	10.6784	0.00108394	2.96499	0.381417	0.4186		11.6667	1	3.33333	32	429	1.66667	166.667	11		12.6667	2	4.33333	33	430	2.66667	167.667	12
EAX83508	TVAG_231910	0.0518205	-4.27033	4.26549	10.6224	0.00111723	2.95186	0.390871	0.407966		2213.33	0.333333	43	183.667	1.33333	2.66667	96	22.6667		2214.33	1.33333	44	184.667	2.33333	3.66667	97	23.6667
EAY16196	TVAG_340900	0.0808271	-3.62902	0.904834	10.5611	0.0011549	2.93746	0.397201	0.400989		0	24	144.667	4.66667	1	1.33333	4	4		1	25	145.667	5.66667	2	2.33333	5	5
EAY11118	TVAG_358970	45.0455	5.49331	1.92448	10.5692	0.00114989	2.93934	0.397201	0.400989		1	2.33333	0	7.33333	0	1	655.333	0.333333		2	3.33333	1	8.33333	1	2	656.333	1.33333
EAY20699	TVAG_163950	0.0223917	-5.48089	5.85136	10.4979	0.00119513	2.92258	0.404187	0.393418		12	19.3333	17.3333	10784.7	140.333	37.3333	25.3333	35.6667		13	20.3333	18.3333	10785.7	141.333	38.3333	26.3333	36.6667
EAY07379	TVAG_204860	0.045283	-4.46489	-0.245052	10.4448	0.00122996	2.91011	0.411394	0.385742		0	84.3333	0	0	0	0	0	0		1	85.3333	1	1	1	1	1	1
EAY22497	TVAG_035200	0.0669856	-3.9	0.555601	10.4105	0.00125299	2.90205	0.416809	0.380063		0.666667	0.666667	128.667	5.33333	0	0.333333	3	2		1.66667	1.66667	129.667	6.33333	1	1.33333	4	3
EAX96083	TVAG_063860	0.097561	-3.35755	-1.11943	10.3918	0.00126573	2.89766	0.418758	0.378037		0	8	29	0	0	0	0	0		1	9	30	1	1	1	1	1
EAY08326	TVAG_352480	12.1538	3.60334	0.100064	10.3373	0.00130369	2.88483	0.42233	0.374348		0	0	0.333333	0	0	48.6667	0	0		1	1	1.33333	1	1	49.6667	1	1
EAY19256	TVAG_214810	0.0585366	-4.09452	0.531346	10.353	0.00129264	2.88852	0.42233	0.374348		0	0.333333	129.667	2.66667	1	0	2.33333	0.666667		1	1.33333	130.667	3.66667	2	1	3.33333	1.66667
EAY18587	TVAG_462730	28.7037	4.84316	0.780931	10.2859	0.00134049	2.87273	0.427239	0.369329		0	0	2.66667	2.33333	251	1	0.666667	1.66667		1	1	3.66667	3.33333	252	2	1.66667	2.66667
EAX91295	TVAG_397960	0.0821444	-3.60569	2.85018	10.2412	0.00137335	2.86222	0.42942	0.367118		13.6667	650.333	95.6667	7.33333	26.6667	0	32.6667	0		14.6667	651.333	96.6667	8.33333	27.6667	1	33.6667	1
EAX81508	TVAG_091710	0.0703518	-3.82927	0.296585	10.2466	0.00136938	2.86347	0.42942	0.367118		16.3333	104	0	8.33333	0.666667	0.666667	4	0		17.3333	105	1	9.33333	1.66667	1.66667	5	1
EAX91906	TVAG_326500	0.0447284	-4.48266	-0.155222	10.263	0.00135723	2.86735	0.42942	0.367118		99.3333	0	0	1	0	0	0.666667	0		100.333	1	1	2	1	1	1.66667	1
EAX85729	TVAG_576580	0.112474	-3.15233	0.807918	10.1362	0.00145386	2.83748	0.444743	0.351891		4.66667	5	145.667	3.66667	5.33333	0	6	3		5.66667	6	146.667	4.66667	6.33333	1	7	4
EAY15829	TVAG_160020	10.963	3.45458	3.4483	10.1037	0.00147974	2.82981	0.448156	0.348571		40.6667	3.33333	27	78.3333	1161.33	3.66667	478	34		41.6667	4.33333	28	79.3333	1162.33	4.66667	479	35
EAX87387	TVAG_086980	17.4359	4.12399	3.92115	10.094	0.00148751	2.82754	0.448277	0.348454		63.6667	6	1.33333	55	2188	41.6667	20.6667	12.3333		64.6667	7	2.33333	56	2189	42.6667	21.6667	13.3333
EAY04694	TVAG_474920	0.0643777	-3.9573	-0.795706	10.0651	0.00151102	2.82073	0.4509	0.34592		0	14.3333	0.666667	58.6667	0	0	0	1		1	15.3333	1.66667	59.6667	1	1	1	2
EAX82766	TVAG_001030	16	4	-1.09575	10.0204	0.00154814	2.81019	0.459721	0.337506		0	0	0	0	0.333333	0	59	0.666667		1	1	1	1	1.33333	1	60	1.66667
EAY02131	TVAG_007660	0.112245	-3.15528	2.15322	9.96026	0.00159955	2.796	0.465899	0.331709		8	349	18.3333	110.667	12	11.3333	10.3333	17.3333		9	350	19.3333	111.667	13	12.3333	11.3333	18.3333
EAX79352	TVAG_542940	0.0705882	-3.82443	-0.823189	9.96029	0.00159953	2.79601	0.465899	0.331709		0	52	0	0.666667	0	0	0	0		1	53	1	1.66667	1	1	1	1
EAY05487	TVAG_080790	8.46377	3.0813	1.39161	9.94107	0.00161632	2.79147	0.46854	0.329254		7	2.33333	1	31.6667	237.333	1	50.3333	96.6667		8	3.33333	2	32.6667	238.333	2	51.3333	97.6667
EAY23532	TVAG_070125	15.3684	3.9419	-0.482415	9.90538	0.00164796	2.78305	0.470985	0.326993		0.666667	0.333333	0	1.33333	88.3333	0.333333	2.66667	2		1.66667	1.33333	1	2.33333	89.3333	1.33333	3.66667	3
EAY22441	TVAG_379200	0.0897149	-3.47851	5.26447	9.89674	0.00165571	2.78101	0.470989	0.326989		85.6667	100	3272.33	116	94.3333	71	118.667	33		86.6667	101	3273.33	117	95.3333	72	119.667	34
EAX83432	TVAG_466540	0.0578947	-4.11042	0.43704	9.8343	0.00171287	2.76627	0.48067	0.318153		0.666667	0.333333	121	0.666667	2	0.333333	1	0		1.66667	1.33333	122	1.66667	3	1.33333	2	1
EAX84644	TVAG_420740	0.0286299	-5.12634	0.890509	9.83706	0.0017103	2.76693	0.48067	0.318153		3.66667	0	0	318.333	0	0	3.66667	1.66667		4.66667	1	1	319.333	1	1	4.66667	2.66667
EAY03559	TVAG_042110	0.0380952	-4.71425	0.520386	9.76001	0.00178349	2.74873	0.491267	0.308683		0.666667	0.666667	0.333333	239.333	2.33333	0	0.666667	2.33333		1.66667	1.66667	1.33333	240.333	3.33333	1	1.66667	3.33333
EAY08587	TVAG_191100	0.084144	-3.571	2.49514	9.71592	0.00182679	2.73831	0.496943	0.303693		640.333	4	2.66667	34.3333	2	3	26.6667	22		641.333	5	3.66667	35.3333	3	4	27.6667	23
EAY18887	TVAG_295400	0.0662722	-3.91545	1.54406	9.65566	0.00188769	2.72407	0.504006	0.297564		0.666667	0	255.667	21.3333	5	2	6.33333	1.33333		1.66667	1	256.667	22.3333	6	3	7.33333	2.33333
EAY07017	TVAG_174870	8.95209	3.16222	5.10268	9.65827	0.00188501	2.72469	0.504006	0.297564		63.6667	45.6667	39.6667	396.667	22.6667	234.667	4465	194.333		64.6667	46.6667	40.6667	397.667	23.6667	235.667	4466	195.333
EAX85347	TVAG_385460	0.096	-3.38082	-1.5799	9.59279	0.00195343	2.7092	0.514783	0.288376		1	0	0.333333	36.3333	0	0	0	0		2	1	1.33333	37.3333	1	1	1	1
EAX91894	TVAG_058090	19.5833	4.29155	-0.882689	9.5336	0.00201744	2.6952	0.522603	0.281828		0	0	0	0	0.333333	0	0	74		1	1	1	1	1.33333	1	1	75
EAY09820	TVAG_259010	9.37778	3.22925	0.0966652	9.47922	0.00207812	2.68233	0.536041	0.270802		1.66667	1.66667	4	3.66667	103	3	23.6667	7		2.66667	2.66667	5	4.66667	104	4	24.6667	8
EAX91907	TVAG_326510	0.0479339	-4.38281	0.749313	9.39874	0.00217135	2.66327	0.546203	0.262646		195.667	0	0	2	0.666667	0.333333	2.66667	2		196.667	1	1	3	1.66667	1.33333	3.66667	3
EAY12120	TVAG_301370	15.34	3.93923	1.73787	9.4024	0.00216702	2.66414	0.546203	0.262646		1.33333	0	1	27	458	2	2.33333	45		2.33333	1	2	28	459	3	3.33333	46
EAY14969	TVAG_396990	0.102749	-3.28281	2.2479	9.41714	0.00214967	2.66763	0.546203	0.262646		63.3333	428	0.333333	13.6667	26.6667	4.33333	7.33333	10		64.3333	429	1.33333	14.6667	27.6667	5.33333	8.33333	11
EAY02681	TVAG_406580	0.0376648	-4.73064	0.559455	9.42734	0.00213774	2.67005	0.546203	0.262646		172.667	0	0	0.333333	1.66667	0	1	0		173.667	1	1	1.33333	2.66667	1	2	1
EAY20326	TVAG_193020	0.0732601	-3.77083	-0.246989	9.43177	0.00213259	2.67109	0.546203	0.262646		1.33333	73.3333	0	12.3333	2.33333	0	0.333333	0		2.33333	74.3333	1	13.3333	3.33333	1	1.33333	1
EAY05122	TVAG_108560	13.5111	3.75607	2.30214	9.35238	0.00222696	2.65229	0.54934	0.260159		32.3333	2.66667	0.333333	5.66667	1	69.3333	518	15.6667		33.3333	3.66667	1.33333	6.66667	2	70.3333	519	16.6667
EAX87274	TVAG_058920	0.115385	-3.11548	-1.54578	9.36996	0.0022057	2.65645	0.54934	0.260159		25.3333	0	0	5.33333	0	0	0	0		26.3333	1	1	6.33333	1	1	1	1
EAY21182	TVAG_283510	8.33962	3.05998	0.987178	9.29807	0.00229395	2.63942	0.556351	0.254651		6	5	4.33333	16	75.6667	0	177.667	37.3333		7	6	5.33333	17	76.6667	1	178.667	38.3333
EAY22482	TVAG_035050	17.3636	4.118	-0.141317	9.3054	0.0022848	2.64115	0.556351	0.254651		0	0	1	2.33333	0.333333	5	117.333	0.666667		1	1	2	3.33333	1.33333	6	118.333	1.66667
EAX88041	TVAG_207260	18.5882	4.21632	-0.513229	9.30635	0.00228361	2.64138	0.556351	0.254651		0	0	0	1.66667	0	0	19.6667	81.6667		1	1	1	2.66667	1	1	20.6667	82.6667
EAY13775	TVAG_467900	0.119449	-3.06554	0.926619	9.20373	0.00241522	2.61704	0.572753	0.242033		66	77.3333	7	63.3333	15.3333	4.33333	0.666667	1.66667		67	78.3333	8	64.3333	16.3333	5.33333	1.66667	2.66667
EAY14430	TVAG_426230	26.619	4.73439	0.227102	9.16993	0.00246024	2.60902	0.578087	0.238007		0	3	0	0	2.66667	0	176.333	3.33333		1	4	1	1	3.66667	1	177.333	4.33333
EAY11117	TVAG_358960	35.6	5.15381	0.825564	9.14231	0.00249766	2.60247	0.580483	0.23621		0	0	0	4.33333	0	0.333333	292	0.333333		1	1	1	5.33333	1	1.33333	293	1.33333
EAX89518	TVAG_372300	15.4545	3.94996	0.522657	9.06777	0.00260154	2.58477	0.596925	0.22408		1	0	0.333333	9.33333	17	0.333333	202.667	2.66667		2	1	1.33333	10.3333	18	1.33333	203.667	3.66667
EAY22953	TVAG_077000	0.0650069	-3.94326	2.73892	8.96715	0.00274877	2.56086	0.608145	0.215993		10	688.333	0.333333	20.3333	4.33333	9	8.33333	21.3333		11	689.333	1.33333	21.3333	5.33333	10	9.33333	22.3333
EAX99132	TVAG_115360	0.12465	-3.00405	1.15773	8.97919	0.00273072	2.56372	0.608145	0.215993		24	197	1.66667	11.3333	4.66667	0	1.33333	19.6667		25	198	2.66667	12.3333	5.66667	1	2.33333	20.6667
EAX83003	TVAG_572990	22.8462	4.51388	-0.489317	8.98397	0.00272358	2.56486	0.608145	0.215993		0	0.333333	0	0	95	0	0	0		1	1.33333	1	1	96	1	1	1
EAY02595	TVAG_254960	14.5	3.85798	-1.12527	8.98447	0.00272284	2.56498	0.608145	0.215993		0	0	0	0	53.6667	0	0.333333	0		1	1	1	1	54.6667	1	1.33333	1
EAX95129	TVAG_385170	10.4167	3.38082	-1.56716	9.00288	0.00269555	2.56935	0.608145	0.215993		0	0	0	0	0	0	1.66667	36		1	1	1	1	1	1	2.66667	37
EAY03147	TVAG_345210	0.08	-3.64386	-1.07758	8.86667	0.00290424	2.53697	0.614655	0.211368		45.6667	0.333333	0	0	0	0	0	0		46.6667	1.33333	1	1	1	1	1	1
EAY04203	TVAG_298210	11.1006	3.47257	2.13805	8.8793	0.00288422	2.53997	0.614655	0.211368		26.3333	1.66667	0	21	0	45.3333	305.333	233.667		27.3333	2.66667	1	22	1	46.3333	306.333	234.667
EAY22831	TVAG_075780	0.0769896	-3.69919	2.81467	8.88261	0.002879	2.54076	0.614655	0.211368		0	10.6667	495.667	260.333	16.3333	9.66667	27	2.33333		1	11.6667	496.667	261.333	17.3333	10.6667	28	3.33333
EAY06936	TVAG_099760	0.108824	-3.19994	-0.135278	8.89749	0.00285563	2.5443	0.614655	0.211368		9.66667	40.3333	0.333333	59	2.33333	0	0.333333	5.66667		10.6667	41.3333	1.33333	60	3.33333	1	1.33333	6.66667
EAY05298	TVAG_336900	0.0689655	-3.85798	-0.248143	8.83071	0.00296203	2.52841	0.623922	0.204869		0	82	0.333333	0.666667	0.333333	0	0.333333	1.33333		1	83	1.33333	1.66667	1.33333	1	1.33333	2.33333
EAX72515	TVAG_589710	28.2667	4.82103	-0.0373663	8.80768	0.00299965	2.52293	0.628426	0.201746		0	0.666667	0.333333	0	137.333	0	0	0		1	1.66667	1.33333	1	138.333	1	1	1
EAX84166	TVAG_599430	15.0435	3.91107	-0.28046	8.71871	0.00314961	2.50174	0.641245	0.192976		0	0	2.33333	1.33333	47.6667	1.33333	62.3333	0		1	1	3.33333	2.33333	48.6667	2.33333	63.3333	1
EAX85346	TVAG_385450	0.0786517	-3.66838	-1.1979	8.72262	0.00314286	2.50267	0.641245	0.192976		1	0.333333	0.333333	53.6667	0.333333	0	0.333333	0		2	1.33333	1.33333	54.6667	1.33333	1	1.33333	1
EAX90584	TVAG_221270	0.0686567	-3.86446	-0.035537	8.69515	0.00319058	2.49613	0.645271	0.190258		105	1	0	1.66667	0.333333	0.333333	2	1		106	2	1	2.66667	1.33333	1.33333	3	2
EAY23731	TVAG_120690	11.2329	3.48966	0.867037	8.6493	0.00327188	2.4852	0.650901	0.186485		1.33333	0.333333	1.66667	17	162	1	1.66667	104.667		2.33333	1.33333	2.66667	18	163	2	2.66667	105.667
EAX95539	TVAG_126690	11.1009	3.4726	2.50354	8.63585	0.00329611	2.482	0.653585	0.184698		2	22.6667	10.6667	36.6667	789	2.66667	32.3333	15.6667		3	23.6667	11.6667	37.6667	790	3.66667	33.3333	16.6667
EAY02594	TVAG_254950	12.4167	3.63421	-1.29788	8.61944	0.00332594	2.47809	0.657359	0.182197		0	0	0	0	45.3333	0	0	0.333333		1	1	1	1	46.3333	1	1	1.33333
EAY11216	TVAG_127230	0.121391	-3.04227	2.42417	8.60247	0.00335707	2.47404	0.661364	0.17956		6	531.667	3.66667	20.3333	12.6667	5	12.3333	34.6667		7	532.667	4.66667	21.3333	13.6667	6	13.3333	35.6667
EAX86373	TVAG_130430	9.59211	3.26185	0.781826	8.57449	0.00340906	2.46737	0.668263	0.175052		1.66667	7.66667	2	10	188	1.66667	4.33333	45		2.66667	8.66667	3	11	189	2.66667	5.33333	46
EAY21675	TVAG_237010	17.0378	4.09067	2.66419	8.55306	0.00344941	2.46226	0.670872	0.173361		9.66667	37	2	9	8.33333	3.33333	1019.33	15.6667		10.6667	38	3	10	9.33333	4.33333	1020.33	16.6667
EAX91954	TVAG_375810	12.4091	3.63333	-0.553407	8.5098	0.00353239	2.45193	0.678341	0.168552		3	0	0	0.333333	22	2.33333	62.3333	0.333333		4	1	1	1.33333	23	3.33333	63.3333	1.33333
EAX68929	TVAG_583010	9.5625	3.25739	-1.22719	8.52236	0.00350809	2.45493	0.678341	0.168552		0.333333	0.333333	0	0.666667	39.3333	0.666667	7	0		1.33333	1.33333	1	1.66667	40.3333	1.66667	8	1
EAX86201	TVAG_364750	0.0444444	-4.49185	0.229668	8.4977	0.00355596	2.44904	0.678586	0.168395		0	0.666667	0.666667	189.667	3	0	0.666667	1		1	1.66667	1.66667	190.667	4	1	1.66667	2
EAY07315	TVAG_223780	17.2703	4.11022	0.418626	8.47075	0.00360902	2.44261	0.68442	0.164677		4	2.33333	0.666667	1.33333	0.333333	0	26.3333	182.333		5	3.33333	1.66667	2.33333	1.33333	1	27.3333	183.333
EAX96471	TVAG_024820	0.096463	-3.37388	0.155208	8.43324	0.00368423	2.43365	0.690085	0.161097		4	5	83	7.66667	0	2	0.333333	3.66667		5	6	84	8.66667	1	3	1.33333	4.66667
EAX84149	TVAG_072960	0.0691824	-3.85345	0.999088	8.42709	0.00369672	2.43218	0.690301	0.160962		0.333333	196.333	11	0.333333	9.66667	0	0.333333	0.666667		1.33333	197.333	12	1.33333	10.6667	1	1.33333	1.66667
EAY12581	TVAG_154320	10.1227	3.33953	2.2022	8.39658	0.00375929	2.42489	0.695582	0.157652		11	8	4.66667	45.6667	7.33333	1	656.667	73.3333		12	9	5.66667	46.6667	8.33333	2	657.667	74.3333
EAX94101	TVAG_336640	10.1702	3.34628	0.09637	8.38008	0.00379356	2.42095	0.696882	0.15684		0	0.333333	0.333333	11	18	0.333333	90.3333	46.6667		1	1.33333	1.33333	12	19	1.33333	91.3333	47.6667
EAY19840	TVAG_129480	0.0580737	-4.10597	0.98952	8.34086	0.00387632	2.41158	0.702294	0.153481		227.667	0	1.33333	2.33333	0.333333	1.66667	4	3.66667		228.667	1	2.33333	3.33333	1.33333	2.66667	5	4.66667
EAX90105	TVAG_256100	8.76238	3.13132	1.12183	8.32012	0.00392082	2.40662	0.703956	0.152454		2.33333	19.3333	0	8	173.667	8.66667	9.33333	99.3333		3.33333	20.3333	1	9	174.667	9.66667	10.3333	100.333
EAX89815	TVAG_085890	0.0837927	-3.57703	1.47445	8.20214	0.00418411	2.3784	0.721551	0.141733		47.3333	250	0.333333	0.666667	5	0	0	16.3333		48.3333	251	1.33333	1.66667	6	1	1	17.3333
EAX86096	TVAG_264580	0.0869565	-3.52356	-1.0767	8.17976	0.00423603	2.37304	0.728442	0.137605		0	42	0	0	0	0	0	0		1	43	1	1	1	1	1	1
EAX95744	TVAG_105030	8.16667	3.02975	-1.79585	8.16885	0.0042616	2.37043	0.730464	0.136401		0	0	0	0	0	0	28	0.666667		1	1	1	1	1	1	29	1.66667
EAY15265	TVAG_394080	0.0935673	-3.41785	-1.18815	8.13853	0.00433345	2.36317	0.732774	0.13503		4.33333	1	0.333333	47.3333	0	0.333333	1	0		5.33333	2	1.33333	48.3333	1	1.33333	2	1
EAY19870	TVAG_129780	0.0932642	-3.42253	0.365827	8.11331	0.00439414	2.35713	0.738932	0.131395		0	86	37.6667	1	7	0	0.333333	0.666667		1	87	38.6667	2	8	1	1.33333	1.66667
EAX92288	TVAG_108050	10	3.32193	-0.0949981	8.06179	0.00452085	2.34478	0.756062	0.121442		4	0.333333	0	4.66667	91.6667	0	16	18.3333		5	1.33333	1	5.66667	92.6667	1	17	19.3333
EAX91184	TVAG_287080	19.4615	4.28255	0.30528	8.05146	0.0045467	2.3423	0.756231	0.121346		0.333333	4	0	0.333333	159	5	0	0.666667		1.33333	5	1	1.33333	160	6	1	1.66667
EAY18839	TVAG_294910	0.103825	-3.26777	-1.08458	7.98674	0.00471211	2.32678	0.767102	0.115147		0	2.66667	3.66667	50.6667	0.666667	0	1	0.666667		1	3.66667	4.66667	51.6667	1.66667	1	2	1.66667
EAY22854	TVAG_076010	0.0953757	-3.39023	0.306264	7.99127	0.00470034	2.32787	0.767102	0.115147		1	33	72.3333	5	1.66667	3	0.333333	2		2	34	73.3333	6	2.66667	4	1.33333	3
EAX71982	TVAG_524510	13.0794	3.70922	0.9347	7.96329	0.00477355	2.32116	0.768757	0.114211		1.33333	0	4.33333	11.3333	260.667	2.66667	6.33333	1		2.33333	1	5.33333	12.3333	261.667	3.66667	7.33333	2
EAY07285	TVAG_223480	0.0819672	-3.60881	-0.710565	7.91804	0.00489442	2.3103	0.779587	0.108135		0.333333	56.3333	0.333333	0	0	0	1	0		1.33333	57.3333	1.33333	1	1	1	2	1
EAX88703	TVAG_005000	0.125	-3	-1.73903	7.82414	0.00515529	2.28775	0.783647	0.10588		0	2	0	28.6667	0	0	0	0.333333		1	3	1	29.6667	1	1	1	1.33333
EAY13453	TVAG_206210	16	4	-0.666706	7.83946	0.0051118	2.29143	0.783647	0.10588		0	0	0	1.66667	0	0.333333	85.3333	1		1	1	1	2.66667	1	1.33333	86.3333	2
EAX88232	TVAG_348740	0.122642	-3.02748	-1.46741	7.84002	0.00511021	2.29156	0.783647	0.10588		30	1.33333	0	0	0	0	0	0.333333		31	2.33333	1	1	1	1	1	1.33333
EAY23441	TVAG_071050	12.2778	3.61798	-0.884113	7.84937	0.00508385	2.29381	0.783647	0.10588		0.666667	0.333333	0.333333	0.666667	0.333333	1	0.666667	67.6667		1.66667	1.33333	1.33333	1.66667	1.33333	2	1.66667	68.6667
EAY15173	TVAG_201670	0.0545746	-4.19563	0.328494	7.75169	0.00536623	2.27033	0.793964	0.100199		2	1.66667	0	200	0	0	1.66667	5.66667		3	2.66667	1	201	1	1	2.66667	6.66667
EAX97074	TVAG_086130	14.6001	3.8679	6.80727	7.76594	0.00532407	2.27376	0.793964	0.100199		31.6667	0.333333	13	1192	14356	12.6667	720.667	3025.33		32.6667	1.33333	14	1193	14357	13.6667	721.667	3026.33
EAY09250	TVAG_133070	0.112554	-3.15131	-0.242063	7.69658	0.00553256	2.25707	0.794542	0.0998832		1.66667	0.333333	68	3	0	0.333333	3.33333	1		2.66667	1.33333	69	4	1	1.33333	4.33333	2
EAY23152	TVAG_183890	8.28571	3.05063	-1.54593	7.70609	0.00550348	2.25936	0.794542	0.0998832		0.666667	0	0	0	0	1.66667	32.3333	0.666667		1.66667	1	1	1	1	2.66667	33.3333	1.66667
EAY12182	TVAG_003880	0.0519896	-4.26563	4.23863	7.6197	0.0057734	2.23857	0.806144	0.0935873		35	9	10.3333	3275.67	56.3333	31.6667	9.33333	72		36	10	11.3333	3276.67	57.3333	32.6667	10.3333	73
EAY05925	TVAG_087030	0.0680878	-3.87646	3.33391	7.62881	0.00574433	2.24076	0.806144	0.0935873		131.667	165.333	505.667	241	19.6667	43.6667	2.66667	1.33333		132.667	166.333	506.667	242	20.6667	44.6667	3.66667	2.33333
EAY08229	TVAG_308350	9.64063	3.26913	0.451117	7.57351	0.00592324	2.22744	0.808794	0.0921618		1	0	0	16.3333	43.6667	0.333333	137.667	20		2	1	1	17.3333	44.6667	1.33333	138.667	21
EAY20024	TVAG_402810	0.0695951	-3.84487	3.77032	7.57559	0.0059164	2.22794	0.808794	0.0921618		13	19	1167.33	56.3333	13	39	14.6667	17		14	20	1168.33	57.3333	14	40	15.6667	18
EAY03388	TVAG_489320	11.3333	3.5025	-1.46809	7.5774	0.00591047	2.22838	0.808794	0.0921618		0	0	0	0	0	0	41.3333	0		1	1	1	1	1	1	42.3333	1
EAY01317	TVAG_407460	0.0579244	-4.10969	2.12599	7.57948	0.00590363	2.22888	0.808794	0.0921618		0	0.666667	409.667	0	16	0	2.66667	1.33333		1	1.66667	410.667	1	17	1	3.66667	2.33333
EAY16160	TVAG_465480	17.0556	4.09217	-0.518024	7.5968	0.00584721	2.23305	0.808794	0.0921618		0	0	1.33333	0.666667	0.333333	0	96.3333	1.66667		1	1	2.33333	1.66667	1.33333	1	97.3333	2.66667
EAX99871	TVAG_425080	10.5833	3.40372	-1.46931	7.55225	0.00599352	2.22232	0.808992	0.0920558		0	0	0	0	38.3333	0	0	0		1	1	1	1	39.3333	1	1	1
EAY03240	TVAG_421270	0.111111	-3.16993	-1.08562	7.54633	0.00601323	2.22089	0.809611	0.0917236		0.666667	40	0.333333	0	0	0	0.666667	0.333333		1.66667	41	1.33333	1	1	1	1.66667	1.33333
EAX89662	TVAG_171420	0.0777778	-3.6845	0.369369	7.52815	0.00607423	2.21651	0.810896	0.0910349		0	3.66667	112.333	0	0.333333	0	0	5		1	4.66667	113.333	1	1.33333	1	1	6
EAY04050	TVAG_055360	8.33333	3.05889	1.35077	7.47966	0.00623998	2.20482	0.819798	0.086293		7	6	9.33333	16.6667	325	1.33333	12	16		8	7	10.3333	17.6667	326	2.33333	13	17
EAX87970	TVAG_033620	0.0842697	-3.56884	-0.735511	7.44041	0.00637754	2.19535	0.821372	0.0854602		0.666667	53.6667	0	1	0	0.666667	0	0.333333		1.66667	54.6667	1	2	1	1.66667	1	1.33333
EAX87192	TVAG_313650	20.1176	4.33039	-0.40269	7.38564	0.00657467	2.18213	0.824808	0.0836469		0.333333	0	0	1.33333	0	0	110	0		1.33333	1	1	2.33333	1	1	111	1
EAX87028	TVAG_052250	0.024974	-5.32343	2.81802	7.35685	0.00668077	2.17517	0.831121	0.0803357		2.66667	0.333333	1	1273.33	13.6667	10	2.33333	2		3.66667	1.33333	2	1274.33	14.6667	11	3.33333	3
EAX98958	TVAG_321180	0.115819	-3.11005	0.233137	7.34757	0.00671535	2.17293	0.83258	0.0795739		0	104.333	7.66667	2	2	1	2.66667	4		1	105.333	8.66667	3	3	2	3.66667	5
EAY02316	TVAG_275900	9.36691	3.22757	1.65997	7.29663	0.00690839	2.16062	0.841096	0.0751542		25.6667	6.66667	3.33333	6.66667	408.667	8.33333	4	9		26.6667	7.66667	4.33333	7.66667	409.667	9.33333	5	10
EAY04204	TVAG_298220	8.28085	3.04978	3.22435	7.30775	0.00686578	2.16331	0.841096	0.0751542		93	21	0.666667	38	2.33333	64.3333	621.333	605.333		94	22	1.66667	39	3.33333	65.3333	622.333	606.333
EAX93627	TVAG_336130	0.0452381	-4.46632	3.84188	7.09802	0.00771692	2.11256	0.883021	0.0540288		495.667	268	370.667	541.667	1	63.3333	3	4.66667		496.667	269	371.667	542.667	2	64.3333	4	5.66667
EAX96202	TVAG_000310	8.70145	3.12126	6.08023	7.03901	0.00797532	2.09825	0.883607	0.053741		8.33333	19.3333	294.333	19	2	2558.67	429.333	8		9.33333	20.3333	295.333	20	3	2559.67	430.333	9
EAY23141	TVAG_183780	0.12402	-3.01136	7.39364	7.05363	0.00791047	2.1018	0.883607	0.053741		1023.33	956	11489.3	2041	235.333	779.333	506.667	398.667		1024.33	957	11490.3	2042	236.333	780.333	507.667	399.667
EAX93817	TVAG_054220	0.0623811	-4.00275	3.19394	7.00128	0.00814516	2.0891	0.888596	0.0512958		1.33333	362.667	500.667	7.66667	5.66667	27.6667	5.66667	11.6667		2.33333	363.667	501.667	8.66667	6.66667	28.6667	6.66667	12.6667
EAX99899	TVAG_222600	8.4375	3.07682	0.706412	6.94411	0.00840955	2.07523	0.896552	0.0474244		13.6667	4.33333	4.66667	0	42	5.66667	9.66667	163.667		14.6667	5.33333	5.66667	1	43	6.66667	10.6667	164.667
EAX82539	TVAG_484810	0.11399	-3.13303	-0.594651	6.92168	0.0085157	2.06978	0.898429	0.0465164		0	48.6667	8.66667	3	0	0.666667	2.66667	0		1	49.6667	9.66667	4	1	1.66667	3.66667	1
EAY13380	TVAG_424110	8.23913	3.04249	-0.153944	6.91847	0.008531	2.069	0.898485	0.046489		0.333333	2.33333	1.33333	7.33333	14.3333	0.333333	99.6667	8		1.33333	3.33333	2.33333	8.33333	15.3333	1.33333	100.667	9
EAY00656	TVAG_TEG_DS113593_1_1	0.0858896	-3.54137	-0.84997	6.61186	0.0101302	1.99438	0.937986	0.0278036		0	50.3333	0	0	0.333333	0.333333	0	0		1	51.3333	1	1	1.33333	1.33333	1	1
EAX85300	TVAG_047400	0.0581717	-4.10354	0.19101	6.63942	0.00997466	2.0011	0.937986	0.0278036		0	116.333	0	0	3	0	0	0		1	117.333	1	1	4	1	1	1
EAY03903	TVAG_192020	13.1556	3.7176	0.363001	6.56206	0.0104176	1.98223	0.939772	0.0269777		2	6	0.666667	2.33333	1.33333	1	1	190		3	7	1.66667	3.33333	2.33333	2	2	191
EAY19121	TVAG_190150	0.0689332	-3.85866	8.28699	6.57845	0.0103221	1.98623	0.939772	0.0269777		21.3333	22520.7	10177	4.33333	2218.33	6	18.3333	9.33333		22.3333	22521.7	10178	5.33333	2219.33	7	19.3333	10.3333
EAY16803	TVAG_447620	0.0741758	-3.75291	0.390092	6.52868	0.0106149	1.97409	0.941953	0.0259707		0	0	117.333	0	4	0	1	0		1	1	118.333	1	5	1	2	1
EAY15264	TVAG_394070	0.113821	-3.13516	-1.58901	6.39158	0.0114663	1.94058	0.965612	0.0151975		0	0.333333	0	36.6667	0	0	0.333333	0.333333		1	1.33333	1	37.6667	1	1	1.33333	1.33333
EAY11100	TVAG_358790	9.58095	3.26017	1.18741	6.34915	0.0117438	1.93019	0.97288	0.0119406		3.66667	9.33333	13.6667	4.33333	53.3333	2	274.333	1.66667		4.66667	10.3333	14.6667	5.33333	54.3333	3	275.333	2.66667
EAY02666	TVAG_253170	36.0769	5.173	1.58933	6.3335	0.0118479	1.92636	0.975376	0.010828		0.666667	0	8.33333	0	464.667	0	0.333333	0		1.66667	1	9.33333	1	465.667	1	1.33333	1
EAY02165	TVAG_213640	0.105952	-3.23851	1.59227	1.69423	0.193044	0.714343	1	0		177.333	0.333333	98.3333	0	0.333333	23.6667	1.33333	0.333333		178.333	1.33333	99.3333	1	1.33333	24.6667	2.33333	1.33333
EAY13229	TVAG_097990	0.0867188	-3.52751	4.91201	1.98915	0.15843	0.800162	1	0		224	24.6667	10	4127	40.6667	256.333	57.6667	22		225	25.6667	11	4128	41.6667	257.333	58.6667	23
EAY15178	TVAG_201720	0.107143	-3.22239	-0.204439	2.10214	0.147093	0.832408	1	0		15.6667	1	0.333333	91	0	6	0.333333	1.66667		16.6667	2	1.33333	92	1	7	1.33333	2.66667
EAY09861	TVAG_259420	0.115556	-3.11334	-0.408986	2.25391	0.133277	0.875244	1	0		66.3333	0	3.33333	1.33333	0	4.33333	0	0.333333		67.3333	1	4.33333	2.33333	1	5.33333	1	1.33333
EAY07182	TVAG_197960	9.27778	3.21378	0.308039	2.54207	0.11085	0.955266	1	0		0.333333	13.6667	0	0	162.667	0	0	0.333333		1.33333	14.6667	1	1	163.667	1	1	1.33333
EAY07183	TVAG_197970	9.75	3.2854	0.50855	2.76382	0.0964175	1.01584	1	0		0.333333	15.6667	0	0	189.667	0	0	1.33333		1.33333	16.6667	1	1	190.667	1	1	2.33333
EAX83912	TVAG_341830	0.0575374	-4.11936	0.883624	3.15282	0.0757958	1.12035	1	0		2	0.666667	0.666667	282.333	0	9	1.66667	2		3	1.66667	1.66667	283.333	1	10	2.66667	3
EAX82748	TVAG_513900	10.1239	3.33969	2.92421	3.34357	0.0674682	1.1709	1	0		2.33333	99.6667	6.66667	0.333333	594	0.333333	545.667	0		3.33333	100.667	7.66667	1.33333	595	1.33333	546.667	1
EAX83737	TVAG_041470	11.3529	3.50499	0.6057	3.5743	0.0586802	1.23151	1	0		0	0	13	0	0.333333	15.6667	0	173		1	1	14	1	1.33333	16.6667	1	174
EAX77470	TVAG_418400	8.29167	3.05166	-0.868071	3.69065	0.0547182	1.26187	1	0		0	1.66667	2	0.333333	62	0.333333	0	0		1	2.66667	3	1.33333	63	1.33333	1	1
EAY02665	TVAG_253160	17.8197	4.1554	1.29062	3.7511	0.0527727	1.27759	1	0		0.666667	0	15.6667	0	358	0	0.333333	0		1.66667	1	16.6667	1	359	1	1.33333	1
EAY08956	TVAG_486030	9.40602	3.23358	1.56412	3.89809	0.048341	1.31568	1	0		4	33.6667	0.666667	2	409.333	0.666667	1.33333	1.66667		5	34.6667	1.66667	3	410.333	1.66667	2.33333	2.66667
EAX93618	TVAG_336040	0.111369	-3.16658	-0.0565396	4.10655	0.0427173	1.3694	1	0		8	0	0	131.667	0.666667	0.333333	0	11		9	1	1	132.667	1.66667	1.33333	1	12
EAX70757	TVAG_502650	0.0954198	-3.38957	-0.141047	4.13295	0.042056	1.37617	1	0		27.3333	0	44.6667	11.3333	0.333333	4	0	0		28.3333	1	45.6667	12.3333	1.33333	5	1	1
EAY02708	TVAG_440870	0.0888031	-3.49325	-0.400433	4.14181	0.0418364	1.37845	1	0		61	0	0	21.3333	0	2.33333	1.33333	0		62	1	1	22.3333	1	3.33333	2.33333	1
EAY06884	TVAG_056780	0.082618	-3.5974	1.73852	4.31103	0.0378661	1.42175	1	0		107	2	194	3.66667	1.66667	17	1	2		108	3	195	4.66667	2.66667	18	2	3
EAX94018	TVAG_082250	10.5061	3.39316	3.87159	4.35132	0.0369802	1.43203	1	0		1.33333	17.3333	186	8.66667	294.333	0.333333	1264.33	720.333		2.33333	18.3333	187	9.66667	295.333	1.33333	1265.33	721.333
EAX87729	TVAG_208330	0.0995624	-3.32826	1.35073	4.35668	0.0368641	1.4334	1	0		236.667	0	0.333333	63.6667	1.66667	7.33333	17	0.333333		237.667	1	1.33333	64.6667	2.66667	8.33333	18	1.33333
EAY10664	TVAG_157410	0.0517241	-4.27302	2.11266	4.44263	0.0350523	1.45528	1	0		4	429	5	2.66667	0	16.3333	2	0.666667		5	430	6	3.66667	1	17.3333	3	1.66667
EAX94370	TVAG_068380	14.5897	3.86688	2.19591	4.7557	0.0292014	1.5346	1	0		2.33333	15.3333	21.6667	8.66667	0.666667	0	0.666667	753.333		3.33333	16.3333	22.6667	9.66667	1.66667	1	1.66667	754.333
EAX95980	TVAG_052380	10.3433	3.37062	0.7005	4.76095	0.0291125	1.53592	1	0		0.333333	7	0.666667	10.3333	226	0	0.333333	0.666667		1.33333	8	1.66667	11.3333	227	1	1.33333	1.66667
EAY06265	TVAG_034440	0.113007	-3.14552	6.46975	4.76441	0.029054	1.53679	1	0		2314.33	714.333	1716.33	5527.67	147	670	202.667	137.667		2315.33	715.333	1717.33	5528.67	148	671	203.667	138.667
EAY16533	TVAG_348430	8.29268	3.05184	-0.207503	4.76814	0.0289912	1.53773	1	0		5.66667	0	0	4	0	4.66667	103.333	1.33333		6.66667	1	1	5	1	5.66667	104.333	2.33333
EAY06887	TVAG_056810	0.0708493	-3.8191	7.26315	4.94536	0.0261608	1.58235	1	0		6044.33	132.667	8313	302.667	50	771.667	111	111.667		6045.33	133.667	8314	303.667	51	772.667	112	112.667
EAX81572	TVAG_528020	0.115385	-3.11548	-0.161679	4.94777	0.0261244	1.58295	1	0		69.3333	2.66667	5.66667	13.6667	3.66667	3.33333	0	0		70.3333	3.66667	6.66667	14.6667	4.66667	4.33333	1	1
EAY02457	TVAG_055460	0.106306	-3.2337	0.69044	5.03084	0.0248998	1.6038	1	0		180.667	0	0.333333	0	3	0.333333	0.333333	12		181.667	1	1.33333	1	4	1.33333	1.33333	13
EAX88216	TVAG_043320	0.083004	-3.59068	-0.77551	5.11344	0.0237412	1.6245	1	0		0	0	0.333333	80	1.66667	0.333333	1	0		1	1	1.33333	81	2.66667	1.33333	2	1
EAY09823	TVAG_259040	0.0300836	-5.05488	2.47812	5.13799	0.0234077	1.63064	1	0		11.3333	582.333	0	0.666667	0.333333	13	0.333333	0.333333		12.3333	583.333	1	1.66667	1.33333	14	1.33333	1.33333
EAX91550	TVAG_422450	8.35211	3.06214	0.380178	5.13918	0.0233918	1.63094	1	0		1	0.666667	0.666667	17.3333	0.333333	0	35	158.333		2	1.66667	1.66667	18.3333	1.33333	1	36	159.333
EAY16983	TVAG_281000	0.106383	-3.23266	-1.44876	5.20783	0.0224854	1.6481	1	0		0	0	0	43	0	0	0	1		1	1	1	44	1	1	1	2
EAY02149	TVAG_007840	19.0123	4.24886	2.02472	5.25472	0.0218873	1.65981	1	0		0.333333	0	22.6667	0	469	39.6667	0	0.666667		1.33333	1	23.6667	1	470	40.6667	1	1.66667
EAX93333	TVAG_181260	0.0900064	-3.47383	3.26381	5.29468	0.0213907	1.66977	1	0		0.333333	1034.67	0	1.66667	0.666667	0.666667	2.66667	85.6667		1.33333	1035.67	1	2.66667	1.66667	1.66667	3.66667	86.6667
EAX93617	TVAG_336030	0.125	-3	-1.56391	5.32282	0.021048	1.67679	1	0		2.33333	0	0	33.6667	0	0.666667	0	0.333333		3.33333	1	1	34.6667	1	1.66667	1	1.33333
EAX99736	TVAG_472380	9.07993	3.18268	4.53388	5.32303	0.0210454	1.67684	1	0		24.3333	1	3.66667	375.667	4	64.6667	34.6667	3603.33		25.3333	2	4.66667	376.667	5	65.6667	35.6667	3604.33
EAY02687	TVAG_406640	9.46429	3.24249	-0.635807	5.37853	0.0203861	1.69067	1	0		0.666667	2.66667	0.333333	1.66667	0.666667	0	81.3333	2.33333		1.66667	3.66667	1.33333	2.66667	1.66667	1	82.3333	3.33333
EAX83379	TVAG_124440	0.0917031	-3.44689	-0.896552	5.46752	0.0193731	1.7128	1	0		0	0.333333	0	72	1	0	0.666667	1.33333		1	1.33333	1	73	2	1	1.66667	2.33333
EAX97100	TVAG_451380	12.1392	3.6016	2.33024	5.48133	0.0192206	1.71623	1	0		1	58.3333	1	0.333333	268	0	312.667	200.333		2	59.3333	2	1.33333	269	1	313.667	201.333
EAY01558	TVAG_TEG_DS113564_2_1	0.113281	-3.14202	-0.352285	5.5187	0.0188143	1.72551	1	0		79	1	0	1.33333	0	0.333333	5	0.333333		80	2	1	2.33333	1	1.33333	6	1.33333
EAY04480	TVAG_194450	9.76923	3.28824	-0.617649	5.67483	0.01721	1.76422	1	0		2	0.333333	0	2.33333	78.6667	0	1.66667	0.333333		3	1.33333	1	3.33333	79.6667	1	2.66667	1.33333
EAX93629	TVAG_336150	0.04363	-4.51854	1.04525	5.74753	0.0165119	1.7822	1	0		0	0.666667	184.333	2	0	4	0.333333	0		1	1.66667	185.333	3	1	5	1.33333	1
EAY14778	TVAG_219590	15.7273	3.9752	0.196288	5.7508	0.0164811	1.78301	1	0		0	1	5.66667	0.333333	10.6667	0.333333	158	0		1	2	6.66667	1.33333	11.6667	1.33333	159	1
EAY06263	TVAG_034420	0.055666	-4.16706	0.577581	5.80593	0.0159722	1.79663	1	0		0.666667	23.3333	68.3333	71.3333	0	5.33333	0	0		1.66667	24.3333	69.3333	72.3333	1	6.33333	1	1
EAY02597	TVAG_254980	11.9286	3.57635	-1.22892	5.87326	0.0153726	1.81325	1	0		0	0	0.666667	0	0	0	51.6667	0		1	1	1.66667	1	1	1	52.6667	1
EAX86926	TVAG_012760	9.07143	3.18133	-1.52337	5.91327	0.0150273	1.82312	1	0		0	0	0	0.666667	0	0	38.3333	0		1	1	1	1.66667	1	1	39.3333	1
EAX97099	TVAG_451370	13.3321	3.73683	2.88534	5.92076	0.0149635	1.82497	1	0		1.66667	80.6667	0.333333	0.666667	507	0.666667	230.333	422.333		2.66667	81.6667	1.33333	1.66667	508	1.66667	231.333	423.333
EAX85530	TVAG_022620	0.122093	-3.03395	-0.791081	5.97959	0.0144724	1.83946	1	0		0.333333	49	0	4	0	0	0	3		1.33333	50	1	5	1	1	1	4
EAY16982	TVAG_280990	0.123894	-3.01282	-1.67146	5.98276	0.0144464	1.84024	1	0		0	0.333333	0	33.3333	0	0	0	0.666667		1	1.33333	1	34.3333	1	1	1	1.66667
EAY23706	TVAG_120440	0.0928793	-3.4285	0.12746	5.98352	0.0144402	1.84043	1	0		0	83.6667	20	0	4.33333	1.33333	0	0.333333		1	84.6667	21	1	5.33333	2.33333	1	1.33333
EAY16991	TVAG_281080	8.98789	3.16798	3.92761	6.1121	0.013426	1.87205	1	0		49.3333	2	8	212	10	9	2360.33	91.3333		50.3333	3	9	213	11	10	2361.33	92.3333
EAY22091	TVAG_457260	0.0375451	-4.73523	2.28724	6.11592	0.0133969	1.87299	1	0		0	0.666667	457	0	0	4.66667	8.66667	0		1	1.66667	458	1	1	5.66667	9.66667	1
EAX96972	TVAG_414530	23.7782	4.57157	3.64515	6.21059	0.0126988	1.89624	1	0		3.66667	57.6667	13.6667	3.66667	1959	1.33333	0.333333	1		4.66667	58.6667	14.6667	4.66667	1960	2.33333	1.33333	2
